# Supplementary material for: Genomic insights into cryptic cycles of microbial hydrocarbon production and degradation in contiguous freshwater and marine microbiomes
Source: Microbiome. 2023 May 12;11:104. doi: 10.1186/s40168-023-01537-7 (PMC10176705; doi:10.1186/s40168-023-01537-7)
Supplement: Supplementary file 3 — Additional file 2: Supplementary Dataset 1. Detail of the genes (KO) identified in the MAGs involved in hydrocarbon production and degradation. [file 40168_2023_1537_MOESM2_ESM.xlsx]

## Sheet: Feuil1
		Hydrocarbon production	Hydrocarbon production	Hydrocarbon production	Hydrocarbon production	Hydrocarbon production	Hydrocarbon production	Hydrocarbon production	Hydrocarbon production	Hydrocarbon production	Hydrocarbon production	Hydrocarbon production	Hydrocarbon production	Hydrocarbon production	Hydrocarbon production	Hydrocarbon production	Hydrocarbon production	Hydrocarbon production	Hydrocarbon production	Hydrocarbon production	Hydrocarbon production	Hydrocarbon production	Hydrocarbon production	Hydrocarbon production	Hydrocarbon production	Hydrocarbon production	Hydrocarbon production	Hydrocarbon production	Hydrocarbon degradation	Hydrocarbon degradation	Hydrocarbon degradation	Hydrocarbon degradation	Hydrocarbon degradation	Hydrocarbon degradation	Hydrocarbon degradation	Hydrocarbon degradation	Hydrocarbon degradation	Hydrocarbon degradation	Hydrocarbon degradation	Hydrocarbon degradation	Hydrocarbon degradation	Hydrocarbon degradation	Hydrocarbon degradation	Hydrocarbon degradation	Hydrocarbon degradation	Hydrocarbon degradation	Hydrocarbon degradation	Hydrocarbon degradation	Hydrocarbon degradation
Gene_Name	Noms_KO	bin.420	bin.100	bin.382	bin.666	bin.112	bin.295	bin.110	bin.231	bin.212	bin.415	bin.588	bin.157	bin.51	bin.469	bin.150	bin.21	bin.597	bin.80	bin.601	bin.321	bin.139	bin.375	bin.238	bin.8	bin.473	bin.605	bin.95	bin.464	bin.62	bin.120	bin.267	bin.184	bin.269	bin.164	bin.271	bin.199	bin.3	bin.410	bin.403	bin.676	bin.256	bin.444	bin.326	bin.334	bin.86	bin.658	bin.640	bin.111
nirB; nitrite reductase (NADH) large subunit [EC:1.7.1.15]	K00362	1	0	3	0	0	0	0	0	2	0	1	1	0	0	0	2	0	0	0	0	0	0	1	1	0	0	1	1	0	0	1	0	1	0	1	0	0	0	0	1	0	0	0	0	0	0	1	0
nirD; nitrite reductase (NADH) small subunit [EC:1.7.1.15]	K00363	1	0	2	1	1	0	4	0	2	3	0	0	0	0	0	0	0	0	0	0	0	1	0	0	0	0	0	0	1	0	0	0	0	0	0	0	0	0	0	0	0	0	0	0	0	0	1	0
nirA; ferredoxin-nitrite reductase [EC:1.7.7.1]	K00366	0	1	0	0	1	0	1	0	0	0	0	0	1	0	0	0	0	0	0	0	0	0	0	0	0	0	0	0	0	0	0	0	0	0	0	0	0	0	0	0	0	0	0	0	0	0	0	0
narB; ferredoxin-nitrate reductase [EC:1.7.7.2]	K00367	2	0	0	0	0	0	0	0	0	0	0	0	1	0	0	0	0	0	0	0	0	0	0	0	0	0	0	0	0	0	1	0	0	0	0	0	0	0	0	0	0	0	0	0	0	0	0	0
nirK; nitrite reductase (NO-forming) [EC:1.7.2.1]	K00368	0	0	0	0	0	0	1	1	0	0	0	0	0	0	0	0	0	0	0	0	0	0	0	0	0	0	0	0	0	0	0	0	0	0	0	0	0	0	0	0	0	0	0	0	0	0	0	0
narG, narZ, nxrA; nitrate reductase / nitrite oxidoreductase, alpha subunit [EC:1.7.5.1 1.7.99.-]	K00370	0	0	0	0	0	0	2	1	0	0	0	0	0	0	0	0	0	0	0	0	0	0	0	0	0	0	0	0	0	0	0	0	0	0	0	0	0	0	1	0	0	0	0	0	0	0	0	0
narH, narY, nxrB; nitrate reductase / nitrite oxidoreductase, beta subunit [EC:1.7.5.1 1.7.99.-]	K00371	0	0	0	0	0	0	1	1	0	0	0	0	0	0	0	0	0	0	0	0	0	0	0	0	0	0	0	0	0	0	0	0	0	0	0	0	0	0	1	0	0	0	0	0	0	0	0	0
nasA; assimilatory nitrate reductase catalytic subunit [EC:1.7.99.-]	K00372	0	2	2	0	1	0	0	0	1	0	0	0	0	0	0	0	0	0	0	0	0	0	0	0	0	0	0	0	0	0	0	0	0	0	0	0	0	0	0	0	0	0	0	0	0	0	0	0
narJ, narW; nitrate reductase molybdenum cofactor assembly chaperone NarJ/NarW	K00373	0	0	0	0	0	0	0	0	0	0	0	0	0	0	0	0	0	0	0	0	0	0	0	0	0	0	0	0	0	0	0	0	0	0	0	0	0	0	1	0	0	0	0	0	0	0	0	0
narI, narV; nitrate reductase gamma subunit [EC:1.7.5.1 1.7.99.-]	K00374	0	0	0	0	0	0	0	1	0	0	0	0	0	0	0	0	0	0	0	0	0	0	0	0	0	0	0	0	0	0	1	0	0	0	0	0	0	0	1	0	0	0	0	0	0	0	0	0
nosZ; nitrous-oxide reductase [EC:1.7.2.4]	K00376	0	0	0	0	0	0	0	0	0	1	0	0	0	0	0	2	0	0	0	0	0	0	0	0	0	0	0	0	1	0	0	0	0	0	0	0	0	0	0	0	0	0	0	0	0	0	0	0
napA; periplasmic nitrate reductase NapA [EC:1.7.99.-]	K02567	0	0	0	0	0	0	0	0	2	0	0	0	0	3	0	4	0	2	1	0	0	0	2	0	0	1	0	0	0	0	0	0	0	0	0	0	0	0	0	0	0	0	0	0	0	0	0	0
napB; cytochrome c-type protein NapB	K02568	0	0	0	0	0	0	0	0	1	0	0	0	0	1	0	2	0	0	1	0	0	0	0	0	0	0	0	0	0	0	0	0	0	0	0	0	0	0	0	0	0	0	0	0	0	0	0	0
napC; cytochrome c-type protein NapC	K02569	0	0	0	0	0	0	0	0	0	0	0	0	0	1	0	0	0	0	0	0	0	0	0	0	0	0	0	0	0	0	0	0	0	0	0	1	0	0	0	0	0	0	0	1	0	0	0	0
napD; periplasmic nitrate reductase NapD	K02570	0	0	0	0	0	0	0	0	0	0	0	0	0	0	0	2	0	0	0	0	0	0	0	0	0	0	0	0	0	0	0	0	0	0	0	0	0	0	0	0	0	1	0	0	0	0	0	0
napE; periplasmic nitrate reductase NapE	K02571	0	0	0	0	0	0	0	0	0	0	0	0	0	0	0	0	0	0	0	0	0	0	0	0	0	0	0	0	0	0	0	0	0	0	0	0	0	0	0	0	0	0	0	0	0	0	0	0
napF; ferredoxin-type protein NapF	K02572	0	0	0	0	0	0	0	0	0	1	0	0	0	0	0	0	0	0	0	0	0	0	0	0	0	0	0	0	0	0	0	0	0	0	0	0	0	0	0	0	0	0	0	0	0	0	0	0
napG; ferredoxin-type protein NapG	K02573	0	0	0	1	0	0	0	0	0	2	0	0	0	1	0	1	0	0	0	0	0	0	1	1	0	0	0	0	0	0	0	0	0	0	0	0	0	0	0	0	0	0	0	0	0	0	0	0
napH; ferredoxin-type protein NapH	K02574	0	0	0	1	0	0	0	0	0	1	0	0	0	1	0	1	0	0	0	0	0	0	2	0	0	0	0	0	0	0	0	0	0	0	0	0	0	0	0	0	0	0	0	0	0	0	0	0
nifA; Nif-specific regulatory protein	K02584	0	0	1	0	3	0	2	0	2	2	0	0	0	1	0	2	0	1	1	2	0	1	3	4	1	0	4	1	0	0	1	0	1	0	0	2	1	0	0	0	0	0	1	1	1	0	2	0
nifB; nitrogen fixation protein NifB	K02585	0	0	0	0	0	0	0	0	0	0	0	0	0	0	0	0	0	0	0	0	0	0	0	0	0	0	0	0	0	0	0	0	0	1	0	0	0	0	0	0	0	0	0	0	0	0	1	0
nifD; nitrogenase molybdenum-iron protein alpha chain [EC:1.18.6.1]	K02586	0	0	0	0	0	0	0	0	0	0	0	0	0	0	0	0	0	0	0	0	0	0	0	0	0	0	0	0	0	0	0	0	0	0	0	0	0	0	0	0	0	0	0	0	0	0	1	0
nifE; nitrogenase molybdenum-cofactor synthesis protein NifE	K02587	0	0	0	0	0	0	0	0	0	0	0	0	0	0	0	0	0	0	0	0	0	0	0	0	0	0	0	0	0	0	0	0	0	0	0	0	0	0	0	0	0	0	0	0	0	0	1	0
nifH; nitrogenase iron protein NifH	K02588	0	0	0	0	0	0	0	0	0	0	0	0	0	0	0	0	0	0	0	0	0	0	0	0	0	0	0	0	0	0	0	0	0	0	0	0	0	0	0	0	0	0	0	0	0	0	1	0
nifHD1, nifI1; nitrogen regulatory protein PII 1	K02589	0	0	0	0	0	0	0	0	0	0	0	0	0	0	0	0	0	0	0	0	0	0	0	0	0	0	0	0	0	0	0	0	0	0	0	0	0	0	0	0	0	0	0	0	0	0	2	0
nifHD2, nifI2; nitrogen regulatory protein PII 2	K02590	0	0	0	0	0	0	0	0	0	0	0	0	0	0	0	0	0	0	0	0	0	0	0	0	0	0	0	0	0	0	0	0	0	0	0	0	0	0	0	0	0	0	0	0	0	0	1	0
nifK; nitrogenase molybdenum-iron protein beta chain [EC:1.18.6.1]	K02591	0	0	0	0	0	0	0	0	0	0	0	0	0	0	0	0	0	0	0	0	0	0	0	0	0	0	0	0	0	0	0	0	0	0	0	0	0	0	0	0	0	0	0	0	0	0	1	0
nifN; nitrogenase molybdenum-iron protein NifN	K02592	0	0	0	0	0	0	0	0	0	0	0	0	0	0	0	0	0	0	0	0	0	0	0	0	0	0	0	0	0	0	0	0	0	0	0	0	0	0	0	0	0	0	0	0	0	0	1	0
nrfA; nitrite reductase (cytochrome c-552) [EC:1.7.2.2]	K03385	0	0	0	0	0	0	0	0	0	0	0	0	0	0	0	0	0	1	0	0	0	0	0	0	0	0	0	0	1	0	0	0	0	0	0	0	0	0	0	1	0	0	0	0	0	0	1	0
NR; nitrate reductase (NAD(P)H) [EC:1.7.1.1 1.7.1.2 1.7.1.3]	K10534	0	0	0	0	0	0	0	0	0	0	0	0	0	0	0	0	0	0	0	0	0	0	0	0	0	0	0	0	0	0	0	0	0	0	0	0	0	0	0	0	0	0	0	0	0	0	0	0
nirS; nitrite reductase (NO-forming) / hydroxylamine reductase [EC:1.7.2.1 1.7.99.1]	K15864	0	0	0	0	0	0	0	0	0	0	0	0	0	0	0	0	0	0	0	0	0	0	0	0	0	0	0	0	0	0	0	0	0	0	0	0	0	0	0	0	0	0	0	0	0	0	0	0
nrfH; cytochrome c nitrite reductase small subunit	K15876	0	0	0	0	0	0	0	0	0	0	0	0	0	0	0	0	0	1	0	0	0	0	0	1	0	0	0	0	1	0	0	0	0	0	0	0	0	0	0	1	0	0	0	1	0	0	1	0
ureC; urease subunit alpha [EC:3.5.1.5]	K01428	0	0	0	0	0	0	0	0	0	0	0	0	1	0	0	0	0	0	0	0	0	0	0	0	0	0	0	0	0	0	0	0	0	0	0	0	0	0	0	0	0	0	0	0	0	0	0	0
ureB; urease subunit beta [EC:3.5.1.5]	K01429	0	0	0	0	0	0	0	0	0	0	0	0	1	0	0	0	0	0	0	0	0	0	0	0	0	0	0	0	0	0	0	0	0	0	0	0	0	0	0	0	0	0	0	0	0	0	0	0
ureA; urease subunit gamma [EC:3.5.1.5]	K01430	0	0	0	0	0	0	0	0	0	0	0	0	1	0	0	0	0	0	0	0	0	0	0	0	0	0	0	0	0	0	0	0	0	0	0	0	0	0	0	0	0	0	0	0	0	0	0	0
tsdA; thiosulfate dehydrogenase [EC:1.8.2.2]	K19713	0	0	0	0	0	0	0	0	1	0	0	0	0	0	0	0	0	0	0	0	0	0	0	0	0	0	1	0	0	0	2	0	0	0	0	0	0	0	0	0	0	0	0	0	0	0	0	0
SUOX; sulfite oxidase [EC:1.8.3.1]	K00387	0	0	0	0	0	0	0	0	1	0	0	0	0	0	0	0	0	0	0	0	0	0	0	0	0	0	0	0	0	0	0	0	0	0	0	0	0	0	0	0	0	0	0	0	0	0	0	0
aprA; adenylylsulfate reductase, subunit A [EC:1.8.99.2]	K00394	0	0	0	0	0	0	0	0	0	0	0	3	0	0	0	2	0	0	2	0	1	1	2	0	0	0	0	0	0	0	1	0	0	1	0	0	0	0	0	0	0	0	0	1	2	0	0	0
aprB; adenylylsulfate reductase, subunit B [EC:1.8.99.2]	K00395	0	0	0	0	0	0	0	0	0	0	0	3	0	0	0	1	0	0	2	0	1	1	1	0	0	0	0	0	0	0	1	0	1	1	0	0	0	0	0	0	0	0	0	1	1	0	0	0
E1.8.2.1; sulfite dehydrogenase [EC:1.8.2.1]	K05301	0	0	0	0	0	0	0	0	0	0	0	0	0	0	0	0	0	0	0	0	0	0	0	0	0	0	0	0	0	0	0	0	0	0	0	0	0	0	0	0	0	0	0	0	0	0	0	0
phsA, psrA; thiosulfate reductase / polysulfide reductase chain A [EC:1.8.5.5]	K08352	0	0	0	0	0	0	0	0	0	0	0	2	0	0	3	3	0	0	0	0	0	0	0	0	0	0	0	0	1	0	0	0	0	0	0	0	0	0	0	0	0	1	1	0	0	0	0	0
ttrB; tetrathionate reductase subunit B	K08358	0	0	0	0	0	0	0	0	0	0	1	1	0	2	1	1	0	0	0	0	0	0	0	0	0	0	0	1	0	0	0	0	0	1	0	0	0	0	0	0	1	0	0	0	0	0	0	0
ttrC; tetrathionate reductase subunit C	K08359	0	0	0	0	0	0	0	0	0	0	0	0	0	0	0	0	0	0	0	0	0	0	0	0	0	0	0	1	0	0	0	0	0	0	0	0	0	0	0	0	0	0	0	0	0	0	0	0
dsrA; dissimilatory sulfite reductase alpha subunit [EC:1.8.99.5]	K11180	0	0	0	0	0	0	0	0	0	1	0	0	0	1	0	1	0	0	1	0	1	1	0	0	0	0	1	0	0	0	1	0	1	1	0	0	0	0	0	0	0	0	1	2	1	0	0	0
dsrB; dissimilatory sulfite reductase beta subunit [EC:1.8.99.5]	K11181	0	0	0	0	0	0	0	0	0	0	0	0	0	1	0	1	0	0	3	0	1	2	0	0	0	0	1	0	0	0	1	0	1	1	0	0	0	0	0	0	0	0	1	1	1	0	0	0
psrC; polysulfide reductase chain C	K16294	0	0	0	0	0	0	0	0	0	0	0	0	0	0	0	0	0	0	0	0	0	0	0	0	0	0	0	0	0	0	0	0	0	0	0	0	0	0	0	0	0	0	1	1	0	0	0	0
doxD; thiosulfate dehydrogenase [quinone] large subunit [EC:1.8.5.2]	K16937	0	0	0	1	0	0	0	0	0	0	0	0	0	0	0	0	0	0	0	0	0	0	0	0	0	0	1	0	0	0	0	1	0	0	0	0	0	1	0	0	0	0	0	0	0	0	0	0
asrA; anaerobic sulfite reductase subunit A	K16950	0	0	0	0	0	0	0	0	0	0	0	0	0	0	0	0	0	0	0	0	0	0	0	0	0	0	0	0	0	0	0	0	0	0	0	0	0	0	0	0	0	0	0	0	0	0	0	1
asrB; anaerobic sulfite reductase subunit B	K16951	0	0	0	0	0	0	0	0	0	0	0	0	0	0	0	0	0	0	0	0	0	0	0	0	1	0	0	0	0	0	0	0	0	0	0	0	0	0	0	0	0	0	0	0	0	0	0	0
ddhA; dimethylsulfide dehydrogenase subunit alpha [EC:1.8.2.4]	K16964	0	0	0	0	0	0	0	0	0	0	0	0	0	0	0	0	0	0	0	0	0	0	0	0	0	0	0	0	0	0	0	0	0	0	0	0	0	0	0	0	0	0	0	0	1	0	0	0
msmA; methanesulfonate monooxygenase subunit alpha [EC:1.14.13.111]	K16968	0	0	0	0	0	0	0	0	0	0	0	0	0	0	0	0	0	0	0	0	0	0	0	0	0	0	0	0	0	0	0	0	0	0	0	0	0	0	0	0	0	0	0	0	0	0	0	0
msmB; methanesulfonate monooxygenase subunit beta [EC:1.14.13.111]	K16969	0	0	0	0	0	0	0	0	0	0	0	0	0	0	0	0	0	0	0	0	0	0	0	0	0	0	0	0	0	0	0	0	0	0	0	0	0	0	0	0	0	0	0	0	0	0	0	0
sqr; sulfide:quinone oxidoreductase [EC:1.8.5.4]	K17218	0	0	0	0	0	0	0	0	2	0	0	0	1	3	0	0	0	0	0	0	0	0	0	0	0	0	0	0	1	1	3	1	0	0	0	0	0	0	1	2	0	1	0	1	0	0	0	0
soxA; L-cysteine S-thiosulfotransferase [EC:2.8.5.2]	K17222	0	0	0	0	0	0	0	0	0	0	0	0	0	0	0	0	0	0	0	0	0	0	0	0	0	0	0	0	0	0	0	0	0	0	0	0	0	0	0	0	0	0	0	0	0	0	0	0
soxX; L-cysteine S-thiosulfotransferase [EC:2.8.5.2]	K17223	0	0	0	0	0	0	0	0	0	0	0	0	0	0	0	0	0	0	0	0	0	0	0	0	0	0	0	0	0	0	0	0	0	0	0	0	0	0	0	0	0	0	0	0	0	0	0	0
soxB; S-sulfosulfanyl-L-cysteine sulfohydrolase [EC:3.1.6.20]	K17224	0	0	0	0	0	0	0	0	0	0	0	0	0	0	0	0	0	0	0	0	0	0	0	0	0	0	0	0	0	1	0	0	0	0	0	0	0	0	0	0	0	0	0	0	0	0	0	0
soxC; sulfane dehydrogenase subunit SoxC	K17225	0	0	0	0	0	0	0	1	0	0	0	0	0	0	0	0	0	0	0	0	0	0	0	0	0	0	0	0	0	0	0	0	0	0	0	0	0	0	0	0	0	0	0	0	0	0	0	0
soxY; sulfur-oxidizing protein SoxY	K17226	0	0	0	0	0	0	0	0	0	0	0	0	0	0	0	0	0	0	0	0	0	0	0	0	0	0	0	0	0	0	0	0	0	0	0	0	0	0	0	0	0	0	0	0	0	0	0	0
soxZ; sulfur-oxidizing protein SoxZ	K17227	0	0	0	0	0	0	0	0	0	0	0	0	0	0	0	0	0	0	0	0	0	0	0	0	0	0	0	0	0	0	0	0	0	0	0	0	0	0	0	0	0	0	0	0	0	0	0	0
sfnG; dimethylsulfone monooxygenase [EC:1.14.14.35]	K17228	0	0	0	0	0	0	0	0	0	0	0	0	0	0	0	0	0	0	0	0	0	0	0	0	0	0	0	0	0	0	0	0	0	0	0	0	0	0	0	0	0	0	0	0	0	0	0	0
fccB; sulfide dehydrogenase [flavocytochrome c] flavoprotein chain [EC:1.8.2.3]	K17229	0	0	0	0	0	0	0	0	0	0	0	0	0	0	0	0	0	0	0	0	0	0	0	0	0	0	0	0	0	0	0	0	0	0	0	0	0	0	0	0	0	0	0	0	0	0	0	0
fccA; cytochrome subunit of sulfide dehydrogenase	K17230	0	0	0	0	0	0	0	0	0	0	0	0	0	0	0	0	0	0	0	0	0	0	0	0	0	0	0	0	0	0	0	0	0	0	0	0	0	0	0	0	0	0	0	0	0	0	0	0
pmoA-amoA; methane/ammonia monooxygenase subunit A [EC:1.14.18.3 1.14.99.39]	K10944	0	0	0	0	0	0	0	0	0	0	0	0	0	0	0	0	0	0	0	0	0	0	0	0	0	0	0	0	0	0	0	0	0	0	0	0	0	0	0	0	0	0	0	0	0	0	0	0
pmoB-amoB; methane/ammonia monooxygenase subunit B	K10945	0	0	0	0	0	0	0	0	0	0	0	0	0	0	0	0	0	0	0	0	0	0	0	0	0	0	0	0	0	0	0	0	0	0	0	0	0	0	0	0	0	0	0	0	0	0	0	0
pmoC-amoC; methane/ammonia monooxygenase subunit C	K10946	0	0	0	0	0	0	0	0	0	0	0	0	0	0	0	0	0	0	0	0	0	0	0	0	0	0	0	0	0	0	0	0	0	0	0	0	0	0	0	0	0	0	0	0	0	0	0	0
rbcL; ribulose-bisphosphate carboxylase large chain [EC:4.1.1.39]	K01601	0	0	0	0	0	0	0	0	0	0	0	0	0	0	0	0	0	0	1	0	0	0	0	0	0	0	1	0	0	0	0	0	1	0	0	0	0	0	2	0	0	0	0	0	0	0	0	0
K18237; ribose 1,5-bisphosphate isomerase [EC:5.3.1.29]	K18237	0	0	0	0	0	0	0	0	0	0	0	0	0	0	0	0	0	0	0	0	0	0	0	0	1	0	0	0	0	0	0	0	0	0	0	0	0	0	0	0	0	0	0	0	0	0	0	0
ampp; AMP phosphorylase [EC:2.4.2.57]	K18931	0	0	0	0	0	0	0	0	0	0	0	0	0	0	0	0	0	0	0	0	0	0	0	0	0	0	0	0	0	0	0	0	0	0	0	0	0	0	0	0	0	0	0	0	0	0	0	0
sir; sulfite reductase (ferredoxin) [EC:1.8.7.1]	K00392	4	0	1	0	1	0	1	0	2	0	0	0	1	0	1	0	1	0	0	0	0	0	0	1	0	1	0	0	0	0	0	0	0	0	0	1	0	1	0	0	0	0	0	0	0	0	1	0
fqr; F420H(2)-dependent quinone reductase [EC:1.1.98.-]	K00540	5	1	4	1	6	0	1	1	5	0	1	0	4	1	0	1	0	0	2	1	1	13	14	1	0	1	14	0	2	1	4	0	2	0	0	8	0	2	1	1	1	2	0	1	1	0	6	1
cysNC; bifunctional enzyme CysN/CysC [EC:2.7.7.4 2.7.1.25]	K00955	0	1	1	1	1	1	1	1	0	1	0	0	0	0	0	0	0	0	0	0	0	0	0	0	0	1	0	0	1	0	0	0	0	0	0	0	0	0	1	1	0	2	0	0	0	1	2	0
cysD; sulfate adenylyltransferase subunit 2 [EC:2.7.7.4]	K00957	3	1	2	1	1	4	1	0	0	1	0	0	0	0	0	0	0	0	0	0	0	0	0	0	0	1	0	0	1	0	0	1	0	0	0	0	0	0	1	1	0	1	0	0	0	1	2	0
murU; N-acetyl-alpha-D-muramate 1-phosphate uridylyltransferase [EC:2.7.7.99]	K00992	0	0	0	0	0	0	0	0	0	0	0	0	0	0	0	0	0	0	0	0	0	0	0	0	0	0	0	0	0	0	0	0	0	0	0	0	0	0	0	0	0	0	0	0	0	0	0	0
murI; glutamate racemase [EC:5.1.1.3]	K01776	3	0	0	2	0	0	0	0	0	0	0	0	1	0	1	1	0	1	2	1	1	0	0	0	0	0	0	0	1	0	1	0	0	0	0	0	0	1	1	1	0	0	0	0	0	1	0	0
murQ; N-acetylmuramic acid 6-phosphate etherase [EC:4.2.1.126]	K07106	2	0	0	0	0	0	0	1	0	0	0	0	0	0	0	0	0	0	0	1	0	0	0	0	0	0	1	0	1	1	0	0	0	0	0	1	1	1	0	1	0	0	0	0	0	0	1	0
murEF; murE/murF fusion protein [EC:6.3.2.13 6.3.2.10]	K15792	0	0	0	1	0	0	0	1	0	0	0	0	0	0	0	2	0	0	0	0	1	0	0	0	0	0	0	0	0	0	0	0	0	0	0	0	0	0	0	0	0	0	0	1	0	0	0	0
E1.1.1.1, adh; alcohol dehydrogenase [EC:1.1.1.1]	K00001	0	3	4	0	6	1	1	0	2	0	1	0	0	1	2	1	1	0	1	2	0	0	1	0	0	1	3	0	1	0	0	0	2	1	1	1	3	0	0	1	0	0	1	2	0	0	0	0
AKR1A1, adh; alcohol dehydrogenase (NADP+) [EC:1.1.1.2]	K00002	2	0	0	0	0	0	0	0	0	0	0	0	0	0	0	0	0	0	0	0	0	0	0	1	0	0	0	0	0	0	0	0	0	0	0	0	1	0	0	0	0	0	0	0	0	0	0	0
hom; homoserine dehydrogenase [EC:1.1.1.3]	K00003	0	0	1	0	1	2	1	2	1	0	0	1	1	1	0	1	0	0	1	0	1	1	0	1	0	0	2	1	1	1	1	0	1	1	0	1	1	0	1	0	1	1	0	1	1	1	1	2
BDH, butB; (R,R)-butanediol dehydrogenase / meso-butanediol dehydrogenase / diacetyl reductase [EC:1.1.1.4 1.1.1.- 1.1.1.303]	K00004	0	0	1	0	1	0	0	0	0	0	0	1	0	0	0	0	1	0	0	0	0	0	0	1	0	0	0	0	0	0	5	0	1	2	0	0	1	0	0	0	1	0	0	5	2	0	0	0
gldA; glycerol dehydrogenase [EC:1.1.1.6]	K00005	0	0	1	0	0	0	0	0	0	0	0	0	1	0	0	0	0	0	0	0	0	1	2	0	0	1	2	0	0	0	2	0	1	0	0	1	0	0	0	0	0	0	1	1	0	0	1	0
GPD1; glycerol-3-phosphate dehydrogenase (NAD+) [EC:1.1.1.8]	K00006	0	0	0	0	0	0	0	0	0	0	0	0	0	0	0	0	0	0	0	0	0	0	0	0	0	0	0	0	0	0	0	0	0	0	0	0	0	0	0	0	0	0	0	0	0	0	0	0
dalD; D-arabinitol 4-dehydrogenase [EC:1.1.1.11]	K00007	0	0	0	0	0	0	0	0	0	0	0	0	0	0	0	0	0	0	0	0	0	0	0	0	0	0	0	0	0	0	0	0	0	0	0	0	0	0	0	0	0	0	0	0	0	0	0	0
SORD, gutB; L-iditol 2-dehydrogenase [EC:1.1.1.14]	K00008	0	1	1	0	2	4	0	1	0	3	1	2	0	0	0	1	4	0	3	5	0	3	5	11	2	4	4	0	0	0	3	0	6	1	1	3	16	3	1	2	1	0	3	4	2	0	5	1
mtlD; mannitol-1-phosphate 5-dehydrogenase [EC:1.1.1.17]	K00009	0	0	0	0	0	0	0	0	0	0	0	0	0	0	0	0	0	0	0	0	0	0	0	1	1	0	0	0	0	0	0	0	0	0	0	1	1	0	0	0	0	1	0	0	0	0	1	0
iolG; myo-inositol 2-dehydrogenase / D-chiro-inositol 1-dehydrogenase [EC:1.1.1.18 1.1.1.369]	K00010	0	3	0	0	0	1	0	0	0	1	0	0	0	0	0	0	0	0	0	2	0	0	1	1	0	2	3	0	0	0	0	0	0	0	1	1	9	0	1	0	0	0	1	1	0	0	1	0
AKR1B; aldehyde reductase [EC:1.1.1.21]	K00011	0	0	0	0	0	0	0	0	0	0	0	0	0	0	0	0	0	0	0	0	0	0	0	0	0	0	0	0	0	0	0	0	0	0	0	0	0	0	0	0	0	0	0	0	0	0	0	0
UGDH, ugd; UDPglucose 6-dehydrogenase [EC:1.1.1.22]	K00012	6	1	2	1	1	2	1	2	0	1	1	1	1	1	1	2	0	1	0	1	0	0	0	0	0	0	2	2	1	1	2	1	1	1	1	1	0	1	1	2	0	1	0	1	1	2	0	2
hisD; histidinol dehydrogenase [EC:1.1.1.23]	K00013	4	1	1	1	1	2	1	1	1	1	0	0	1	0	0	1	0	0	0	1	1	1	0	1	0	0	1	0	2	0	1	0	3	1	0	1	1	1	1	1	1	0	0	0	1	1	1	1
aroE; shikimate dehydrogenase [EC:1.1.1.25]	K00014	2	1	2	1	1	2	0	1	1	1	0	0	2	2	1	1	0	1	1	1	1	1	0	0	0	0	0	0	1	0	2	1	1	1	1	0	1	2	1	0	1	1	0	3	0	1	0	1
gyaR, GOR1; glyoxylate reductase [EC:1.1.1.26]	K00015	0	0	0	0	0	0	1	0	1	0	1	2	0	0	0	0	0	1	0	1	0	0	0	0	0	1	0	0	0	0	0	0	0	0	0	1	0	0	0	0	0	0	0	0	1	0	0	0
LDH, ldh; L-lactate dehydrogenase [EC:1.1.1.27]	K00016	0	3	1	0	2	0	0	0	1	0	0	0	0	0	0	0	0	0	1	0	0	0	1	0	0	0	0	0	0	0	0	0	0	0	0	0	0	0	0	0	0	0	0	0	0	0	0	0
hprA; glycerate dehydrogenase [EC:1.1.1.29]	K00018	1	0	1	0	0	1	0	0	1	0	0	0	0	0	0	0	0	0	0	0	0	0	0	0	0	1	0	0	0	0	1	0	2	0	0	1	1	0	0	1	0	0	0	0	0	0	2	0
E1.1.1.30, bdh; 3-hydroxybutyrate dehydrogenase [EC:1.1.1.30]	K00019	1	0	0	0	0	1	0	0	0	0	0	0	0	0	1	0	0	0	0	0	0	0	0	0	0	0	0	0	0	0	1	0	1	0	0	0	0	0	0	0	0	0	0	2	0	0	1	0
mmsB, HIBADH; 3-hydroxyisobutyrate dehydrogenase [EC:1.1.1.31]	K00020	0	3	1	0	1	2	0	0	2	1	0	4	1	0	1	0	0	0	2	0	0	1	1	0	0	0	0	0	0	0	2	0	5	4	0	0	2	0	1	1	0	0	0	1	0	0	1	2
HMGCR; hydroxymethylglutaryl-CoA reductase (NADPH) [EC:1.1.1.34]	K00021	0	0	0	0	0	0	0	0	0	0	0	0	0	0	0	0	0	0	0	1	0	0	0	0	0	0	0	0	1	0	0	0	0	0	0	0	0	0	1	0	0	0	0	0	0	0	0	0
phbB; acetoacetyl-CoA reductase [EC:1.1.1.36]	K00023	0	0	0	0	0	0	0	1	0	0	0	0	0	0	0	0	0	0	0	0	0	0	0	0	0	0	0	0	0	0	0	1	1	0	0	0	0	0	0	0	0	1	0	0	0	0	1	0
mdh; malate dehydrogenase [EC:1.1.1.37]	K00024	3	0	1	1	1	1	1	0	1	1	0	0	0	1	1	1	1	0	0	1	0	2	1	0	0	0	0	1	2	0	1	1	1	1	0	1	0	1	1	1	0	1	0	1	1	1	1	0
MDH1; malate dehydrogenase [EC:1.1.1.37]	K00025	0	0	0	0	0	0	0	0	0	0	0	0	0	0	0	0	0	0	0	0	0	0	0	0	0	0	0	0	0	0	0	0	0	0	0	0	0	0	0	0	0	0	0	0	0	0	0	0
MDH2; malate dehydrogenase [EC:1.1.1.37]	K00026	0	0	0	0	0	0	0	0	0	0	0	0	0	0	0	0	0	0	0	0	0	0	0	0	0	0	0	0	0	0	0	0	0	0	0	0	0	0	0	0	0	0	0	0	0	0	0	0
ME2, sfcA, maeA; malate dehydrogenase (oxaloacetate-decarboxylating) [EC:1.1.1.38]	K00027	0	0	0	0	0	0	0	0	2	0	0	0	1	0	0	1	1	0	0	0	0	1	1	0	0	0	0	1	0	1	0	0	0	0	0	1	0	0	1	0	1	0	1	0	0	0	0	0
E1.1.1.39; malate dehydrogenase (decarboxylating) [EC:1.1.1.39]	K00028	0	0	0	0	0	2	0	0	0	0	0	0	0	0	0	0	0	0	0	0	0	0	0	0	0	0	0	0	0	0	0	0	0	0	0	0	0	0	0	0	0	0	0	0	0	0	0	0
E1.1.1.40, maeB; malate dehydrogenase (oxaloacetate-decarboxylating)(NADP+) [EC:1.1.1.40]	K00029	3	0	0	0	0	2	0	2	0	1	0	0	0	0	0	0	0	0	0	0	0	0	0	1	0	1	0	0	2	0	0	1	0	1	0	0	1	2	0	1	0	1	0	0	0	0	0	0
IDH3; isocitrate dehydrogenase (NAD+) [EC:1.1.1.41]	K00030	0	0	0	1	0	0	0	2	0	0	0	1	0	0	0	0	0	0	0	0	0	0	1	0	0	0	1	1	0	0	0	0	0	0	0	1	0	0	0	0	0	0	0	1	0	1	0	1
IDH1, IDH2, icd; isocitrate dehydrogenase [EC:1.1.1.42]	K00031	4	0	0	3	1	1	2	1	1	1	0	1	0	0	0	1	1	0	0	1	1	0	0	0	1	0	0	0	1	1	1	1	0	0	0	0	1	1	1	2	0	1	0	0	1	0	1	0
E1.1.1.43; phosphogluconate 2-dehydrogenase [EC:1.1.1.43]	K00032	0	0	0	0	0	0	0	0	0	0	0	0	0	0	0	0	0	0	0	0	0	0	0	0	0	0	0	0	0	0	0	0	0	0	0	0	0	0	0	0	0	0	0	0	0	0	0	0
PGD, gnd, gntZ; 6-phosphogluconate dehydrogenase [EC:1.1.1.44 1.1.1.343]	K00033	0	0	1	0	2	1	1	0	2	4	1	0	1	0	0	0	0	0	0	1	0	1	1	0	0	0	2	0	0	0	1	0	1	1	0	1	1	2	1	1	0	0	0	1	0	0	1	0
gdh; glucose 1-dehydrogenase [EC:1.1.1.47]	K00034	0	0	1	0	3	2	0	0	3	0	0	0	0	0	0	0	1	0	0	2	0	0	0	1	0	0	0	0	0	0	0	0	1	0	1	1	0	0	0	0	0	0	0	1	0	0	1	0
gal; D-galactose 1-dehydrogenase [EC:1.1.1.48]	K00035	0	0	0	0	0	0	0	0	0	0	0	0	0	0	0	0	0	0	0	0	0	0	0	0	0	0	0	0	0	0	0	0	0	0	0	0	0	0	0	0	0	0	0	0	0	0	0	0
G6PD, zwf; glucose-6-phosphate 1-dehydrogenase [EC:1.1.1.49 1.1.1.363]	K00036	0	0	1	0	2	1	1	0	1	1	1	0	1	0	1	0	0	0	0	1	0	1	1	1	1	0	0	0	0	0	1	0	1	1	1	1	1	0	1	1	0	0	0	1	0	0	1	0
E1.1.1.53; 3alpha(or 20beta)-hydroxysteroid dehydrogenase [EC:1.1.1.53]	K00038	0	0	0	0	0	0	0	0	0	0	0	0	0	0	0	0	0	0	0	0	0	0	0	0	0	0	0	0	0	0	0	0	0	2	0	0	0	0	1	0	0	0	0	0	1	0	0	0
rbtD; ribitol 2-dehydrogenase [EC:1.1.1.56]	K00039	0	0	0	0	0	0	0	0	0	0	0	0	0	0	0	0	0	0	0	0	0	0	0	0	0	0	0	0	0	0	0	0	0	0	0	0	0	0	0	0	0	0	0	0	0	0	0	0
uxuB; fructuronate reductase [EC:1.1.1.57]	K00040	0	0	0	0	0	0	0	0	0	0	0	0	0	0	0	0	0	0	0	0	0	0	0	1	0	0	0	0	0	0	0	0	0	0	0	0	0	0	0	0	0	0	0	0	0	0	0	0
uxaB; tagaturonate reductase [EC:1.1.1.58]	K00041	3	0	0	0	0	0	0	0	0	0	0	0	0	0	0	0	0	0	0	0	0	1	1	0	0	0	1	0	0	0	0	0	0	0	0	0	0	0	0	0	0	0	0	0	0	0	0	0
garR, glxR; 2-hydroxy-3-oxopropionate reductase [EC:1.1.1.60]	K00042	0	1	0	0	2	0	0	0	0	0	0	2	1	0	0	0	0	0	0	0	0	0	0	0	0	0	0	0	0	0	1	0	1	3	0	1	2	0	0	0	0	0	0	0	0	0	2	1
gbd; 4-hydroxybutyrate dehydrogenase [EC:1.1.1.61]	K00043	0	0	0	0	0	0	0	0	0	0	0	0	0	0	0	0	0	0	0	0	0	0	0	0	0	0	0	0	0	0	0	0	0	0	0	0	0	0	0	0	0	0	0	0	0	0	0	0
E1.1.1.67, mtlK; mannitol 2-dehydrogenase [EC:1.1.1.67]	K00045	0	0	0	0	0	0	0	0	0	0	0	0	0	0	0	0	0	0	0	0	0	0	0	0	0	0	0	0	0	0	0	0	0	0	0	0	0	1	1	0	0	0	0	0	0	0	0	0
idnO; gluconate 5-dehydrogenase [EC:1.1.1.69]	K00046	4	2	2	0	4	5	0	1	5	0	1	3	0	1	3	0	2	0	0	1	0	1	1	1	0	0	2	0	0	0	4	0	2	1	0	1	2	0	0	1	3	0	1	3	0	0	2	0
fucO; lactaldehyde reductase [EC:1.1.1.77]	K00048	0	0	0	0	0	0	0	0	0	0	0	0	0	0	0	0	0	0	0	0	0	0	0	0	0	0	0	0	0	0	0	0	0	0	0	0	1	0	0	0	0	0	0	0	0	0	0	0
GRHPR; glyoxylate/hydroxypyruvate reductase [EC:1.1.1.79 1.1.1.81]	K00049	0	0	0	0	0	0	0	0	0	0	0	0	0	0	0	0	0	0	0	0	0	0	0	0	0	0	0	0	0	0	0	0	0	0	0	0	0	0	0	0	0	0	0	0	0	0	0	0
ttuD; hydroxypyruvate reductase [EC:1.1.1.81]	K00050	0	0	1	0	1	0	0	0	1	2	0	1	0	1	0	0	0	2	0	0	1	1	1	1	0	0	1	1	0	0	1	0	2	0	0	0	0	0	0	0	0	0	0	1	1	0	0	0
leuB, IMDH; 3-isopropylmalate dehydrogenase [EC:1.1.1.85]	K00052	4	1	0	0	1	1	1	2	1	2	0	4	1	1	0	2	1	0	1	1	0	0	0	2	2	0	1	0	2	1	2	0	0	1	0	0	1	2	0	2	1	1	0	1	1	2	1	1
ilvC; ketol-acid reductoisomerase [EC:1.1.1.86]	K00053	2	1	1	0	1	2	1	0	1	1	0	0	1	1	0	1	1	0	0	0	1	1	0	1	0	1	1	0	1	0	1	0	1	1	0	0	1	1	2	1	1	0	0	1	1	1	1	1
mvaA; hydroxymethylglutaryl-CoA reductase [EC:1.1.1.88]	K00054	4	0	0	1	0	0	0	0	0	1	0	0	0	0	0	0	0	0	0	0	0	0	0	0	0	0	0	0	0	0	0	1	0	0	0	0	0	0	0	2	0	0	0	0	0	0	2	0
E1.1.1.90; aryl-alcohol dehydrogenase [EC:1.1.1.90]	K00055	0	0	0	0	0	0	0	0	0	0	0	0	0	0	0	0	0	0	0	0	0	0	0	0	0	0	0	0	0	0	0	0	0	0	0	0	0	0	0	0	0	0	0	0	0	0	0	0
gpsA; glycerol-3-phosphate dehydrogenase (NAD(P)+) [EC:1.1.1.94]	K00057	8	0	1	2	0	1	1	1	1	2	0	1	0	1	0	1	1	0	0	1	1	0	0	1	1	0	1	1	1	1	0	1	1	1	0	1	1	1	1	1	1	1	0	1	0	1	1	0
serA, PHGDH; D-3-phosphoglycerate dehydrogenase / 2-oxoglutarate reductase [EC:1.1.1.95 1.1.1.399]	K00058	8	4	4	1	3	3	2	1	3	7	1	0	2	2	1	3	3	0	4	5	1	4	6	4	0	1	15	1	1	0	7	2	5	2	0	0	4	0	1	3	2	2	3	5	2	2	5	1
fabG; 3-oxoacyl-[acyl-carrier protein] reductase [EC:1.1.1.100]	K00059	10	1	4	2	3	5	5	6	9	12	1	9	1	4	6	5	3	3	13	3	2	6	7	17	6	5	16	8	3	5	16	5	17	10	0	3	15	1	6	4	5	8	9	15	7	1	6	2
tdh; threonine 3-dehydrogenase [EC:1.1.1.103]	K00060	0	0	1	0	1	1	1	0	1	1	0	2	0	0	0	0	0	1	0	1	0	1	3	0	1	1	0	0	0	0	0	0	0	0	0	0	1	1	0	1	0	0	0	1	0	0	1	0
E1.1.1.122; D-threo-aldose 1-dehydrogenase [EC:1.1.1.122]	K00064	0	0	0	0	0	1	0	0	0	0	0	0	0	0	0	0	0	0	0	0	0	0	0	2	1	0	0	0	0	0	0	0	0	0	0	0	0	0	0	0	0	0	0	0	0	0	0	0
kduD; 2-dehydro-3-deoxy-D-gluconate 5-dehydrogenase [EC:1.1.1.127]	K00065	0	0	1	0	0	0	0	0	0	0	0	1	1	0	4	0	0	0	3	0	0	1	1	0	1	0	3	0	0	0	7	0	9	7	0	1	1	0	0	1	9	0	1	1	1	0	2	0
algD; GDP-mannose 6-dehydrogenase [EC:1.1.1.132]	K00066	1	0	0	0	0	0	0	0	0	1	1	0	0	0	0	0	1	0	0	0	0	0	0	0	0	0	1	0	0	0	0	0	0	0	0	0	0	0	0	0	1	0	0	0	0	0	0	0
rfbD, rmlD; dTDP-4-dehydrorhamnose reductase [EC:1.1.1.133]	K00067	4	0	1	0	0	0	1	3	2	1	0	0	1	0	0	2	0	0	1	3	1	1	2	1	1	1	3	2	1	1	3	1	2	2	0	3	1	2	2	4	0	1	1	2	1	0	3	0
srlD; sorbitol-6-phosphate 2-dehydrogenase [EC:1.1.1.140]	K00068	0	0	0	0	0	0	0	0	0	0	1	0	0	0	0	0	0	0	0	1	0	0	1	1	0	0	0	0	0	0	1	0	0	0	0	0	1	0	0	0	0	0	0	0	0	0	1	0
HPGD; 15-hydroxyprostaglandin dehydrogenase (NAD) [EC:1.1.1.141]	K00069	0	0	0	0	0	0	0	0	0	0	0	0	0	0	0	0	0	0	0	0	0	0	0	0	0	0	0	0	0	0	0	0	0	0	0	0	0	0	0	0	0	0	0	0	0	0	0	0
allD; ureidoglycolate dehydrogenase (NAD+) [EC:1.1.1.350]	K00073	0	0	0	0	0	0	0	0	1	0	0	0	0	0	0	0	0	0	0	0	0	0	0	0	0	0	0	0	0	0	0	0	0	0	0	0	0	0	0	0	0	0	0	2	0	0	0	0
paaH, hbd, fadB, mmgB; 3-hydroxybutyryl-CoA dehydrogenase [EC:1.1.1.157]	K00074	3	1	0	1	2	0	0	3	0	2	1	3	0	3	6	0	0	1	4	0	1	0	2	0	0	1	2	2	1	0	6	0	13	4	1	0	1	1	2	0	7	0	0	7	1	0	0	1
murB; UDP-N-acetylmuramate dehydrogenase [EC:1.3.1.98]	K00075	3	0	1	1	1	0	1	1	1	2	0	0	1	1	2	1	0	1	0	0	1	1	1	1	0	0	1	1	0	1	1	1	1	0	0	1	1	1	0	1	0	1	1	1	1	1	3	0
hdhA; 7-alpha-hydroxysteroid dehydrogenase [EC:1.1.1.159]	K00076	0	0	0	0	0	0	0	0	0	0	0	0	0	0	0	0	0	0	0	0	0	0	1	0	0	0	0	0	0	0	0	0	0	3	0	0	0	0	0	0	1	0	0	0	0	0	0	0
panE, apbA; 2-dehydropantoate 2-reductase [EC:1.1.1.169]	K00077	0	0	1	0	2	0	0	1	1	1	0	2	0	2	0	2	0	0	4	1	0	0	0	0	0	0	0	1	0	0	4	1	4	0	1	0	1	0	0	1	0	1	3	1	2	0	0	0
CBR1; carbonyl reductase 1 [EC:1.1.1.184 1.1.1.189 1.1.1.197]	K00079	0	0	0	0	0	0	0	0	0	0	0	0	0	0	0	0	0	0	0	0	0	0	0	0	0	0	0	0	0	0	0	0	0	0	0	0	0	0	0	0	0	0	0	0	0	0	0	0
CBR2; carbonyl reductase 2 [EC:1.1.1.184]	K00081	0	0	0	0	0	0	0	0	0	0	0	0	0	0	0	0	0	0	0	0	0	0	0	0	0	0	0	0	0	0	0	0	0	0	0	0	0	0	0	0	0	0	0	0	0	0	0	0
ribD2; 5-amino-6-(5-phosphoribosylamino)uracil reductase [EC:1.1.1.193]	K00082	0	0	0	0	0	0	0	0	0	0	0	0	1	0	0	0	0	0	0	0	0	0	0	0	0	0	0	0	0	0	0	0	0	0	0	0	0	0	0	0	0	0	0	0	0	0	0	0
dhaT; 1,3-propanediol dehydrogenase [EC:1.1.1.202]	K00086	0	0	0	0	0	0	0	0	0	0	0	0	0	0	0	0	0	0	0	0	0	0	0	0	0	0	1	0	0	0	0	0	0	0	0	0	0	0	0	0	0	0	0	0	0	0	0	0
ygeS, xdhA; xanthine dehydrogenase molybdenum-binding subunit [EC:1.17.1.4]	K00087	0	0	0	0	0	0	0	1	0	2	0	0	0	0	2	0	0	2	2	0	0	0	0	0	0	0	0	1	0	0	4	0	6	0	1	0	2	0	0	0	0	1	1	1	0	0	0	0
IMPDH, guaB; IMP dehydrogenase [EC:1.1.1.205]	K00088	4	1	1	1	1	1	1	1	0	1	0	0	1	1	3	1	0	0	3	1	1	2	2	2	2	0	1	1	2	1	3	1	1	1	1	1	2	1	2	0	2	1	1	2	0	0	1	1
ghrB; glyoxylate/hydroxypyruvate/2-ketogluconate reductase [EC:1.1.1.79 1.1.1.81 1.1.1.215]	K00090	0	0	0	0	0	0	0	0	0	0	0	0	0	0	0	0	0	0	0	0	0	0	0	0	0	0	0	0	0	0	0	0	0	0	0	0	0	0	0	0	0	0	0	0	0	0	0	0
E1.1.1.219; dihydroflavonol-4-reductase [EC:1.1.1.219]	K00091	1	0	1	0	1	0	1	0	0	5	0	1	0	0	1	0	0	2	0	0	0	0	1	1	0	1	1	0	0	0	0	0	1	0	0	0	1	1	0	1	1	1	0	0	1	0	0	0
E1.1.1.251, gatD; galactitol-1-phosphate 5-dehydrogenase [EC:1.1.1.251]	K00094	0	0	0	0	0	0	0	0	0	0	0	0	0	0	0	0	0	0	0	0	0	0	0	0	0	0	0	0	0	0	0	0	0	0	0	0	0	0	0	0	0	0	0	0	0	0	0	0
araM, egsA; glycerol-1-phosphate dehydrogenase [NAD(P)+] [EC:1.1.1.261]	K00096	0	0	0	1	0	0	0	1	0	0	0	0	0	2	0	0	0	0	0	0	0	0	0	0	0	2	0	0	0	0	1	0	0	0	0	0	1	0	0	0	0	0	0	0	0	0	0	0
pdxA; 4-hydroxythreonine-4-phosphate dehydrogenase [EC:1.1.1.262]	K00097	3	2	1	1	2	1	1	1	2	1	0	0	1	2	0	1	0	0	0	0	1	1	1	1	0	0	0	1	0	0	1	1	2	0	0	1	1	1	0	3	0	1	0	1	1	1	2	2
idnD; L-idonate 5-dehydrogenase [EC:1.1.1.264]	K00098	0	0	0	0	0	0	0	0	0	0	0	0	0	0	0	0	0	0	0	0	0	0	0	0	0	0	0	0	0	0	0	0	0	0	0	0	0	0	0	0	0	0	0	0	0	0	0	0
dxr; 1-deoxy-D-xylulose-5-phosphate reductoisomerase [EC:1.1.1.267]	K00099	0	1	1	0	1	1	1	2	1	0	0	0	1	1	0	1	0	0	1	2	2	0	0	1	0	0	1	1	1	1	1	1	1	1	0	1	1	1	1	1	1	1	1	1	1	1	1	1
bdhAB; butanol dehydrogenase [EC:1.1.1.-]	K00100	3	1	1	0	3	1	0	1	2	2	0	1	0	0	0	3	0	1	0	0	0	0	0	2	0	1	0	0	0	0	4	1	0	1	1	0	6	1	2	1	1	0	0	4	1	0	0	0
lldD; L-lactate dehydrogenase (cytochrome) [EC:1.1.2.3]	K00101	0	0	0	0	0	0	0	0	1	0	0	1	0	0	0	0	0	0	0	0	0	0	0	0	0	0	0	0	0	0	0	0	0	0	0	0	0	0	0	0	0	0	0	0	0	0	0	0
LDHD, dld; D-lactate dehydrogenase (cytochrome) [EC:1.1.2.4]	K00102	0	0	0	0	0	0	1	1	1	1	0	0	0	0	0	0	0	0	0	0	0	1	0	0	0	0	0	0	0	0	0	0	0	0	0	0	0	0	0	0	0	0	1	2	1	1	0	0
GULO; L-gulonolactone oxidase [EC:1.1.3.8]	K00103	0	0	0	0	0	0	0	0	0	0	0	0	0	0	0	0	0	0	0	0	0	0	0	0	0	0	0	0	0	0	0	0	0	0	0	0	0	0	0	0	0	0	0	0	0	0	0	0
glcD; glycolate oxidase [EC:1.1.3.15]	K00104	2	2	1	0	1	1	0	0	2	2	0	1	1	2	3	1	0	2	4	0	1	2	3	1	2	1	1	1	0	0	7	0	8	3	3	0	1	0	1	0	1	0	4	5	2	0	0	1
E1.1.3.21; alpha-glycerophosphate oxidase [EC:1.1.3.21]	K00105	0	0	0	0	0	0	0	0	0	0	0	0	0	0	0	0	0	0	0	0	0	0	0	0	0	0	0	0	0	0	0	0	0	0	0	0	0	0	0	0	0	0	0	0	0	0	0	0
XDH; xanthine dehydrogenase/oxidase [EC:1.17.1.4 1.17.3.2]	K00106	0	0	0	0	0	0	0	0	0	0	0	0	0	0	0	0	0	0	0	0	0	0	0	0	0	0	0	0	0	0	0	1	0	0	0	0	0	0	0	0	0	1	0	0	0	0	0	0
betA, CHDH; choline dehydrogenase [EC:1.1.99.1]	K00108	0	0	0	0	0	0	0	0	0	1	0	0	0	0	0	0	0	0	0	0	0	0	0	0	0	0	0	0	0	0	0	0	0	0	0	0	0	0	1	0	0	0	0	0	0	0	0	0
L2HGDH; 2-hydroxyglutarate dehydrogenase [EC:1.1.99.2]	K00109	0	0	0	0	0	0	0	0	0	0	0	0	0	0	0	0	0	0	0	0	0	0	0	0	0	0	0	0	0	0	0	0	0	0	0	1	0	0	0	0	0	0	0	0	0	0	1	0
glpA, glpD; glycerol-3-phosphate dehydrogenase [EC:1.1.5.3]	K00111	0	0	0	1	1	0	0	2	1	2	0	1	1	1	1	0	0	0	3	0	0	0	0	1	0	0	1	0	1	1	3	0	2	0	0	0	1	1	1	2	0	0	1	1	0	0	1	0
glpB; glycerol-3-phosphate dehydrogenase subunit B [EC:1.1.5.3]	K00112	0	0	0	0	0	0	0	0	0	0	0	1	0	0	1	0	0	0	2	0	0	0	0	0	0	0	0	0	0	0	0	0	1	0	0	0	0	0	0	0	0	0	1	0	1	0	0	0
glpC; glycerol-3-phosphate dehydrogenase subunit C [EC:1.1.5.3]	K00113	0	0	0	0	0	0	0	0	0	1	0	0	0	0	0	0	0	0	0	0	0	0	0	0	0	0	0	0	0	0	1	0	4	1	0	0	0	0	0	0	1	0	0	0	0	0	0	0
exaA; alcohol dehydrogenase (cytochrome c) [EC:1.1.2.8]	K00114	0	0	0	0	0	0	0	2	0	0	0	0	0	0	0	0	0	0	0	0	0	0	0	0	0	0	0	0	0	0	0	0	0	0	0	0	0	0	0	0	0	0	0	0	0	0	0	0
mqo; malate dehydrogenase (quinone) [EC:1.1.5.4]	K00116	0	0	1	0	0	1	0	0	0	0	0	0	0	0	0	0	0	0	0	0	0	0	0	0	0	0	0	0	0	0	0	0	0	0	0	0	0	0	0	0	0	0	0	0	0	0	0	0
gcd; quinoprotein glucose dehydrogenase [EC:1.1.5.2]	K00117	0	3	0	0	1	0	0	5	4	0	0	0	0	0	0	0	0	0	0	0	0	0	0	0	0	0	0	0	0	0	0	0	0	0	0	0	0	0	0	0	0	0	0	0	0	0	0	0
gfo; glucose-fructose oxidoreductase [EC:1.1.99.28]	K00118	0	1	0	0	1	1	0	0	0	0	0	0	0	0	0	0	0	0	0	2	0	0	0	0	0	1	0	0	0	0	0	0	0	0	0	0	0	0	0	1	0	0	0	0	0	0	0	0
frmA, ADH5, adhC; S-(hydroxymethyl)glutathione dehydrogenase / alcohol dehydrogenase [EC:1.1.1.284 1.1.1.1]	K00121	0	0	0	0	0	0	0	1	1	2	0	0	0	0	0	0	0	0	0	0	0	0	0	0	0	1	0	1	0	0	2	0	0	5	0	0	0	0	0	0	1	0	0	0	0	0	1	0
FDH; formate dehydrogenase [EC:1.17.1.9]	K00122	0	0	0	0	1	0	0	0	1	2	0	0	0	0	0	0	0	0	0	0	0	0	0	1	0	0	0	0	0	0	0	0	0	1	0	0	0	0	0	0	0	0	0	0	0	0	0	0
fdoG, fdhF, fdwA; formate dehydrogenase major subunit [EC:1.17.1.9]	K00123	0	0	2	0	0	1	0	2	2	2	2	0	0	6	5	1	0	1	5	1	5	4	4	4	1	0	3	1	0	0	5	2	8	8	2	0	0	3	1	0	5	2	5	7	2	0	0	2
fdoH, fdsB; formate dehydrogenase iron-sulfur subunit	K00124	0	0	0	0	0	1	0	0	0	0	0	0	0	1	0	0	0	0	1	1	2	2	4	4	0	0	1	0	0	0	3	0	2	0	2	0	0	0	2	0	2	0	2	1	0	0	0	1
fdhB; formate dehydrogenase (coenzyme F420) beta subunit [EC:1.17.98.3 1.8.98.6]	K00125	0	0	0	0	0	0	0	0	0	0	0	0	0	0	1	0	0	0	2	0	0	0	0	0	0	0	0	0	0	0	1	0	0	0	1	0	0	0	0	0	0	0	0	0	0	0	0	0
fdsD; formate dehydrogenase subunit delta [EC:1.17.1.9]	K00126	0	0	0	0	0	0	0	0	0	0	0	0	0	0	0	0	0	0	0	0	0	0	0	0	0	0	0	0	0	0	0	0	0	0	0	0	0	0	0	0	0	0	0	0	0	0	0	0
fdoI, fdsG; formate dehydrogenase subunit gamma	K00127	0	0	0	0	0	0	0	0	0	0	0	0	0	0	0	0	0	0	0	1	0	0	0	0	0	0	0	0	0	0	0	0	0	1	0	0	0	0	2	0	1	0	1	0	0	0	0	1
ALDH; aldehyde dehydrogenase (NAD+) [EC:1.2.1.3]	K00128	10	1	3	4	8	3	1	3	1	3	0	0	1	0	0	0	0	1	0	2	0	0	0	1	0	0	0	0	1	0	0	0	0	0	0	0	0	1	2	2	0	1	0	0	0	0	1	0
E1.2.1.5; aldehyde dehydrogenase (NAD(P)+) [EC:1.2.1.5]	K00129	0	0	0	0	0	0	0	0	0	0	0	0	0	0	0	1	0	0	0	0	0	0	0	0	0	0	0	0	0	0	0	0	0	0	0	0	0	0	0	0	0	0	0	0	0	0	1	0
betB, gbsA; betaine-aldehyde dehydrogenase [EC:1.2.1.8]	K00130	0	0	0	0	1	0	0	0	0	2	0	0	0	0	0	0	0	0	0	0	0	0	0	0	0	0	0	0	0	0	0	0	0	0	0	0	0	0	2	0	0	0	0	0	0	0	0	0
gapN; glyceraldehyde-3-phosphate dehydrogenase (NADP+) [EC:1.2.1.9]	K00131	3	0	0	0	0	0	0	0	0	0	0	0	0	0	0	0	0	0	1	0	0	0	0	0	0	0	1	2	0	1	0	0	0	0	0	0	0	1	0	0	0	0	0	0	0	0	0	0
E1.2.1.10; acetaldehyde dehydrogenase (acetylating) [EC:1.2.1.10]	K00132	0	0	0	0	0	0	0	0	0	0	0	0	0	0	0	0	0	0	0	0	0	0	0	0	0	0	0	0	0	0	0	0	0	0	0	0	0	0	0	0	0	0	0	0	0	0	0	0
asd; aspartate-semialdehyde dehydrogenase [EC:1.2.1.11]	K00133	5	1	1	1	0	1	1	3	1	0	0	0	1	1	0	1	1	0	0	0	0	0	1	0	1	0	0	0	1	0	1	1	1	1	0	0	1	0	1	1	1	1	0	1	0	1	2	1
GAPDH, gapA; glyceraldehyde 3-phosphate dehydrogenase [EC:1.2.1.12]	K00134	10	0	1	1	1	2	1	1	1	1	0	1	1	1	2	3	1	0	2	1	2	1	2	1	0	0	0	1	3	2	2	4	1	5	1	0	1	1	1	2	1	6	0	2	1	1	1	0
gabD; succinate-semialdehyde dehydrogenase / glutarate-semialdehyde dehydrogenase [EC:1.2.1.16 1.2.1.79 1.2.1.20]	K00135	5	0	0	1	0	1	0	2	1	1	0	0	0	2	0	0	0	0	1	0	0	2	0	0	0	0	1	0	2	2	0	0	0	0	0	0	0	0	3	2	0	1	0	1	0	0	0	0
prr; aminobutyraldehyde dehydrogenase [EC:1.2.1.19]	K00137	0	0	0	0	0	0	0	0	0	0	0	0	0	0	0	0	0	0	0	0	0	0	0	0	0	0	0	0	0	0	0	0	0	0	0	0	0	0	0	0	0	0	0	0	0	0	0	0
aldB; aldehyde dehydrogenase [EC:1.2.1.-]	K00138	1	0	0	0	0	0	0	0	0	0	0	0	0	0	0	0	0	0	0	0	0	0	0	0	0	0	0	0	0	0	0	0	0	0	0	0	0	0	0	0	0	0	0	0	0	0	0	0
mmsA, iolA, ALDH6A1; malonate-semialdehyde dehydrogenase (acetylating) / methylmalonate-semialdehyde dehydrogenase [EC:1.2.1.18 1.2.1.27]	K00140	1	2	0	0	0	0	0	1	0	0	0	0	0	0	0	0	0	0	0	1	0	1	1	0	0	0	0	0	0	1	0	0	2	0	0	0	0	0	1	0	0	0	1	1	0	0	1	0
xylC; benzaldehyde dehydrogenase (NAD) [EC:1.2.1.28]	K00141	0	0	0	0	0	0	0	0	0	0	0	0	0	0	0	0	0	0	0	0	0	0	0	0	0	0	0	0	0	0	0	0	0	0	0	0	0	0	0	0	0	0	0	0	0	0	0	0
argC; N-acetyl-gamma-glutamyl-phosphate reductase [EC:1.2.1.38]	K00145	3	0	1	1	1	1	1	0	1	1	1	1	0	1	0	1	0	1	0	0	1	0	2	0	0	1	1	0	0	0	1	0	1	1	1	0	1	0	1	1	1	1	1	1	0	1	1	0
feaB; phenylacetaldehyde dehydrogenase [EC:1.2.1.39]	K00146	0	0	0	0	1	0	0	1	0	0	0	0	0	0	0	0	0	0	0	0	0	0	0	0	0	0	0	0	0	0	0	0	0	0	0	0	0	0	0	0	0	0	0	0	0	0	0	0
proA; glutamate-5-semialdehyde dehydrogenase [EC:1.2.1.41]	K00147	1	0	1	2	1	1	1	1	1	1	0	0	1	2	1	1	0	0	1	1	1	0	1	2	1	2	1	0	1	0	1	0	1	2	0	1	1	1	1	1	0	0	2	1	1	0	1	1
fdhA; glutathione-independent formaldehyde dehydrogenase [EC:1.2.1.46]	K00148	1	0	0	0	0	0	0	0	0	0	0	0	0	0	0	0	0	0	0	0	0	0	0	0	0	0	0	0	0	0	0	0	0	0	0	0	0	0	0	0	0	0	0	0	0	0	0	0
gap2; glyceraldehyde-3-phosphate dehydrogenase (NAD(P)) [EC:1.2.1.59]	K00150	0	0	0	0	0	0	0	0	0	0	0	0	1	0	0	0	1	0	0	0	0	0	0	0	0	0	0	0	1	1	0	0	0	0	0	0	1	0	0	0	0	0	0	0	0	0	0	0
hpaE, hpcC; 5-carboxymethyl-2-hydroxymuconic-semialdehyde dehydrogenase [EC:1.2.1.60]	K00151	0	0	0	0	1	0	0	0	0	0	0	0	0	0	0	0	0	0	0	0	0	0	0	0	0	0	0	0	0	0	0	0	0	0	0	0	0	0	0	0	0	0	0	0	0	0	0	0
E1.1.1.306; S-(hydroxymethyl)mycothiol dehydrogenase [EC:1.1.1.306]	K00153	0	0	0	0	0	0	0	0	0	0	0	0	0	0	0	0	0	0	0	0	0	0	0	0	1	0	0	0	0	0	0	0	1	0	0	0	1	0	0	0	0	0	0	0	0	0	1	0
E1.2.1.68; coniferyl-aldehyde dehydrogenase [EC:1.2.1.68]	K00154	0	0	0	0	0	0	0	0	0	0	0	0	0	0	0	0	0	0	0	0	0	0	0	0	0	0	0	0	0	0	0	0	0	0	0	0	0	0	0	0	0	0	0	0	0	0	0	0
poxB; pyruvate dehydrogenase (quinone) [EC:1.2.5.1]	K00156	0	0	0	0	0	0	0	0	0	0	0	0	0	0	0	0	0	0	0	0	0	0	0	0	0	0	0	0	0	0	0	0	0	0	0	0	0	0	0	0	0	0	0	0	0	0	0	0
E1.2.3.3, poxL; pyruvate oxidase [EC:1.2.3.3]	K00158	0	0	0	0	0	0	0	0	0	0	0	0	0	0	0	0	0	0	0	0	0	0	0	0	0	0	0	0	0	0	0	0	0	0	0	0	0	0	0	0	0	0	0	0	0	0	0	0
PDHA, pdhA; pyruvate dehydrogenase E1 component alpha subunit [EC:1.2.4.1]	K00161	3	0	0	1	0	1	1	2	1	4	0	1	1	0	0	2	4	0	3	0	0	1	0	1	1	4	1	0	0	0	3	0	2	2	0	0	4	1	1	1	0	0	2	2	1	0	2	0
PDHB, pdhB; pyruvate dehydrogenase E1 component beta subunit [EC:1.2.4.1]	K00162	2	0	0	1	0	1	1	0	0	1	1	1	2	0	0	3	3	0	4	0	0	0	0	1	2	4	1	0	0	0	3	0	4	1	0	1	4	1	1	1	0	0	2	2	0	0	1	0
aceE; pyruvate dehydrogenase E1 component [EC:1.2.4.1]	K00163	0	0	1	0	1	0	1	0	2	0	0	0	0	0	0	0	2	0	0	0	0	2	0	1	1	0	1	0	2	0	0	0	0	0	0	0	1	0	1	0	0	0	0	0	0	0	1	0
OGDH, sucA; 2-oxoglutarate dehydrogenase E1 component [EC:1.2.4.2]	K00164	4	1	0	1	1	2	0	1	0	2	1	1	0	1	0	0	0	0	0	0	0	0	2	0	0	0	1	0	0	0	0	1	0	0	0	0	0	0	1	1	0	1	0	0	0	0	1	0
BCKDHA, bkdA1; 2-oxoisovalerate dehydrogenase E1 component alpha subunit [EC:1.2.4.4]	K00166	0	0	0	0	0	1	0	2	0	2	0	0	0	0	0	0	0	0	0	0	0	0	0	0	0	1	0	0	0	0	0	0	0	0	0	0	0	0	0	0	0	0	0	0	0	0	1	0
BCKDHB, bkdA2; 2-oxoisovalerate dehydrogenase E1 component beta subunit [EC:1.2.4.4]	K00167	0	0	0	0	0	0	0	1	0	2	0	0	0	0	0	0	0	0	0	0	0	0	0	0	1	0	0	0	0	0	0	0	0	0	0	0	0	0	0	0	0	0	0	0	1	0	1	0
porA; pyruvate ferredoxin oxidoreductase alpha subunit [EC:1.2.7.1]	K00169	0	0	0	0	0	0	3	1	1	1	0	2	0	1	3	0	0	0	3	1	0	0	0	0	0	0	0	1	0	0	1	0	3	2	0	1	0	0	0	0	1	0	0	0	1	2	1	0
porB; pyruvate ferredoxin oxidoreductase beta subunit [EC:1.2.7.1]	K00170	0	0	0	0	0	0	3	1	1	2	0	2	0	1	0	0	0	0	3	1	0	0	0	0	0	0	0	1	0	0	0	0	3	2	0	1	0	0	0	0	1	0	0	0	1	1	1	1
porD; pyruvate ferredoxin oxidoreductase delta subunit [EC:1.2.7.1]	K00171	0	0	0	0	0	0	2	0	0	0	0	1	0	0	1	0	0	0	0	1	0	0	0	0	0	0	0	1	0	0	0	0	1	1	0	1	0	0	0	0	1	0	0	0	0	1	1	0
porG; pyruvate ferredoxin oxidoreductase gamma subunit [EC:1.2.7.1]	K00172	0	0	0	0	0	0	3	0	0	0	0	1	0	2	1	0	0	0	0	1	0	0	0	0	0	0	0	1	0	0	0	0	3	1	0	1	0	0	0	0	0	0	1	0	1	1	1	0
korA, oorA, oforA; 2-oxoglutarate/2-oxoacid ferredoxin oxidoreductase subunit alpha [EC:1.2.7.3 1.2.7.11]	K00174	1	0	1	0	1	1	0	2	2	3	1	1	0	5	4	2	0	2	3	1	1	2	1	1	0	0	0	2	1	4	5	3	7	3	2	1	0	4	0	3	2	2	4	7	4	1	1	2
korB, oorB, oforB; 2-oxoglutarate/2-oxoacid ferredoxin oxidoreductase subunit beta [EC:1.2.7.3 1.2.7.11]	K00175	1	0	1	0	1	1	0	2	1	2	0	0	0	3	3	2	1	2	4	1	1	1	1	1	0	0	0	2	1	3	5	2	7	3	0	1	0	4	0	2	2	2	4	7	4	1	1	2
korD, oorD; 2-oxoglutarate ferredoxin oxidoreductase subunit delta [EC:1.2.7.3]	K00176	0	0	0	0	0	0	0	0	0	1	0	1	0	3	0	1	0	1	3	0	0	0	0	0	0	0	0	2	0	2	2	1	5	2	1	0	1	0	0	1	2	1	2	1	4	1	0	1
korC, oorC; 2-oxoglutarate ferredoxin oxidoreductase subunit gamma [EC:1.2.7.3]	K00177	0	0	0	0	0	0	0	0	0	0	0	1	0	2	4	1	0	1	6	0	1	0	0	0	0	0	0	2	0	2	3	1	8	2	1	1	0	1	0	1	2	0	2	6	4	1	1	0
iorA; indolepyruvate ferredoxin oxidoreductase, alpha subunit [EC:1.2.7.8]	K00179	0	0	0	0	0	0	0	0	0	1	0	2	0	1	2	2	0	0	5	0	1	0	0	0	0	1	0	2	0	0	6	1	8	1	2	0	1	1	1	0	1	1	1	4	0	0	0	0
iorB; indolepyruvate ferredoxin oxidoreductase, beta subunit [EC:1.2.7.8]	K00180	0	0	0	0	0	0	0	0	0	0	0	1	0	1	3	1	0	0	1	0	1	0	0	0	0	1	0	1	0	0	6	1	6	1	1	0	1	1	1	0	1	1	1	3	1	0	0	0
K00183; prokaryotic molybdopterin-containing oxidoreductase family, molybdopterin binding subunit	K00183	0	0	0	0	0	0	0	0	0	0	0	0	0	0	0	0	0	0	1	0	0	0	0	0	0	0	0	0	0	0	0	0	0	3	0	0	0	0	0	0	3	0	0	1	0	0	0	0
K00184; prokaryotic molybdopterin-containing oxidoreductase family, iron-sulfur binding subunit	K00184	2	2	2	1	2	1	0	1	0	3	0	2	0	3	2	2	0	1	3	1	1	5	3	0	0	1	0	0	2	0	2	1	0	3	0	0	0	2	0	1	3	3	1	5	2	0	3	2
K00185; prokaryotic molybdopterin-containing oxidoreductase family, membrane subunit	K00185	3	0	1	1	1	1	0	0	0	3	0	3	0	4	1	4	0	2	4	1	2	2	3	0	0	0	0	0	2	0	3	1	0	1	0	0	0	2	0	1	1	4	1	4	2	0	2	1
vorA; 2-oxoisovalerate ferredoxin oxidoreductase, alpha subunit [EC:1.2.7.7]	K00186	0	0	0	0	0	0	0	1	0	1	0	1	0	0	0	0	0	0	0	1	0	0	0	0	1	0	0	0	1	0	0	0	0	0	0	0	1	0	0	0	0	0	0	0	0	0	0	0
vorB; 2-oxoisovalerate ferredoxin oxidoreductase, beta subunit [EC:1.2.7.7]	K00187	0	0	0	0	0	0	0	1	0	2	0	1	0	0	0	0	0	0	2	0	0	0	0	0	0	0	0	0	2	0	0	0	1	0	0	0	1	0	0	0	0	0	0	0	0	0	0	0
vorD; 2-oxoisovalerate ferredoxin oxidoreductase, delta subunit [EC:1.2.7.7]	K00188	0	0	0	0	0	0	0	0	0	0	0	0	0	0	0	0	0	0	0	0	0	0	0	0	1	0	0	0	0	0	0	0	0	0	0	0	0	0	0	0	0	0	0	0	0	0	0	0
vorG; 2-oxoisovalerate ferredoxin oxidoreductase, gamma subunit [EC:1.2.7.7]	K00189	0	0	0	0	0	0	0	0	0	0	0	0	0	1	0	0	0	0	0	1	0	0	0	0	0	0	0	0	0	0	0	0	0	0	0	0	0	0	0	0	0	0	1	0	0	0	0	0
cdhA; acetyl-CoA decarbonylase/synthase complex subunit alpha [EC:1.2.7.4]	K00192	0	0	0	0	0	0	0	0	0	0	0	0	0	0	0	0	0	0	0	0	0	0	0	0	0	0	0	0	0	0	0	0	0	0	0	0	0	0	0	0	1	0	0	0	0	0	0	0
cdhC; acetyl-CoA decarbonylase/synthase complex subunit beta [EC:2.3.1.-]	K00193	0	0	0	0	0	0	0	0	0	0	0	0	0	0	0	0	0	0	0	0	0	0	0	0	0	0	0	0	0	0	0	0	0	1	0	0	0	0	0	0	3	0	0	0	0	0	0	0
cdhD, acsD; acetyl-CoA decarbonylase/synthase complex subunit delta [EC:2.1.1.245]	K00194	0	0	0	0	0	0	0	0	0	0	0	0	0	0	0	0	0	0	0	1	0	2	2	1	0	1	3	1	0	0	1	0	1	1	2	1	0	0	0	0	0	0	0	1	1	0	1	0
cdhB; acetyl-CoA decarbonylase/synthase complex subunit epsilon	K00195	0	0	0	0	0	0	0	0	0	0	0	0	0	0	0	0	0	0	0	0	0	0	0	0	0	0	0	0	0	0	0	0	0	0	0	0	0	0	0	0	1	0	0	0	0	0	0	0
cooF; anaerobic carbon-monoxide dehydrogenase iron sulfur subunit	K00196	0	0	0	0	0	0	0	0	0	0	0	0	0	0	0	0	0	0	1	0	0	0	0	1	2	0	0	0	0	0	1	0	0	1	0	0	1	0	0	0	2	0	0	1	0	0	0	0
cdhE, acsC; acetyl-CoA decarbonylase/synthase complex subunit gamma [EC:2.1.1.245]	K00197	0	0	0	0	0	0	0	0	0	0	0	0	0	1	1	1	0	1	1	2	0	3	2	1	1	1	2	1	0	0	2	0	1	1	1	1	0	0	0	0	1	0	1	3	1	1	2	0
cooS, acsA; anaerobic carbon-monoxide dehydrogenase catalytic subunit [EC:1.2.7.4]	K00198	0	0	0	0	0	0	0	0	0	1	0	1	0	2	2	3	0	0	1	1	0	2	2	2	1	0	1	1	0	0	2	0	1	1	0	1	0	0	0	0	0	0	0	2	1	0	3	0
fwdA, fmdA; formylmethanofuran dehydrogenase subunit A [EC:1.2.7.12]	K00200	0	0	1	0	2	0	0	0	2	0	0	0	0	0	0	0	0	0	0	0	0	0	0	0	0	0	0	0	0	0	0	0	0	0	0	0	0	0	0	0	0	0	0	0	0	0	0	0
fwdB, fmdB; formylmethanofuran dehydrogenase subunit B [EC:1.2.7.12]	K00201	0	0	2	0	1	0	0	0	2	0	0	0	0	0	0	0	0	0	0	0	0	0	0	0	0	0	0	0	0	0	0	0	0	0	0	0	0	0	0	0	0	0	0	0	0	0	0	0
fwdC, fmdC; formylmethanofuran dehydrogenase subunit C [EC:1.2.7.12]	K00202	0	0	1	0	1	0	0	0	1	0	0	0	0	0	0	0	0	0	0	0	0	0	0	0	1	0	0	0	0	0	0	0	0	0	0	0	0	0	0	0	0	0	0	0	0	0	0	0
fwdD, fmdD; formylmethanofuran dehydrogenase subunit D [EC:1.2.7.12]	K00203	0	0	0	0	1	0	0	0	1	0	0	0	0	0	0	0	0	0	0	0	0	0	0	0	0	0	0	0	0	0	0	0	0	0	0	0	0	0	0	0	0	0	0	0	0	0	0	0
fwdF, fmdF; 4Fe-4S ferredoxin	K00205	0	0	0	0	0	0	0	0	0	0	0	0	0	0	0	0	0	0	0	0	0	0	0	0	0	0	0	0	0	0	0	0	0	0	0	0	0	0	0	0	0	0	0	0	0	0	0	0
DPYD; dihydropyrimidine dehydrogenase (NADP+) [EC:1.3.1.2]	K00207	0	0	0	0	0	0	0	0	0	0	0	0	0	0	0	0	0	0	0	0	0	0	0	0	0	0	0	0	0	0	0	0	0	0	0	0	0	0	0	0	0	0	0	0	0	0	0	0
fabI; enoyl-[acyl-carrier protein] reductase I [EC:1.3.1.9 1.3.1.10]	K00208	1	1	1	0	2	1	1	1	3	0	0	0	1	0	0	1	0	0	0	0	0	1	0	0	0	1	3	0	0	0	0	1	0	0	0	0	0	0	1	1	0	0	0	1	0	0	0	0
fabV, ter; enoyl-[acyl-carrier protein] reductase / trans-2-enoyl-CoA reductase (NAD+) [EC:1.3.1.9 1.3.1.44]	K00209	2	1	0	0	0	1	0	0	0	0	0	0	0	0	0	0	0	0	0	0	0	0	0	0	0	0	0	0	0	0	0	0	0	0	0	0	0	0	0	0	0	0	0	0	0	0	1	0
E1.3.1.12; prephenate dehydrogenase [EC:1.3.1.12]	K00210	0	0	0	0	0	0	0	0	0	0	0	0	0	0	0	0	0	0	1	0	0	0	0	0	0	0	0	0	0	0	0	0	1	0	0	0	0	1	0	0	0	0	0	0	0	0	1	0
TYR1; prephenate dehydrogenase (NADP+) [EC:1.3.1.13]	K00211	0	0	0	0	0	0	0	0	0	0	0	0	0	0	0	0	0	0	0	0	0	0	0	0	0	0	0	0	0	0	0	0	0	0	0	0	0	0	0	0	0	0	0	0	0	0	0	0
DHCR7; 7-dehydrocholesterol reductase [EC:1.3.1.21]	K00213	0	0	0	0	0	0	0	0	0	1	0	0	0	0	0	0	0	0	0	0	0	0	0	0	0	0	0	0	0	0	0	0	0	0	0	0	0	0	0	0	0	0	0	0	0	0	0	0
BLVRA, bvdR; biliverdin reductase [EC:1.3.1.24]	K00214	0	0	0	0	0	0	0	0	0	0	0	0	0	0	0	0	0	0	0	0	0	0	0	0	0	0	0	0	0	0	0	0	0	0	0	0	0	0	0	0	0	0	0	0	0	0	0	0
dapB; 4-hydroxy-tetrahydrodipicolinate reductase [EC:1.17.1.8]	K00215	3	1	1	1	1	1	1	0	1	1	0	0	1	1	1	2	0	0	1	0	1	1	0	2	0	0	0	0	0	2	3	1	0	4	2	2	1	0	1	1	1	1	1	4	2	1	1	1
entA; 2,3-dihydro-2,3-dihydroxybenzoate dehydrogenase [EC:1.3.1.28]	K00216	0	0	0	0	0	0	0	0	0	0	0	0	0	0	0	0	0	0	0	0	0	0	0	0	0	0	0	0	0	0	0	0	0	0	0	0	0	0	0	0	0	0	0	0	0	0	0	0
E1.3.1.32; maleylacetate reductase [EC:1.3.1.32]	K00217	0	0	0	0	0	0	0	0	0	0	0	0	0	0	0	0	0	0	0	0	0	0	0	0	0	0	0	0	0	0	0	0	0	0	0	0	0	0	0	0	0	0	0	0	0	0	0	0
por; protochlorophyllide reductase [EC:1.3.1.33]	K00218	0	0	0	0	0	0	0	0	0	0	0	0	3	0	0	0	0	0	0	0	0	0	0	0	0	0	0	0	0	0	0	0	0	0	0	0	0	0	0	0	0	0	0	0	0	0	0	0
fadH; 2,4-dienoyl-CoA reductase (NADPH2) [EC:1.3.1.34]	K00219	0	0	0	0	0	0	0	0	0	2	0	0	0	0	0	0	0	2	2	0	1	0	0	1	0	0	0	1	0	0	6	1	2	6	0	0	0	0	0	0	9	0	1	3	1	0	0	1
tyrC; cyclohexadieny/prephenate dehydrogenase [EC:1.3.1.43 1.3.1.12]	K00220	0	1	0	0	0	1	1	0	0	0	0	0	0	0	0	0	0	0	0	0	0	0	0	0	0	0	0	0	0	0	0	0	0	0	0	1	0	0	0	0	0	0	0	0	0	0	0	0
TM7SF2, ERG24; Delta14-sterol reductase [EC:1.3.1.70]	K00222	0	0	0	1	0	0	0	0	0	0	0	0	0	0	0	0	0	0	0	0	0	0	0	0	0	0	0	0	0	0	0	0	0	1	0	0	0	0	0	0	0	0	0	0	0	0	0	0
ERG4; Delta24(24(1))-sterol reductase [EC:1.3.1.71]	K00223	0	0	0	0	0	0	0	0	0	1	0	0	0	0	0	0	0	0	0	0	0	0	0	0	0	0	0	0	0	0	0	0	0	0	0	0	0	0	0	0	0	0	0	0	0	0	0	0
GLDH; L-galactono-1,4-lactone dehydrogenase [EC:1.3.2.3]	K00225	0	0	0	0	0	0	0	0	0	0	0	0	0	0	0	0	0	0	0	0	0	0	0	0	0	0	0	0	0	0	0	0	0	0	0	0	0	0	0	0	0	0	0	0	0	0	0	0
pyrD; dihydroorotate dehydrogenase (fumarate) [EC:1.3.98.1]	K00226	0	0	0	0	1	0	0	0	1	1	0	0	1	0	0	0	0	0	0	0	0	2	0	2	0	0	1	1	1	1	0	3	2	0	1	0	2	0	0	3	0	2	0	0	0	0	1	0
SC5DL, ERG3; Delta7-sterol 5-desaturase [EC:1.14.19.20]	K00227	0	0	2	1	2	0	0	0	0	0	0	0	0	0	0	0	0	0	0	0	0	0	0	0	0	0	0	0	0	0	0	0	0	0	0	0	0	0	0	0	0	0	0	0	0	0	0	0
CPOX, hemF; coproporphyrinogen III oxidase [EC:1.3.3.3]	K00228	6	0	1	1	0	1	0	0	0	0	0	0	1	0	0	0	0	0	0	0	0	0	0	0	0	0	0	0	0	0	0	0	0	0	0	0	0	0	0	0	0	0	0	0	0	0	0	0
hemG; menaquinone-dependent protoporphyrinogen oxidase [EC:1.3.5.3]	K00230	1	0	0	0	0	0	0	0	0	0	0	0	0	0	0	0	0	0	0	0	0	0	0	0	0	0	0	0	0	0	2	0	0	1	3	0	1	0	0	1	0	0	0	0	0	0	0	2
PPOX, hemY; protoporphyrinogen/coproporphyrinogen III oxidase [EC:1.3.3.4 1.3.3.15]	K00231	0	0	1	1	1	1	1	1	1	1	0	0	0	2	0	1	0	0	1	0	0	1	1	1	0	0	1	0	1	0	0	0	0	0	0	0	0	1	0	0	0	0	0	0	0	0	0	0
E1.3.3.6, ACOX1, ACOX3; acyl-CoA oxidase [EC:1.3.3.6]	K00232	2	0	0	0	0	1	0	0	0	0	0	0	0	0	0	0	0	0	0	0	0	0	0	0	0	0	0	0	0	0	0	0	0	0	0	0	0	0	0	0	0	0	0	0	0	0	0	0
SDHA, SDH1; succinate dehydrogenase (ubiquinone) flavoprotein subunit [EC:1.3.5.1]	K00234	0	0	0	0	0	0	0	0	0	0	0	0	0	0	0	0	0	0	0	0	0	0	0	0	0	0	0	0	0	0	0	0	0	0	0	0	0	0	0	0	0	0	0	0	0	0	0	0
SDHB, SDH2; succinate dehydrogenase (ubiquinone) iron-sulfur subunit [EC:1.3.5.1]	K00235	0	0	0	0	0	0	0	0	0	0	0	0	0	0	0	0	0	0	0	0	0	0	0	0	0	0	0	0	0	0	0	0	0	0	0	0	0	0	0	0	0	0	0	0	0	0	0	0
SDHC, SDH3; succinate dehydrogenase (ubiquinone) cytochrome b560 subunit	K00236	0	0	0	0	0	0	0	0	0	0	0	0	0	0	0	0	0	0	0	0	0	0	0	0	0	0	0	0	0	0	0	0	0	0	0	0	0	0	0	0	0	0	0	0	0	0	0	0
sdhA, frdA; succinate dehydrogenase / fumarate reductase, flavoprotein subunit [EC:1.3.5.1 1.3.5.4]	K00239	1	1	1	1	2	2	3	1	1	2	0	2	0	1	3	2	0	0	2	0	1	1	0	0	1	0	3	3	0	0	6	1	5	1	1	0	0	1	1	1	1	0	4	2	1	0	2	1
sdhB, frdB; succinate dehydrogenase / fumarate reductase, iron-sulfur subunit [EC:1.3.5.1 1.3.5.4]	K00240	2	0	1	2	1	2	2	1	1	1	0	2	0	1	1	1	0	0	2	0	1	1	1	0	0	0	0	1	0	0	0	1	4	0	0	0	0	0	1	2	0	0	3	0	1	0	3	0
sdhC, frdC; succinate dehydrogenase / fumarate reductase, cytochrome b subunit	K00241	2	2	1	1	1	1	2	0	1	0	0	1	0	1	0	1	0	1	0	0	1	0	0	0	0	0	1	0	0	0	0	1	1	0	0	0	0	1	0	1	0	0	3	0	0	0	1	0
sdhD, frdD; succinate dehydrogenase / fumarate reductase, membrane anchor subunit	K00242	0	0	0	0	0	0	0	0	0	0	0	0	0	0	0	0	0	0	0	0	0	0	0	0	0	0	1	0	0	0	0	0	1	0	0	0	0	0	0	0	0	0	1	0	0	0	0	0
K00243; uncharacterized protein	K00243	2	1	0	0	0	1	0	0	0	0	0	0	0	0	0	1	0	0	1	0	0	0	0	0	0	0	0	0	1	0	0	0	0	0	0	0	0	0	0	1	0	1	0	0	0	1	0	0
frdA; fumarate reductase flavoprotein subunit [EC:1.3.5.4]	K00244	0	0	0	0	1	0	0	0	2	0	0	1	0	0	1	0	0	0	0	0	0	0	1	1	0	0	1	0	2	1	0	0	2	0	0	0	0	0	0	0	0	0	1	0	0	0	0	0
frdB; fumarate reductase iron-sulfur subunit [EC:1.3.5.4]	K00245	0	0	0	0	0	0	0	0	0	0	0	2	0	0	1	0	0	0	0	0	0	0	0	0	0	0	0	0	1	1	1	0	2	0	0	0	0	0	0	0	0	0	0	1	1	0	0	0
frdC; fumarate reductase subunit C	K00246	0	0	0	0	0	0	0	0	0	0	0	0	0	0	0	0	0	0	0	0	0	0	0	0	0	0	0	0	1	1	0	0	2	0	0	0	0	0	0	0	0	0	0	0	0	0	0	0
frdD; fumarate reductase subunit D	K00247	0	0	0	0	0	0	0	0	0	0	0	0	0	0	0	0	0	0	0	0	0	0	0	0	0	0	0	0	0	0	0	0	0	0	0	0	0	0	0	0	0	0	0	0	0	0	0	0
ACADS, bcd; butyryl-CoA dehydrogenase [EC:1.3.8.1]	K00248	0	0	0	3	0	0	0	3	0	1	0	3	0	0	6	1	0	0	1	1	0	0	0	0	0	1	0	0	0	1	5	0	9	4	0	0	0	0	0	0	3	0	2	4	2	1	0	2
ACADM, acd; acyl-CoA dehydrogenase [EC:1.3.8.7]	K00249	0	0	0	6	2	1	0	0	0	5	0	3	0	0	3	0	0	1	5	3	0	0	0	0	0	0	0	1	2	0	15	1	6	0	0	0	0	0	1	0	1	1	3	14	4	0	0	2
GCDH, gcdH; glutaryl-CoA dehydrogenase [EC:1.3.8.6]	K00252	2	0	0	0	2	0	0	1	0	1	0	0	0	0	0	0	0	0	0	0	0	0	0	0	0	0	0	0	1	1	0	1	0	0	0	0	0	0	1	0	0	2	0	0	0	0	0	0
IVD, ivd; isovaleryl-CoA dehydrogenase [EC:1.3.8.4]	K00253	0	0	0	1	0	0	0	0	0	0	0	0	0	0	1	0	0	0	0	1	0	0	0	0	0	0	0	0	0	0	0	0	0	0	0	0	0	0	0	0	1	0	1	0	0	0	0	0
DHODH, pyrD; dihydroorotate dehydrogenase [EC:1.3.5.2]	K00254	3	1	0	1	1	1	0	0	0	0	0	0	1	0	0	1	0	0	0	0	0	0	0	1	0	0	0	0	0	0	0	0	0	0	1	0	0	0	0	0	0	1	0	0	0	1	0	0
ACADL; long-chain-acyl-CoA dehydrogenase [EC:1.3.8.8]	K00255	0	0	0	0	0	0	0	0	0	0	0	0	0	0	0	0	0	0	0	0	0	0	0	0	0	0	0	0	0	0	0	0	0	0	0	0	0	0	0	0	0	0	0	0	0	0	0	0
E1.3.99.16; isoquinoline 1-oxidoreductase [EC:1.3.99.16]	K00256	0	0	0	0	0	0	0	0	0	0	0	1	0	0	0	0	0	0	0	1	0	0	0	0	0	0	0	1	0	0	0	0	0	0	0	1	0	0	0	2	0	0	0	0	0	0	1	0
mbtN, fadE14; acyl-ACP dehydrogenase [EC:1.3.99.-]	K00257	1	0	0	7	1	1	0	4	0	6	0	2	0	2	5	0	1	4	6	1	0	1	1	1	1	1	2	3	1	3	14	0	11	15	0	0	1	0	3	0	10	0	3	13	3	0	1	3
ald; alanine dehydrogenase [EC:1.4.1.1]	K00259	5	1	1	1	1	1	1	1	1	1	0	1	0	0	2	1	1	2	0	1	0	1	1	1	1	0	1	1	2	1	1	1	3	0	0	0	0	1	1	2	0	1	0	1	0	0	1	0
gudB, rocG; glutamate dehydrogenase [EC:1.4.1.2]	K00260	0	0	0	0	0	0	0	0	0	0	0	0	0	0	0	0	0	0	0	0	0	0	0	0	0	0	0	0	0	0	0	0	0	0	0	0	0	0	0	0	0	0	0	0	0	0	0	0
GLUD1_2, gdhA; glutamate dehydrogenase (NAD(P)+) [EC:1.4.1.3]	K00261	0	1	1	2	1	3	4	0	0	0	0	0	0	0	0	1	1	0	0	0	1	0	0	4	0	0	0	2	1	0	0	0	0	1	1	0	0	0	0	0	0	0	0	1	0	0	0	0
E1.4.1.4, gdhA; glutamate dehydrogenase (NADP+) [EC:1.4.1.4]	K00262	5	0	0	0	0	0	2	1	1	0	0	2	0	1	0	1	1	0	4	1	0	2	2	0	0	2	0	0	1	0	2	2	0	0	0	1	2	2	0	1	0	3	1	0	0	0	4	0
E1.4.1.9; leucine dehydrogenase [EC:1.4.1.9]	K00263	1	0	0	1	0	0	0	3	0	1	0	0	0	0	0	0	0	0	1	0	0	0	0	0	0	0	0	0	1	1	0	0	0	0	0	0	0	0	0	0	0	0	0	0	0	0	0	0
GLT1; glutamate synthase (NADH) [EC:1.4.1.14]	K00264	0	0	0	0	0	1	0	0	0	0	0	0	0	0	0	0	1	0	0	0	0	0	0	0	1	0	0	0	0	0	0	0	0	0	0	0	0	0	0	0	0	0	0	0	0	0	0	0
gltB; glutamate synthase (NADPH) large chain [EC:1.4.1.13]	K00265	0	0	1	1	1	1	1	0	1	4	0	0	0	2	0	3	1	0	1	1	0	2	0	0	1	0	1	0	2	0	0	0	0	0	0	0	2	1	1	2	0	0	0	2	0	1	2	0
gltD; glutamate synthase (NADPH) small chain [EC:1.4.1.13]	K00266	2	0	0	0	0	1	2	0	0	2	0	0	0	0	1	1	1	0	1	2	1	2	1	0	1	1	2	1	1	2	1	2	2	1	1	1	3	4	1	3	0	1	1	2	1	2	2	1
vdh; valine dehydrogenase (NAD+) [EC:1.4.1.23]	K00271	0	0	0	0	0	0	0	0	0	0	0	0	0	0	0	0	0	0	0	0	0	0	0	0	0	0	0	0	0	0	0	0	0	0	0	0	0	0	1	0	0	0	0	0	0	0	0	0
DAO, aao; D-amino-acid oxidase [EC:1.4.3.3]	K00273	0	0	0	0	0	0	0	0	0	0	0	0	1	0	0	0	0	0	0	0	1	0	0	0	0	0	0	0	0	0	0	0	0	0	0	0	0	0	0	0	0	0	0	0	0	0	0	0
MAO, aofH; monoamine oxidase [EC:1.4.3.4]	K00274	1	0	0	0	0	1	0	0	0	1	0	0	1	0	0	0	0	0	0	0	0	0	0	0	0	0	0	0	0	0	0	0	0	0	0	0	0	0	0	0	0	0	0	0	0	0	0	0
pdxH, PNPO; pyridoxamine 5'-phosphate oxidase [EC:1.4.3.5]	K00275	3	0	1	1	1	2	0	1	1	1	0	0	1	0	0	0	0	0	0	0	0	0	0	0	0	0	0	0	0	0	0	0	0	0	0	0	0	1	1	1	0	0	0	0	0	0	1	0
AOC3, AOC2, tynA; primary-amine oxidase [EC:1.4.3.21]	K00276	0	0	0	0	1	0	0	0	0	0	0	0	0	0	0	0	0	0	0	0	0	0	0	0	0	0	0	0	0	0	0	0	0	0	0	0	0	0	0	0	0	0	0	0	0	0	0	0
nadB; L-aspartate oxidase [EC:1.4.3.16]	K00278	2	1	1	1	1	1	1	0	1	3	0	0	1	1	0	1	0	0	0	0	1	1	1	1	1	1	1	3	1	0	2	1	0	2	0	1	1	0	1	0	1	1	2	2	2	0	1	1
GLDC, gcvP; glycine dehydrogenase [EC:1.4.4.2]	K00281	6	0	0	1	2	1	0	3	0	2	0	0	1	0	0	0	1	0	0	0	0	0	0	0	0	0	0	0	0	0	0	1	0	0	0	0	0	1	2	1	0	1	0	0	0	0	0	0
gcvPA; glycine dehydrogenase subunit 1 [EC:1.4.4.2]	K00282	0	0	1	0	0	0	1	0	1	0	1	1	0	0	0	0	0	1	0	0	0	0	1	1	0	0	1	2	1	1	1	0	2	0	1	0	1	0	0	0	0	0	0	2	1	1	1	0
gcvPB; glycine dehydrogenase subunit 2 [EC:1.4.4.2]	K00283	0	0	1	0	0	1	1	0	1	0	1	2	0	0	0	0	0	0	0	0	0	0	1	1	0	0	0	2	1	1	0	0	2	0	3	0	1	0	0	0	0	0	1	1	1	1	0	0
GLU, gltS; glutamate synthase (ferredoxin) [EC:1.4.7.1]	K00284	3	1	1	1	0	1	1	1	1	1	0	0	1	0	0	0	0	0	0	0	0	2	0	0	1	0	1	0	2	0	0	0	0	0	0	0	1	0	0	0	0	0	0	0	0	1	1	0
dadA; D-amino-acid dehydrogenase [EC:1.4.5.1]	K00285	0	1	0	0	1	0	0	1	1	0	0	0	0	0	0	0	0	0	0	0	0	0	0	1	0	0	0	0	0	0	0	0	0	0	0	0	0	0	0	0	0	0	0	1	0	0	0	0
proC; pyrroline-5-carboxylate reductase [EC:1.5.1.2]	K00286	2	1	1	1	1	1	1	0	1	1	0	0	1	1	0	1	0	1	0	1	1	1	0	1	0	0	2	0	1	0	1	0	1	1	1	1	1	1	0	3	1	1	0	1	1	1	2	1
DHFR, folA; dihydrofolate reductase [EC:1.5.1.3]	K00287	4	1	0	0	1	1	0	0	0	0	0	0	0	0	0	1	0	0	0	0	0	0	0	0	0	0	0	0	0	0	0	1	0	0	0	0	0	1	0	1	0	1	0	0	0	0	0	0
MTHFD; methylenetetrahydrofolate dehydrogenase (NADP+) / methenyltetrahydrofolate cyclohydrolase / formyltetrahydrofolate synthetase [EC:1.5.1.5 3.5.4.9 6.3.4.3]	K00288	0	0	0	0	0	0	0	0	0	0	0	0	0	0	0	0	0	0	0	0	0	0	0	0	0	0	0	0	0	0	0	0	0	0	0	0	0	0	0	0	0	0	0	0	0	0	0	0
LYS1; saccharopine dehydrogenase (NAD+, L-lysine forming) [EC:1.5.1.7]	K00290	0	0	0	1	0	0	1	0	0	0	0	1	0	0	0	0	0	0	0	0	0	0	0	0	0	0	0	0	0	0	1	0	0	0	1	0	1	0	0	0	0	0	0	1	0	0	1	0
LYS9; saccharopine dehydrogenase (NADP+, L-glutamate forming) [EC:1.5.1.10]	K00293	0	0	0	0	0	0	0	0	0	0	0	0	0	0	0	0	0	0	0	0	0	0	0	0	0	0	0	1	1	1	0	2	0	0	0	0	0	1	0	1	0	1	0	0	0	0	0	0
E1.2.1.88; 1-pyrroline-5-carboxylate dehydrogenase [EC:1.2.1.88]	K00294	4	0	0	0	0	0	0	1	0	1	0	0	0	0	0	0	0	0	0	0	0	0	1	0	0	0	0	0	1	1	1	0	0	0	0	0	0	1	0	2	0	1	0	0	0	0	0	0
metF, MTHFR; methylenetetrahydrofolate reductase (NADPH) [EC:1.5.1.20]	K00297	3	0	1	0	1	4	1	0	1	0	1	1	1	1	2	1	0	0	1	2	2	1	2	3	2	1	0	0	1	1	3	1	3	1	1	3	1	1	4	1	0	0	2	5	2	1	2	2
ceo; N5-(carboxyethyl)ornithine synthase [EC:1.5.1.24]	K00298	0	0	0	0	0	0	0	0	0	0	0	0	0	0	0	0	0	0	0	0	0	0	0	0	0	0	0	0	0	0	0	0	0	0	0	0	0	0	0	0	0	0	0	0	0	0	0	0
ssuE; FMN reductase [EC:1.5.1.38]	K00299	0	1	0	0	0	0	1	0	0	0	0	0	0	0	0	0	0	0	0	0	0	0	0	0	0	0	0	0	0	0	0	0	0	0	0	0	0	0	1	0	0	0	0	0	0	0	0	0
E1.5.3.1; sarcosine oxidase [EC:1.5.3.1]	K00301	0	0	0	0	2	0	0	0	1	1	0	0	0	1	0	0	0	0	0	0	0	0	0	0	0	0	0	0	0	0	0	0	0	0	0	0	0	0	0	0	0	0	0	0	0	0	0	0
soxA; sarcosine oxidase, subunit alpha [EC:1.5.3.1]	K00302	0	0	1	0	0	0	0	0	0	0	0	1	0	0	0	0	0	0	0	0	0	0	0	0	0	0	0	0	0	0	0	0	1	0	1	0	1	0	0	0	0	0	0	0	0	0	2	0
soxB; sarcosine oxidase, subunit beta [EC:1.5.3.1]	K00303	0	0	0	0	0	1	0	3	0	1	0	2	0	0	0	0	0	0	8	0	0	0	0	0	0	1	0	1	0	0	3	0	1	0	1	0	0	0	0	0	0	0	0	1	2	0	2	0
soxD; sarcosine oxidase, subunit delta [EC:1.5.3.1]	K00304	0	0	0	0	0	0	0	0	0	0	0	0	0	0	0	0	0	0	0	0	0	0	0	0	0	0	0	0	0	0	0	0	1	0	0	0	0	0	0	0	0	0	0	0	0	0	0	0
soxG; sarcosine oxidase, subunit gamma [EC:1.5.3.1]	K00305	0	0	0	0	0	0	0	0	0	0	0	0	0	0	0	0	0	0	0	0	0	0	0	0	0	0	0	0	0	0	0	0	0	0	0	0	0	0	0	0	0	0	0	0	0	0	0	0
PIPOX; sarcosine oxidase / L-pipecolate oxidase [EC:1.5.3.1 1.5.3.7]	K00306	0	0	0	0	0	0	0	1	0	0	0	0	0	0	0	0	0	0	0	0	0	0	0	0	0	0	0	0	0	0	0	0	0	0	0	0	0	0	0	0	0	0	0	0	0	0	0	0
ETFDH; electron-transferring-flavoprotein dehydrogenase [EC:1.5.5.1]	K00311	0	0	0	0	0	1	0	2	0	2	0	0	0	1	0	0	0	0	0	0	1	0	0	0	0	0	0	0	0	0	1	0	0	0	0	0	0	0	0	0	0	0	0	0	0	0	0	0
fixC; electron transfer flavoprotein-quinone oxidoreductase [EC:1.5.5.-]	K00313	0	0	0	0	0	0	0	0	0	0	0	0	0	0	0	0	0	1	0	0	0	0	0	0	0	0	0	0	0	0	0	0	0	1	0	0	0	0	0	0	1	0	0	1	0	0	1	0
SARDH; sarcosine dehydrogenase [EC:1.5.8.3]	K00314	0	0	0	0	0	0	0	0	0	0	0	0	0	0	0	0	0	0	0	0	0	0	0	0	0	0	0	0	0	0	0	0	0	0	0	0	0	0	0	0	0	0	0	0	0	0	0	0
DMGDH; dimethylglycine dehydrogenase [EC:1.5.8.4]	K00315	0	0	0	0	0	0	0	0	0	0	0	0	0	0	0	0	0	0	0	0	0	0	0	0	0	0	0	0	0	0	0	0	0	0	0	0	0	0	0	0	0	0	0	0	0	0	0	0
spdH; spermidine dehydrogenase [EC:1.5.99.6]	K00316	0	0	0	0	0	0	0	0	0	0	0	0	0	0	0	0	0	0	0	0	0	0	0	0	0	0	0	0	0	0	0	0	0	0	0	0	0	0	0	0	0	0	0	0	0	0	0	0
dmd-tmd; dimethylamine/trimethylamine dehydrogenase [EC:1.5.8.1 1.5.8.2]	K00317	0	0	0	0	0	0	0	0	0	0	0	0	0	0	0	0	0	0	1	0	0	0	0	0	0	0	0	0	0	0	0	0	0	0	0	0	0	0	0	0	0	0	0	0	0	0	0	0
PRODH; proline dehydrogenase [EC:1.5.-.-]	K00318	3	0	0	0	0	1	1	2	0	0	0	0	0	0	0	0	0	1	0	0	0	0	0	0	0	0	0	1	1	1	0	1	0	0	0	0	0	1	0	1	0	1	0	0	0	0	0	0
mtd; methylenetetrahydromethanopterin dehydrogenase [EC:1.5.98.1]	K00319	0	0	0	0	0	0	0	0	0	0	0	0	0	0	0	0	0	0	0	0	0	0	0	0	0	0	0	0	0	0	0	0	0	0	0	0	0	0	0	0	0	0	0	0	0	0	0	0
mer; 5,10-methylenetetrahydromethanopterin reductase [EC:1.5.98.2]	K00320	0	0	0	0	0	0	0	0	0	0	0	0	0	0	0	0	0	0	0	0	0	0	0	0	0	0	0	0	0	0	0	0	0	0	0	0	0	0	0	0	0	0	0	0	0	0	0	0
sthA, udhA; NAD(P) transhydrogenase [EC:1.6.1.1]	K00322	0	0	0	0	0	1	0	0	2	0	0	0	0	0	0	0	0	0	0	0	0	0	0	0	0	0	0	0	0	0	0	0	0	0	0	0	0	0	0	0	0	0	0	0	0	0	0	0
pntA; H+-translocating NAD(P) transhydrogenase subunit alpha [EC:1.6.1.2 7.1.1.1]	K00324	0	0	0	0	1	2	1	2	2	1	0	0	2	0	1	3	0	0	0	0	0	2	0	2	2	0	3	0	1	2	2	0	0	0	1	0	0	0	0	2	0	2	0	0	0	0	3	0
pntB; H+-translocating NAD(P) transhydrogenase subunit beta [EC:1.6.1.2 7.1.1.1]	K00325	0	0	0	0	1	1	1	1	1	0	0	0	1	0	1	1	0	0	0	0	0	2	0	1	1	0	2	0	1	1	1	0	0	0	0	0	0	0	2	1	0	1	0	0	0	0	1	0
POR; NADPH-ferrihemoprotein reductase [EC:1.6.2.4]	K00327	0	0	0	0	0	0	0	0	0	0	0	0	0	0	0	0	0	0	0	0	0	0	0	0	0	0	0	0	0	0	0	0	0	0	0	0	0	0	0	0	0	0	0	0	0	0	0	0
E7.1.1.2; NADH dehydrogenase [EC:7.1.1.2]	K00329	0	0	0	0	0	0	0	0	0	0	0	0	0	0	0	0	0	0	0	0	0	0	0	0	0	0	0	0	0	0	0	0	0	0	0	0	0	0	0	0	0	0	0	0	0	0	0	0
nuoA; NADH-quinone oxidoreductase subunit A [EC:7.1.1.2]	K00330	3	2	1	1	1	3	2	2	1	2	0	0	0	0	0	1	1	0	0	0	0	1	1	2	0	0	0	1	1	1	0	0	0	1	0	0	0	1	1	0	1	0	1	0	2	0	0	0
nuoB; NADH-quinone oxidoreductase subunit B [EC:7.1.1.2]	K00331	4	2	1	1	1	2	2	0	1	2	0	0	0	0	0	2	0	0	0	0	0	0	1	2	0	0	0	1	0	1	0	0	0	2	1	0	0	1	2	0	1	0	1	0	1	0	0	1
nuoC; NADH-quinone oxidoreductase subunit C [EC:7.1.1.2]	K00332	3	1	1	1	1	2	2	0	1	2	0	0	0	0	0	1	1	0	0	0	0	1	1	1	0	0	0	1	0	1	0	0	0	1	0	0	0	1	2	0	1	0	1	0	2	0	0	1
nuoD; NADH-quinone oxidoreductase subunit D [EC:7.1.1.2]	K00333	3	1	1	1	1	2	2	1	1	2	0	0	0	0	0	1	1	0	0	0	0	2	1	1	0	0	0	1	0	1	0	0	0	2	1	0	1	1	2	0	1	0	1	0	2	0	0	1
nuoE; NADH-quinone oxidoreductase subunit E [EC:7.1.1.2]	K00334	0	0	1	1	1	1	2	0	0	1	0	0	0	3	6	0	1	3	1	2	1	3	1	3	1	1	3	2	0	1	4	2	4	8	2	1	3	2	1	1	3	5	1	3	1	0	4	1
nuoF; NADH-quinone oxidoreductase subunit F [EC:7.1.1.2]	K00335	1	0	2	1	1	1	2	2	0	3	1	0	0	4	8	0	1	6	4	3	1	7	3	4	2	0	9	4	0	1	8	2	8	8	2	2	3	4	2	1	2	8	1	7	1	0	7	3
nuoG; NADH-quinone oxidoreductase subunit G [EC:7.1.1.2]	K00336	1	1	1	1	1	2	1	2	0	1	0	0	0	1	2	0	0	0	1	0	0	1	0	1	1	0	0	1	0	0	2	0	2	1	0	0	3	0	2	1	1	1	0	1	1	0	1	0
nuoH; NADH-quinone oxidoreductase subunit H [EC:7.1.1.2]	K00337	3	1	1	1	1	2	2	1	2	3	0	0	0	0	0	1	0	0	0	0	0	3	0	2	1	0	0	1	0	1	0	0	0	1	0	0	1	2	1	0	1	0	1	0	1	0	0	1
nuoI; NADH-quinone oxidoreductase subunit I [EC:7.1.1.2]	K00338	2	1	1	1	1	2	2	1	1	1	0	0	0	0	0	1	1	0	0	0	0	2	1	1	0	0	0	1	0	1	0	0	0	0	1	0	0	1	2	0	0	0	0	1	0	0	0	0
nuoJ; NADH-quinone oxidoreductase subunit J [EC:7.1.1.2]	K00339	2	0	1	1	1	2	2	1	1	2	0	0	0	0	0	1	1	0	0	0	0	2	0	2	0	0	0	1	0	1	0	0	0	1	0	0	0	1	1	0	1	0	0	0	1	0	0	1
nuoK; NADH-quinone oxidoreductase subunit K [EC:7.1.1.2]	K00340	2	1	1	1	1	2	2	1	1	3	0	0	0	0	0	1	1	0	0	0	0	2	0	2	0	0	0	1	0	1	0	0	0	0	0	0	0	1	1	0	0	0	0	0	2	0	0	1
nuoL; NADH-quinone oxidoreductase subunit L [EC:7.1.1.2]	K00341	2	2	0	1	1	2	4	2	1	4	0	0	0	0	0	0	1	0	0	0	0	3	0	2	0	0	0	1	1	1	0	0	0	1	0	0	0	2	2	0	1	0	1	0	0	0	0	0
nuoM; NADH-quinone oxidoreductase subunit M [EC:7.1.1.2]	K00342	2	3	1	1	2	3	3	1	3	3	0	0	0	0	0	1	0	0	0	0	0	3	0	3	0	0	0	1	1	1	0	0	0	1	0	0	0	1	1	0	1	0	1	0	0	0	0	0
nuoN; NADH-quinone oxidoreductase subunit N [EC:7.1.1.2]	K00343	2	2	1	1	1	2	2	2	1	2	0	0	0	0	0	1	0	0	0	0	0	2	1	1	0	0	0	1	1	1	0	0	0	1	0	0	0	3	1	0	1	0	0	0	2	0	0	0
qor, CRYZ; NADPH2:quinone reductase [EC:1.6.5.5]	K00344	0	0	1	1	1	1	0	1	2	0	0	0	0	1	0	0	1	1	1	0	0	0	2	0	0	0	2	0	1	1	1	0	0	0	0	0	1	0	1	0	0	0	0	3	0	0	0	0
nqrA; Na+-transporting NADH:ubiquinone oxidoreductase subunit A [EC:7.2.1.1]	K00346	0	0	0	0	0	0	0	0	1	1	0	0	0	1	0	0	0	0	1	1	0	0	1	0	1	0	2	0	1	1	0	1	0	0	0	0	0	1	0	1	0	1	0	0	0	0	1	0
nqrB; Na+-transporting NADH:ubiquinone oxidoreductase subunit B [EC:7.2.1.1]	K00347	0	0	0	0	0	0	0	0	2	1	0	0	0	1	0	0	0	0	1	1	0	0	1	1	3	1	2	0	1	1	0	1	0	0	0	0	2	1	0	1	0	1	0	0	0	0	2	0
nqrC; Na+-transporting NADH:ubiquinone oxidoreductase subunit C [EC:7.2.1.1]	K00348	0	0	0	0	0	0	0	0	1	1	0	0	0	1	0	0	0	0	0	1	0	0	0	0	2	1	0	0	1	1	0	1	0	0	0	1	2	1	0	1	0	1	0	0	0	0	1	0
nqrD; Na+-transporting NADH:ubiquinone oxidoreductase subunit D [EC:7.2.1.1]	K00349	0	0	0	0	0	0	0	0	1	0	0	0	0	0	0	0	0	0	0	1	0	0	0	0	1	1	1	0	1	1	0	1	0	0	0	1	2	1	0	1	0	1	0	0	0	0	2	0
nqrE; Na+-transporting NADH:ubiquinone oxidoreductase subunit E [EC:7.2.1.1]	K00350	0	0	0	0	0	0	0	0	1	0	0	0	0	0	0	0	0	0	0	1	0	0	0	0	1	2	1	0	1	1	0	1	0	0	0	1	2	1	0	1	0	1	0	0	0	0	1	0
nqrF; Na+-transporting NADH:ubiquinone oxidoreductase subunit F [EC:7.2.1.1]	K00351	0	0	0	0	0	0	0	0	1	0	0	0	0	1	0	0	0	0	0	1	0	0	0	0	1	1	1	0	1	1	0	1	0	0	0	2	2	0	0	1	0	1	0	0	0	0	2	0
E1.6.99.1; NADPH2 dehydrogenase [EC:1.6.99.1]	K00354	0	0	0	0	0	0	0	0	0	0	0	0	0	0	0	0	0	0	0	0	0	0	0	0	0	0	0	0	0	0	0	0	0	0	0	0	0	0	0	0	0	0	0	0	0	0	0	0
NQO1; NAD(P)H dehydrogenase (quinone) [EC:1.6.5.2]	K00355	0	0	0	0	0	0	0	0	0	0	0	0	0	0	0	0	0	0	1	0	0	0	0	0	0	0	0	0	0	0	1	0	1	0	0	0	0	0	0	0	0	0	0	1	0	0	0	0
E1.6.99.3; NADH dehydrogenase [EC:1.6.99.3]	K00356	0	0	0	0	0	0	1	0	0	4	0	0	0	0	0	0	0	0	0	0	0	0	1	1	0	0	1	0	0	0	0	0	0	1	1	0	0	0	0	0	0	0	0	0	0	0	0	0
E1.7.1.7, guaC; GMP reductase [EC:1.7.1.7]	K00364	1	0	0	0	0	0	0	0	0	0	0	0	0	0	0	0	0	0	0	0	0	0	0	0	0	0	0	0	0	0	0	0	0	0	0	0	0	0	0	0	0	0	0	0	0	0	0	0
uaZ; urate oxidase [EC:1.7.3.3]	K00365	0	0	0	0	0	0	0	0	0	0	0	0	0	0	0	0	0	0	0	0	0	0	0	0	0	0	0	0	0	0	0	0	0	0	0	0	0	0	0	0	0	0	0	0	0	0	0	0
K00375; GntR family transcriptional regulator / MocR family aminotransferase	K00375	0	0	0	0	0	0	0	0	0	0	0	0	0	0	0	0	0	0	0	0	0	0	0	0	0	0	0	0	0	0	0	0	0	0	0	0	0	0	0	0	0	0	0	0	0	0	0	0
cysJ; sulfite reductase (NADPH) flavoprotein alpha-component [EC:1.8.1.2]	K00380	0	2	0	0	2	1	0	0	0	0	0	0	0	0	0	0	0	0	0	0	0	0	0	0	0	0	0	0	0	0	0	0	0	0	0	0	0	0	0	0	0	0	0	0	0	0	1	0
cysI; sulfite reductase (NADPH) hemoprotein beta-component [EC:1.8.1.2]	K00381	0	1	0	0	0	1	0	0	0	0	0	0	0	0	0	0	0	0	0	0	0	1	0	0	0	0	1	0	0	0	0	0	0	0	0	0	0	0	0	0	0	0	0	0	0	0	2	0
DLD, lpd, pdhD; dihydrolipoamide dehydrogenase [EC:1.8.1.4]	K00382	6	1	1	1	3	2	2	2	1	4	2	3	0	1	0	2	0	2	3	1	0	0	1	1	2	0	1	1	2	1	2	0	4	0	2	1	4	1	2	1	0	1	3	3	0	2	3	0
GSR, gor; glutathione reductase (NADPH) [EC:1.8.1.7]	K00383	0	1	0	0	0	0	0	0	0	0	0	0	1	0	0	0	0	0	0	0	0	0	0	0	0	0	0	0	0	0	0	0	0	0	0	0	0	0	0	0	0	0	0	0	0	0	0	0
trxB, TRR; thioredoxin reductase (NADPH) [EC:1.8.1.9]	K00384	6	1	1	2	0	1	1	4	2	3	0	1	0	4	1	3	1	0	2	1	0	1	2	1	0	0	0	1	1	1	3	1	1	1	4	0	2	1	2	2	1	1	2	1	0	1	1	0
yidH; putative membrane protein	K00389	0	0	0	0	0	0	0	0	0	0	0	0	1	0	0	0	0	0	0	0	0	0	0	0	0	0	0	0	0	0	0	0	1	1	0	0	0	0	0	0	0	0	1	0	0	0	0	0
cysH; phosphoadenosine phosphosulfate reductase [EC:1.8.4.8 1.8.4.10]	K00390	2	1	1	0	1	1	1	0	1	0	0	0	0	0	0	1	0	0	0	0	0	1	0	1	1	1	2	0	0	0	0	1	1	0	0	2	0	0	0	1	0	0	0	1	0	1	2	0
ccoN; cytochrome c oxidase cbb3-type subunit I [EC:1.9.3.1]	K00404	0	1	0	0	0	1	0	0	1	2	0	0	0	0	0	0	0	0	0	0	0	0	0	0	0	0	0	0	0	0	0	0	0	0	0	0	0	0	0	0	0	0	0	0	0	0	1	0
ccoO; cytochrome c oxidase cbb3-type subunit II	K00405	0	1	0	0	0	1	0	0	0	0	0	0	0	0	0	0	0	0	0	0	0	0	0	0	0	0	0	0	0	0	0	0	0	0	0	0	0	0	0	0	0	0	0	0	0	0	1	0
ccoP; cytochrome c oxidase cbb3-type subunit III	K00406	1	0	0	0	2	0	0	1	0	4	0	0	0	0	0	0	0	0	0	0	0	0	0	0	0	0	0	0	0	0	0	0	0	0	0	0	0	0	0	0	0	2	0	0	0	0	0	0
ccoQ; cytochrome c oxidase cbb3-type subunit IV	K00407	0	0	0	0	0	0	0	0	0	0	0	0	0	0	0	0	0	0	0	0	0	0	0	0	0	0	0	0	0	0	0	0	0	0	0	0	0	0	0	0	0	0	0	0	0	0	0	0
fbcH; ubiquinol-cytochrome c reductase cytochrome b/c1 subunit	K00410	0	0	0	0	0	0	0	0	0	0	0	0	0	0	0	0	0	0	0	0	0	0	0	0	0	0	0	0	0	0	0	0	0	0	0	0	0	0	0	0	0	0	0	0	0	0	0	0
UQCRFS1, RIP1, petA; ubiquinol-cytochrome c reductase iron-sulfur subunit [EC:7.1.1.8]	K00411	0	0	0	0	0	0	0	1	0	0	0	0	0	0	0	0	0	0	0	0	0	1	1	0	0	0	1	1	1	0	0	0	0	0	0	0	0	0	0	0	0	0	0	0	0	0	1	0
CYTB, petB; ubiquinol-cytochrome c reductase cytochrome b subunit	K00412	0	2	0	0	0	0	1	0	2	0	0	2	0	0	0	1	0	2	0	0	0	2	2	1	0	0	3	0	0	0	0	0	1	0	0	0	0	0	0	0	0	0	0	0	0	0	0	0
CYC1, CYT1, petC; ubiquinol-cytochrome c reductase cytochrome c1 subunit	K00413	0	0	0	0	0	0	0	0	0	0	0	0	0	0	0	0	0	0	0	0	0	0	0	0	0	0	0	0	0	0	0	0	0	0	0	0	0	0	0	0	0	0	0	0	0	0	0	0
QCR7, UQCRB; ubiquinol-cytochrome c reductase subunit 7	K00417	0	0	0	0	0	0	0	0	0	0	0	0	0	0	0	0	0	0	0	0	0	0	0	0	0	0	0	0	0	0	0	0	0	0	0	0	0	0	0	0	0	0	0	0	0	0	0	0
E1.10.3.3; L-ascorbate oxidase [EC:1.10.3.3]	K00423	0	0	0	0	0	0	0	1	0	0	0	0	0	0	0	0	0	0	0	0	0	0	0	0	0	0	0	0	0	0	0	0	0	0	0	0	0	0	0	0	0	0	0	0	0	0	0	0
cydA; cytochrome bd ubiquinol oxidase subunit I [EC:7.1.1.7]	K00425	1	0	0	0	0	0	0	0	0	1	0	1	1	0	0	1	1	0	0	0	0	0	1	1	0	0	4	1	0	1	0	1	0	0	0	0	0	1	1	1	0	0	0	1	0	0	2	0
cydB; cytochrome bd ubiquinol oxidase subunit II [EC:7.1.1.7]	K00426	1	0	0	0	0	0	0	0	0	0	0	1	1	0	0	1	1	0	0	0	0	0	1	0	0	0	3	1	0	1	0	1	0	0	0	0	0	1	1	2	0	0	0	1	0	0	3	0
E1.11.1.5; cytochrome c peroxidase [EC:1.11.1.5]	K00428	3	0	1	2	0	0	1	0	4	0	1	0	0	0	0	1	0	1	0	0	0	0	0	0	0	0	4	0	1	0	0	1	0	0	0	0	0	0	0	0	0	1	0	0	0	0	1	0
gpx; glutathione peroxidase [EC:1.11.1.9]	K00432	3	0	1	1	2	0	0	0	1	1	0	0	1	0	0	0	0	0	0	0	0	0	1	0	0	1	0	0	1	0	0	0	0	0	0	0	0	0	1	2	0	1	0	0	0	0	0	0
cpo; non-heme chloroperoxidase [EC:1.11.1.10]	K00433	0	0	0	0	0	0	0	0	0	0	0	0	0	0	0	0	0	0	0	0	0	0	0	0	0	0	0	0	0	0	0	0	0	0	0	0	0	0	0	0	0	0	0	0	0	0	0	0
E1.11.1.11; L-ascorbate peroxidase [EC:1.11.1.11]	K00434	0	0	0	0	0	0	0	0	0	0	0	0	0	0	0	0	0	0	0	0	0	0	0	0	0	0	0	0	0	0	0	0	0	0	0	0	0	0	0	0	0	0	0	0	0	0	0	0
hemQ; Fe-coproporphyrin III decarboxylase [EC:1.11.1.-]	K00435	0	0	0	0	0	0	0	0	0	0	0	0	0	0	0	0	0	0	0	0	0	0	0	0	0	0	0	0	0	0	0	0	0	0	0	0	0	0	0	0	0	0	0	0	0	0	0	0
hoxH; NAD-reducing hydrogenase large subunit [EC:1.12.1.2]	K00436	0	0	0	0	0	0	0	0	0	0	1	0	1	0	0	0	0	0	0	0	0	0	0	0	0	2	0	0	0	0	0	1	0	0	0	0	0	1	0	0	0	1	0	0	0	0	0	0
hydB; [NiFe] hydrogenase large subunit [EC:1.12.2.1]	K00437	0	0	0	0	0	0	0	0	0	0	0	0	0	0	2	0	0	0	2	0	2	0	0	0	0	0	0	0	0	0	0	0	0	0	0	0	0	0	0	0	0	0	0	0	0	0	0	0
frhB; coenzyme F420 hydrogenase subunit beta [EC:1.12.98.1]	K00441	0	0	0	0	0	0	0	0	0	0	0	2	1	0	1	0	0	0	3	0	0	0	0	0	1	2	0	0	0	0	2	1	3	0	0	0	1	0	0	1	0	1	0	1	0	1	3	0
frhD; coenzyme F420 hydrogenase subunit delta	K00442	0	0	0	0	0	0	0	0	0	0	0	0	0	0	0	0	0	0	0	0	0	0	0	0	0	2	0	1	0	0	0	0	0	0	0	1	0	2	0	0	0	0	0	0	0	0	0	0
dmpB, xylE; catechol 2,3-dioxygenase [EC:1.13.11.2]	K00446	0	0	0	0	0	0	0	0	0	0	0	0	0	0	0	0	0	0	0	0	0	0	0	0	0	0	0	0	0	0	0	0	0	0	0	0	0	0	0	0	0	0	0	0	0	0	0	0
pcaG; protocatechuate 3,4-dioxygenase, alpha subunit [EC:1.13.11.3]	K00448	0	0	0	0	0	0	0	0	0	0	0	0	0	0	0	0	0	0	0	0	0	0	0	0	0	0	0	0	0	0	0	0	0	0	0	0	0	0	0	0	0	0	0	0	0	0	0	0
pcaH; protocatechuate 3,4-dioxygenase, beta subunit [EC:1.13.11.3]	K00449	0	0	1	0	1	0	0	0	0	2	0	0	0	0	0	0	0	0	0	0	0	0	0	0	0	0	0	0	0	0	0	0	0	0	0	0	0	0	0	0	0	0	0	0	0	0	0	0
E1.13.11.4; gentisate 1,2-dioxygenase [EC:1.13.11.4]	K00450	0	0	0	0	0	0	0	0	0	0	0	0	0	0	0	0	0	0	0	0	0	0	0	0	0	0	0	0	0	0	0	0	0	0	0	0	1	0	0	0	0	0	0	0	0	0	0	0
HGD, hmgA; homogentisate 1,2-dioxygenase [EC:1.13.11.5]	K00451	3	0	0	1	0	1	0	0	0	0	0	0	0	0	0	0	0	0	0	0	0	0	0	0	0	0	0	0	1	0	0	0	0	0	0	0	0	0	0	0	0	0	0	0	0	0	0	0
HAAO; 3-hydroxyanthranilate 3,4-dioxygenase [EC:1.13.11.6]	K00452	3	0	0	1	0	0	0	0	0	0	0	0	0	0	0	0	0	0	0	0	0	0	0	0	0	0	0	0	0	0	0	0	0	0	0	0	0	0	0	0	0	0	0	0	0	0	0	0
TDO2, kynA; tryptophan 2,3-dioxygenase [EC:1.13.11.11]	K00453	2	0	0	1	0	0	0	1	0	1	0	0	0	0	0	0	0	0	0	0	0	0	0	0	0	0	0	0	0	0	0	0	0	0	0	0	0	0	2	0	0	0	0	0	0	0	0	0
LOX2S; lipoxygenase [EC:1.13.11.12]	K00454	0	0	0	0	0	0	0	0	0	0	0	0	0	0	0	0	0	0	0	0	0	0	0	0	0	0	0	0	0	0	1	0	1	0	0	0	0	0	0	0	0	0	0	0	0	0	0	0
hpaD, hpcB; 3,4-dihydroxyphenylacetate 2,3-dioxygenase [EC:1.13.11.15]	K00455	0	0	0	0	0	0	0	0	0	0	0	0	0	0	0	0	0	0	0	0	0	0	0	0	0	0	0	0	0	0	0	0	0	0	0	0	0	0	0	0	0	0	0	0	0	0	0	0
CDO1; cysteine dioxygenase [EC:1.13.11.20]	K00456	0	0	0	1	0	0	0	0	0	0	0	0	0	0	0	0	0	0	0	0	0	0	0	0	0	0	0	0	0	0	0	0	0	0	0	0	0	0	0	0	0	0	0	0	0	0	0	0
HPD, hppD; 4-hydroxyphenylpyruvate dioxygenase [EC:1.13.11.27]	K00457	3	0	1	1	0	1	0	0	0	0	0	0	0	0	0	0	0	0	0	0	0	0	0	0	0	0	0	0	1	0	0	0	0	0	0	0	0	0	0	0	0	0	0	0	0	0	0	0
ncd2, npd; nitronate monooxygenase [EC:1.13.12.16]	K00459	0	0	0	0	0	1	0	1	0	1	0	1	0	1	2	0	0	1	2	1	0	0	0	1	1	0	1	1	1	0	5	0	1	5	1	0	1	0	0	2	3	1	1	5	1	1	0	3
ALOX5; arachidonate 5-lipoxygenase [EC:1.13.11.34]	K00461	0	0	0	0	0	0	0	0	1	0	0	0	0	0	0	0	0	0	0	0	0	0	0	0	0	0	0	0	0	0	0	0	0	0	0	0	0	0	0	0	0	0	0	0	0	0	0	0
bphC; biphenyl-2,3-diol 1,2-dioxygenase [EC:1.13.11.39]	K00462	0	0	0	1	0	0	0	0	0	0	0	0	0	0	0	0	0	0	0	0	0	0	0	0	0	0	0	0	0	0	0	0	0	0	0	0	0	0	0	0	0	0	0	0	0	0	0	0
IDO, INDO; indoleamine 2,3-dioxygenase [EC:1.13.11.52]	K00463	0	0	0	0	0	0	0	0	0	0	0	0	0	0	0	0	0	0	0	0	0	0	0	0	0	0	0	0	0	0	0	0	0	0	0	0	0	0	0	0	0	0	0	0	0	0	0	0
diox1; all-trans-8'-apo-beta-carotenal 15,15'-oxygenase [EC:1.13.11.75]	K00464	0	0	0	0	0	0	0	0	0	0	0	0	1	0	0	0	0	0	0	0	0	0	0	0	0	0	0	0	0	0	0	0	0	0	0	0	0	0	0	0	0	0	0	0	0	0	0	0
iaaM; tryptophan 2-monooxygenase [EC:1.13.12.3]	K00466	0	0	0	0	0	0	0	0	0	0	0	0	0	0	0	0	0	0	0	0	0	0	0	0	0	0	0	0	0	0	0	0	0	0	0	0	0	0	0	0	0	0	0	0	0	0	0	0
MIOX; inositol oxygenase [EC:1.13.99.1]	K00469	0	0	0	0	1	0	0	0	0	0	0	0	0	0	0	0	0	0	0	0	0	0	0	0	0	0	0	0	0	0	0	0	0	0	0	0	0	0	0	0	0	0	0	0	0	0	0	0
E1.14.11.1; gamma-butyrobetaine dioxygenase [EC:1.14.11.1]	K00471	0	0	1	0	1	0	0	0	0	0	0	0	0	0	0	0	0	0	0	0	0	0	0	0	0	0	0	0	0	0	0	0	0	0	0	0	0	0	0	0	0	0	0	0	0	0	0	0
P4HA; prolyl 4-hydroxylase [EC:1.14.11.2]	K00472	0	0	0	0	0	0	0	0	0	0	0	0	0	0	0	0	0	0	0	0	0	0	0	0	0	0	0	0	0	0	0	0	0	0	0	0	0	0	0	0	0	0	0	0	0	0	0	0
TMLHE; trimethyllysine dioxygenase [EC:1.14.11.8]	K00474	0	0	0	0	0	0	0	0	0	0	0	0	0	0	0	0	0	0	0	0	0	0	0	0	0	0	0	0	0	0	0	0	0	0	0	0	0	0	0	0	0	0	0	0	0	0	0	0
ASPH; aspartate beta-hydroxylase [EC:1.14.11.16]	K00476	0	0	0	0	0	0	0	0	0	0	0	0	0	0	0	0	0	0	0	0	0	0	0	0	0	0	0	0	0	0	0	0	0	0	0	0	0	0	0	0	0	0	0	0	0	0	0	0
PHYH; phytanoyl-CoA hydroxylase [EC:1.14.11.18]	K00477	0	1	0	1	3	5	0	0	2	0	0	0	0	0	0	0	0	0	0	0	0	0	0	0	0	0	0	0	0	0	0	0	0	0	0	0	0	0	0	0	0	0	0	0	0	0	0	0
gbcA; glycine betaine catabolism A	K00479	0	0	0	0	0	0	0	1	0	0	0	0	0	0	0	0	0	0	0	0	0	0	0	0	0	0	0	0	0	0	0	0	0	0	0	0	0	0	0	0	0	0	0	0	0	0	0	0
E1.14.13.1; salicylate hydroxylase [EC:1.14.13.1]	K00480	0	0	0	0	0	0	0	0	0	0	0	0	0	0	0	0	0	1	0	0	0	0	0	0	0	0	0	0	0	0	0	0	0	0	0	0	0	0	0	0	0	0	0	0	0	0	0	0
pobA; p-hydroxybenzoate 3-monooxygenase [EC:1.14.13.2]	K00481	0	0	0	0	0	1	0	0	0	0	0	0	0	0	0	0	0	0	0	0	0	0	0	0	0	0	0	0	0	0	0	0	0	0	0	0	0	0	0	0	0	0	0	0	0	0	0	0
hpaB; 4-hydroxyphenylacetate 3-monooxygenase [EC:1.14.14.9]	K00483	0	0	0	0	0	0	0	0	0	1	0	1	0	0	1	0	0	0	0	0	0	0	0	0	0	0	0	0	0	0	4	0	2	0	0	0	0	0	0	0	0	0	0	0	0	0	0	0
hpaC; flavin reductase (NADH) [EC:1.5.1.36]	K00484	0	0	0	0	0	0	0	0	0	0	0	0	0	0	0	0	0	0	0	0	0	0	0	0	0	0	0	0	0	0	0	0	0	0	0	0	0	0	0	0	0	0	0	0	0	0	0	0
FMO; dimethylaniline monooxygenase (N-oxide forming) [EC:1.14.13.8]	K00485	0	0	0	0	0	0	0	0	0	0	0	0	0	0	0	0	0	0	0	0	0	0	0	0	0	0	0	0	0	0	0	0	0	0	0	0	0	0	0	0	0	0	0	0	0	0	0	0
KMO; kynurenine 3-monooxygenase [EC:1.14.13.9]	K00486	2	0	0	1	0	0	0	0	0	0	0	0	0	0	0	0	0	0	0	0	0	0	0	0	0	0	0	0	0	0	0	0	0	0	0	0	0	0	0	0	0	0	0	0	0	0	0	0
nos; nitric-oxide synthase, bacterial [EC:1.14.14.47]	K00491	0	0	0	0	0	0	0	0	0	0	0	0	0	0	0	0	0	0	0	0	0	0	0	0	0	0	0	0	0	0	0	0	0	0	0	0	0	0	0	0	0	0	0	0	0	0	0	0
E1.14.14.1; unspecific monooxygenase [EC:1.14.14.1]	K00493	0	0	0	0	0	0	0	0	0	0	0	0	0	0	0	0	0	0	0	0	0	0	0	0	0	0	0	0	0	0	0	0	0	0	0	0	0	0	0	0	0	0	0	0	0	0	0	0
alkB1_2, alkM; alkane 1-monooxygenase [EC:1.14.15.3]	K00496	1	0	0	0	0	0	0	0	0	1	0	0	0	0	0	0	0	0	0	0	0	0	0	0	0	0	0	0	0	0	0	0	0	0	0	0	0	0	1	0	0	0	0	0	0	0	0	0
CMO; choline monooxygenase [EC:1.14.15.7]	K00499	0	0	0	0	0	0	0	0	0	1	0	0	0	0	0	0	0	0	0	0	0	0	0	0	0	0	0	0	0	0	0	0	0	0	0	0	0	0	0	0	0	0	0	0	0	0	0	0
phhA, PAH; phenylalanine-4-hydroxylase [EC:1.14.16.1]	K00500	6	0	0	1	0	0	0	0	0	0	0	0	0	0	0	0	0	0	0	0	0	0	0	0	0	0	0	0	1	0	0	0	0	0	0	0	0	0	0	0	0	1	0	0	0	0	0	0
PAM, PHM; peptidylglycine monooxygenase [EC:1.14.17.3]	K00504	0	0	0	0	0	0	0	0	0	0	0	0	0	0	0	0	0	0	0	0	0	0	0	0	0	0	0	0	0	0	0	0	0	0	0	0	0	0	0	0	0	0	0	0	0	0	0	0
TYR; tyrosinase [EC:1.14.18.1]	K00505	0	0	0	0	0	0	0	0	0	0	0	0	0	0	0	0	0	0	0	0	0	0	0	0	0	0	0	0	0	0	0	0	0	0	0	0	0	0	0	0	0	0	0	0	0	0	0	0
SCD, desC; stearoyl-CoA desaturase (Delta-9 desaturase) [EC:1.14.19.1]	K00507	0	1	2	1	1	1	3	1	4	1	0	0	3	0	0	0	0	0	0	0	0	1	0	0	0	0	0	0	0	0	0	0	0	0	0	0	0	0	1	0	0	0	0	0	0	0	0	0
E1.14.19.3; linoleoyl-CoA desaturase [EC:1.14.19.3]	K00508	3	0	0	1	0	0	0	0	0	0	0	0	0	0	0	0	0	0	0	0	0	0	0	0	0	0	0	0	0	0	0	0	0	0	0	0	0	0	0	0	0	0	0	0	0	0	0	0
HMOX1; heme oxygenase 1 [EC:1.14.14.18]	K00510	0	0	0	0	0	0	0	0	0	0	0	0	1	0	0	0	0	0	0	0	0	0	0	0	0	0	0	0	0	0	0	0	0	0	0	0	0	0	0	0	0	0	0	0	0	0	0	0
SQLE, ERG1; squalene monooxygenase [EC:1.14.14.17]	K00511	0	0	0	0	0	0	0	0	0	0	0	0	0	0	0	0	0	0	0	0	0	0	0	0	0	0	0	0	0	0	0	0	0	0	0	0	0	0	0	0	0	0	0	0	0	0	0	0
ZDS, crtQ; zeta-carotene desaturase [EC:1.3.5.6]	K00514	0	0	1	0	0	0	0	0	0	0	0	0	1	0	0	0	0	0	0	0	0	0	1	0	0	0	0	0	0	0	0	0	0	0	0	0	0	0	0	0	0	0	0	0	0	0	0	0
CYP81F; indol-3-yl-methylglucosinolate hydroxylase [EC:1.14.-.-]	K00517	0	0	0	2	0	2	0	0	0	0	0	0	1	0	0	0	0	0	0	0	0	0	0	0	0	0	1	0	0	0	0	0	0	0	0	0	0	0	1	0	0	0	0	0	0	0	0	0
sodN; nickel superoxide dismutase [EC:1.15.1.1]	K00518	0	0	0	0	0	0	0	0	0	1	0	2	0	0	0	2	0	1	0	1	0	0	0	0	0	0	0	1	1	0	1	0	0	0	0	0	0	0	1	0	0	0	0	1	0	0	1	0
merA; mercuric reductase [EC:1.16.1.1]	K00520	0	0	0	0	0	0	0	1	0	0	0	0	0	0	0	0	0	0	1	0	0	0	0	0	0	0	0	0	0	0	0	0	0	0	0	0	0	0	0	0	0	0	0	0	0	0	1	0
ascD, ddhD, rfbI; CDP-4-dehydro-6-deoxyglucose reductase, E3 [EC:1.17.1.1]	K00523	0	0	0	0	0	0	1	0	0	1	0	0	0	0	0	0	0	0	0	0	0	0	0	1	0	0	0	0	0	0	0	0	0	0	0	0	0	0	0	0	0	0	0	0	0	0	0	0
nrdJ; ribonucleotide reductase, class II [EC:1.17.4.1]	K00524	0	0	0	0	0	0	0	0	0	0	0	0	1	0	0	0	0	0	0	0	0	0	0	0	0	0	0	0	0	0	0	0	0	0	0	0	0	0	0	0	0	0	0	0	0	0	0	0
E1.17.4.1A, nrdA, nrdE; ribonucleoside-diphosphate reductase alpha chain [EC:1.17.4.1]	K00525	4	1	1	2	2	3	1	2	1	3	0	1	0	2	0	2	0	0	0	0	1	2	2	3	0	0	1	0	1	1	1	1	1	1	2	1	1	1	1	2	1	1	0	2	1	1	3	1
E1.17.4.1B, nrdB, nrdF; ribonucleoside-diphosphate reductase beta chain [EC:1.17.4.1]	K00526	2	0	0	0	0	1	0	0	0	0	0	0	0	0	0	0	0	0	0	0	0	0	0	0	0	0	0	0	0	0	0	0	0	0	0	0	0	0	0	0	0	0	0	0	0	0	0	0
rtpR; ribonucleoside-triphosphate reductase (thioredoxin) [EC:1.17.4.2]	K00527	1	0	0	0	0	0	0	0	0	0	0	1	0	1	0	1	0	1	0	2	2	0	0	1	0	0	0	1	0	0	0	0	0	0	0	0	0	0	0	0	0	0	3	2	0	0	1	0
fpr; ferredoxin/flavodoxin---NADP+ reductase [EC:1.18.1.2 1.19.1.1]	K00528	0	0	1	2	1	0	2	0	0	2	0	1	0	0	0	0	0	0	0	0	1	1	2	0	1	1	1	1	2	1	1	2	1	1	1	1	1	2	1	5	0	3	1	2	1	1	2	1
hcaD; 3-phenylpropionate/trans-cinnamate dioxygenase ferredoxin reductase component [EC:1.18.1.3]	K00529	0	0	0	1	0	0	0	0	0	0	0	0	0	0	0	0	0	0	0	0	0	0	0	0	0	0	0	0	0	0	0	0	0	0	0	0	0	0	0	0	0	0	0	0	0	0	0	0
E1.12.7.2; ferredoxin hydrogenase [EC:1.12.7.2]	K00532	0	0	0	0	0	0	0	0	0	0	0	0	0	0	0	0	0	0	0	0	0	0	0	0	0	0	0	0	0	0	0	0	0	0	0	0	0	0	0	0	0	0	0	0	0	0	0	0
E1.12.7.2L; ferredoxin hydrogenase large subunit [EC:1.12.7.2]	K00533	0	0	0	0	0	0	0	0	0	0	0	1	0	0	0	0	0	0	0	0	1	1	0	0	0	0	0	0	0	0	0	0	0	0	0	0	0	0	0	0	0	0	0	0	0	0	0	0
E1.12.7.2S; ferredoxin hydrogenase small subunit [EC:1.12.7.2]	K00534	0	0	0	0	0	0	0	0	0	0	0	0	0	0	0	0	0	0	0	0	1	0	0	1	0	0	0	0	0	0	0	0	0	0	0	0	0	0	0	0	0	0	0	0	0	0	0	0
arsC1, arsC; arsenate reductase (glutaredoxin) [EC:1.20.4.1]	K00537	5	0	0	0	0	1	2	0	1	2	0	0	1	0	0	0	0	0	0	0	0	0	0	0	0	0	0	0	0	0	0	1	0	0	0	0	0	0	0	0	0	1	0	0	0	0	0	0
ASMT; acetylserotonin O-methyltransferase [EC:2.1.1.4]	K00543	0	0	0	0	1	0	0	0	0	0	0	0	0	0	0	0	0	0	0	0	0	0	0	0	0	0	0	0	0	0	0	0	0	0	0	0	0	0	0	0	0	0	0	0	0	0	0	0
BHMT; betaine-homocysteine S-methyltransferase [EC:2.1.1.5]	K00544	0	0	0	0	0	0	0	0	0	0	0	0	0	0	0	0	0	0	0	0	0	0	0	0	0	0	0	0	0	0	0	0	0	0	0	0	0	0	0	0	0	0	0	0	0	0	0	0
COMT; catechol O-methyltransferase [EC:2.1.1.6]	K00545	0	0	0	0	0	0	0	0	0	0	0	0	0	0	0	0	0	0	0	0	0	0	0	0	0	0	0	0	0	0	0	0	0	0	0	0	0	0	0	0	0	0	0	0	0	0	0	0
mmuM, BHMT2; homocysteine S-methyltransferase [EC:2.1.1.10]	K00547	0	0	0	1	0	1	0	2	0	0	0	0	0	0	0	1	0	0	0	0	0	1	0	0	0	0	0	0	1	0	0	0	0	0	0	0	0	0	0	1	0	0	0	0	0	0	1	0
metH, MTR; 5-methyltetrahydrofolate--homocysteine methyltransferase [EC:2.1.1.13]	K00548	5	3	1	2	2	5	1	2	2	2	1	2	0	6	2	2	1	0	8	3	2	4	4	5	4	3	3	3	2	3	11	1	6	8	2	3	4	2	5	3	4	7	1	5	3	1	5	2
metE; 5-methyltetrahydropteroyltriglutamate--homocysteine methyltransferase [EC:2.1.1.14]	K00549	0	2	2	0	0	1	0	0	0	0	0	1	0	0	0	0	0	0	0	0	0	0	0	0	0	0	0	0	0	0	0	0	0	0	0	0	0	0	0	0	0	0	0	0	0	0	0	0
trmD; tRNA (guanine37-N1)-methyltransferase [EC:2.1.1.228]	K00554	1	1	1	1	1	1	1	0	2	1	0	0	1	1	0	2	1	1	0	0	1	1	0	1	1	0	3	1	0	1	2	1	2	1	0	0	2	0	1	1	0	1	1	1	1	1	1	0
TRMT1, trm1; tRNA (guanine26-N2/guanine27-N2)-dimethyltransferase [EC:2.1.1.215 2.1.1.216]	K00555	0	0	0	0	0	0	0	0	0	0	0	0	1	0	0	0	0	0	0	0	0	0	0	0	0	0	0	0	0	0	0	0	0	0	0	0	0	0	0	0	0	0	0	0	0	0	0	0
trmH; tRNA (guanosine-2'-O-)-methyltransferase [EC:2.1.1.34]	K00556	3	0	0	1	1	0	0	1	1	0	0	0	1	0	0	0	0	0	0	0	0	0	0	0	0	0	0	1	1	0	0	1	0	0	0	0	1	1	0	0	0	1	0	0	0	0	0	0
trmA; tRNA (uracil-5-)-methyltransferase [EC:2.1.1.35]	K00557	0	0	0	0	0	0	0	0	0	0	0	0	0	0	0	0	0	0	0	0	0	0	0	0	0	0	0	0	0	0	0	0	0	0	0	0	0	0	0	0	0	0	0	0	0	0	0	0
DNMT1, dcm; DNA (cytosine-5)-methyltransferase 1 [EC:2.1.1.37]	K00558	11	0	0	0	3	1	1	0	5	6	1	0	0	0	0	0	0	0	0	0	0	4	0	4	0	1	2	1	0	0	0	0	0	1	0	5	1	0	0	3	0	2	0	1	1	2	0	0
E2.1.1.41, SMT1, ERG6; sterol 24-C-methyltransferase [EC:2.1.1.41]	K00559	0	0	0	0	0	0	0	0	0	1	0	0	0	0	0	0	0	0	0	0	0	0	0	0	0	0	0	0	0	0	0	0	0	0	0	0	0	0	0	0	0	0	0	0	0	0	0	0
thyA, TYMS; thymidylate synthase [EC:2.1.1.45]	K00560	4	0	0	0	1	0	0	0	0	1	0	0	0	1	0	0	0	0	0	0	1	0	0	0	0	1	2	1	0	1	1	1	1	1	0	0	0	1	0	2	1	0	0	1	1	0	1	0
ermC, ermA; 23S rRNA (adenine-N6)-dimethyltransferase [EC:2.1.1.184]	K00561	0	0	0	0	0	0	0	0	0	0	0	0	0	0	0	0	0	0	0	0	0	0	0	0	0	0	0	0	0	0	0	0	0	0	0	0	0	0	0	0	0	0	0	0	0	0	0	0
rlmA1; 23S rRNA (guanine745-N1)-methyltransferase [EC:2.1.1.187]	K00563	0	0	0	0	0	0	0	0	0	0	0	0	0	0	0	0	0	0	0	0	0	0	0	0	0	0	0	0	0	0	0	0	0	0	0	0	0	0	0	0	0	0	0	0	0	0	0	0
rsmC; 16S rRNA (guanine1207-N2)-methyltransferase [EC:2.1.1.172]	K00564	0	0	1	1	1	0	0	1	2	1	0	0	0	0	0	0	0	0	0	0	0	0	0	0	0	0	0	0	0	0	0	0	0	0	0	0	0	0	0	0	0	0	0	0	0	0	0	0
mnmA, trmU; tRNA-uridine 2-sulfurtransferase [EC:2.8.1.13]	K00566	5	1	1	1	1	1	1	1	1	1	0	1	1	1	1	1	0	0	1	1	1	1	1	1	0	3	0	1	1	0	2	1	1	1	1	1	3	0	1	1	1	1	3	1	1	1	2	0
ogt, MGMT; methylated-DNA-[protein]-cysteine S-methyltransferase [EC:2.1.1.63]	K00567	4	0	0	0	0	1	1	0	1	0	0	0	0	0	1	0	0	1	1	0	0	1	1	0	1	1	1	0	1	1	1	0	1	0	1	1	1	0	1	1	1	0	0	1	1	0	1	1
ubiG; 2-polyprenyl-6-hydroxyphenyl methylase / 3-demethylubiquinone-9 3-methyltransferase [EC:2.1.1.222 2.1.1.64]	K00568	0	0	1	0	1	0	0	0	0	0	0	0	0	1	0	0	0	0	0	0	0	0	0	0	0	0	0	0	0	0	0	0	0	0	0	0	0	0	0	0	0	1	0	0	0	0	1	0
TPMT, tpmT; thiopurine S-methyltransferase [EC:2.1.1.67]	K00569	0	0	0	0	0	1	0	0	0	1	0	0	1	0	0	0	0	0	0	0	0	0	0	0	0	0	0	0	0	0	0	0	0	0	0	0	0	0	0	0	0	0	0	0	0	0	0	0
pmtA; phosphatidylethanolamine/phosphatidyl-N-methylethanolamine N-methyltransferase [EC:2.1.1.17 2.1.1.71]	K00570	0	0	0	0	0	0	0	0	0	0	0	0	0	0	0	0	0	0	0	0	0	0	0	0	0	0	0	0	0	0	0	0	0	0	0	0	0	0	0	0	0	0	0	0	0	0	0	0
E2.1.1.72; site-specific DNA-methyltransferase (adenine-specific) [EC:2.1.1.72]	K00571	1	1	0	1	0	1	0	0	3	2	0	0	0	1	0	0	0	3	0	2	2	2	1	5	0	0	4	1	1	0	1	0	0	0	0	1	0	2	0	1	1	1	1	2	0	4	2	1
E2.1.1.77, pcm; protein-L-isoaspartate(D-aspartate) O-methyltransferase [EC:2.1.1.77]	K00573	3	0	0	0	1	0	2	0	1	2	0	0	0	2	0	2	1	0	1	2	2	3	0	2	1	1	3	2	1	1	2	1	1	1	1	2	1	2	0	2	1	2	2	1	0	1	1	2
cfa; cyclopropane-fatty-acyl-phospholipid synthase [EC:2.1.1.79]	K00574	0	1	0	0	1	2	0	0	4	0	0	2	0	1	0	1	0	0	0	0	1	0	0	0	0	0	0	1	1	0	0	0	1	0	0	0	0	0	1	0	0	0	3	0	0	0	0	0
cheR; chemotaxis protein methyltransferase CheR [EC:2.1.1.80]	K00575	1	0	0	0	1	1	1	0	0	2	2	2	0	3	0	3	0	3	0	1	0	1	0	1	0	3	2	0	0	0	1	0	1	2	1	1	2	1	0	2	0	1	1	0	1	2	2	0
mtrA; tetrahydromethanopterin S-methyltransferase subunit A [EC:2.1.1.86]	K00577	0	0	0	0	0	0	0	0	0	0	0	0	0	2	0	0	0	0	0	0	0	0	0	1	0	1	0	0	0	0	0	0	0	0	0	0	0	0	0	0	1	0	0	0	0	0	0	0
mtrH; tetrahydromethanopterin S-methyltransferase subunit H [EC:2.1.1.86]	K00584	0	0	0	0	0	0	0	0	0	0	0	0	0	0	1	0	0	0	0	0	0	0	0	0	0	0	0	0	0	0	1	0	0	0	0	0	0	0	0	0	0	0	0	0	1	0	0	0
DPH5; diphthine methyl ester synthase [EC:2.1.1.314]	K00586	0	0	0	0	0	0	0	0	0	0	0	0	0	0	0	0	0	0	0	0	0	0	0	0	0	0	0	0	0	0	0	0	0	0	0	0	0	0	0	0	0	0	0	0	0	0	0	0
ICMT, STE14; protein-S-isoprenylcysteine O-methyltransferase [EC:2.1.1.100]	K00587	0	0	0	0	0	0	1	1	0	0	0	0	0	0	0	0	0	0	0	0	0	0	0	1	0	0	0	0	0	0	0	0	0	0	1	0	0	0	0	0	0	0	0	0	0	0	0	0
E2.1.1.104; caffeoyl-CoA O-methyltransferase [EC:2.1.1.104]	K00588	0	0	0	0	0	0	1	1	0	0	0	0	0	0	0	0	0	0	0	0	0	0	0	0	0	0	0	0	0	0	0	1	0	0	0	0	1	0	0	1	0	0	0	0	0	0	0	0
E2.1.1.113; site-specific DNA-methyltransferase (cytosine-N4-specific) [EC:2.1.1.113]	K00590	0	0	1	0	0	0	0	0	0	0	0	0	0	0	0	0	0	1	0	0	0	0	0	0	0	0	0	0	0	0	0	0	0	0	0	0	0	1	0	0	0	1	0	0	0	0	0	0
xyoA, aldO; alditol oxidase [EC:1.1.3.41]	K00594	0	0	0	0	0	0	0	0	0	0	0	0	0	0	0	0	0	0	0	0	0	0	0	0	0	0	0	0	0	0	0	0	0	0	0	0	0	0	0	0	0	0	0	0	0	0	0	0
cobL; precorrin-6Y C5,15-methyltransferase (decarboxylating) [EC:2.1.1.132]	K00595	0	0	1	0	1	0	0	0	0	1	0	0	2	0	0	0	0	0	0	0	0	1	0	1	0	0	1	0	0	0	0	0	1	0	0	0	0	0	0	0	0	0	0	0	0	0	0	0
E4.1.1.64; 2,2-dialkylglycine decarboxylase (pyruvate) [EC:4.1.1.64]	K00596	0	0	0	0	0	0	0	0	0	0	0	0	0	0	0	0	0	0	0	0	0	0	0	0	0	0	0	0	0	0	0	0	0	0	0	0	0	0	0	0	0	0	0	0	0	0	0	0
MTRR; methionine synthase reductase [EC:1.16.1.8]	K00597	0	0	0	0	0	0	0	0	0	0	0	0	0	0	0	0	0	0	0	0	0	0	0	0	0	0	0	0	0	0	0	0	0	0	0	0	0	0	0	0	0	0	0	0	0	0	0	0
tam; trans-aconitate 2-methyltransferase [EC:2.1.1.144]	K00598	0	0	0	0	0	0	0	0	0	0	0	0	0	0	0	0	0	0	0	0	0	0	0	1	0	0	0	0	0	0	0	0	0	0	0	0	0	0	0	0	0	1	0	0	0	0	0	0
glyA, SHMT; glycine hydroxymethyltransferase [EC:2.1.2.1]	K00600	3	0	1	2	1	1	1	1	1	1	1	0	1	1	1	1	0	0	0	1	1	1	2	1	1	1	2	1	1	1	1	1	0	1	1	3	1	1	1	1	1	1	0	0	0	1	3	1
E2.1.2.2; phosphoribosylglycinamide formyltransferase [EC:2.1.2.2]	K00601	0	0	0	0	0	0	0	1	1	0	0	0	0	0	0	0	0	0	0	0	0	0	0	0	0	0	0	0	0	0	0	0	0	0	0	0	0	0	0	0	0	0	0	0	0	0	0	0
purH; phosphoribosylaminoimidazolecarboxamide formyltransferase / IMP cyclohydrolase [EC:2.1.2.3 3.5.4.10]	K00602	2	0	0	1	1	1	1	1	2	2	0	0	1	2	1	2	0	0	0	0	2	1	1	2	0	1	0	1	1	1	2	1	1	1	0	0	1	1	1	1	1	1	1	2	0	1	0	0
fctD; glutamate formiminotransferase / 5-formyltetrahydrofolate cyclo-ligase [EC:2.1.2.5 6.3.3.2]	K00603	0	0	0	0	0	0	0	0	0	0	0	1	0	0	0	0	0	0	1	0	0	0	0	0	0	0	0	0	0	0	0	0	0	0	1	0	0	0	0	0	0	0	0	0	0	0	0	0
MTFMT, fmt; methionyl-tRNA formyltransferase [EC:2.1.2.9]	K00604	3	2	1	1	1	1	1	2	2	1	2	1	1	1	1	1	1	1	1	2	1	1	1	0	1	0	3	1	1	1	1	1	1	1	0	1	1	1	1	1	0	1	0	4	1	1	1	1
gcvT, AMT; aminomethyltransferase [EC:2.1.2.10]	K00605	4	1	1	1	1	2	1	3	1	0	1	0	1	0	0	0	0	1	2	0	0	0	1	0	0	1	2	2	1	0	1	1	1	0	0	0	1	1	2	2	0	0	0	2	0	1	0	0
panB; 3-methyl-2-oxobutanoate hydroxymethyltransferase [EC:2.1.2.11]	K00606	3	1	1	1	1	1	1	0	1	2	0	0	1	0	0	1	0	0	0	1	1	1	1	1	0	1	0	1	1	0	1	1	3	1	0	2	2	1	1	1	0	1	1	1	1	1	1	1
pyrBI; aspartate carbamoyltransferase [EC:2.1.3.2]	K00608	0	0	0	0	0	0	0	0	0	0	0	0	0	0	0	0	0	0	0	0	0	0	0	0	0	0	0	0	0	0	0	0	0	0	0	0	1	0	0	0	0	0	0	0	0	0	0	0
pyrB, PYR2; aspartate carbamoyltransferase catalytic subunit [EC:2.1.3.2]	K00609	2	1	1	0	1	1	1	1	2	1	0	0	1	0	1	1	0	1	1	3	1	1	2	0	0	1	1	1	1	1	1	1	1	1	0	0	0	0	1	1	1	1	1	1	0	1	1	0
pyrI; aspartate carbamoyltransferase regulatory subunit	K00610	0	0	0	0	0	0	0	0	0	0	0	0	0	0	0	0	0	0	0	0	0	0	0	0	0	0	0	0	1	0	0	1	0	0	0	0	0	0	0	1	0	1	0	0	0	0	0	0
OTC, argF, argI; ornithine carbamoyltransferase [EC:2.1.3.3]	K00611	0	1	1	0	1	1	1	1	1	0	0	0	1	1	1	1	0	0	1	1	1	0	1	1	0	1	1	1	1	2	1	1	1	1	0	1	2	0	1	2	1	1	2	0	0	1	1	1
E2.1.3.-; carbamoyltransferase [EC:2.1.3.-]	K00612	0	0	2	0	3	1	4	0	2	4	0	2	0	1	0	0	1	1	0	2	0	0	2	4	0	0	1	0	1	1	2	0	2	0	1	1	0	0	0	0	0	0	0	3	1	1	1	0
GATM; glycine amidinotransferase [EC:2.1.4.1]	K00613	0	0	0	0	0	0	0	0	0	0	0	0	0	0	1	0	0	0	0	0	0	0	0	0	0	0	0	0	0	0	3	0	0	0	0	0	0	0	0	0	0	0	0	0	0	0	0	0
CSKMT, METTL12; citrate synthase lysine N-methyltransferase [EC:2.1.1.-]	K00614	0	0	0	0	0	0	0	0	0	0	0	0	0	0	0	0	0	0	0	0	0	0	0	0	0	0	0	0	0	0	0	0	0	0	0	0	0	0	0	0	0	0	0	0	0	0	0	0
E2.2.1.1, tktA, tktB; transketolase [EC:2.2.1.1]	K00615	9	3	1	1	1	1	2	2	0	1	0	3	1	1	0	4	1	2	1	3	2	2	3	6	1	3	9	1	1	1	3	4	1	3	0	2	22	1	3	2	3	4	1	2	2	3	1	4
E2.2.1.2, talA, talB; transaldolase [EC:2.2.1.2]	K00616	4	3	1	1	1	2	1	1	2	1	0	2	1	1	0	1	1	0	0	1	1	1	0	1	0	0	1	2	1	0	2	0	1	5	1	1	1	0	1	1	2	0	0	1	0	0	1	1
argA; amino-acid N-acetyltransferase [EC:2.3.1.1]	K00619	0	0	0	0	1	0	1	0	1	0	0	0	0	1	1	1	0	0	1	1	0	0	0	0	1	0	0	0	0	0	1	0	1	1	0	1	0	0	1	1	0	0	1	3	1	1	1	1
argJ; glutamate N-acetyltransferase / amino-acid N-acetyltransferase [EC:2.3.1.35 2.3.1.1]	K00620	0	1	1	0	1	1	1	0	1	0	1	0	1	1	0	1	1	0	1	0	0	1	1	1	0	1	1	0	0	0	1	0	1	1	0	0	1	0	1	0	1	1	1	0	1	1	1	0
GNPNAT1, GNA1; glucosamine-phosphate N-acetyltransferase [EC:2.3.1.4]	K00621	0	0	0	0	0	0	0	0	0	0	0	0	0	0	0	0	0	0	0	0	0	0	0	0	0	0	0	0	0	0	1	0	0	0	0	0	0	0	0	0	0	0	0	1	0	0	0	0
E2.3.1.7; carnitine O-acetyltransferase [EC:2.3.1.7]	K00624	0	0	0	0	0	0	0	0	0	0	0	0	0	0	0	0	0	0	0	0	0	0	0	0	0	0	0	0	0	0	0	0	0	0	1	0	0	0	0	0	0	0	0	0	0	0	0	0
E2.3.1.8, pta; phosphate acetyltransferase [EC:2.3.1.8]	K00625	0	0	0	0	0	0	0	1	0	0	0	0	0	0	0	0	0	0	0	0	0	0	0	0	0	1	0	0	1	1	0	0	0	0	0	0	1	1	0	0	0	0	0	0	0	1	2	0
E2.3.1.9, atoB; acetyl-CoA C-acetyltransferase [EC:2.3.1.9]	K00626	2	0	1	3	1	2	0	2	1	3	0	5	0	3	11	1	1	3	5	2	2	0	1	0	0	0	1	4	2	2	9	1	13	21	1	0	3	2	1	0	17	5	8	3	10	0	0	2
DLAT, aceF, pdhC; pyruvate dehydrogenase E2 component (dihydrolipoamide acetyltransferase) [EC:2.3.1.12]	K00627	4	0	2	1	2	2	2	0	2	4	2	2	1	0	0	1	2	0	2	1	0	0	1	2	2	1	1	0	2	0	1	0	3	0	1	3	5	0	2	2	0	0	2	1	1	0	2	0
ATS1; glycerol-3-phosphate O-acyltransferase [EC:2.3.1.15]	K00630	0	0	0	0	0	0	0	0	0	0	0	0	0	0	0	0	0	0	0	0	0	0	0	0	0	0	0	0	0	0	0	0	0	0	0	0	0	0	0	0	0	0	0	0	0	0	0	0
plsB; glycerol-3-phosphate O-acyltransferase [EC:2.3.1.15]	K00631	0	0	0	2	0	0	0	0	0	4	0	0	0	2	2	0	0	1	2	0	1	0	0	0	0	0	0	0	2	0	1	0	1	0	0	0	0	0	0	0	0	0	1	2	0	0	0	0
fadA, fadI; acetyl-CoA acyltransferase [EC:2.3.1.16]	K00632	3	0	0	3	1	0	0	1	2	1	0	2	0	1	1	0	0	1	1	2	0	0	0	0	0	0	0	0	1	1	0	1	3	1	1	0	0	0	2	0	0	3	1	1	0	0	0	1
lacA; galactoside O-acetyltransferase [EC:2.3.1.18]	K00633	0	0	0	0	0	0	0	1	0	0	0	0	0	0	0	1	0	0	0	0	0	0	0	0	0	0	0	0	0	0	0	0	0	1	0	0	0	0	0	0	0	0	0	0	0	0	1	0
ptb; phosphate butyryltransferase [EC:2.3.1.19]	K00634	0	0	0	0	0	1	0	0	0	0	0	0	0	0	0	0	0	0	0	1	0	1	0	1	0	1	0	0	1	1	0	1	0	0	0	0	1	1	0	0	0	1	0	0	0	0	0	0
tgs, wax-dgat; diacylglycerol O-acyltransferase / wax synthase [EC:2.3.1.20 2.3.1.75]	K00635	0	0	0	0	0	0	0	0	0	0	0	0	0	0	0	0	0	0	0	0	0	0	0	0	0	0	0	0	0	0	0	0	0	0	0	0	0	0	0	0	0	0	0	0	0	0	0	0
SOAT; sterol O-acyltransferase [EC:2.3.1.26]	K00637	0	0	0	0	0	0	0	0	0	0	0	0	0	0	0	0	0	0	0	0	0	0	0	0	0	0	0	0	0	0	0	0	0	0	0	0	0	0	0	0	0	0	0	0	0	0	0	0
kbl, GCAT; glycine C-acetyltransferase [EC:2.3.1.29]	K00639	6	0	2	2	1	1	1	2	1	3	1	2	0	0	0	3	1	0	0	0	1	4	2	1	0	0	1	2	1	1	0	2	0	0	1	1	2	2	0	2	0	2	1	0	1	0	2	0
cysE; serine O-acetyltransferase [EC:2.3.1.30]	K00640	6	1	1	2	1	1	1	0	1	0	1	0	1	1	2	0	1	1	1	2	0	1	0	0	0	2	0	0	0	0	2	0	2	1	0	2	2	0	0	2	1	0	1	3	1	2	2	0
metX; homoserine O-acetyltransferase/O-succinyltransferase [EC:2.3.1.31 2.3.1.46]	K00641	5	0	0	0	0	1	0	3	1	1	0	0	1	1	1	1	0	0	0	1	0	0	2	0	0	0	0	0	0	1	1	0	1	0	0	1	0	0	1	0	0	1	1	1	0	1	1	0
E2.3.1.37, ALAS; 5-aminolevulinate synthase [EC:2.3.1.37]	K00643	0	0	0	0	0	0	0	0	0	0	0	0	0	0	0	0	0	0	0	0	0	0	0	0	0	0	0	0	0	0	0	0	0	0	0	0	0	0	0	0	0	0	0	0	0	0	0	0
fabD; [acyl-carrier-protein] S-malonyltransferase [EC:2.3.1.39]	K00645	5	1	1	0	1	1	1	1	2	1	1	0	1	1	1	1	0	1	1	0	1	1	1	0	1	0	1	1	1	1	1	1	1	1	1	1	1	1	1	1	1	1	4	1	1	1	1	1
pksF; malonyl-ACP decarboxylase	K00646	0	0	0	0	0	0	0	0	0	0	0	0	0	0	0	0	0	0	0	0	0	0	0	0	0	0	0	0	0	0	0	0	0	0	0	0	0	0	0	0	0	0	0	0	0	0	0	0
fabB; 3-oxoacyl-[acyl-carrier-protein] synthase I [EC:2.3.1.41]	K00647	2	1	0	0	0	2	1	0	0	0	0	0	0	0	1	0	0	0	0	0	0	0	0	0	0	0	0	0	0	0	0	3	2	0	0	0	0	0	0	0	0	0	0	0	0	0	0	0
fabH; 3-oxoacyl-[acyl-carrier-protein] synthase III [EC:2.3.1.180]	K00648	17	2	3	1	3	2	2	3	3	8	0	0	1	3	1	2	0	3	1	1	2	5	6	2	1	1	8	2	3	2	2	4	1	0	1	2	3	3	2	4	2	4	1	3	1	1	1	0
GNPAT; glyceronephosphate O-acyltransferase [EC:2.3.1.42]	K00649	0	0	0	0	0	0	0	0	0	0	0	0	0	0	0	0	0	0	0	0	0	0	0	0	0	0	0	0	0	0	0	0	0	0	0	0	0	0	0	0	0	0	0	0	0	0	0	0
metA; homoserine O-succinyltransferase/O-acetyltransferase [EC:2.3.1.46 2.3.1.31]	K00651	0	0	0	1	0	0	0	0	0	0	0	0	0	0	0	0	0	0	0	0	0	0	0	1	0	0	0	0	1	0	0	0	0	0	0	0	1	1	0	1	0	0	0	0	0	0	0	0
bioF; 8-amino-7-oxononanoate synthase [EC:2.3.1.47]	K00652	4	0	3	1	1	1	1	0	1	0	0	0	1	0	0	1	1	0	0	0	1	1	2	0	0	0	2	0	0	0	0	0	0	1	0	1	0	0	0	0	0	0	0	0	1	0	1	0
plsC; 1-acyl-sn-glycerol-3-phosphate acyltransferase [EC:2.3.1.51]	K00655	8	2	1	2	2	3	2	2	3	2	2	1	1	2	1	1	0	0	1	0	1	3	0	2	1	1	3	1	2	2	2	0	2	1	2	1	4	0	2	1	1	2	1	0	1	2	1	0
E2.3.1.54, pflD; formate C-acetyltransferase [EC:2.3.1.54]	K00656	0	0	0	0	0	0	0	0	0	1	3	3	0	0	1	0	0	6	3	3	0	1	2	8	5	13	2	2	1	1	10	1	5	4	3	1	4	1	0	2	4	4	1	14	4	2	2	8
speG, SAT; diamine N-acetyltransferase [EC:2.3.1.57]	K00657	3	0	0	0	0	0	0	0	0	0	0	0	0	0	0	0	0	0	0	0	0	0	0	0	0	0	0	0	1	0	0	1	0	0	0	0	0	1	1	2	0	0	0	1	0	1	0	0
DLST, sucB; 2-oxoglutarate dehydrogenase E2 component (dihydrolipoamide succinyltransferase) [EC:2.3.1.61]	K00658	11	1	0	3	1	2	0	2	0	4	0	0	0	1	0	0	1	0	0	0	0	1	2	0	0	0	1	0	1	0	1	2	0	0	0	0	0	0	1	1	0	2	0	1	0	0	2	0
BAAT; bile acid-CoA:amino acid N-acyltransferase [EC:2.3.1.65 3.1.2.2]	K00659	0	0	0	0	0	0	0	1	0	0	0	0	0	0	0	0	0	0	0	0	0	0	0	0	0	0	0	0	0	0	0	0	0	0	0	0	0	0	0	0	0	0	0	0	0	0	0	0
maa; maltose O-acetyltransferase [EC:2.3.1.79]	K00661	9	0	0	0	0	0	0	0	2	0	0	0	0	0	0	1	0	0	0	1	0	0	0	0	0	0	0	0	1	0	1	0	0	0	0	0	0	0	0	2	0	0	0	0	1	0	1	0
aacC; aminoglycoside 3-N-acetyltransferase [EC:2.3.1.81]	K00662	0	0	0	0	0	0	0	0	0	0	1	0	0	0	0	1	0	0	0	1	0	0	0	3	0	1	1	0	0	0	0	1	0	0	0	0	1	0	0	0	0	0	0	0	0	0	0	0
aacA; aminoglycoside 6'-N-acetyltransferase [EC:2.3.1.82]	K00663	0	0	0	0	0	0	0	0	0	0	0	0	0	0	0	0	0	0	0	0	0	0	0	0	0	0	0	0	0	0	0	0	0	0	0	0	0	0	0	0	0	0	0	0	0	0	0	0
FASN; fatty acid synthase, animal type [EC:2.3.1.85]	K00665	0	0	0	0	0	0	0	0	0	0	0	0	0	0	0	0	0	0	0	0	0	0	0	0	0	0	0	0	0	0	0	0	0	0	0	0	0	0	0	0	0	0	0	0	0	0	0	0
ACSF2; fatty-acyl-CoA synthase [EC:6.2.1.-]	K00666	1	0	0	1	1	1	0	6	0	4	0	4	0	3	2	1	0	2	7	0	0	0	0	0	2	1	0	0	1	0	6	0	18	0	0	0	0	0	1	0	1	2	0	4	11	0	0	3
NAA30, MAK3; N-alpha-acetyltransferase 30 [EC:2.3.1.256]	K00670	0	0	0	0	0	0	0	0	0	0	0	0	0	0	0	0	0	0	0	0	0	0	0	0	0	0	0	0	0	0	0	0	0	0	0	0	0	0	0	0	0	0	0	0	0	0	0	0
NMT; glycylpeptide N-tetradecanoyltransferase [EC:2.3.1.97]	K00671	0	0	0	0	0	0	0	0	0	0	0	0	0	0	0	0	0	0	0	0	0	0	0	0	0	0	0	0	0	0	0	0	0	0	0	0	0	0	0	0	0	0	0	0	0	0	0	0
ftr; formylmethanofuran--tetrahydromethanopterin N-formyltransferase [EC:2.3.1.101]	K00672	0	0	2	0	3	1	0	0	2	0	0	0	0	0	0	0	0	0	0	0	0	0	0	0	0	0	0	0	0	0	0	0	0	0	0	0	0	0	0	0	0	0	0	0	0	0	0	0
astA; arginine N-succinyltransferase [EC:2.3.1.109]	K00673	0	0	0	1	0	1	0	0	0	0	0	0	0	0	0	0	0	0	0	0	0	0	0	0	0	0	0	0	0	0	0	0	0	0	0	0	0	0	0	0	0	0	0	0	0	0	0	0
dapD; 2,3,4,5-tetrahydropyridine-2,6-dicarboxylate N-succinyltransferase [EC:2.3.1.117]	K00674	2	0	0	1	0	0	0	0	0	1	0	0	0	0	0	0	0	1	0	0	0	0	0	0	0	0	0	0	0	0	0	1	0	0	0	0	0	1	1	0	0	0	0	0	0	0	0	0
nhoA; N-hydroxyarylamine O-acetyltransferase [EC:2.3.1.118]	K00675	0	1	0	0	0	0	0	0	0	0	0	0	0	0	0	0	0	0	0	0	0	0	0	0	0	0	0	0	0	0	0	0	0	0	0	0	0	0	0	0	0	0	0	0	0	0	0	0
lpxA; UDP-N-acetylglucosamine acyltransferase [EC:2.3.1.129]	K00677	2	0	1	1	1	2	1	0	1	2	0	0	1	2	1	1	0	0	1	0	1	3	2	2	0	1	2	1	1	1	1	1	1	0	0	0	0	1	0	1	0	2	1	1	0	1	1	0
ytmI; uncharacterized N-acetyltransferase [EC:2.3.1.-]	K00680	4	1	1	0	1	1	0	0	2	0	0	1	1	0	0	0	0	0	0	0	0	0	2	0	0	1	1	0	1	0	0	0	0	0	1	0	0	0	0	0	0	0	0	0	0	0	1	0
ggt; gamma-glutamyltranspeptidase / glutathione hydrolase [EC:2.3.2.2 3.4.19.13]	K00681	4	3	1	0	3	1	1	6	2	5	0	0	1	0	0	1	0	0	1	0	0	2	1	2	0	1	1	2	1	3	3	0	2	0	3	1	1	1	0	1	0	1	1	0	3	0	2	0
GGCT; gamma-glutamylcyclotransferase [EC:4.3.2.9]	K00682	0	0	0	0	0	0	0	0	0	0	0	0	0	0	0	0	0	0	0	0	0	0	0	0	0	0	0	0	0	0	0	0	0	0	0	0	0	0	0	0	0	0	0	0	0	0	0	0
QPCT; glutaminyl-peptide cyclotransferase [EC:2.3.2.5]	K00683	0	1	0	0	1	0	0	1	0	0	0	0	0	0	0	0	0	0	0	0	0	0	0	0	0	0	0	0	0	0	0	0	0	0	0	0	0	0	0	0	0	0	0	0	0	0	0	0
aat; leucyl/phenylalanyl-tRNA---protein transferase [EC:2.3.2.6]	K00684	3	0	1	1	0	0	0	0	2	1	0	0	0	1	0	1	0	0	0	1	0	1	0	1	0	0	1	0	0	0	1	1	0	0	0	0	1	0	1	0	0	0	0	1	0	0	1	0
ATE1; arginyl-tRNA---protein transferase [EC:2.3.2.8]	K00685	0	0	2	0	1	0	1	0	1	0	0	0	0	0	0	1	0	0	0	0	0	0	0	0	0	0	0	0	0	0	0	0	0	0	0	0	0	0	0	0	0	0	0	0	0	0	0	0
PYG, glgP; glycogen phosphorylase [EC:2.4.1.1]	K00688	0	1	1	1	1	1	2	2	5	1	0	0	2	2	2	2	1	1	2	0	0	2	0	3	0	2	1	0	1	0	0	0	1	1	1	1	1	0	0	1	1	0	0	0	0	2	5	0
E2.4.1.7; sucrose phosphorylase [EC:2.4.1.7]	K00690	1	0	0	0	0	0	0	0	0	0	0	1	0	1	1	0	0	1	1	0	2	0	1	0	1	0	1	1	0	0	0	0	1	0	1	0	1	0	0	0	0	0	1	1	0	0	0	0
mapA; maltose phosphorylase [EC:2.4.1.8]	K00691	3	0	0	0	0	0	0	0	0	0	0	0	0	0	0	0	0	0	0	0	0	0	0	0	0	0	0	0	0	0	0	0	0	0	0	0	0	1	0	2	0	0	0	0	0	0	0	0
GYS; glycogen synthase [EC:2.4.1.11]	K00693	0	0	0	0	0	0	0	0	0	0	0	0	0	0	0	0	1	0	0	0	0	0	0	0	0	0	0	0	0	0	0	0	0	0	0	0	0	0	0	1	0	0	0	0	0	0	0	0
bcsA; cellulose synthase (UDP-forming) [EC:2.4.1.12]	K00694	1	0	0	0	0	0	0	1	0	0	0	0	1	0	0	0	0	0	0	0	0	0	0	0	0	0	0	0	0	0	0	0	0	0	0	0	0	0	0	0	0	0	0	0	0	0	0	0
E2.4.1.13; sucrose synthase [EC:2.4.1.13]	K00695	0	0	0	0	0	0	0	0	0	0	0	0	0	0	0	1	0	0	0	0	0	0	0	0	0	0	0	0	0	0	0	0	0	0	0	0	0	0	0	0	0	0	0	0	0	0	0	0
E2.4.1.14; sucrose-phosphate synthase [EC:2.4.1.14]	K00696	0	0	0	0	0	0	1	1	1	0	0	1	1	0	0	1	0	0	0	0	1	0	0	0	0	0	0	0	0	0	0	0	0	0	0	0	0	0	0	0	0	0	0	0	0	0	0	0
otsA; trehalose 6-phosphate synthase [EC:2.4.1.15 2.4.1.347]	K00697	0	0	0	0	0	0	0	0	0	0	0	0	0	0	0	0	0	1	0	0	0	0	0	0	0	0	0	0	0	0	0	0	0	0	0	0	0	0	0	0	2	0	0	0	0	0	0	0
UGT; glucuronosyltransferase [EC:2.4.1.17]	K00699	0	0	0	0	0	0	0	0	0	0	0	0	0	0	0	0	0	0	0	0	0	0	0	0	0	0	0	0	0	0	0	0	0	0	0	0	0	0	0	0	0	0	0	0	0	0	0	0
GBE1, glgB; 1,4-alpha-glucan branching enzyme [EC:2.4.1.18]	K00700	3	0	1	0	1	1	0	1	6	0	0	0	1	1	1	1	0	0	1	0	0	2	2	0	0	0	1	0	0	0	0	0	1	0	0	0	0	2	1	2	1	1	0	0	1	0	0	0
cgt; cyclomaltodextrin glucanotransferase [EC:2.4.1.19]	K00701	0	0	0	0	0	0	0	0	0	0	0	0	0	0	0	0	0	0	0	0	0	0	0	0	0	0	0	0	0	0	0	0	0	0	0	0	0	0	0	0	0	0	0	0	0	0	0	0
E2.4.1.20; cellobiose phosphorylase [EC:2.4.1.20]	K00702	0	0	0	0	0	0	0	0	0	0	0	0	0	0	0	0	0	0	0	0	0	0	1	1	1	0	0	0	1	0	1	0	0	0	0	0	0	0	0	1	0	0	0	0	0	0	1	0
glgA; starch synthase [EC:2.4.1.21]	K00703	5	1	1	1	1	1	1	1	2	0	0	0	1	1	1	1	0	1	1	1	0	1	1	0	0	1	0	1	2	1	0	1	1	0	1	0	1	1	0	1	0	0	0	0	1	1	0	0
malQ; 4-alpha-glucanotransferase [EC:2.4.1.25]	K00705	0	0	1	1	1	2	0	0	0	2	0	0	1	0	0	1	0	0	0	0	0	0	0	0	0	0	0	0	0	0	0	0	1	0	1	0	1	0	0	2	0	1	0	0	0	0	1	0
ABO; histo-blood group ABO system transferase [EC:2.4.1.40 2.4.1.37]	K00709	0	0	0	0	0	0	0	0	0	0	0	0	0	0	0	0	0	0	0	0	0	0	0	0	0	0	0	0	0	0	0	0	0	0	0	0	0	0	0	0	0	0	0	0	0	0	0	0
tagE; poly(glycerol-phosphate) alpha-glucosyltransferase [EC:2.4.1.52]	K00712	0	0	0	0	0	0	0	0	0	0	0	0	0	0	0	0	0	0	0	0	0	0	1	0	0	0	0	0	0	0	0	0	0	0	0	0	0	0	0	0	0	0	0	0	0	0	0	0
UGCG; ceramide glucosyltransferase [EC:2.4.1.80]	K00720	0	0	0	1	0	0	0	0	0	0	0	0	0	0	0	0	0	0	0	0	0	0	0	0	0	0	0	0	0	0	0	0	0	0	0	0	0	0	0	0	0	0	0	0	0	0	0	0
DPM1; dolichol-phosphate mannosyltransferase [EC:2.4.1.83]	K00721	4	4	5	1	5	2	3	3	3	6	1	3	1	0	0	3	1	3	0	2	0	4	5	7	1	3	2	0	2	0	4	2	4	1	1	0	0	1	1	2	0	4	0	0	4	1	2	0
B4GALNT1, GALGT; (N-Acetylneuraminyl)-galactosylglucosylceramide N-acetylgalactosaminyltransferase [EC:2.4.1.92]	K00725	0	0	0	0	0	0	0	0	0	0	0	0	0	0	0	0	0	0	0	0	0	0	0	0	0	0	0	0	0	0	0	0	0	0	0	0	0	0	0	0	0	0	0	0	0	0	0	0
POMT, pmt; dolichyl-phosphate-mannose-protein mannosyltransferase [EC:2.4.1.109]	K00728	0	0	0	0	0	0	0	0	0	0	0	0	0	0	0	0	0	0	0	0	0	0	0	0	0	0	0	0	0	0	0	0	0	0	0	0	0	0	0	0	0	0	0	0	0	0	0	0
ALG5; dolichyl-phosphate beta-glucosyltransferase [EC:2.4.1.117]	K00729	0	0	0	0	0	0	0	2	1	1	0	1	0	0	0	0	0	0	0	0	0	1	0	1	0	0	1	1	0	0	0	0	0	0	0	1	0	0	0	0	1	0	0	1	0	0	1	0
MGAT3; beta-1,4-mannosyl-glycoprotein beta-1,4-N-acetylglucosaminyltransferase [EC:2.4.1.144]	K00737	0	0	0	0	0	0	0	0	0	0	0	0	0	0	0	0	0	0	0	0	0	0	0	0	0	0	0	0	0	0	0	0	0	0	0	0	0	0	0	0	0	0	0	0	0	0	1	0
MGAT4A_B; alpha-1,3-mannosylglycoprotein beta-1,4-N-acetylglucosaminyltransferase A/B [EC:2.4.1.145]	K00738	0	0	0	0	0	0	0	1	0	0	0	0	0	0	0	0	0	0	0	0	0	0	0	0	0	0	0	0	0	0	0	0	0	0	0	0	0	0	0	0	0	0	0	0	0	0	0	0
GGTA1; N-acetyllactosaminide 3-alpha-galactosyltransferase [EC:2.4.1.87]	K00743	0	0	0	0	0	0	0	0	0	0	0	0	0	0	0	0	0	0	0	0	0	0	0	0	0	0	0	0	0	0	0	0	0	0	0	0	0	0	0	0	0	0	0	0	0	0	0	0
lpxB; lipid-A-disaccharide synthase [EC:2.4.1.182]	K00748	3	1	1	0	1	1	1	1	1	0	0	1	1	1	1	2	0	0	0	1	1	1	0	1	0	1	2	1	0	1	1	1	1	0	0	1	0	1	0	0	0	1	1	1	1	1	1	0
GYG1, GYG2; glycogenin [EC:2.4.1.186]	K00750	0	0	0	0	0	0	0	0	0	0	0	0	0	0	0	0	0	0	0	0	0	0	0	0	0	0	0	0	0	0	0	0	0	0	0	0	0	0	0	0	0	0	0	0	0	0	0	0
hasA; hyaluronan synthase [EC:2.4.1.212]	K00752	0	0	0	0	0	0	1	0	0	0	0	0	0	0	0	0	0	0	0	0	0	0	0	0	0	0	0	1	0	0	0	0	0	0	0	0	0	0	0	0	0	0	0	0	0	0	0	0
bshA; L-malate glycosyltransferase [EC:2.4.1.-]	K00754	10	0	0	0	0	0	3	0	1	1	0	0	1	0	0	1	0	0	0	0	0	1	3	0	0	0	3	0	0	0	3	2	1	0	0	0	0	0	0	1	0	1	0	0	0	0	0	0
pdp; pyrimidine-nucleoside phosphorylase [EC:2.4.2.2]	K00756	0	2	0	1	1	2	0	0	1	1	0	1	0	0	0	0	0	0	0	0	0	0	0	0	0	0	0	1	1	1	0	0	0	0	0	0	1	0	0	0	0	0	0	0	0	0	0	0
udp, UPP; uridine phosphorylase [EC:2.4.2.3]	K00757	3	0	0	0	0	0	0	0	0	1	0	0	0	0	0	0	0	1	0	0	0	0	0	0	0	0	0	0	0	0	0	1	0	0	0	0	1	0	0	1	0	1	0	0	0	0	0	0
deoA, TYMP; thymidine phosphorylase [EC:2.4.2.4]	K00758	0	0	0	0	1	0	0	0	1	0	0	0	0	0	0	0	0	0	0	0	0	0	0	0	0	0	0	0	0	0	0	0	0	0	0	0	0	0	1	0	0	0	0	0	0	0	0	0
APRT, apt; adenine phosphoribosyltransferase [EC:2.4.2.7]	K00759	0	1	1	1	1	1	1	1	1	1	0	1	1	0	0	2	0	0	0	1	0	1	2	1	0	0	0	0	0	0	0	0	0	1	0	1	0	1	0	1	0	0	0	2	0	1	1	1
hprT, hpt, HPRT1; hypoxanthine phosphoribosyltransferase [EC:2.4.2.8]	K00760	3	1	1	1	1	1	0	0	1	1	0	1	0	1	0	1	0	0	0	0	1	0	0	0	0	2	0	1	1	1	1	1	1	1	0	0	1	0	1	1	1	1	1	0	1	0	2	0
upp, UPRT; uracil phosphoribosyltransferase [EC:2.4.2.9]	K00761	4	1	0	0	0	1	0	1	1	1	0	0	1	0	0	0	0	0	0	0	0	0	0	0	0	0	0	0	1	0	0	0	0	0	0	0	1	0	1	0	0	1	0	0	0	0	0	0
pyrE; orotate phosphoribosyltransferase [EC:2.4.2.10]	K00762	3	1	1	1	1	0	1	0	1	1	0	1	1	0	0	1	1	0	1	1	1	1	1	0	0	1	2	1	0	1	1	1	0	1	0	1	1	1	1	1	1	1	1	1	1	2	1	1
pncB, NAPRT1; nicotinate phosphoribosyltransferase [EC:6.3.4.21]	K00763	0	0	0	0	0	0	0	1	0	0	0	0	0	1	0	0	0	0	0	1	0	0	1	1	0	1	1	0	0	1	1	0	1	0	0	0	1	0	0	0	0	0	0	1	1	0	0	0
purF, PPAT; amidophosphoribosyltransferase [EC:2.4.2.14]	K00764	4	1	1	2	1	1	1	1	1	3	0	2	2	3	1	2	0	1	2	1	1	2	2	1	1	0	4	2	1	1	1	2	1	2	0	2	1	2	1	3	1	2	1	5	1	2	2	0
hisG; ATP phosphoribosyltransferase [EC:2.4.2.17]	K00765	3	1	1	1	1	1	1	1	1	0	0	1	0	1	1	1	0	0	1	0	0	2	2	1	2	1	0	0	1	0	0	0	2	1	1	0	1	1	1	1	2	0	1	1	1	1	1	0
trpD; anthranilate phosphoribosyltransferase [EC:2.4.2.18]	K00766	4	0	1	0	1	1	1	1	1	1	1	0	2	1	1	2	0	0	1	0	1	1	1	2	0	1	1	0	0	0	1	0	1	1	0	1	0	1	2	1	1	0	1	1	1	1	1	0
nadC, QPRT; nicotinate-nucleotide pyrophosphorylase (carboxylating) [EC:2.4.2.19]	K00767	3	1	1	1	0	1	1	0	1	1	0	1	0	1	0	1	1	0	0	1	1	1	0	1	0	0	1	1	1	0	2	1	1	0	0	1	1	1	1	0	0	1	1	2	1	1	1	0
E2.4.2.21, cobU, cobT; nicotinate-nucleotide--dimethylbenzimidazole phosphoribosyltransferase [EC:2.4.2.21]	K00768	0	0	0	0	1	0	1	0	0	0	0	1	0	1	1	1	0	0	0	0	1	0	0	1	0	1	0	0	0	0	0	0	1	1	0	0	1	1	0	0	1	0	1	0	0	0	0	0
gpt; xanthine phosphoribosyltransferase [EC:2.4.2.22]	K00769	0	0	0	0	0	0	0	0	0	0	0	0	0	0	0	0	0	0	0	0	0	0	0	0	0	0	0	0	0	0	0	0	0	0	0	0	0	0	0	0	0	0	0	0	0	0	0	0
mtaP, MTAP; 5'-methylthioadenosine phosphorylase [EC:2.4.2.28]	K00772	0	1	0	1	0	1	2	0	0	2	0	1	0	0	0	1	0	2	0	0	0	0	0	0	2	0	0	1	1	0	0	0	0	1	0	1	0	0	1	1	1	0	0	3	1	2	1	1
tgt, QTRT1; queuine tRNA-ribosyltransferase [EC:2.4.2.29]	K00773	2	3	1	2	1	2	1	2	1	2	0	0	1	0	1	1	0	0	1	0	1	1	2	1	0	1	1	1	2	1	2	1	1	1	0	0	1	1	1	1	1	1	0	2	1	1	1	0
lldG; L-lactate dehydrogenase complex protein LldG	K00782	0	1	0	0	0	0	0	1	1	1	0	0	0	1	0	0	0	0	2	0	0	1	1	0	0	0	0	0	0	0	0	1	0	0	0	0	0	0	0	1	1	1	1	1	0	0	0	0
rlmH; 23S rRNA (pseudouridine1915-N3)-methyltransferase [EC:2.1.1.177]	K00783	2	0	0	1	0	0	0	1	0	1	0	0	0	0	1	1	0	0	0	0	0	0	0	0	0	0	0	1	0	0	0	0	1	0	0	0	0	0	0	1	0	1	0	0	0	0	0	0
rnz; ribonuclease Z [EC:3.1.26.11]	K00784	3	0	1	1	1	0	1	1	1	0	0	1	1	2	0	0	0	1	1	0	1	2	1	5	0	1	0	1	0	0	3	0	0	0	2	2	1	1	0	2	0	1	0	2	0	0	1	0
E2.4.-.-; glycosyltransferase [EC:2.4.-.-]	K00786	1	0	0	0	0	0	1	0	0	2	0	0	0	0	0	1	0	0	1	2	0	1	0	0	0	0	2	0	0	0	0	0	1	0	0	0	1	0	0	0	0	0	0	0	0	0	1	0
FDPS; farnesyl diphosphate synthase [EC:2.5.1.1 2.5.1.10]	K00787	0	0	0	0	0	0	0	0	0	0	0	0	0	0	0	0	0	0	0	0	0	0	0	0	0	0	0	0	0	0	0	0	0	0	0	0	0	0	0	0	0	0	0	0	0	0	0	0
thiE; thiamine-phosphate pyrophosphorylase [EC:2.5.1.3]	K00788	0	0	1	1	2	0	1	2	1	1	0	0	1	1	1	1	0	0	0	1	0	1	1	1	0	0	1	1	0	0	1	0	0	1	0	1	0	1	0	0	1	2	2	0	2	2	1	1
metK; S-adenosylmethionine synthetase [EC:2.5.1.6]	K00789	3	2	1	1	2	1	1	1	0	1	0	0	1	1	1	1	0	3	0	0	1	1	1	0	1	1	1	1	1	1	1	1	1	1	1	0	1	1	1	1	0	1	1	1	0	2	1	0
murA; UDP-N-acetylglucosamine 1-carboxyvinyltransferase [EC:2.5.1.7]	K00790	3	0	0	1	0	1	1	0	1	1	1	1	0	1	1	1	1	0	1	0	1	2	2	1	1	0	0	1	0	1	1	1	1	0	1	0	1	1	1	0	0	1	0	1	1	2	2	0
miaA, TRIT1; tRNA dimethylallyltransferase [EC:2.5.1.75]	K00791	3	2	1	1	1	1	0	2	1	1	0	0	1	1	0	1	0	0	1	2	1	1	1	1	0	0	2	1	1	1	2	1	1	1	0	1	1	2	1	2	0	1	2	1	0	1	2	1
ribE, RIB5; riboflavin synthase [EC:2.5.1.9]	K00793	3	0	1	1	0	2	1	0	1	1	0	0	1	1	1	1	0	1	0	0	1	1	1	1	1	0	0	1	0	0	1	0	1	1	0	1	1	0	1	1	1	0	1	2	1	1	1	1
ribH, RIB4; 6,7-dimethyl-8-ribityllumazine synthase [EC:2.5.1.78]	K00794	2	1	1	1	1	1	1	1	1	1	0	1	0	1	1	1	0	0	1	0	1	1	0	0	1	0	1	1	0	0	1	0	1	0	0	0	1	0	1	1	1	0	1	1	0	1	1	0
ispA; farnesyl diphosphate synthase [EC:2.5.1.1 2.5.1.10]	K00795	0	0	0	0	0	0	0	0	0	0	0	0	0	0	0	0	0	0	0	0	0	0	0	0	0	0	0	0	0	0	0	0	0	0	0	0	0	0	0	0	0	0	0	0	0	0	0	0
folP; dihydropteroate synthase [EC:2.5.1.15]	K00796	3	0	1	1	1	0	1	0	1	1	0	1	1	1	0	1	0	0	0	0	1	1	0	1	1	0	1	1	1	1	1	1	1	0	0	1	0	1	1	1	2	1	1	2	1	1	1	1
speE, SRM; spermidine synthase [EC:2.5.1.16]	K00797	1	2	0	2	3	0	5	2	2	4	1	1	1	2	1	0	1	4	1	2	1	2	2	6	0	1	4	4	2	0	3	2	3	1	0	1	0	1	0	1	2	1	2	4	1	0	4	1
MMAB, pduO; cob(I)alamin adenosyltransferase [EC:2.5.1.17]	K00798	2	1	1	1	1	1	0	1	1	1	0	0	1	0	0	0	0	0	0	1	0	1	0	0	0	0	1	0	1	1	0	1	0	0	0	0	1	0	1	1	0	1	0	0	0	1	1	1
GST, gst; glutathione S-transferase [EC:2.5.1.18]	K00799	0	0	0	2	0	0	0	0	0	3	0	0	3	0	0	0	0	0	0	0	0	0	0	0	0	0	0	0	0	0	0	0	2	0	0	0	0	0	0	0	0	0	0	0	0	0	0	0
aroA; 3-phosphoshikimate 1-carboxyvinyltransferase [EC:2.5.1.19]	K00800	4	2	1	2	1	1	1	1	1	1	1	1	1	1	1	1	1	1	1	1	1	1	1	1	1	1	2	0	1	0	1	1	2	1	0	1	1	3	1	2	1	1	1	1	1	1	1	1
FDFT1; farnesyl-diphosphate farnesyltransferase [EC:2.5.1.21]	K00801	0	0	0	0	0	0	1	0	0	0	0	0	0	0	0	0	0	1	0	0	0	0	0	1	0	0	0	0	0	0	1	0	0	0	1	0	0	0	0	0	0	0	0	0	0	0	0	0
AGPS, agpS; alkyldihydroxyacetonephosphate synthase [EC:2.5.1.26]	K00803	0	0	0	1	0	0	0	0	0	2	0	0	0	0	1	0	0	0	0	0	0	0	0	0	0	0	0	0	1	0	1	0	2	0	0	0	0	0	0	1	0	0	0	1	1	0	0	0
GGPS1; geranylgeranyl diphosphate synthase, type III [EC:2.5.1.1 2.5.1.10 2.5.1.29]	K00804	0	0	0	0	0	0	0	0	0	0	0	0	0	0	0	0	0	0	0	0	0	0	0	0	0	0	0	0	0	0	0	0	0	0	0	0	0	0	0	0	0	0	0	0	0	0	0	0
hepST; heptaprenyl diphosphate synthase [EC:2.5.1.30]	K00805	0	0	0	0	0	0	1	0	0	0	0	0	0	0	0	0	0	0	0	0	0	0	0	0	0	1	0	0	0	0	0	0	0	1	0	1	3	0	1	0	0	0	0	0	0	0	0	0
uppS; undecaprenyl diphosphate synthase [EC:2.5.1.31]	K00806	2	1	1	1	1	1	1	1	1	1	0	0	0	1	0	1	0	0	0	0	1	1	2	1	0	0	1	1	1	1	1	1	1	1	1	1	1	1	1	1	1	1	1	1	1	1	1	0
hss; homospermidine synthase [EC:2.5.1.44]	K00808	0	0	0	0	0	1	0	0	1	0	0	0	0	0	0	0	0	0	0	0	0	0	0	0	0	0	0	0	0	0	0	0	0	0	0	0	0	0	0	0	0	0	0	0	0	0	0	0
DHPS, dys; deoxyhypusine synthase [EC:2.5.1.46]	K00809	2	0	1	0	1	1	1	0	0	1	0	0	0	0	0	1	0	2	0	0	1	1	1	1	0	0	1	0	0	0	1	0	0	0	0	1	0	0	0	0	0	2	0	1	1	0	0	0
aspB; aspartate aminotransferase [EC:2.6.1.1]	K00812	6	1	3	1	1	1	1	0	2	6	1	1	1	0	0	1	1	2	2	0	0	2	3	2	1	0	4	1	2	1	0	2	2	0	0	2	1	1	0	2	0	3	0	0	2	1	3	0
aspC; aspartate aminotransferase [EC:2.6.1.1]	K00813	0	0	0	0	2	0	0	0	1	0	0	0	0	0	0	0	0	0	0	1	0	0	0	0	0	0	0	0	0	0	0	0	0	0	0	0	0	0	0	0	0	0	0	0	0	0	0	0
GPT, ALT; alanine transaminase [EC:2.6.1.2]	K00814	0	0	0	0	0	0	0	0	0	0	0	0	0	0	0	0	0	0	0	0	0	0	0	0	0	0	0	0	0	0	0	0	0	0	0	0	0	0	0	0	0	0	0	0	0	0	0	0
hisC; histidinol-phosphate aminotransferase [EC:2.6.1.9]	K00817	3	3	2	3	1	4	1	1	1	2	0	0	1	1	0	1	0	0	2	1	1	1	1	0	0	1	0	1	2	0	2	0	2	2	1	0	2	1	2	1	1	1	1	1	0	2	1	0
E2.6.1.11, argD; acetylornithine aminotransferase [EC:2.6.1.11]	K00818	3	0	1	0	1	2	1	0	0	1	0	0	1	1	0	0	0	0	0	1	1	0	0	0	0	1	0	0	1	1	2	0	0	0	1	0	0	0	1	1	0	0	1	2	0	0	2	0
rocD, OAT; ornithine--oxo-acid transaminase [EC:2.6.1.13]	K00819	4	0	0	0	0	0	1	1	0	0	0	0	0	1	0	0	0	0	0	0	0	0	0	0	0	0	0	1	1	1	0	1	1	0	0	0	0	0	0	1	0	1	0	0	0	0	0	0
glmS, GFPT; glucosamine---fructose-6-phosphate aminotransferase (isomerizing) [EC:2.6.1.16]	K00820	4	1	0	1	1	1	1	2	2	2	0	1	1	2	0	1	0	1	2	1	1	1	1	0	0	0	2	2	1	1	2	1	0	2	2	0	1	1	2	1	1	1	1	3	2	1	1	0
argD; acetylornithine/N-succinyldiaminopimelate aminotransferase [EC:2.6.1.11 2.6.1.17]	K00821	0	0	0	1	0	2	1	0	0	1	0	0	0	0	0	1	0	0	0	0	0	0	0	1	1	1	0	0	0	0	0	0	0	1	0	0	1	0	0	0	1	1	1	0	0	1	1	0
E2.6.1.18; beta-alanine--pyruvate transaminase [EC:2.6.1.18]	K00822	0	0	0	0	0	0	0	0	0	0	0	0	0	0	0	0	0	0	0	0	0	0	0	0	0	0	0	0	0	0	0	0	0	0	0	0	0	0	0	0	0	0	0	0	0	0	0	0
puuE; 4-aminobutyrate aminotransferase [EC:2.6.1.19]	K00823	1	0	1	1	1	0	0	1	2	1	0	1	0	0	0	0	0	1	3	0	0	2	2	1	2	1	3	0	0	2	2	0	2	0	5	0	2	0	0	0	0	0	0	1	0	0	1	0
dat; D-alanine transaminase [EC:2.6.1.21]	K00824	0	0	1	0	0	0	0	1	0	1	0	0	0	0	0	0	0	0	1	0	0	0	1	0	0	0	1	0	0	1	0	0	0	0	0	0	1	0	0	2	0	0	0	0	0	0	1	0
E2.6.1.42, ilvE; branched-chain amino acid aminotransferase [EC:2.6.1.42]	K00826	7	2	1	1	3	2	3	1	4	1	1	1	0	2	1	3	2	0	3	1	1	2	2	2	0	2	3	3	2	0	2	2	3	1	1	2	2	0	1	4	2	2	1	3	0	1	2	2
AGXT2; alanine-glyoxylate transaminase / (R)-3-amino-2-methylpropionate-pyruvate transaminase [EC:2.6.1.44 2.6.1.40]	K00827	0	1	0	0	0	0	0	0	0	0	0	0	0	0	0	0	0	0	0	0	0	0	0	0	0	0	0	0	0	0	0	0	1	0	0	0	0	0	0	0	0	0	0	0	0	0	0	0
AGXT; alanine-glyoxylate transaminase / serine-glyoxylate transaminase / serine-pyruvate transaminase [EC:2.6.1.44 2.6.1.45 2.6.1.51]	K00830	0	1	1	0	2	1	0	2	2	0	0	2	1	0	0	0	0	0	1	0	0	1	1	1	0	1	1	0	0	0	1	0	0	0	0	0	0	0	0	0	0	1	1	2	1	0	0	0
serC, PSAT1; phosphoserine aminotransferase [EC:2.6.1.52]	K00831	2	0	0	0	1	1	0	0	1	2	0	0	0	0	0	1	0	0	0	0	1	1	0	1	0	1	0	0	0	0	1	1	1	1	0	0	1	0	1	1	0	1	1	1	0	1	0	0
tyrB; aromatic-amino-acid transaminase [EC:2.6.1.57]	K00832	0	0	0	0	2	0	0	1	0	0	0	0	0	0	0	0	0	0	0	0	0	0	0	0	0	0	0	0	0	0	0	0	0	0	0	0	0	0	0	0	0	0	0	0	0	0	0	0
bioA; adenosylmethionine---8-amino-7-oxononanoate aminotransferase [EC:2.6.1.62]	K00833	2	0	0	2	2	0	1	0	1	1	1	0	1	0	0	1	0	1	0	0	1	2	0	0	0	0	0	0	0	0	0	0	0	1	0	0	0	0	0	0	0	0	0	1	1	0	1	0
avtA; valine--pyruvate aminotransferase [EC:2.6.1.66]	K00835	0	0	0	0	0	0	0	0	0	0	0	0	0	0	0	0	0	0	0	0	0	0	0	0	0	0	0	0	0	0	0	0	0	0	0	1	0	0	0	0	0	0	0	0	0	0	1	0
ectB, dat; diaminobutyrate-2-oxoglutarate transaminase [EC:2.6.1.76]	K00836	0	0	0	0	0	1	0	0	1	0	0	0	0	0	0	0	0	0	0	0	0	0	0	0	0	0	0	0	0	0	0	0	0	0	0	0	0	0	0	0	0	0	0	0	0	0	0	0
ISS1, VAS1; aromatic aminotransferase [EC:2.6.1.-]	K00837	1	1	0	1	0	1	0	4	1	5	2	2	0	0	0	1	1	0	1	2	0	1	1	0	0	0	1	3	0	0	1	0	2	0	1	0	1	0	0	0	1	4	1	2	0	1	1	0
pucG; (S)-ureidoglycine---glyoxylate transaminase [EC:2.6.1.112]	K00839	0	0	0	0	0	0	0	0	0	0	0	0	0	0	0	0	0	0	0	0	0	0	0	0	0	0	0	0	0	0	0	0	0	0	0	0	0	0	0	0	0	0	0	0	0	0	0	0
astC; succinylornithine aminotransferase [EC:2.6.1.81]	K00840	0	0	0	0	0	0	0	0	0	0	0	0	0	0	0	0	0	0	0	0	0	0	0	0	0	0	0	0	0	0	0	0	0	0	0	0	0	0	0	0	0	0	0	0	0	0	0	0
patA; aminotransferase [EC:2.6.1.-]	K00841	0	0	0	0	0	0	0	0	0	0	0	0	0	0	0	0	0	0	0	0	0	0	0	0	0	0	0	0	0	0	0	0	0	0	0	0	0	0	0	0	0	0	0	0	0	0	0	0
E2.6.1.-E, patB; aminotransferase [EC:2.6.1.-]	K00842	0	0	0	0	0	0	0	0	0	0	0	0	0	0	0	0	0	0	0	0	0	0	0	0	0	0	0	0	0	0	0	0	0	0	0	0	0	0	0	0	0	0	0	0	0	0	0	0
HK; hexokinase [EC:2.7.1.1]	K00844	0	0	0	0	0	0	0	0	0	0	0	0	0	0	0	0	0	0	0	0	0	0	0	0	0	0	0	0	0	0	0	0	0	0	0	0	1	0	0	1	0	0	0	0	0	0	0	0
glk; glucokinase [EC:2.7.1.2]	K00845	2	0	3	1	2	2	1	1	3	1	0	0	1	0	0	1	3	0	1	1	0	3	3	2	0	2	3	1	1	1	1	1	0	1	1	0	3	3	1	2	3	1	0	1	1	2	3	1
E2.7.1.4, scrK; fructokinase [EC:2.7.1.4]	K00847	1	0	0	0	0	1	1	1	1	0	0	2	2	1	0	1	0	0	2	1	1	1	0	1	0	0	0	0	0	1	1	1	0	0	0	0	0	1	1	3	0	1	1	0	0	0	1	0
rhaB; rhamnulokinase [EC:2.7.1.5]	K00848	0	2	1	0	1	1	0	0	1	0	0	0	0	0	0	0	1	0	0	0	0	0	0	1	1	1	1	0	0	0	1	0	0	0	0	1	1	0	0	1	0	0	0	2	0	0	1	0
galK; galactokinase [EC:2.7.1.6]	K00849	3	1	0	0	0	1	0	0	0	0	1	0	0	0	0	0	0	0	0	3	0	1	3	1	1	2	3	2	0	1	1	1	0	0	1	1	2	1	0	1	0	1	0	2	1	0	2	0
pfkA, PFK; 6-phosphofructokinase 1 [EC:2.7.1.11]	K00850	1	2	1	1	1	1	1	2	3	1	2	0	0	1	2	1	1	0	0	2	1	2	1	2	0	2	4	2	1	0	1	2	2	4	1	2	3	3	1	1	0	2	1	3	0	2	2	1
E2.7.1.12, gntK, idnK; gluconokinase [EC:2.7.1.12]	K00851	0	0	1	0	0	2	0	0	0	0	0	0	0	0	0	0	0	0	0	0	0	0	0	0	0	0	0	0	0	0	0	0	0	0	0	0	2	0	0	0	0	0	0	0	0	0	0	0
rbsK, RBKS; ribokinase [EC:2.7.1.15]	K00852	1	2	1	0	0	1	0	0	1	1	0	1	0	1	0	0	0	0	0	1	0	1	0	1	0	1	3	0	1	0	4	0	0	0	1	2	2	1	2	1	0	0	0	1	1	0	1	0
araB; L-ribulokinase [EC:2.7.1.16]	K00853	2	1	0	0	1	0	0	0	0	0	0	0	0	0	0	0	0	0	0	2	0	1	0	1	0	1	2	1	0	0	1	0	0	0	0	1	1	1	0	1	0	0	0	1	0	0	0	0
xylB, XYLB; xylulokinase [EC:2.7.1.17]	K00854	3	1	1	1	1	3	0	0	2	1	0	1	0	0	1	0	1	0	0	3	0	4	3	4	1	2	6	1	0	0	4	0	3	0	0	3	11	0	2	3	0	1	0	0	0	0	5	0
PRK, prkB; phosphoribulokinase [EC:2.7.1.19]	K00855	0	0	0	0	0	0	0	0	0	0	0	0	1	0	0	0	0	0	0	0	0	0	0	0	0	0	0	0	0	0	0	1	0	1	0	0	0	0	0	0	0	0	0	0	0	0	0	0
E2.7.1.20, ADK; adenosine kinase [EC:2.7.1.20]	K00856	0	0	0	0	0	0	0	0	0	0	0	0	0	0	0	0	0	0	0	0	0	0	0	0	0	0	0	0	0	0	0	0	1	0	1	0	0	0	1	0	0	0	0	0	0	0	0	0
tdk, TK; thymidine kinase [EC:2.7.1.21]	K00857	5	1	1	1	1	1	0	1	1	2	0	0	0	0	0	0	0	1	1	0	0	0	0	0	0	0	0	0	1	1	0	1	0	0	1	0	1	1	1	1	0	1	0	0	0	0	0	0
ppnK, NADK; NAD+ kinase [EC:2.7.1.23]	K00858	3	1	2	1	1	1	1	1	1	1	0	1	2	1	0	1	1	1	0	0	0	1	1	1	0	0	2	1	1	1	1	1	1	1	2	1	1	1	1	2	1	1	0	1	1	0	1	1
coaE; dephospho-CoA kinase [EC:2.7.1.24]	K00859	2	0	1	1	1	1	1	0	1	1	0	0	1	1	0	1	0	0	0	0	1	1	1	1	0	1	2	1	1	0	0	1	0	1	0	0	1	1	1	1	0	1	0	1	2	1	1	1
cysC; adenylylsulfate kinase [EC:2.7.1.25]	K00860	0	0	0	1	1	1	0	0	1	0	0	0	1	0	0	0	0	1	0	1	1	2	1	1	0	0	1	1	0	0	4	1	1	0	0	0	0	0	0	1	0	1	0	0	1	0	2	0
RFK, FMN1; riboflavin kinase [EC:2.7.1.26]	K00861	0	0	0	0	0	0	0	0	0	0	0	0	0	0	0	0	0	0	0	0	0	0	0	0	0	0	0	0	0	0	0	0	0	0	0	0	0	0	0	0	0	0	0	1	0	0	0	0
DAK, TKFC; triose/dihydroxyacetone kinase / FAD-AMP lyase (cyclizing) [EC:2.7.1.28 2.7.1.29 4.6.1.15]	K00863	0	0	0	0	0	1	0	0	0	0	0	0	0	0	0	0	0	0	0	0	0	0	0	0	0	0	0	0	0	0	0	0	0	0	0	0	0	0	1	0	0	0	0	0	0	0	0	0
glpK, GK; glycerol kinase [EC:2.7.1.30]	K00864	0	1	1	1	1	1	0	1	1	1	0	1	1	0	0	0	0	0	1	1	0	1	1	2	1	0	1	0	1	1	2	0	0	0	0	1	3	1	1	3	0	0	0	2	1	0	1	0
glxK, garK; glycerate 2-kinase [EC:2.7.1.165]	K00865	1	1	0	0	0	1	0	0	0	0	0	0	0	0	0	0	0	0	0	1	0	0	0	1	0	1	0	0	0	0	0	0	0	0	0	0	1	0	1	0	0	0	0	0	0	0	1	0
coaA; type I pantothenate kinase [EC:2.7.1.33]	K00867	0	0	0	0	0	0	0	0	0	0	0	0	0	0	0	0	0	0	0	0	0	0	0	0	0	0	0	0	0	0	0	0	0	0	0	0	0	0	0	0	0	0	0	0	0	0	0	0
pdxK, pdxY; pyridoxine kinase [EC:2.7.1.35]	K00868	0	0	0	0	0	0	0	0	0	0	0	0	0	0	0	0	0	0	0	0	0	0	0	0	0	0	0	0	0	0	0	0	0	0	0	0	1	0	0	0	0	0	0	0	0	0	0	0
E2.7.1.36, MVK, mvaK1; mevalonate kinase [EC:2.7.1.36]	K00869	1	0	0	1	0	0	0	0	0	1	0	0	0	0	0	0	0	0	0	0	0	0	0	1	0	0	0	0	0	0	0	1	0	0	1	0	2	0	0	1	0	1	0	0	0	0	1	0
E2.7.1.37; protein kinase [EC:2.7.1.37]	K00870	0	0	0	0	0	0	0	0	0	1	0	1	0	0	0	0	0	0	0	0	0	0	0	0	0	0	0	0	1	0	0	0	0	0	0	0	0	0	0	0	0	0	0	0	0	0	0	0
thrB1; homoserine kinase [EC:2.7.1.39]	K00872	4	0	0	1	0	1	0	1	0	0	0	0	0	0	0	0	0	0	0	0	0	0	0	0	0	0	0	0	1	0	0	0	0	0	0	0	0	2	1	0	0	0	0	0	0	0	0	1
PK, pyk; pyruvate kinase [EC:2.7.1.40]	K00873	4	1	1	1	1	1	1	1	0	1	0	0	1	0	1	1	0	0	2	1	0	2	1	1	1	1	0	0	1	0	1	0	1	1	2	0	1	1	1	1	1	2	1	1	1	1	1	1
kdgK; 2-dehydro-3-deoxygluconokinase [EC:2.7.1.45]	K00874	5	0	1	0	2	1	0	0	2	1	0	0	0	0	0	0	0	0	1	1	0	0	0	0	1	0	1	0	0	0	0	0	1	0	0	2	2	0	0	3	0	0	0	0	0	0	2	0
udk, UCK; uridine kinase [EC:2.7.1.48]	K00876	3	0	0	1	0	0	0	1	0	1	0	0	0	0	0	0	0	0	0	0	0	0	0	0	0	0	0	0	3	2	1	3	0	1	0	1	2	3	0	2	0	2	0	0	0	0	2	0
thiM; hydroxyethylthiazole kinase [EC:2.7.1.50]	K00878	0	0	0	0	0	0	0	0	0	0	0	0	0	0	0	0	0	0	0	0	0	0	0	0	0	0	0	1	0	0	0	0	0	0	0	0	0	1	0	0	0	0	2	1	0	0	0	0
fucK; L-fuculokinase [EC:2.7.1.51]	K00879	0	0	0	0	0	0	0	0	0	0	0	0	0	0	0	0	0	0	0	0	0	0	0	0	1	0	0	0	0	0	0	0	0	0	0	0	0	0	0	0	0	0	0	1	0	0	0	0
lyxK; L-xylulokinase [EC:2.7.1.53]	K00880	0	0	0	0	0	0	0	0	0	0	0	0	0	0	0	0	0	0	0	0	0	1	0	0	0	0	0	0	0	0	0	0	0	0	0	1	0	0	0	0	0	0	0	0	0	0	1	0
fruK; 1-phosphofructokinase [EC:2.7.1.56]	K00882	0	1	0	0	0	1	0	0	0	0	0	0	0	0	0	0	0	0	0	0	0	0	0	0	1	0	0	0	0	0	0	0	0	0	0	1	1	0	1	0	0	0	0	0	0	0	1	0
dgoK; 2-dehydro-3-deoxygalactonokinase [EC:2.7.1.58]	K00883	0	0	0	0	0	0	0	0	0	0	0	0	0	0	0	0	0	0	1	0	0	0	0	0	0	0	0	0	0	0	0	0	0	0	0	0	0	0	0	0	0	0	0	0	0	0	0	0
NAGK, nagK; N-acetylglucosamine kinase [EC:2.7.1.59]	K00884	0	0	0	0	0	0	0	0	0	0	0	0	0	0	0	0	0	0	0	0	0	0	0	1	0	0	0	0	0	0	0	0	0	0	0	0	0	0	0	0	0	0	0	0	1	0	0	0
nanK; N-acylmannosamine kinase [EC:2.7.1.60]	K00885	0	0	0	0	0	0	0	0	0	0	0	0	0	0	0	0	0	0	0	0	0	0	0	0	0	0	0	0	0	0	0	0	0	0	0	0	0	0	0	0	0	0	0	0	0	0	0	0
ppgK; polyphosphate glucokinase [EC:2.7.1.63]	K00886	0	0	1	0	1	1	0	0	0	0	0	0	0	0	0	0	0	0	0	0	0	0	0	0	0	0	0	0	0	0	0	0	0	0	0	0	0	0	1	0	0	0	0	0	0	0	0	0
dgkA; undecaprenol kinase [EC:2.7.1.66]	K00887	0	0	1	0	0	0	0	0	1	0	0	0	0	0	0	0	0	0	0	0	0	0	0	0	0	0	1	0	0	0	0	0	0	0	0	0	0	0	0	0	0	0	0	0	0	1	0	0
PIP5K; 1-phosphatidylinositol-4-phosphate 5-kinase [EC:2.7.1.68]	K00889	0	0	0	0	0	0	0	0	0	0	0	0	0	0	0	0	0	0	0	0	0	0	0	0	0	0	0	0	0	0	0	0	0	0	0	0	0	0	0	0	0	0	0	0	0	0	0	0
E2.7.1.71, aroK, aroL; shikimate kinase [EC:2.7.1.71]	K00891	1	1	1	0	1	1	1	1	1	0	0	0	1	2	0	1	0	0	1	0	0	0	0	1	1	0	1	0	1	1	1	1	1	1	0	0	1	2	1	1	1	2	1	2	0	1	0	0
gsk; inosine kinase [EC:2.7.1.73]	K00892	0	0	0	0	0	0	0	0	0	0	0	0	0	0	0	0	0	0	0	0	0	0	0	0	0	0	0	0	0	0	0	0	0	0	0	0	0	0	0	0	0	0	0	0	0	0	0	0
DCK; deoxycitidine kinase [EC:2.7.1.74]	K00893	0	0	0	0	0	0	0	0	0	0	0	0	0	0	0	0	0	0	0	0	0	0	0	0	0	0	0	0	1	0	0	0	0	0	0	0	0	0	0	0	0	0	0	0	0	0	0	0
pfp, PFP; diphosphate-dependent phosphofructokinase [EC:2.7.1.90]	K00895	0	0	0	0	0	0	0	0	0	0	0	1	0	1	0	0	0	0	2	0	2	0	0	0	1	0	0	0	0	1	0	0	0	0	0	0	1	0	0	0	0	0	0	1	0	0	1	0
aphA; kanamycin kinase [EC:2.7.1.95]	K00897	0	0	0	0	0	0	0	0	0	0	0	0	0	0	0	0	0	0	0	0	0	0	0	0	0	0	0	0	0	0	0	0	0	0	0	0	0	0	0	0	0	0	0	1	0	0	0	0
PDK2_3_4; pyruvate dehydrogenase kinase 2/3/4 [EC:2.7.11.2]	K00898	0	0	0	0	0	0	0	0	0	0	0	0	0	0	0	0	0	0	0	0	0	0	0	0	0	0	0	0	0	0	0	0	0	0	0	0	0	0	0	0	0	0	0	0	0	0	0	0
mtnK; 5-methylthioribose kinase [EC:2.7.1.100]	K00899	1	0	0	0	0	0	0	0	1	0	0	0	0	0	0	0	0	0	0	0	0	0	0	0	0	0	0	0	0	0	0	0	0	0	0	0	0	0	0	0	0	0	0	0	0	0	0	0
dgkA, DGK; diacylglycerol kinase (ATP) [EC:2.7.1.107]	K00901	3	0	1	0	1	1	0	0	1	0	0	0	1	0	0	1	0	0	0	0	0	1	0	0	0	0	2	0	0	0	0	0	0	0	0	1	0	0	0	0	0	1	0	0	0	0	1	0
epsB; protein-tyrosine kinase [EC:2.7.10.2]	K00903	0	0	0	0	0	0	0	0	0	0	0	0	0	0	0	0	0	0	0	0	0	0	0	0	0	0	0	0	0	0	0	0	0	0	0	0	0	0	0	0	0	0	0	0	0	0	0	0
DGUOK; deoxyguanosine kinase [EC:2.7.1.113]	K00904	0	0	0	0	0	0	0	0	0	0	0	0	0	0	0	0	0	0	0	0	0	0	0	0	0	0	0	0	0	0	0	0	0	0	0	0	0	0	0	0	0	0	0	0	0	0	0	0
aceK; isocitrate dehydrogenase kinase/phosphatase [EC:2.7.11.5 3.1.3.-]	K00906	0	0	0	0	0	0	0	0	0	2	0	1	0	0	0	0	0	0	0	0	0	0	0	0	0	0	0	0	0	0	0	0	0	0	0	0	0	0	0	0	0	0	0	0	0	0	0	0
lpxK; tetraacyldisaccharide 4'-kinase [EC:2.7.1.130]	K00912	5	1	1	0	1	1	1	1	1	2	0	0	0	0	1	1	0	0	0	1	1	1	1	2	0	1	0	1	0	1	1	1	1	0	0	0	0	0	0	0	0	2	0	1	1	1	1	0
lacC; tagatose 6-phosphate kinase [EC:2.7.1.144]	K00917	0	0	0	0	0	0	0	0	0	0	0	0	0	0	0	0	0	0	0	1	0	1	1	1	0	1	0	0	0	0	0	0	0	0	0	0	1	0	0	0	0	0	0	0	0	0	0	0
pfkC; ADP-dependent phosphofructokinase/glucokinase [EC:2.7.1.146 2.7.1.147]	K00918	0	0	0	0	0	0	0	0	0	0	0	0	0	0	0	0	0	0	0	0	0	0	0	0	0	0	0	0	0	0	0	0	0	0	0	0	1	0	0	0	0	0	0	0	0	0	0	0
ispE; 4-diphosphocytidyl-2-C-methyl-D-erythritol kinase [EC:2.7.1.148]	K00919	0	1	1	0	2	1	1	0	1	0	0	0	1	1	0	1	0	0	0	0	2	1	1	1	0	0	1	1	1	1	0	1	1	1	0	1	1	1	1	1	1	2	1	0	1	1	1	1
E2.7.1.-; kinase [EC:2.7.1.-]	K00924	1	1	6	3	27	0	1	0	23	3	2	0	0	0	0	0	0	0	0	0	0	18	24	6	0	4	19	0	0	1	0	1	0	0	1	8	1	0	0	4	0	1	0	0	0	0	17	0
ackA; acetate kinase [EC:2.7.2.1]	K00925	2	0	1	0	1	0	1	0	4	1	0	0	1	0	1	0	0	2	0	2	0	1	2	0	0	1	3	1	1	1	0	0	0	0	0	0	2	2	0	0	0	0	0	1	0	1	2	0
arcC; carbamate kinase [EC:2.7.2.2]	K00926	0	0	0	0	0	0	1	1	0	1	0	0	0	0	0	1	0	1	0	0	0	0	0	0	0	0	0	1	0	1	0	1	0	0	1	0	1	0	0	1	0	1	1	1	0	0	0	0
PGK, pgk; phosphoglycerate kinase [EC:2.7.2.3]	K00927	4	0	1	1	2	1	1	1	2	1	0	1	1	1	0	1	1	0	1	1	1	0	0	1	1	1	2	1	1	0	1	1	0	1	1	0	2	1	1	1	1	1	1	0	1	1	1	1
lysC; aspartate kinase [EC:2.7.2.4]	K00928	6	0	2	1	1	1	1	0	1	3	0	1	1	1	1	1	0	0	0	3	1	1	0	2	0	2	1	0	0	1	3	1	1	1	0	1	1	2	1	2	1	2	1	1	1	1	1	1
buk; butyrate kinase [EC:2.7.2.7]	K00929	0	0	0	0	0	0	0	0	0	0	0	0	0	0	0	0	0	0	0	0	0	0	0	0	0	0	0	0	1	1	0	1	0	0	0	0	1	2	0	0	0	2	0	0	0	0	0	0
argB; acetylglutamate kinase [EC:2.7.2.8]	K00930	3	0	1	1	1	1	1	0	1	1	0	1	1	2	0	1	0	0	0	1	1	1	1	1	0	0	1	0	0	0	1	0	0	1	1	1	1	0	1	1	1	1	1	3	1	1	1	0
proB; glutamate 5-kinase [EC:2.7.2.11]	K00931	0	0	1	1	1	1	1	1	1	1	0	0	1	1	1	1	0	0	1	1	1	0	1	1	0	1	2	0	1	0	1	0	1	1	0	1	1	2	1	1	1	0	3	1	1	1	1	0
E2.7.3.2; creatine kinase [EC:2.7.3.2]	K00933	0	0	0	0	0	0	0	0	0	1	0	0	0	0	0	0	0	0	0	0	0	0	0	0	0	0	0	0	0	0	0	0	0	0	0	0	0	0	0	0	0	0	0	0	0	0	0	0
E2.7.3.3; arginine kinase [EC:2.7.3.3]	K00934	0	0	0	0	0	0	0	0	0	1	0	0	0	0	0	0	0	0	0	0	0	0	0	0	0	0	0	0	0	0	0	0	0	0	0	0	0	0	0	0	0	0	0	0	0	0	0	0
pdtaS; two-component system, sensor histidine kinase PdtaS [EC:2.7.13.3]	K00936	10	1	0	0	0	0	8	11	2	7	0	2	5	4	3	7	1	6	0	0	0	2	1	7	3	1	1	1	4	6	4	2	6	5	3	0	0	5	0	2	2	20	0	0	1	2	3	0
ppk; polyphosphate kinase [EC:2.7.4.1]	K00937	3	1	1	1	1	3	0	1	1	0	1	0	0	0	0	0	1	0	0	0	0	1	2	1	1	0	0	0	0	0	0	1	0	0	0	0	0	0	1	2	0	1	0	0	0	0	0	0
E2.7.4.2, mvaK2; phosphomevalonate kinase [EC:2.7.4.2]	K00938	0	0	0	1	0	0	0	0	0	0	0	0	0	0	0	0	0	0	0	0	0	0	0	0	0	0	0	0	0	0	0	0	0	0	0	0	0	0	0	0	0	0	0	0	0	0	1	0
adk, AK; adenylate kinase [EC:2.7.4.3]	K00939	3	2	1	2	2	2	2	1	3	0	1	0	1	2	0	2	3	0	1	0	1	4	2	1	0	0	0	1	1	1	1	1	1	2	0	1	1	0	3	1	1	1	1	1	1	2	2	0
ndk, NME; nucleoside-diphosphate kinase [EC:2.7.4.6]	K00940	2	0	1	1	1	1	1	1	1	0	0	0	1	1	1	0	0	0	1	1	1	0	0	2	0	0	1	1	1	1	1	1	1	1	1	2	0	1	1	1	1	1	0	1	1	1	0	0
thiD; hydroxymethylpyrimidine/phosphomethylpyrimidine kinase [EC:2.7.1.49 2.7.4.7]	K00941	0	0	0	1	0	0	2	2	0	1	0	0	2	1	0	1	0	1	0	1	1	0	0	0	0	0	0	1	0	0	1	0	2	0	0	0	0	1	0	0	0	1	1	1	0	0	0	0
E2.7.4.8, gmk; guanylate kinase [EC:2.7.4.8]	K00942	4	1	1	1	1	1	1	1	1	1	0	0	1	0	1	1	0	0	1	0	0	1	1	0	1	1	2	1	1	1	1	1	1	1	0	1	0	1	1	1	1	1	1	0	0	0	1	1
tmk, DTYMK; dTMP kinase [EC:2.7.4.9]	K00943	0	1	1	1	1	2	1	0	1	0	0	0	1	1	1	0	0	1	0	1	1	1	1	1	1	0	1	1	1	1	1	0	1	1	1	1	1	1	1	0	0	0	2	1	1	1	1	1
cmk; CMP/dCMP kinase [EC:2.7.4.25]	K00945	3	0	2	1	1	1	1	1	1	2	0	0	0	1	0	1	0	0	1	1	1	2	1	1	1	1	5	0	0	1	1	0	2	0	0	1	3	1	0	1	1	0	1	1	1	1	1	0
thiL; thiamine-monophosphate kinase [EC:2.7.4.16]	K00946	5	1	1	1	2	1	1	1	1	1	2	0	1	0	1	1	1	0	0	1	0	1	2	1	1	0	1	2	0	0	0	1	1	1	0	0	1	2	0	1	1	1	0	0	1	1	1	1
PRPS, prsA; ribose-phosphate pyrophosphokinase [EC:2.7.6.1]	K00948	0	0	1	2	1	1	1	1	1	2	0	0	1	1	0	2	2	0	1	1	0	1	2	1	1	1	3	1	0	1	2	1	2	1	1	0	1	1	1	2	0	1	1	1	1	1	1	0
thiN, TPK1, THI80; thiamine pyrophosphokinase [EC:2.7.6.2]	K00949	3	0	0	0	0	0	0	0	0	0	0	0	0	0	0	0	0	0	0	0	1	0	0	0	0	0	0	0	0	1	0	0	0	0	1	0	1	0	0	0	0	0	1	0	0	0	0	0
folK; 2-amino-4-hydroxy-6-hydroxymethyldihydropteridine diphosphokinase [EC:2.7.6.3]	K00950	0	0	0	1	1	0	1	1	0	1	0	0	1	1	1	1	0	2	0	1	1	0	0	0	1	0	1	1	0	0	1	1	0	0	1	0	0	1	0	0	0	0	0	1	1	1	0	0
relA; GTP pyrophosphokinase [EC:2.7.6.5]	K00951	4	0	0	1	0	0	1	0	0	1	0	1	0	1	0	2	0	2	1	0	1	0	0	0	0	0	1	1	1	1	1	2	1	1	2	0	1	2	1	3	1	2	1	3	0	0	0	0
nadM; nicotinamide-nucleotide adenylyltransferase [EC:2.7.7.1]	K00952	0	0	0	0	0	0	0	0	0	0	0	0	0	1	0	1	0	0	0	0	0	0	0	0	0	0	0	0	0	0	0	0	0	0	0	0	0	0	0	0	0	0	0	0	0	0	0	0
FLAD1; FAD synthetase [EC:2.7.7.2]	K00953	0	0	0	0	0	0	0	0	0	0	0	0	0	0	0	0	0	0	0	0	0	0	0	0	0	0	0	0	0	0	0	0	0	0	0	0	0	0	0	0	0	0	0	0	0	0	0	0
E2.7.7.3A, coaD, kdtB; pantetheine-phosphate adenylyltransferase [EC:2.7.7.3]	K00954	2	1	1	1	1	2	1	1	1	1	0	1	0	0	1	1	0	0	0	1	0	1	2	1	1	1	1	1	1	1	1	1	1	1	1	0	1	0	1	1	0	1	0	1	1	1	1	1
cysN; sulfate adenylyltransferase subunit 1 [EC:2.7.7.4]	K00956	2	1	0	1	0	2	0	0	0	2	0	0	0	0	0	0	0	0	0	0	0	0	0	0	0	0	0	0	0	0	0	1	0	0	0	0	0	0	0	0	0	1	0	0	0	0	0	0
sat, met3; sulfate adenylyltransferase [EC:2.7.7.4]	K00958	0	0	0	0	0	0	0	0	1	0	0	1	1	1	0	2	0	1	2	0	1	2	1	0	1	0	1	1	0	1	1	0	1	1	0	0	0	0	0	0	0	0	0	1	2	0	0	0
E2.7.7.6; DNA-directed RNA polymerase [EC:2.7.7.6]	K00960	0	0	0	0	0	0	0	0	0	0	0	0	0	0	0	0	0	0	0	0	0	0	0	0	0	0	0	0	0	0	0	0	0	0	0	0	0	0	0	0	0	0	0	0	0	0	0	0
pnp, PNPT1; polyribonucleotide nucleotidyltransferase [EC:2.7.7.8]	K00962	1	0	2	1	1	1	1	1	1	1	0	2	1	1	1	1	0	0	1	0	1	2	1	1	1	1	1	1	1	1	1	1	1	2	1	2	2	1	1	1	1	2	1	1	1	2	2	0
UGP2, galU, galF; UTP--glucose-1-phosphate uridylyltransferase [EC:2.7.7.9]	K00963	0	1	1	1	0	1	1	0	1	1	0	1	0	1	0	1	2	0	2	0	1	2	1	1	0	1	1	1	0	0	0	0	0	0	0	0	1	0	1	2	0	0	0	2	0	0	2	0
galT, GALT; UDPglucose--hexose-1-phosphate uridylyltransferase [EC:2.7.7.12]	K00965	3	0	0	1	1	1	1	0	1	0	0	0	0	0	0	1	0	0	0	0	0	1	1	1	0	0	0	0	0	0	0	0	0	1	1	0	1	0	0	2	0	0	0	0	0	0	1	1
GMPP; mannose-1-phosphate guanylyltransferase [EC:2.7.7.13]	K00966	0	0	0	1	0	0	1	0	0	1	0	0	1	0	1	2	0	0	0	1	0	0	0	0	0	0	0	0	0	0	1	0	1	1	0	0	1	0	1	0	0	0	0	1	0	0	0	1
PCYT2; ethanolamine-phosphate cytidylyltransferase [EC:2.7.7.14]	K00967	0	0	0	0	0	0	0	0	0	0	0	0	0	0	0	0	0	0	0	0	0	0	0	0	0	0	0	0	0	0	1	0	0	0	0	0	0	0	0	0	0	0	0	0	0	0	0	0
PCYT1; choline-phosphate cytidylyltransferase [EC:2.7.7.15]	K00968	0	0	0	0	0	0	0	0	0	0	0	0	0	0	0	0	0	0	0	0	0	0	0	0	0	0	0	0	0	1	1	0	0	0	0	0	0	0	0	1	0	0	0	0	0	0	0	0
nadD; nicotinate-nucleotide adenylyltransferase [EC:2.7.7.18]	K00969	4	1	1	1	1	1	1	1	1	1	2	0	0	1	1	1	0	1	0	1	1	1	1	0	1	0	1	1	1	1	1	1	1	1	0	0	1	1	1	1	1	1	1	0	1	1	0	1
pcnB; poly(A) polymerase [EC:2.7.7.19]	K00970	0	0	1	0	0	0	1	0	1	0	0	0	0	1	1	3	0	0	1	1	1	1	1	1	2	1	3	0	1	0	1	1	1	1	0	0	3	1	1	1	0	1	1	1	1	1	2	0
manC, cpsB; mannose-1-phosphate guanylyltransferase [EC:2.7.7.13]	K00971	5	0	1	1	1	1	1	1	1	3	0	0	2	1	0	1	1	1	0	1	1	1	0	1	0	0	1	2	1	1	1	1	1	0	1	2	1	0	0	3	0	1	2	1	1	1	1	0
UAP1; UDP-N-acetylglucosamine/UDP-N-acetylgalactosamine diphosphorylase [EC:2.7.7.23 2.7.7.83]	K00972	0	1	1	1	1	1	0	0	0	0	0	0	0	0	1	0	1	0	0	1	1	1	1	0	0	1	3	0	0	0	1	0	2	0	0	1	0	0	0	0	0	0	1	0	1	0	1	0
E2.7.7.24, rfbA, rffH; glucose-1-phosphate thymidylyltransferase [EC:2.7.7.24]	K00973	8	0	1	1	1	1	1	2	1	0	1	0	1	1	0	1	0	2	1	1	0	2	2	4	0	1	2	1	2	2	1	1	1	2	0	1	0	1	0	0	0	1	1	2	1	4	1	0
cca; tRNA nucleotidyltransferase (CCA-adding enzyme) [EC:2.7.7.72 3.1.3.- 3.1.4.-]	K00974	6	1	0	0	1	1	2	1	1	0	1	1	1	1	2	2	0	0	2	0	1	0	0	0	0	0	0	1	0	1	2	0	2	1	2	0	1	0	0	0	1	0	0	1	0	1	1	1
glgC; glucose-1-phosphate adenylyltransferase [EC:2.7.7.27]	K00975	3	2	1	1	2	1	1	0	2	0	0	0	1	0	1	2	0	1	0	1	0	3	1	1	0	0	2	0	1	0	0	0	0	0	1	0	1	0	1	0	0	0	0	0	1	1	0	1
rfbF; glucose-1-phosphate cytidylyltransferase [EC:2.7.7.33]	K00978	2	0	0	0	2	0	1	0	0	1	1	0	0	0	0	1	0	1	0	0	0	0	0	0	0	0	1	1	0	0	0	0	0	0	1	0	1	0	0	0	0	0	0	0	0	0	2	0
kdsB; 3-deoxy-manno-octulosonate cytidylyltransferase (CMP-KDO synthetase) [EC:2.7.7.38]	K00979	4	1	1	0	1	1	1	1	0	1	1	0	0	1	0	4	0	1	1	0	1	2	1	1	1	1	0	1	0	1	2	1	1	1	0	1	0	1	0	1	0	1	1	2	0	1	2	0
tagD; glycerol-3-phosphate cytidylyltransferase [EC:2.7.7.39]	K00980	2	0	0	0	0	0	0	0	0	0	0	0	0	0	0	0	0	0	0	0	0	0	0	0	0	0	0	0	0	1	0	0	0	0	0	0	0	0	0	1	0	0	0	0	0	0	0	0
E2.7.7.41, CDS1, CDS2, cdsA; phosphatidate cytidylyltransferase [EC:2.7.7.41]	K00981	3	1	1	1	2	1	1	1	3	1	0	0	1	1	0	1	0	0	0	0	1	2	2	1	0	1	4	2	1	0	1	1	1	1	1	1	1	1	1	1	1	2	1	1	1	1	1	1
glnE; [glutamine synthetase] adenylyltransferase / [glutamine synthetase]-adenylyl-L-tyrosine phosphorylase [EC:2.7.7.42 2.7.7.89]	K00982	0	0	1	1	1	1	1	0	1	1	0	0	0	1	0	0	0	0	2	0	1	2	1	1	0	0	1	0	0	0	0	0	0	0	0	0	0	0	1	0	0	0	0	0	2	0	0	0
neuA; N-acylneuraminate cytidylyltransferase [EC:2.7.7.43]	K00983	8	1	1	0	0	1	0	0	0	0	0	0	0	0	0	0	1	0	0	0	0	0	1	2	0	0	1	2	1	0	2	0	0	1	0	0	0	0	0	1	1	2	1	7	0	0	0	0
ltrA; RNA-directed DNA polymerase [EC:2.7.7.49]	K00986	1	1	0	0	2	0	0	0	4	2	0	0	0	0	0	1	0	0	0	0	1	0	0	1	0	2	2	0	0	0	0	0	0	0	0	0	1	0	0	0	0	1	0	1	0	1	0	0
CEG1; mRNA guanylyltransferase [EC:2.7.7.50]	K00987	0	0	0	0	0	0	0	0	0	0	0	0	0	0	0	0	0	0	0	0	0	0	0	0	0	0	0	0	0	0	0	0	0	0	0	0	0	0	0	0	0	0	0	0	0	0	0	0
APA1_2; sulfate adenylyltransferase (ADP) / ATP adenylyltransferase [EC:2.7.7.5 2.7.7.53]	K00988	0	0	0	0	0	0	0	0	0	0	0	0	0	0	0	0	0	1	0	0	0	0	0	0	0	0	0	0	0	0	0	0	0	0	0	0	0	0	0	0	0	0	0	0	0	0	0	0
rph; ribonuclease PH [EC:2.7.7.56]	K00989	0	0	1	1	1	2	1	1	1	1	0	0	0	0	0	1	0	1	0	0	0	2	1	1	0	1	0	1	0	0	0	0	0	1	0	0	1	0	1	0	0	0	0	0	0	1	0	0
glnD; [protein-PII] uridylyltransferase [EC:2.7.7.59]	K00990	0	1	0	1	1	1	1	0	1	1	0	0	0	1	0	1	0	0	1	2	1	1	0	1	0	0	1	0	0	0	0	0	0	0	0	0	0	0	1	0	0	0	0	2	1	0	0	0
ispD; 2-C-methyl-D-erythritol 4-phosphate cytidylyltransferase [EC:2.7.7.60]	K00991	0	1	1	0	1	2	1	0	1	0	0	0	1	1	1	0	1	0	0	0	1	0	0	1	0	0	1	1	2	1	1	1	1	1	0	0	1	2	1	1	1	1	1	1	1	1	1	1
EPT1; ethanolaminephosphotransferase [EC:2.7.8.1]	K00993	0	0	0	0	0	0	0	0	0	0	0	0	0	0	0	0	0	0	0	0	0	0	0	0	0	0	0	0	0	0	0	0	0	0	0	0	0	0	0	0	0	0	0	0	0	0	0	0
pgsA, PGS1; CDP-diacylglycerol---glycerol-3-phosphate 3-phosphatidyltransferase [EC:2.7.8.5]	K00995	1	0	1	1	1	2	1	2	2	1	0	0	1	2	0	2	0	0	0	2	1	1	0	2	0	0	2	1	4	1	3	0	0	1	0	2	1	0	2	0	1	0	0	2	1	1	1	1
rfbP; undecaprenyl-phosphate galactose phosphotransferase [EC:2.7.8.6]	K00996	1	0	0	0	0	0	0	0	0	0	0	0	0	0	0	0	0	0	0	0	0	0	0	0	0	0	0	0	0	0	0	0	0	0	0	0	0	0	0	0	0	0	0	0	0	0	0	0
acpS; holo-[acyl-carrier protein] synthase [EC:2.7.8.7]	K00997	1	0	0	0	1	1	1	0	1	0	0	0	0	0	0	0	0	0	1	0	0	1	1	1	1	0	2	1	1	1	1	0	1	2	1	1	1	0	0	0	0	0	1	0	1	1	1	0
CDIPT; CDP-diacylglycerol--inositol 3-phosphatidyltransferase [EC:2.7.8.11]	K00999	0	0	0	0	0	0	0	0	0	0	0	0	0	0	0	0	0	0	0	0	0	0	0	0	0	0	0	0	0	0	0	0	0	0	0	0	0	0	0	0	0	0	0	0	0	0	0	0
mraY; phospho-N-acetylmuramoyl-pentapeptide-transferase [EC:2.7.8.13]	K01000	5	2	0	1	0	1	1	0	1	1	0	0	2	1	0	1	0	0	1	0	1	1	1	1	0	0	1	0	1	1	1	1	1	0	0	0	1	1	1	1	0	1	1	1	1	1	1	0
ALG7; UDP-N-acetylglucosamine--dolichyl-phosphate N-acetylglucosaminephosphotransferase [EC:2.7.8.15]	K01001	0	0	0	0	0	0	0	0	0	0	0	0	0	0	0	0	0	0	0	0	0	0	0	0	0	0	0	0	0	0	0	0	0	0	0	0	0	0	0	0	0	0	0	0	0	0	0	0
mdoB; phosphoglycerol transferase [EC:2.7.8.20]	K01002	0	0	0	0	0	0	0	0	0	0	0	0	0	0	0	0	0	0	0	0	0	0	0	0	0	0	0	0	0	0	0	0	0	0	0	0	1	0	0	0	0	0	0	0	0	0	0	0
bcpA; oxaloacetate decarboxylase [EC:4.1.1.112]	K01003	0	0	0	0	0	0	0	0	0	0	0	0	0	0	0	0	0	0	0	0	0	0	0	0	0	0	0	0	0	0	0	0	0	0	0	0	0	0	0	0	0	0	0	0	0	0	0	0
pcs; phosphatidylcholine synthase [EC:2.7.8.24]	K01004	0	0	0	0	0	0	0	0	0	0	0	0	0	0	0	0	0	0	0	0	0	0	0	0	0	0	0	0	0	0	0	0	0	0	0	0	0	0	0	0	0	0	0	0	0	0	0	0
ppdK; pyruvate, orthophosphate dikinase [EC:2.7.9.1]	K01006	0	1	1	0	1	1	1	1	2	2	0	1	0	2	1	2	0	1	3	1	2	1	0	2	0	0	1	1	1	1	2	1	1	2	1	0	1	2	1	1	0	2	1	5	0	2	2	0
pps, ppsA; pyruvate, water dikinase [EC:2.7.9.2]	K01007	3	0	0	0	0	0	0	0	0	4	0	0	1	1	5	1	0	2	0	0	4	4	0	1	1	0	0	1	0	0	1	0	6	0	1	1	0	0	0	1	1	0	0	2	0	0	2	0
selD, SEPHS; selenide, water dikinase [EC:2.7.9.3]	K01008	1	0	1	0	0	0	0	1	1	1	0	1	1	1	1	1	1	1	0	0	1	1	0	1	0	1	0	0	0	1	1	0	1	1	0	0	1	0	0	0	1	2	0	1	1	0	0	0
TST, MPST, sseA; thiosulfate/3-mercaptopyruvate sulfurtransferase [EC:2.8.1.1 2.8.1.2]	K01011	0	1	1	1	0	2	1	1	0	1	1	1	0	0	0	2	1	0	0	0	2	0	2	1	0	0	2	0	3	1	0	1	1	0	1	0	0	0	0	2	0	2	0	0	0	0	0	0
bioB; biotin synthase [EC:2.8.1.6]	K01012	3	0	1	1	1	0	1	0	1	1	0	0	0	1	1	2	0	0	0	0	2	1	1	1	0	0	3	0	0	0	0	0	2	1	0	0	2	0	0	1	0	1	2	0	1	1	4	0
SULT1A; aryl sulfotransferase [EC:2.8.2.1]	K01014	0	0	0	0	0	0	0	0	0	0	0	0	0	0	0	0	0	0	0	0	0	0	0	0	0	0	0	0	0	0	0	0	0	0	0	0	0	0	0	0	0	0	0	0	0	0	0	0
SULT1E1, STE; estrone sulfotransferase [EC:2.8.2.4]	K01016	0	0	0	0	0	0	0	0	0	0	0	0	0	0	0	0	0	0	0	0	0	0	0	0	0	0	0	0	0	0	0	0	0	0	0	0	0	0	0	0	0	0	0	0	0	0	0	0
assT; arylsulfate sulfotransferase [EC:2.8.2.22]	K01023	0	0	0	0	0	0	0	0	0	0	0	0	0	0	0	0	0	0	0	0	0	0	0	0	0	0	0	0	0	0	0	0	0	0	0	0	0	0	0	0	0	0	0	0	0	0	0	0
SULT1; sulfotransferase [EC:2.8.2.-]	K01025	0	0	0	0	0	0	0	0	0	0	0	0	0	0	0	0	0	0	0	0	0	0	0	0	0	0	0	0	0	0	0	1	0	0	0	0	0	0	0	0	0	1	0	0	0	0	0	0
pct; propionate CoA-transferase [EC:2.8.3.1]	K01026	0	0	1	0	1	0	0	0	1	0	0	0	0	0	0	0	1	0	0	2	0	0	1	0	0	2	1	0	0	0	0	0	0	0	0	0	2	0	0	0	0	0	0	0	0	0	0	0
OXCT; 3-oxoacid CoA-transferase [EC:2.8.3.5]	K01027	0	0	0	0	0	0	0	0	0	0	0	0	0	0	0	0	0	0	0	0	0	0	0	0	0	0	0	0	0	0	0	0	0	1	0	0	0	0	0	0	0	0	0	0	0	0	0	0
E2.8.3.5A, scoA; 3-oxoacid CoA-transferase subunit A [EC:2.8.3.5]	K01028	6	0	0	1	0	0	0	0	0	0	0	0	0	0	0	0	0	0	0	0	0	0	0	0	0	0	0	0	0	0	3	0	0	1	0	0	0	0	0	0	0	0	0	0	0	0	0	0
E2.8.3.5B, scoB; 3-oxoacid CoA-transferase subunit B [EC:2.8.3.5]	K01029	7	0	0	1	0	0	0	0	0	0	0	0	0	0	0	0	0	0	2	0	0	0	0	0	0	0	0	0	0	0	1	0	0	3	0	0	0	0	0	0	2	0	0	0	0	0	0	0
pcaI; 3-oxoadipate CoA-transferase, alpha subunit [EC:2.8.3.6]	K01031	0	0	0	0	0	0	0	0	0	0	0	0	0	0	0	0	0	0	0	0	0	0	0	0	0	0	0	0	0	0	0	0	0	3	0	0	0	0	0	0	1	0	0	0	0	0	0	1
pcaJ; 3-oxoadipate CoA-transferase, beta subunit [EC:2.8.3.6]	K01032	0	0	0	0	0	0	0	0	0	0	0	0	0	0	0	0	0	0	0	0	0	0	0	0	0	0	0	0	0	0	0	0	0	0	0	0	0	0	0	0	0	0	0	0	0	0	0	0
atoD; acetate CoA/acetoacetate CoA-transferase alpha subunit [EC:2.8.3.8 2.8.3.9]	K01034	0	0	0	0	0	0	0	0	0	0	0	0	0	0	0	0	0	0	2	1	0	0	0	0	0	0	0	0	0	0	0	0	0	0	0	0	0	0	0	0	0	0	0	0	0	0	0	0
atoA; acetate CoA/acetoacetate CoA-transferase beta subunit [EC:2.8.3.8 2.8.3.9]	K01035	0	0	0	0	0	0	0	0	0	0	0	0	0	0	0	0	0	0	0	1	0	0	0	0	0	0	0	0	0	0	2	0	0	1	0	0	0	0	0	0	0	0	0	0	0	0	0	1
gctA; glutaconate CoA-transferase, subunit A [EC:2.8.3.12]	K01039	0	0	0	1	0	0	0	0	0	0	0	0	0	0	0	0	0	0	3	0	0	0	0	0	0	0	0	0	0	0	3	0	2	2	0	0	1	0	0	0	2	0	1	0	0	1	0	0
gctB; glutaconate CoA-transferase, subunit B [EC:2.8.3.12]	K01040	0	0	0	0	0	0	0	0	0	0	0	0	0	0	0	0	0	0	2	0	0	0	0	0	0	0	0	0	0	0	4	0	1	2	0	0	1	0	0	0	1	0	1	0	0	1	0	0
selA; L-seryl-tRNA(Ser) seleniumtransferase [EC:2.9.1.1]	K01042	0	0	1	0	0	0	0	1	4	1	0	1	0	1	1	1	0	1	0	0	1	1	1	2	0	2	0	0	0	1	1	0	1	1	0	0	0	1	0	0	0	1	1	1	1	0	1	0
PON; arylesterase / paraoxonase [EC:3.1.1.2 3.1.8.1]	K01045	0	0	0	0	0	0	0	0	0	0	0	0	0	0	0	0	0	0	0	0	0	0	0	0	0	0	0	0	0	0	1	0	0	0	0	0	0	0	0	0	0	0	0	0	0	0	0	0
lip, TGL2; triacylglycerol lipase [EC:3.1.1.3]	K01046	0	0	1	0	2	0	0	1	1	0	0	0	2	0	0	0	0	0	0	0	0	1	0	1	0	0	0	0	0	1	0	0	0	0	0	0	0	0	0	0	0	0	0	0	0	0	0	0
pldB; lysophospholipase [EC:3.1.1.5]	K01048	0	0	0	1	0	0	0	0	2	0	0	0	0	1	0	0	0	0	1	0	0	0	0	0	0	0	0	0	0	0	0	0	0	0	0	0	0	0	0	0	0	0	0	1	0	0	0	0
E3.1.1.11; pectinesterase [EC:3.1.1.11]	K01051	10	2	0	0	0	0	0	0	1	0	0	0	0	0	0	0	0	0	0	0	0	0	0	1	0	0	0	0	0	0	0	0	0	0	0	0	0	0	0	5	0	0	0	0	0	0	0	0
E3.1.1.17, gnl, RGN; gluconolactonase [EC:3.1.1.17]	K01053	0	0	4	0	2	0	0	0	5	0	0	0	0	0	1	0	1	1	0	2	0	3	1	1	0	0	3	1	0	0	3	0	0	0	0	2	2	0	0	1	0	0	0	0	0	0	2	1
MGLL; acylglycerol lipase [EC:3.1.1.23]	K01054	0	0	0	0	0	0	0	0	0	0	0	0	0	0	0	0	0	0	0	0	0	0	1	0	0	0	1	0	1	0	0	0	0	0	0	0	0	0	0	0	0	0	0	0	0	0	0	0
pcaD; 3-oxoadipate enol-lactonase [EC:3.1.1.24]	K01055	0	0	0	1	0	0	0	0	0	1	0	1	0	0	2	0	0	0	1	0	0	1	0	0	0	0	0	0	0	0	1	0	2	0	0	0	0	0	0	0	0	0	0	0	0	0	0	0
PTH1, pth, spoVC; peptidyl-tRNA hydrolase, PTH1 family [EC:3.1.1.29]	K01056	3	0	1	1	1	0	1	1	1	1	0	1	1	1	0	1	1	0	1	1	1	1	1	0	0	0	1	1	0	1	1	1	1	1	1	0	2	1	1	1	1	1	1	1	0	1	1	1
PGLS, pgl, devB; 6-phosphogluconolactonase [EC:3.1.1.31]	K01057	0	0	1	0	1	0	1	0	0	1	0	1	1	1	0	0	0	0	0	0	0	1	0	0	0	0	0	0	0	0	1	0	1	0	0	1	1	0	1	0	0	0	0	0	0	0	1	0
pldA; phospholipase A1/A2 [EC:3.1.1.32 3.1.1.4]	K01058	2	0	0	0	0	0	0	0	0	0	0	0	0	0	0	0	0	0	0	0	0	0	0	0	0	0	0	0	0	0	0	0	0	0	0	0	0	0	0	0	0	0	0	0	0	0	0	0
cah; cephalosporin-C deacetylase [EC:3.1.1.41]	K01060	0	1	0	0	0	2	0	0	0	0	0	0	0	0	0	0	1	0	0	2	0	0	0	1	1	0	0	0	0	0	0	0	0	0	0	0	2	0	0	0	0	0	0	0	0	0	0	0
E3.1.1.45; carboxymethylenebutenolidase [EC:3.1.1.45]	K01061	0	1	0	0	0	0	1	2	0	0	0	0	2	0	0	0	0	0	0	0	0	0	0	1	0	0	0	1	0	0	2	0	0	0	0	0	0	0	0	1	0	0	0	0	0	0	1	0
aes; acetyl esterase [EC:3.1.1.-]	K01066	0	0	0	1	0	0	0	0	1	1	0	0	0	0	0	0	0	0	0	0	0	1	1	0	1	0	1	0	0	0	0	0	1	0	0	0	1	0	0	0	0	0	0	0	0	0	0	0
E3.1.2.1, ACH1; acetyl-CoA hydrolase [EC:3.1.2.1]	K01067	0	0	0	0	0	0	0	0	0	0	0	0	0	0	0	0	0	0	0	0	0	0	0	0	0	0	0	0	1	0	0	0	0	0	0	0	0	0	0	0	0	0	0	0	0	0	0	0
gloB, gloC, HAGH; hydroxyacylglutathione hydrolase [EC:3.1.2.6]	K01069	0	0	0	1	0	0	0	1	0	1	0	0	0	1	1	0	0	0	0	0	0	0	0	0	0	0	1	0	0	0	1	0	0	0	0	1	0	0	0	0	3	0	1	1	0	0	1	0
frmB, ESD, fghA; S-formylglutathione hydrolase [EC:3.1.2.12]	K01070	0	0	0	0	0	0	0	0	1	0	0	0	0	0	0	0	0	0	0	0	0	0	0	0	0	0	0	0	0	0	1	0	0	0	0	0	0	0	0	0	0	0	0	0	0	0	0	0
MCH; medium-chain acyl-[acyl-carrier-protein] hydrolase [EC:3.1.2.21]	K01071	0	0	0	0	0	0	0	0	0	0	0	0	0	0	0	0	0	0	0	0	0	0	0	0	0	0	0	0	0	0	0	0	0	0	0	0	0	0	0	0	0	0	0	0	0	0	0	0
E3.1.2.20; acyl-CoA hydrolase [EC:3.1.2.20]	K01073	0	0	0	0	0	0	0	0	0	0	0	0	0	0	0	0	0	0	0	0	0	0	0	0	0	0	0	0	0	0	0	0	0	0	0	0	0	0	0	0	0	0	0	0	0	0	0	0
PPT; palmitoyl-protein thioesterase [EC:3.1.2.22]	K01074	0	0	0	0	0	0	0	0	0	0	0	0	0	0	0	0	0	0	0	0	0	0	0	0	0	0	0	0	0	0	0	0	0	0	0	0	0	0	0	0	0	0	0	0	0	0	0	0
E3.1.2.23; 4-hydroxybenzoyl-CoA thioesterase [EC:3.1.2.23]	K01075	0	0	1	0	1	0	0	0	1	2	0	0	0	0	0	0	0	0	0	0	0	0	0	0	0	0	0	0	0	0	0	0	0	1	0	0	0	0	0	0	0	0	0	0	0	0	1	0
E3.1.3.1, phoA, phoB; alkaline phosphatase [EC:3.1.3.1]	K01077	2	2	0	1	2	0	0	0	3	0	0	0	0	0	0	0	0	0	0	0	0	1	1	0	0	0	1	0	0	0	1	1	0	0	0	1	1	1	0	1	0	1	0	1	0	0	1	0
PHO; acid phosphatase [EC:3.1.3.2]	K01078	0	1	0	1	0	1	0	0	0	0	0	0	0	0	0	0	0	0	0	0	0	0	0	0	0	0	0	0	0	0	0	0	0	0	0	0	0	0	0	0	0	0	0	0	0	0	0	0
serB, PSPH; phosphoserine phosphatase [EC:3.1.3.3]	K01079	1	0	0	0	0	1	1	0	0	0	0	1	0	0	0	0	1	0	1	0	0	0	0	1	0	0	1	0	0	0	0	0	2	0	1	0	1	0	1	0	0	0	0	0	0	0	0	0
E3.1.3.5; 5'-nucleotidase [EC:3.1.3.5]	K01081	3	0	0	0	0	0	0	0	0	4	0	0	0	0	0	0	0	3	0	0	0	0	0	0	0	0	0	2	0	0	0	1	0	0	0	0	2	1	0	2	0	0	1	0	0	0	0	0
cysQ, MET22, BPNT1; 3'(2'), 5'-bisphosphate nucleotidase [EC:3.1.3.7]	K01082	0	0	1	1	0	1	0	0	3	0	0	1	1	0	0	0	0	1	0	0	0	1	0	0	0	0	0	0	0	0	1	1	0	0	0	0	0	0	1	1	0	1	0	0	0	0	0	0
E3.1.3.8; 3-phytase [EC:3.1.3.8]	K01083	0	1	0	1	0	1	0	0	0	0	0	0	0	0	0	0	0	0	0	0	0	0	0	0	0	0	0	0	0	0	0	0	0	0	0	1	0	0	0	0	0	1	0	0	0	0	1	0
fbp-SEBP; fructose-1,6-bisphosphatase I / sedoheptulose-1,7-bisphosphatase [EC:3.1.3.11 3.1.3.37]	K01086	0	0	0	0	0	0	0	0	0	0	0	0	0	0	0	0	0	0	0	0	0	0	0	0	0	0	0	0	0	0	0	0	0	0	0	0	0	0	0	0	0	0	0	0	0	0	0	0
otsB; trehalose 6-phosphate phosphatase [EC:3.1.3.12]	K01087	0	0	0	0	0	0	0	0	0	0	0	0	0	0	0	0	0	1	0	0	0	0	0	0	0	0	0	0	0	0	0	0	0	0	0	0	0	0	0	0	1	0	0	0	0	0	0	2
hisB; imidazoleglycerol-phosphate dehydratase / histidinol-phosphatase [EC:4.2.1.19 3.1.3.15]	K01089	3	0	0	1	0	0	0	0	0	0	0	0	0	0	0	0	0	0	0	0	0	0	0	0	0	0	0	0	1	0	0	0	0	0	0	0	1	1	0	1	0	0	0	0	0	0	0	0
E3.1.3.16; protein phosphatase [EC:3.1.3.16]	K01090	0	0	2	3	2	2	0	3	5	3	0	0	0	3	0	2	1	3	0	2	1	2	1	0	0	0	1	0	0	0	3	0	0	0	1	2	0	0	1	0	0	0	0	0	1	0	1	0
gph; phosphoglycolate phosphatase [EC:3.1.3.18]	K01091	1	2	2	1	1	1	1	0	2	2	1	0	1	0	1	1	0	0	0	0	0	1	0	1	0	0	1	0	1	2	0	1	0	0	0	0	4	0	0	1	0	2	0	0	0	1	3	0
E3.1.3.25, IMPA, suhB; myo-inositol-1(or 4)-monophosphatase [EC:3.1.3.25]	K01092	0	0	1	0	2	2	2	2	3	4	1	2	1	0	1	1	0	0	1	0	0	2	1	0	1	0	4	1	2	1	2	0	1	1	2	1	2	0	1	2	3	1	1	1	1	1	3	1
appA; 4-phytase / acid phosphatase [EC:3.1.3.26 3.1.3.2]	K01093	0	0	0	0	0	0	0	0	0	0	0	0	0	0	0	0	0	0	0	0	0	0	0	0	0	0	0	0	0	0	0	0	0	0	0	0	0	0	0	0	0	0	0	0	0	0	0	0
GEP4; phosphatidylglycerophosphatase GEP4 [EC:3.1.3.27]	K01094	0	0	0	0	0	1	0	0	0	0	0	0	0	0	0	0	0	0	0	0	0	0	0	0	0	0	0	0	0	0	0	0	0	0	0	0	0	0	0	0	0	0	0	0	0	0	0	0
pgpA; phosphatidylglycerophosphatase A [EC:3.1.3.27]	K01095	0	0	0	0	0	1	0	0	1	0	0	0	0	0	0	1	0	0	0	0	1	0	0	0	0	0	0	1	1	1	1	0	1	0	0	0	0	0	0	0	0	0	1	1	1	1	1	0
NANP; N-acylneuraminate-9-phosphatase [EC:3.1.3.29]	K01097	0	0	0	0	0	0	0	0	0	0	0	0	0	0	0	0	0	0	0	0	0	0	0	0	0	0	0	0	0	0	0	0	0	0	0	0	0	0	0	0	0	0	0	0	0	0	0	0
E3.1.3.41; 4-nitrophenyl phosphatase [EC:3.1.3.41]	K01101	0	0	0	0	0	0	0	0	0	0	0	0	0	0	1	0	0	0	0	0	0	0	0	0	0	1	0	0	0	0	0	0	0	0	0	0	0	0	0	0	0	0	0	0	0	0	1	0
E3.1.3.48; protein-tyrosine phosphatase [EC:3.1.3.48]	K01104	3	0	0	2	1	1	1	1	1	1	0	1	1	1	1	0	0	1	1	0	0	1	0	1	0	0	2	0	1	1	3	1	2	1	1	0	3	0	2	1	1	1	0	1	1	0	1	1
E3.1.3.56; inositol-1,4,5-trisphosphate 5-phosphatase [EC:3.1.3.56]	K01106	0	0	0	0	0	0	0	0	0	0	0	0	0	0	0	0	0	0	0	0	0	0	0	0	0	0	0	0	0	0	0	0	0	0	0	0	0	0	0	0	0	0	0	0	0	0	0	0
PTEN; phosphatidylinositol-3,4,5-trisphosphate 3-phosphatase and dual-specificity protein phosphatase PTEN [EC:3.1.3.16 3.1.3.48 3.1.3.67]	K01110	0	0	0	0	0	0	0	0	0	0	0	0	0	0	0	0	0	0	0	0	0	0	0	0	0	0	0	0	0	0	0	0	0	0	0	0	0	0	0	0	0	0	0	0	0	0	0	0
phoD; alkaline phosphatase D [EC:3.1.3.1]	K01113	1	2	0	5	0	1	0	1	3	0	0	0	0	0	0	0	0	1	0	1	0	4	1	0	0	0	2	0	1	1	0	1	0	0	0	1	0	1	0	0	0	0	0	0	0	0	3	0
plc; phospholipase C [EC:3.1.4.3]	K01114	0	0	0	0	0	0	0	0	0	1	0	0	0	0	0	1	0	0	0	0	0	0	0	0	0	0	0	0	0	0	0	0	0	0	0	0	0	0	0	0	0	0	0	0	0	0	0	0
E3.1.4.12; sphingomyelin phosphodiesterase [EC:3.1.4.12]	K01117	0	0	0	0	0	0	0	0	0	0	0	0	0	0	0	0	0	0	0	0	0	0	0	0	0	0	0	0	0	0	0	0	0	0	0	0	0	0	0	0	0	0	0	0	0	0	0	0
acpD, azoR; FMN-dependent NADH-azoreductase [EC:1.7.1.17]	K01118	0	0	0	0	0	0	0	0	0	0	0	0	0	1	0	0	0	0	0	0	0	0	0	0	0	0	0	0	0	0	0	0	0	0	0	1	0	0	0	0	0	0	0	0	0	0	0	0
cpdB; 2',3'-cyclic-nucleotide 2'-phosphodiesterase / 3'-nucleotidase [EC:3.1.4.16 3.1.3.6]	K01119	0	0	0	0	0	0	0	0	0	1	0	0	0	0	0	0	0	0	0	0	0	0	0	0	0	0	0	1	0	0	0	0	0	0	0	0	2	0	0	0	0	1	0	0	0	0	0	0
cpdP; 3',5'-cyclic-nucleotide phosphodiesterase [EC:3.1.4.17]	K01120	0	0	0	1	0	0	0	0	0	0	0	0	0	0	0	0	0	0	0	0	0	0	0	0	0	0	0	0	0	0	0	0	0	0	0	0	0	0	0	0	0	0	0	0	0	0	0	0
ENPP2; ectonucleotide pyrophosphatase/phosphodiesterase family member 2 [EC:3.1.4.39]	K01122	0	0	0	0	0	0	0	0	0	0	0	0	0	0	0	0	0	0	0	0	0	0	0	0	0	0	0	0	0	0	0	0	0	0	0	0	0	0	0	0	0	0	0	0	0	0	0	0
E3.1.4.46, glpQ, ugpQ; glycerophosphoryl diester phosphodiesterase [EC:3.1.4.46]	K01126	5	1	2	0	1	2	0	3	5	4	1	1	0	2	1	0	0	3	1	6	0	1	6	2	0	2	1	0	1	1	0	0	1	1	1	1	4	2	0	1	0	0	0	1	1	0	1	0
E3.1.4.50; glycosylphosphatidylinositol phospholipase D [EC:3.1.4.50]	K01127	0	0	0	0	0	0	0	0	0	1	0	0	0	0	0	0	0	3	0	0	0	0	0	0	0	0	0	0	0	0	0	0	0	0	0	0	0	0	0	0	0	0	0	0	0	0	0	0
dgt; dGTPase [EC:3.1.5.1]	K01129	4	1	1	1	1	1	1	0	0	0	0	1	0	2	1	2	0	0	0	3	1	1	0	1	0	0	0	1	1	2	0	0	0	1	0	1	1	0	1	1	1	0	0	1	0	1	1	1
E3.1.6.1, aslA; arylsulfatase [EC:3.1.6.1]	K01130	1	6	4	0	13	0	0	2	8	2	3	0	2	4	0	0	1	1	0	3	0	21	17	2	4	5	17	1	0	0	6	1	1	0	0	9	1	1	0	5	0	2	0	1	0	0	10	0
STS; steryl-sulfatase [EC:3.1.6.2]	K01131	0	0	0	0	0	0	0	0	0	0	0	0	0	0	0	0	0	0	0	0	0	0	0	0	0	0	0	0	0	0	0	0	0	0	0	0	0	0	0	0	0	0	0	0	0	0	1	0
GALNS; N-acetylgalactosamine-6-sulfatase [EC:3.1.6.4]	K01132	0	3	0	0	0	0	0	0	1	0	0	0	0	0	0	0	0	0	0	0	0	1	4	0	0	1	2	0	0	0	0	0	0	0	0	3	0	0	0	0	0	0	0	0	0	0	1	0
betC; choline-sulfatase [EC:3.1.6.6]	K01133	0	2	0	0	1	3	0	0	2	0	11	0	0	0	0	0	0	0	1	4	0	5	7	9	10	13	10	0	0	0	6	0	0	0	0	5	3	0	0	0	0	0	0	2	0	0	5	1
ARSA; arylsulfatase A [EC:3.1.6.8]	K01134	1	9	1	0	7	0	0	0	5	0	1	0	0	0	0	0	0	0	0	2	0	4	7	1	0	2	11	0	0	0	0	0	0	0	0	5	0	0	0	1	0	1	0	0	0	0	7	0
ARSB; arylsulfatase B [EC:3.1.6.12]	K01135	0	2	0	0	0	0	0	0	2	0	0	0	0	0	0	0	0	0	0	0	0	4	2	1	0	1	3	0	0	0	0	0	0	0	0	0	0	0	0	0	0	0	0	0	0	0	2	0
IDS; iduronate 2-sulfatase [EC:3.1.6.13]	K01136	0	4	1	0	3	1	0	0	5	0	4	0	0	0	0	0	0	0	0	1	0	0	2	1	0	1	2	0	0	0	0	0	0	0	0	2	0	0	0	1	0	0	0	0	0	0	8	0
GNS; N-acetylglucosamine-6-sulfatase [EC:3.1.6.14]	K01137	0	2	0	0	1	0	0	1	3	0	1	0	0	0	0	0	0	0	0	0	0	6	5	0	0	4	1	0	0	0	0	0	0	0	0	5	0	0	0	0	0	0	0	0	0	0	4	0
K01138; uncharacterized sulfatase [EC:3.1.6.-]	K01138	2	14	4	0	6	3	0	0	11	1	1	0	0	0	0	0	0	0	0	1	0	15	19	5	2	9	21	0	1	0	0	0	0	0	0	8	3	0	0	1	0	1	0	2	2	0	17	0
spoT; GTP diphosphokinase / guanosine-3',5'-bis(diphosphate) 3'-diphosphatase [EC:2.7.6.5 3.1.7.2]	K01139	0	0	0	1	0	0	0	0	0	0	0	0	0	0	0	0	0	1	0	0	0	0	0	0	0	0	0	0	0	0	0	0	0	0	0	0	0	0	0	0	0	0	0	0	0	0	0	0
sbcB, exoI; exodeoxyribonuclease I [EC:3.1.11.1]	K01141	0	0	0	0	0	0	0	0	0	0	0	0	0	0	0	0	0	0	0	0	0	0	0	0	0	0	0	0	0	0	0	0	0	0	0	0	1	0	0	0	0	0	0	1	0	0	0	0
E3.1.11.2, xthA; exodeoxyribonuclease III [EC:3.1.11.2]	K01142	3	0	0	0	0	1	1	0	1	1	0	0	1	0	2	1	0	1	0	0	0	0	0	0	0	0	0	0	2	1	1	1	1	1	0	1	0	0	2	1	0	1	0	0	0	1	1	0
E3.1.11.5; exodeoxyribonuclease V [EC:3.1.11.5]	K01144	0	0	0	0	0	0	0	0	0	0	0	0	2	0	0	1	0	0	0	0	0	0	0	0	0	0	0	0	0	0	0	1	0	0	0	0	0	0	0	1	0	2	0	0	0	0	0	0
xni; protein Xni	K01146	0	0	0	0	0	0	0	0	0	0	0	0	0	0	0	0	0	0	0	0	0	0	0	0	0	0	0	0	0	0	0	0	0	0	0	0	0	0	0	0	0	0	0	0	0	0	0	0
rnb; exoribonuclease II [EC:3.1.13.1]	K01147	0	0	0	0	0	2	0	0	0	0	0	1	1	1	0	1	0	0	1	0	1	0	0	0	0	0	0	0	0	0	2	0	1	0	0	0	0	0	0	0	0	0	0	1	0	0	0	0
endA; deoxyribonuclease I [EC:3.1.21.1]	K01150	0	0	0	0	0	0	2	0	0	0	0	0	0	0	0	0	0	0	0	0	0	0	0	0	0	0	0	0	0	0	0	0	0	0	0	0	1	0	0	0	0	0	1	0	0	0	0	0
nfo; deoxyribonuclease IV [EC:3.1.21.2]	K01151	0	0	1	1	2	0	0	1	0	1	0	0	0	3	0	1	0	1	1	0	1	0	1	1	0	0	1	1	0	0	0	0	0	1	0	0	1	0	0	0	0	1	1	2	0	1	0	1
hsdR; type I restriction enzyme, R subunit [EC:3.1.21.3]	K01153	15	12	1	0	11	0	0	2	8	2	0	3	2	5	0	4	0	0	2	1	0	1	3	12	2	2	4	0	0	0	4	1	1	0	0	0	5	6	0	1	2	10	4	2	2	0	7	0
hsdS; type I restriction enzyme, S subunit [EC:3.1.21.3]	K01154	11	3	1	0	5	0	0	2	5	5	0	2	0	4	0	4	0	0	2	1	0	0	2	9	0	4	3	0	1	0	1	2	0	0	0	2	3	4	0	1	1	4	1	1	0	1	2	0
E3.1.21.4; type II restriction enzyme [EC:3.1.21.4]	K01155	2	0	0	0	0	0	0	0	0	1	0	0	0	0	0	0	0	0	0	0	0	0	0	3	0	0	0	0	0	0	1	0	0	0	0	1	1	0	0	1	0	1	0	0	0	0	0	0
res; type III restriction enzyme [EC:3.1.21.5]	K01156	1	0	1	0	2	0	1	0	1	0	0	0	0	2	0	2	0	0	2	0	0	0	1	2	0	0	1	1	0	0	2	0	0	1	0	1	2	0	0	1	0	4	2	1	0	3	1	0
DNASE2; deoxyribonuclease II [EC:3.1.22.1]	K01158	0	0	0	0	0	0	0	0	0	0	0	0	0	0	0	0	0	0	0	0	0	0	0	0	0	0	0	0	0	0	0	0	0	0	0	0	0	0	0	0	0	0	0	0	0	0	0	0
ruvC; crossover junction endodeoxyribonuclease RuvC [EC:3.1.22.4]	K01159	5	1	1	1	0	1	1	1	1	1	1	0	2	0	0	1	0	0	1	0	1	1	1	0	0	1	1	1	1	0	1	1	1	1	0	0	1	1	1	1	1	1	0	0	1	2	1	1
rusA; crossover junction endodeoxyribonuclease RusA [EC:3.1.22.4]	K01160	0	0	0	0	0	0	0	0	0	0	0	0	0	0	0	0	0	0	0	0	0	0	0	0	0	0	0	0	0	0	0	0	0	0	0	0	0	0	0	0	0	0	0	0	0	0	0	0
E3.1.25.1; deoxyribonuclease (pyrimidine dimer) [EC:3.1.25.1]	K01161	0	0	0	0	0	0	0	0	0	0	0	0	0	0	0	0	0	0	0	0	0	0	0	0	0	0	0	0	0	0	0	0	0	0	0	0	0	0	0	0	0	0	0	0	0	0	0	0
K01163; uncharacterized protein	K01163	0	0	0	0	0	0	0	0	0	0	0	2	0	2	0	1	0	0	4	0	0	0	0	0	0	0	0	0	0	0	0	0	1	0	0	0	1	0	0	0	0	0	0	1	0	0	0	0
E3.1.27.1; ribonuclease T2 [EC:3.1.27.1]	K01166	0	0	0	0	0	0	0	0	0	0	0	0	0	0	0	0	0	0	0	0	0	0	0	0	0	0	0	0	0	0	0	0	0	0	0	0	0	0	0	0	0	0	0	0	0	0	0	0
E3.1.27.3; ribonuclease T1 [EC:3.1.27.3]	K01167	0	0	0	0	0	0	0	0	0	0	0	0	0	0	0	0	0	0	0	0	0	0	0	0	0	0	0	0	0	0	0	0	0	0	0	0	0	0	0	0	0	0	0	0	0	0	0	0
endA; tRNA-intron endonuclease, archaea type [EC:4.6.1.16]	K01170	0	0	0	0	0	0	0	0	0	0	0	0	0	0	0	0	0	0	0	0	0	0	0	0	0	0	0	0	0	0	1	0	0	0	0	0	0	0	0	0	0	0	0	0	0	0	0	0
ENDOG; endonuclease G, mitochondrial	K01173	1	0	0	0	0	0	0	0	0	0	0	0	0	0	0	1	0	0	0	0	0	0	1	0	0	1	0	0	0	0	0	0	0	0	0	1	0	0	0	0	0	0	1	0	0	0	1	0
nuc; micrococcal nuclease [EC:3.1.31.1]	K01174	2	0	0	0	0	0	0	0	1	0	0	0	0	0	1	0	0	0	0	1	0	0	1	3	0	1	0	1	0	0	1	0	0	1	0	0	0	0	0	2	0	0	0	0	0	3	0	0
ybfF; esterase [EC:3.1.-.-]	K01175	0	0	0	0	0	0	0	0	0	0	0	0	0	0	0	0	0	0	0	0	0	0	0	0	0	0	0	0	0	0	0	0	0	0	0	0	0	0	0	0	0	0	0	0	0	0	0	0
AMY, amyA, malS; alpha-amylase [EC:3.2.1.1]	K01176	2	0	0	0	0	0	0	1	0	0	0	0	0	1	0	0	0	0	1	0	0	0	0	0	0	0	0	0	0	0	0	0	0	0	0	0	0	0	0	0	0	0	0	0	0	0	1	0
E3.2.1.2; beta-amylase [EC:3.2.1.2]	K01177	0	0	0	0	0	0	0	0	0	0	0	0	0	0	0	0	0	0	0	0	0	0	0	0	0	0	0	0	0	0	0	0	0	0	0	0	0	0	0	0	0	0	0	0	0	0	0	0
SGA1; glucoamylase [EC:3.2.1.3]	K01178	0	0	0	0	0	0	0	0	0	0	0	0	0	0	0	0	0	0	0	0	0	0	0	0	0	0	0	0	0	0	0	0	0	0	0	0	0	0	0	0	0	0	0	0	0	0	0	0
E3.2.1.4; endoglucanase [EC:3.2.1.4]	K01179	0	1	2	1	0	3	0	2	2	0	2	0	0	0	0	0	0	1	0	0	0	2	3	3	0	1	3	0	2	0	1	0	0	0	1	4	1	1	0	7	0	0	0	1	0	0	4	0
E3.2.1.8, xynA; endo-1,4-beta-xylanase [EC:3.2.1.8]	K01181	3	2	0	0	1	2	0	0	1	0	0	0	0	0	0	0	0	0	0	1	0	0	0	0	0	0	1	0	0	0	0	0	0	0	0	1	0	0	0	4	0	1	0	0	1	0	2	0
IMA, malL; oligo-1,6-glucosidase [EC:3.2.1.10]	K01182	0	0	0	0	0	0	0	0	0	0	0	0	0	0	0	0	0	0	0	0	0	0	0	0	0	0	0	0	0	0	0	0	0	0	0	0	1	0	0	0	0	0	0	0	0	0	0	0
E3.2.1.14; chitinase [EC:3.2.1.14]	K01183	1	0	2	0	0	0	0	0	0	1	0	0	0	0	0	0	0	1	0	0	0	0	0	0	0	0	0	0	0	0	0	0	1	0	0	0	0	0	0	0	0	1	0	0	0	0	1	0
E3.2.1.17; lysozyme [EC:3.2.1.17]	K01185	0	0	0	0	0	0	0	0	0	0	0	0	1	0	0	0	0	0	0	0	0	0	0	0	0	0	0	0	0	0	0	0	0	0	0	0	0	0	0	0	0	0	0	0	0	0	0	0
NEU1; sialidase-1 [EC:3.2.1.18]	K01186	0	5	0	0	3	1	0	0	2	0	1	0	0	0	0	0	0	0	0	3	0	5	10	9	1	5	9	0	0	0	0	0	0	0	0	2	0	0	0	0	0	0	0	0	0	0	2	0
malZ; alpha-glucosidase [EC:3.2.1.20]	K01187	12	0	1	0	0	2	0	0	0	0	0	0	0	0	0	0	0	0	0	0	0	2	0	0	1	0	2	0	1	3	0	1	0	1	1	0	3	2	2	5	0	3	0	0	0	0	3	0
E3.2.1.21; beta-glucosidase [EC:3.2.1.21]	K01188	0	0	0	0	0	1	0	0	0	0	0	0	0	0	0	0	0	0	0	0	0	0	0	0	0	0	0	0	0	0	0	0	0	0	0	0	0	0	0	0	0	0	0	0	0	0	0	0
lacZ; beta-galactosidase [EC:3.2.1.23]	K01190	6	1	0	0	0	1	0	0	0	0	2	0	0	0	0	0	1	0	0	2	0	4	0	4	0	3	1	0	0	0	1	1	0	0	0	8	3	2	0	13	0	3	0	1	0	0	14	0
MAN2C1; alpha-mannosidase [EC:3.2.1.24]	K01191	0	1	0	0	0	2	0	0	1	1	0	0	1	0	0	0	0	0	0	4	0	1	2	2	5	3	4	1	0	0	0	0	0	1	0	1	4	0	0	0	0	1	0	1	1	0	0	0
E3.2.1.25, MANBA, manB; beta-mannosidase [EC:3.2.1.25]	K01192	0	0	0	0	0	2	0	0	0	0	2	0	0	0	0	0	0	1	0	1	0	0	0	3	4	1	1	0	0	0	0	1	0	0	0	1	2	0	0	0	0	1	0	1	2	0	1	1
INV, sacA; beta-fructofuranosidase [EC:3.2.1.26]	K01193	0	0	0	0	0	0	0	0	0	0	1	0	1	0	0	0	1	0	0	0	0	6	2	1	0	1	2	0	0	1	0	0	0	0	0	1	0	0	0	0	0	0	0	0	0	0	1	0
TREH, treA, treF; alpha,alpha-trehalase [EC:3.2.1.28]	K01194	0	0	0	0	0	1	0	0	0	0	0	0	0	0	0	0	0	0	0	0	0	0	0	0	0	0	0	0	0	0	0	0	0	0	0	0	0	0	0	0	0	0	0	0	0	2	0	0
uidA, GUSB; beta-glucuronidase [EC:3.2.1.31]	K01195	0	0	0	0	0	0	0	0	0	0	0	0	0	0	0	0	0	1	0	0	0	1	0	0	1	0	0	0	1	0	1	0	0	0	0	0	0	0	0	0	0	0	0	0	0	1	0	0
hya; hyaluronoglucosaminidase [EC:3.2.1.35]	K01197	0	0	0	0	0	0	0	0	0	1	0	0	0	0	0	0	0	0	0	0	0	0	0	0	0	0	0	0	0	0	0	0	0	0	0	0	0	0	0	0	0	0	0	0	0	0	0	0
xynB; xylan 1,4-beta-xylosidase [EC:3.2.1.37]	K01198	0	2	0	0	0	0	0	0	0	0	0	0	0	0	0	0	1	0	1	0	0	0	0	0	0	0	0	0	0	0	0	0	0	0	0	1	0	0	0	1	0	0	0	0	0	0	1	0
pulA; pullulanase [EC:3.2.1.41]	K01200	0	0	0	0	0	0	0	0	0	0	0	0	0	0	0	0	0	0	0	0	0	0	0	0	0	0	0	0	1	0	0	0	0	0	0	0	0	0	0	2	0	0	0	0	0	0	0	0
GBA, srfJ; glucosylceramidase [EC:3.2.1.45]	K01201	8	0	0	0	0	0	0	0	0	0	0	0	0	0	0	0	0	0	0	0	0	0	0	0	1	0	0	0	2	0	0	0	0	0	0	0	0	0	0	0	0	1	0	0	0	0	0	0
NAGLU; alpha-N-acetylglucosaminidase [EC:3.2.1.50]	K01205	0	0	0	0	0	0	0	0	0	0	1	0	0	0	0	0	0	0	0	1	0	1	1	0	0	0	2	0	0	0	0	0	0	0	0	0	0	0	0	0	0	0	0	0	0	0	1	0
FUCA; alpha-L-fucosidase [EC:3.2.1.51]	K01206	2	2	0	0	0	1	0	0	0	1	3	0	0	0	0	1	0	0	0	6	0	5	5	5	3	4	0	1	0	0	3	4	0	0	0	7	2	1	0	6	0	5	0	2	0	0	22	0
nagZ; beta-N-acetylhexosaminidase [EC:3.2.1.52]	K01207	0	0	0	1	0	0	1	1	0	2	0	1	0	0	1	1	0	0	1	2	1	0	1	0	0	0	1	1	1	1	1	0	1	0	1	0	0	0	0	0	0	0	0	0	2	0	0	0
cd, ma, nplT; cyclomaltodextrinase / maltogenic alpha-amylase / neopullulanase [EC:3.2.1.54 3.2.1.133 3.2.1.135]	K01208	0	0	0	0	0	0	0	0	0	0	0	0	0	0	0	0	0	0	0	0	0	0	0	0	0	0	0	0	0	0	0	0	0	0	0	0	0	0	0	0	0	0	0	0	0	0	0	0
abfA; alpha-N-arabinofuranosidase [EC:3.2.1.55]	K01209	8	0	0	0	0	1	0	0	0	1	1	0	0	0	0	0	1	0	0	2	0	4	1	1	0	1	3	1	0	0	1	0	0	0	0	5	1	1	0	7	0	0	0	1	1	0	8	0
E3.2.1.58; glucan 1,3-beta-glucosidase [EC:3.2.1.58]	K01210	0	0	0	0	0	0	0	0	0	0	0	0	0	0	0	0	0	0	0	0	0	0	0	0	0	0	0	0	0	0	0	0	0	0	0	0	0	0	0	0	0	0	0	0	0	0	0	0
sacC, levB; levanase [EC:3.2.1.65]	K01212	0	0	0	0	0	0	0	0	0	0	0	0	0	0	0	0	0	0	0	1	0	2	0	0	0	0	0	0	0	0	0	0	0	0	0	1	0	0	0	1	0	0	0	0	0	0	1	0
ISA, treX; isoamylase [EC:3.2.1.68]	K01214	0	0	0	0	0	0	0	0	0	0	0	0	0	0	0	0	0	0	0	0	0	0	0	0	0	0	0	0	0	0	0	0	0	0	0	0	0	0	0	0	0	0	0	0	0	0	0	0
IDUA; L-iduronidase [EC:3.2.1.76]	K01217	0	0	0	0	0	0	0	0	0	0	0	0	0	0	0	0	0	0	0	0	0	0	0	0	0	0	0	0	0	0	0	0	0	0	0	0	0	0	0	0	0	0	0	0	0	0	0	0
gmuG; mannan endo-1,4-beta-mannosidase [EC:3.2.1.78]	K01218	0	0	0	0	0	0	0	0	0	0	0	0	0	0	0	0	2	0	0	0	0	0	0	0	0	0	0	0	0	0	0	0	0	0	0	0	0	0	0	5	0	0	0	0	0	0	1	0
E3.2.1.81; beta-agarase [EC:3.2.1.81]	K01219	0	0	0	0	0	0	0	0	0	0	0	0	0	0	0	0	0	0	0	0	0	0	0	0	0	0	0	0	0	0	0	0	0	0	0	0	0	0	0	0	0	0	0	0	0	0	0	0
E3.2.1.85, lacG; 6-phospho-beta-galactosidase [EC:3.2.1.85]	K01220	0	0	0	0	0	0	0	0	0	0	0	0	0	0	0	0	0	0	0	0	0	0	0	0	0	0	0	0	0	0	0	0	0	0	0	0	0	0	0	0	0	0	0	0	0	0	0	0
E3.2.1.86A, celF; 6-phospho-beta-glucosidase [EC:3.2.1.86]	K01222	0	0	0	0	0	0	0	0	0	0	0	0	0	0	0	0	0	0	0	3	0	0	0	1	0	0	0	0	0	0	0	0	0	0	0	0	1	0	0	0	0	0	0	0	0	0	0	0
E3.2.1.89; arabinogalactan endo-1,4-beta-galactosidase [EC:3.2.1.89]	K01224	3	0	0	0	0	0	0	0	0	0	0	0	0	0	0	0	0	0	0	0	0	0	0	0	0	0	1	0	0	0	0	0	0	0	0	1	0	0	0	2	0	2	0	0	0	0	0	0
treC; trehalose-6-phosphate hydrolase [EC:3.2.1.93]	K01226	2	0	0	0	0	0	0	0	0	0	0	0	0	0	0	0	0	0	0	0	0	0	0	0	0	0	0	0	0	0	0	0	0	0	0	0	0	0	0	0	0	0	0	0	0	0	0	0
E3.2.1.96; mannosyl-glycoprotein endo-beta-N-acetylglucosaminidase [EC:3.2.1.96]	K01227	0	0	0	0	0	0	0	0	0	0	0	0	0	0	0	0	0	0	0	0	0	0	0	0	0	0	0	0	0	0	0	0	0	0	0	0	0	0	0	0	0	0	0	0	0	0	0	0
csn; chitosanase [EC:3.2.1.132]	K01233	0	0	0	0	0	0	0	0	0	0	0	0	0	0	0	0	0	0	0	0	0	0	0	0	1	0	0	0	0	0	0	0	0	0	0	0	0	0	0	0	0	0	0	0	0	0	0	0
aguA; alpha-glucuronidase [EC:3.2.1.139]	K01235	1	0	0	0	0	0	0	0	0	0	0	0	0	0	0	0	0	0	0	0	0	0	0	0	0	0	0	0	0	0	0	0	0	0	0	1	0	0	0	1	0	0	0	0	0	0	1	0
treZ, glgZ; maltooligosyltrehalose trehalohydrolase [EC:3.2.1.141]	K01236	0	0	0	0	0	0	0	0	0	0	0	0	0	0	0	0	0	0	0	0	0	0	0	0	0	0	0	0	0	0	0	0	0	0	0	0	0	0	0	0	0	0	0	0	0	0	0	0
iunH; purine nucleosidase [EC:3.2.2.1]	K01239	0	0	0	0	1	0	0	0	1	0	0	0	0	0	0	0	0	0	0	0	0	1	2	1	1	0	2	0	0	0	2	0	0	0	0	1	2	0	1	0	0	0	0	1	2	0	0	0
URH1; uridine nucleosidase [EC:3.2.2.3]	K01240	0	0	0	0	0	0	0	0	0	0	0	0	0	0	0	0	0	0	0	0	0	0	0	0	0	0	0	0	0	0	0	0	0	0	0	0	1	0	0	0	0	0	0	0	0	0	0	0
amn; AMP nucleosidase [EC:3.2.2.4]	K01241	0	1	0	0	0	1	0	0	0	0	0	0	0	0	0	1	0	0	0	0	0	0	1	0	0	0	0	0	1	1	0	1	0	1	0	0	0	1	0	1	0	1	0	0	1	0	0	0
mtnN, mtn, pfs; adenosylhomocysteine nucleosidase [EC:3.2.2.9]	K01243	0	0	0	0	0	0	1	0	1	0	0	0	0	0	0	0	0	0	0	0	0	1	0	0	0	0	1	0	0	0	0	0	0	0	0	0	1	0	0	0	1	0	0	0	1	0	0	1
MTN; 5'-methylthioadenosine nucleosidase [EC:3.2.2.16]	K01244	0	0	0	0	0	0	0	0	0	0	0	0	0	0	0	0	0	0	0	0	0	0	0	0	0	0	0	0	0	0	0	0	0	0	0	0	0	0	0	0	0	0	0	0	0	0	0	0
tag; DNA-3-methyladenine glycosylase I [EC:3.2.2.20]	K01246	3	0	0	0	0	1	1	1	1	0	0	0	1	2	0	1	0	0	1	0	1	0	0	0	0	0	0	0	1	0	1	0	1	0	0	1	1	0	0	1	0	0	1	1	1	1	1	0
alkA; DNA-3-methyladenine glycosylase II [EC:3.2.2.21]	K01247	2	0	2	0	1	0	1	1	1	0	0	0	0	0	0	0	0	0	1	0	0	0	0	0	0	0	0	0	1	1	0	0	1	0	0	0	0	0	2	0	0	0	0	1	0	0	0	0
rihA; pyrimidine-specific ribonucleoside hydrolase [EC:3.2.-.-]	K01250	1	0	0	0	0	0	0	0	0	0	0	0	0	0	0	0	0	0	0	0	0	0	0	1	0	0	0	1	0	0	0	0	0	0	0	0	3	1	0	0	0	1	0	0	1	0	0	0
E3.3.1.1, ahcY; adenosylhomocysteinase [EC:3.3.1.1]	K01251	3	1	1	2	1	1	1	2	2	1	0	0	2	1	0	1	1	1	0	0	1	0	0	0	0	0	1	1	1	1	2	1	1	1	1	2	0	1	1	0	1	1	2	1	0	2	1	0
EPHX1; microsomal epoxide hydrolase [EC:3.3.2.9]	K01253	0	0	0	0	0	0	0	0	0	0	0	0	0	0	0	0	0	0	0	0	0	0	0	0	0	0	0	0	0	0	1	0	0	0	0	0	0	0	0	0	0	0	1	2	0	0	0	0
CARP, pepA; leucyl aminopeptidase [EC:3.4.11.1]	K01255	5	0	0	1	1	0	1	0	1	0	0	0	1	1	0	1	0	0	1	0	1	0	0	0	0	0	0	0	1	1	0	1	0	1	0	1	0	1	1	1	1	1	0	0	1	0	0	1
pepN; aminopeptidase N [EC:3.4.11.2]	K01256	4	0	0	0	0	2	0	2	1	3	0	0	1	0	0	1	0	0	0	0	0	0	0	0	0	0	2	0	1	0	0	1	0	0	0	0	0	2	1	0	0	2	0	0	0	0	1	0
pepT; tripeptide aminopeptidase [EC:3.4.11.4]	K01258	3	0	3	1	0	0	0	0	2	0	0	1	0	0	0	1	1	1	0	0	0	1	1	0	0	0	3	0	0	0	3	0	0	0	0	0	1	0	0	0	0	0	1	0	0	0	1	0
pip; proline iminopeptidase [EC:3.4.11.5]	K01259	3	0	0	0	0	0	0	2	0	0	0	0	0	0	0	0	0	0	0	0	0	0	0	0	0	0	0	0	0	1	1	0	1	0	0	0	0	0	0	0	0	3	0	0	0	0	1	0
pepP; Xaa-Pro aminopeptidase [EC:3.4.11.9]	K01262	4	6	2	1	2	2	1	3	2	2	0	0	0	0	0	1	0	1	1	1	1	0	1	3	1	0	2	3	2	1	1	2	2	1	1	3	1	1	0	3	1	0	1	0	2	1	2	1
E3.4.11.14; cytosol alanyl aminopeptidase [EC:3.4.11.14]	K01263	0	0	0	0	0	0	0	0	0	0	0	0	0	0	0	0	0	0	0	0	0	0	0	0	0	0	0	0	0	0	0	0	0	0	0	0	0	0	0	0	0	0	0	0	0	0	0	0
APE3; aminopeptidase Y [EC:3.4.11.15]	K01264	0	0	0	0	0	0	0	0	0	0	0	0	0	0	0	0	0	0	0	0	0	0	0	0	0	0	0	0	0	0	0	0	0	0	0	0	0	0	0	0	0	0	0	0	0	0	0	0
map; methionyl aminopeptidase [EC:3.4.11.18]	K01265	4	0	1	0	1	1	1	1	1	1	1	0	1	0	1	1	1	0	0	1	1	1	1	0	1	0	0	1	0	1	0	1	1	2	0	0	1	2	2	3	1	1	1	1	1	1	2	1
dmpA, dap; D-aminopeptidase [EC:3.4.11.19]	K01266	0	0	0	0	0	0	0	1	0	0	0	0	0	0	0	0	0	0	1	0	0	0	1	0	0	0	0	1	0	1	0	0	0	0	0	0	0	1	0	0	0	0	0	0	0	0	0	0
DNPEP; aspartyl aminopeptidase [EC:3.4.11.21]	K01267	0	0	0	0	0	0	0	0	0	1	0	0	0	0	0	0	0	0	0	0	0	0	0	0	0	0	0	0	1	0	0	0	0	0	0	0	0	0	0	0	1	0	0	0	0	0	0	0
E3.4.11.-; aminopeptidase [EC:3.4.11.-]	K01269	0	0	0	0	0	0	0	0	0	0	0	0	0	0	0	0	0	0	0	0	0	0	0	0	0	0	0	0	0	0	0	0	0	0	0	0	0	0	0	0	0	0	0	0	0	0	0	0
pepD; dipeptidase D [EC:3.4.13.-]	K01270	3	0	0	0	1	0	0	0	0	0	0	0	0	0	0	0	0	0	0	0	0	0	0	0	0	0	0	1	0	0	0	3	0	0	0	0	1	2	0	2	0	2	0	0	0	0	1	0
pepQ; Xaa-Pro dipeptidase [EC:3.4.13.9]	K01271	0	0	0	0	0	0	0	1	0	0	0	0	0	0	0	0	0	0	1	1	0	0	0	0	0	1	2	1	0	0	0	0	0	0	1	0	2	0	1	0	0	0	1	5	2	0	0	0
DPEP; membrane dipeptidase [EC:3.4.13.19]	K01273	0	3	2	1	2	0	0	10	4	1	2	1	0	0	1	0	0	0	0	0	0	0	2	1	0	4	3	1	1	0	1	1	0	0	0	2	0	1	1	2	0	1	0	0	1	0	0	0
E3.4.13.-; D-alanyl-D-alanine dipeptidase [EC:3.4.13.-]	K01274	0	0	0	0	0	0	0	0	0	0	0	0	0	0	0	0	0	0	0	0	0	0	0	0	0	0	0	0	0	0	0	0	0	0	0	0	0	0	0	0	0	0	0	0	0	0	0	0
DPP3; dipeptidyl-peptidase III [EC:3.4.14.4]	K01277	2	0	0	0	0	0	0	0	0	0	0	0	0	0	0	0	0	0	0	0	0	0	0	0	0	0	0	0	0	0	0	1	0	0	0	0	0	0	0	0	0	1	0	0	0	0	0	0
DPP4, CD26; dipeptidyl-peptidase 4 [EC:3.4.14.5]	K01278	4	2	1	0	4	0	0	3	2	0	0	0	0	0	0	0	0	0	0	0	0	4	1	0	0	0	1	3	0	1	0	2	0	0	0	1	0	1	1	2	0	4	0	0	0	0	3	0
TPP2; tripeptidyl-peptidase II [EC:3.4.14.10]	K01280	0	0	0	0	0	0	0	0	2	0	0	0	0	0	0	0	0	0	0	0	0	0	0	0	0	0	0	0	0	0	0	0	0	0	0	0	0	0	0	0	0	0	0	0	0	0	0	0
pepX; X-Pro dipeptidyl-peptidase [EC:3.4.14.11]	K01281	0	0	0	0	1	0	0	1	0	0	0	0	0	0	0	0	0	0	0	0	0	0	0	0	0	0	0	0	0	0	0	1	0	0	0	0	0	1	0	0	0	0	0	0	0	0	1	0
ACE, CD143; peptidyl-dipeptidase A [EC:3.4.15.1]	K01283	0	1	1	0	0	0	0	2	2	1	0	0	0	0	0	0	0	1	0	0	0	0	0	0	0	0	1	0	0	0	0	0	0	0	0	1	0	0	0	0	0	0	0	0	0	0	2	0
dcp; peptidyl-dipeptidase Dcp [EC:3.4.15.5]	K01284	9	0	0	0	1	0	0	0	0	0	0	0	0	0	0	0	0	0	0	0	0	0	0	0	0	0	0	1	0	1	0	0	0	0	0	1	0	1	0	2	0	2	0	0	0	0	1	0
PRCP; lysosomal Pro-X carboxypeptidase [EC:3.4.16.2]	K01285	0	0	0	0	0	0	0	0	0	0	0	0	0	0	0	0	0	0	0	0	0	0	0	0	0	0	0	0	0	0	0	0	0	0	0	0	0	0	0	0	0	0	0	0	0	0	0	0
E3.4.16.4; D-alanyl-D-alanine carboxypeptidase [EC:3.4.16.4]	K01286	1	0	0	0	0	0	0	1	0	0	0	0	0	0	0	0	0	0	2	0	0	0	0	0	0	0	0	0	0	1	2	0	1	0	0	0	0	0	1	0	0	4	1	0	0	0	0	0
KEX1; carboxypeptidase D [EC:3.4.16.6]	K01288	0	0	0	0	0	0	0	0	0	0	0	0	0	0	0	1	0	0	0	0	0	0	0	0	0	0	0	0	0	0	0	0	0	0	0	0	0	0	0	0	0	0	0	0	0	0	0	0
cpg; glutamate carboxypeptidase [EC:3.4.17.11]	K01295	1	1	0	0	1	1	0	3	0	0	0	0	0	1	0	0	0	0	0	0	0	0	0	0	0	0	0	1	0	0	0	0	0	0	0	0	0	0	1	0	0	0	0	0	1	0	0	0
ldcA; muramoyltetrapeptide carboxypeptidase [EC:3.4.17.13]	K01297	4	0	0	0	0	0	1	0	0	1	1	0	1	0	0	1	0	1	0	0	0	0	0	0	0	0	0	0	4	2	1	1	0	0	0	0	0	0	0	1	0	1	0	1	0	0	0	0
CPA2; carboxypeptidase A2 [EC:3.4.17.15]	K01298	0	0	0	0	0	0	0	0	0	0	0	0	0	0	0	0	0	0	0	0	0	0	0	0	0	0	0	0	0	0	0	0	0	0	0	0	0	0	0	0	0	0	0	0	0	0	0	0
E3.4.17.19; carboxypeptidase Taq [EC:3.4.17.19]	K01299	0	1	2	2	1	1	2	0	1	0	0	0	1	0	0	0	0	0	0	0	0	1	1	0	0	0	0	0	1	1	0	0	0	0	0	0	1	0	0	0	0	0	0	0	0	0	0	0
NAALAD; N-acetylated-alpha-linked acidic dipeptidase [EC:3.4.17.21]	K01301	0	0	0	0	0	0	0	4	0	0	0	0	0	0	0	0	0	0	0	0	0	0	0	0	0	0	0	0	0	0	0	0	0	0	0	0	0	0	0	0	0	0	0	0	0	0	0	0
CPQ; carboxypeptidase Q [EC:3.4.17.-]	K01302	0	0	1	0	0	0	0	2	0	1	0	0	0	0	0	0	0	0	0	0	0	0	0	0	0	0	0	0	0	0	0	0	0	0	0	0	0	0	0	0	0	0	0	0	0	0	0	0
APEH; acylaminoacyl-peptidase [EC:3.4.19.1]	K01303	0	0	0	0	0	0	0	1	0	0	0	0	0	0	0	0	0	0	0	0	0	1	0	0	0	0	0	0	0	0	0	0	0	0	0	0	0	0	0	0	0	0	0	0	0	0	0	0
pcp; pyroglutamyl-peptidase [EC:3.4.19.3]	K01304	0	0	0	1	1	0	0	0	0	1	0	0	0	0	0	0	0	0	0	0	0	0	0	0	0	0	0	0	0	0	0	0	0	0	0	0	0	0	0	0	0	0	0	0	0	0	0	0
iadA; beta-aspartyl-dipeptidase (metallo-type) [EC:3.4.19.-]	K01305	0	0	0	0	0	0	0	0	0	0	0	0	0	0	0	0	0	0	0	0	0	0	0	0	0	0	0	1	0	0	0	0	0	0	0	0	0	0	0	0	0	0	0	0	0	0	0	0
GGH; gamma-glutamyl hydrolase [EC:3.4.19.9]	K01307	0	0	0	0	0	0	0	0	0	0	0	0	0	0	0	0	0	0	0	0	0	0	0	0	0	0	0	0	0	0	0	0	0	0	0	0	0	0	0	0	0	0	0	0	0	0	0	0
yqgT; g-D-glutamyl-meso-diaminopimelate peptidase [EC:3.4.19.11]	K01308	0	0	0	0	0	0	0	0	0	0	0	0	0	0	0	0	0	0	0	0	0	0	0	0	0	0	0	0	0	0	0	0	0	0	0	0	0	0	0	0	0	0	0	0	0	0	0	0
CTRB; chymotrypsin [EC:3.4.21.1]	K01310	0	0	0	0	0	0	0	0	0	0	0	0	0	0	0	0	0	0	0	0	0	0	0	0	0	0	0	0	0	0	0	0	0	0	0	0	0	0	0	0	0	0	0	0	0	0	0	0
PRSS1_2_3; trypsin [EC:3.4.21.4]	K01312	0	0	0	0	0	0	0	0	0	0	0	0	0	0	0	0	0	0	0	0	0	0	0	0	0	0	0	0	0	0	0	0	0	0	0	0	0	0	0	0	0	0	0	0	0	0	0	0
PREP; prolyl oligopeptidase [EC:3.4.21.26]	K01322	6	1	1	1	1	0	0	1	2	0	0	0	0	0	0	0	0	0	0	0	0	1	0	0	0	0	1	0	2	1	0	1	0	0	0	0	0	0	1	1	0	2	0	0	0	0	1	0
E3.4.21.50; lysyl endopeptidase [EC:3.4.21.50]	K01337	0	0	0	0	0	0	0	0	0	0	0	0	0	0	0	0	0	0	0	0	0	0	0	0	0	0	0	0	0	0	0	0	0	0	0	0	0	0	0	0	0	0	0	0	0	0	0	0
lon; ATP-dependent Lon protease [EC:3.4.21.53]	K01338	6	1	2	2	5	1	1	2	2	6	0	3	2	7	2	5	0	3	4	0	4	1	1	5	1	0	4	3	1	1	4	1	3	0	1	0	4	1	0	2	2	1	1	3	3	0	1	1
KEX2; kexin [EC:3.4.21.61]	K01341	0	0	0	0	0	0	0	0	0	0	0	0	0	0	0	0	0	0	0	0	0	0	0	0	0	0	0	0	0	0	0	0	0	0	0	0	0	0	0	0	0	0	0	0	0	0	0	0
aprE; subtilisin [EC:3.4.21.62]	K01342	0	0	0	0	0	0	0	0	0	0	0	0	0	0	0	0	0	0	0	0	0	0	0	0	0	0	0	0	0	0	0	0	0	1	0	0	0	0	0	0	0	0	0	0	0	0	1	0
iga; IgA-specific serine endopeptidase [EC:3.4.21.72]	K01347	0	0	0	0	0	0	0	0	0	0	0	0	0	0	0	0	0	0	0	0	0	1	0	0	0	0	0	0	0	0	0	0	0	0	0	0	0	0	0	0	0	0	0	0	0	0	0	0
ptrB; oligopeptidase B [EC:3.4.21.83]	K01354	6	1	0	0	0	0	0	0	0	0	0	0	0	0	0	0	0	0	0	0	0	0	0	0	0	0	0	1	0	1	0	1	0	0	0	0	0	1	0	2	0	1	0	0	0	0	0	0
lexA; repressor LexA [EC:3.4.21.88]	K01356	0	0	1	1	0	0	1	3	3	2	0	0	1	0	1	1	0	1	0	1	0	0	1	2	0	0	2	1	1	1	1	0	1	1	0	2	1	0	1	1	1	1	0	0	1	1	2	1
clpP, CLPP; ATP-dependent Clp protease, protease subunit [EC:3.4.21.92]	K01358	2	1	2	0	2	2	1	1	2	2	0	0	3	1	0	1	0	1	1	2	1	3	1	2	0	1	1	0	1	1	1	0	1	2	0	0	2	1	2	3	1	1	0	1	0	1	3	1
E3.4.21.96; lactocepin [EC:3.4.21.96]	K01361	0	0	0	0	0	0	0	0	0	0	0	0	0	0	0	0	0	0	0	0	0	0	0	0	0	0	0	0	0	0	0	0	0	0	0	0	0	0	0	0	0	0	0	0	0	0	0	0
speB; streptopain [EC:3.4.22.10]	K01364	0	0	0	0	0	0	0	0	0	0	0	0	0	0	0	0	0	0	0	0	0	0	0	0	0	0	0	0	0	0	0	0	0	0	0	0	0	0	0	0	0	0	0	0	0	0	0	0
CTSL; cathepsin L [EC:3.4.22.15]	K01365	0	0	0	0	0	0	0	0	0	0	0	0	0	0	0	0	0	0	0	0	0	0	0	0	0	0	0	0	0	0	0	0	0	0	0	0	0	0	0	0	0	0	0	0	0	0	0	0
CTSH; cathepsin H [EC:3.4.22.16]	K01366	0	0	0	0	0	0	0	0	0	0	0	0	0	0	0	0	0	0	0	0	0	0	0	0	0	0	0	0	0	0	0	0	0	0	0	0	0	0	0	0	0	0	0	0	0	0	0	0
CTSK; cathepsin K [EC:3.4.22.38]	K01371	0	0	0	0	0	0	0	0	0	0	0	0	0	0	0	0	0	0	0	0	0	0	0	0	0	0	0	0	0	0	0	0	0	0	0	0	0	0	0	0	0	0	0	0	0	0	0	0
BLMH, pepC; bleomycin hydrolase [EC:3.4.22.40]	K01372	2	0	0	0	0	0	0	0	0	0	0	0	0	0	0	0	0	0	0	0	0	2	0	0	0	0	0	0	1	1	0	3	0	0	0	0	0	1	0	3	0	3	0	0	0	0	2	0
colA; microbial collagenase [EC:3.4.24.3]	K01387	0	0	0	1	0	0	0	0	0	0	0	0	0	0	0	0	0	0	0	0	0	0	0	0	0	0	0	0	0	0	0	0	0	0	0	0	0	0	0	0	0	0	0	0	0	0	0	0
THOP1; thimet oligopeptidase [EC:3.4.24.15]	K01392	1	0	0	0	0	0	0	1	0	0	0	0	0	0	0	0	0	0	0	0	0	0	0	0	0	0	0	0	0	1	0	0	0	0	0	0	0	0	0	0	0	0	0	2	0	0	0	0
NLN; neurolysin [EC:3.4.24.16]	K01393	0	0	0	0	0	0	0	0	0	0	0	0	0	0	0	0	0	0	0	0	0	0	0	0	0	0	0	0	0	0	0	0	0	0	0	0	0	0	0	0	0	0	0	0	0	0	0	0
lasB; pseudolysin [EC:3.4.24.26]	K01399	0	0	0	0	0	0	0	0	0	0	0	0	0	0	0	0	0	0	0	0	0	0	0	0	0	0	0	0	0	0	0	0	0	0	0	0	0	0	0	0	0	0	0	0	0	0	0	0
PRD1; saccharolysin [EC:3.4.24.37]	K01405	0	0	0	0	0	0	0	1	0	0	0	0	0	0	0	0	0	0	0	0	0	0	0	0	0	0	0	0	0	0	0	0	0	0	0	0	0	0	0	0	0	0	0	0	0	0	0	0
prtC; serralysin [EC:3.4.24.40]	K01406	0	0	0	0	0	0	0	0	0	0	0	0	0	0	0	0	0	0	0	0	0	0	0	0	0	0	0	0	0	0	0	0	0	0	0	0	0	0	0	0	0	0	0	0	0	0	0	0
IDE, ide; insulysin [EC:3.4.24.56]	K01408	0	0	0	0	0	2	1	0	0	0	0	0	0	0	0	0	0	0	0	0	0	0	0	0	0	0	0	0	0	0	0	0	0	0	0	0	0	0	0	0	0	0	0	0	0	0	0	0
KAE1, tsaD, QRI7; N6-L-threonylcarbamoyladenine synthase [EC:2.3.1.234]	K01409	3	0	1	1	1	1	1	1	1	3	0	1	1	0	0	1	0	0	1	0	0	1	1	1	0	0	1	1	1	1	1	1	1	1	1	1	0	1	1	2	2	0	1	1	1	1	0	2
NRD1; nardilysin [EC:3.4.24.61]	K01411	0	0	0	0	0	0	0	0	0	0	0	0	0	0	0	0	0	0	0	0	0	0	1	0	0	0	0	0	0	0	0	0	0	0	0	0	0	0	0	0	0	0	0	0	0	0	0	0
prlC; oligopeptidase A [EC:3.4.24.70]	K01414	0	1	0	0	0	1	0	2	1	0	0	0	1	0	0	0	0	0	0	0	0	0	0	0	0	0	0	0	0	0	0	0	0	0	0	0	0	0	0	0	0	0	0	0	0	0	0	0
ECE; endothelin-converting enzyme [EC:3.4.24.71]	K01415	1	0	0	0	1	0	0	0	0	0	0	0	0	0	0	0	0	0	0	0	0	0	0	0	0	0	0	0	0	0	0	0	0	0	0	0	0	0	0	0	0	0	0	0	0	0	0	0
hslV, clpQ; ATP-dependent HslUV protease, peptidase subunit HslV [EC:3.4.25.2]	K01419	0	0	0	0	0	0	1	1	1	1	0	1	0	1	0	1	0	0	1	1	1	1	1	0	0	0	1	1	1	1	1	0	0	0	0	0	1	0	0	0	0	0	1	0	1	0	0	0
fnr; CRP/FNR family transcriptional regulator, anaerobic regulatory protein	K01420	3	0	0	1	0	1	2	1	0	2	0	2	1	1	1	1	1	0	1	3	1	1	0	0	1	0	0	0	2	1	1	5	3	2	1	1	1	1	1	6	2	7	1	2	2	0	0	3
yhgE; putative membrane protein	K01421	0	0	0	0	0	0	0	0	0	0	0	0	0	0	0	0	0	0	0	0	0	0	0	0	0	0	0	0	0	0	0	0	0	0	0	0	0	0	0	0	0	0	0	0	0	0	0	0
E3.5.1.1, ansA, ansB; L-asparaginase [EC:3.5.1.1]	K01424	7	0	1	0	1	1	1	2	0	0	0	0	1	1	0	0	0	2	0	0	0	0	0	2	0	0	0	0	1	1	0	2	0	0	0	0	1	0	0	4	0	3	0	1	0	0	1	0
glsA, GLS; glutaminase [EC:3.5.1.2]	K01425	0	0	0	0	1	0	1	0	0	0	0	0	0	0	0	0	0	0	0	0	0	0	0	0	0	0	0	0	0	0	0	0	0	0	0	0	0	0	0	0	0	0	0	0	0	1	0	0
E3.5.1.4, amiE; amidase [EC:3.5.1.4]	K01426	1	3	0	0	0	1	0	3	0	1	0	1	0	0	2	0	0	1	10	0	0	0	0	0	0	0	0	0	0	0	9	0	3	1	1	0	2	0	0	1	0	1	0	5	1	0	0	0
UPB1, pydC; beta-ureidopropionase [EC:3.5.1.6]	K01431	0	0	0	0	0	0	0	0	0	2	0	0	0	0	0	0	0	0	0	0	0	0	0	0	0	0	0	0	0	0	0	0	0	0	0	0	0	0	0	0	0	0	0	0	0	0	0	0
AFMID; arylformamidase [EC:3.5.1.9]	K01432	0	0	0	0	0	0	0	0	0	0	0	0	0	0	0	0	0	0	0	0	0	0	0	0	0	0	0	0	0	0	0	0	1	0	0	0	0	0	0	0	0	0	0	0	0	0	0	0
purU; formyltetrahydrofolate deformylase [EC:3.5.1.10]	K01433	2	0	1	0	2	1	0	0	1	0	0	0	1	0	0	0	0	0	0	0	0	0	0	0	0	0	0	0	0	0	0	0	0	0	0	0	0	0	1	1	0	0	0	0	0	1	0	0
E3.5.1.11; penicillin amidase [EC:3.5.1.11]	K01434	1	1	0	2	0	1	0	1	1	2	0	2	0	0	2	0	0	0	0	3	0	2	1	0	0	0	0	1	3	1	1	0	1	0	0	0	0	0	0	4	0	0	0	4	4	0	0	1
K01436; amidohydrolase [EC:3.5.1.-]	K01436	0	0	0	1	0	0	0	1	0	0	1	1	0	1	0	0	0	1	1	0	0	1	2	0	0	1	1	1	0	0	2	0	1	0	0	0	1	1	0	0	0	0	1	2	1	0	2	0
ASPA, aspA; aspartoacylase [EC:3.5.1.15]	K01437	0	0	0	0	0	0	0	0	0	0	0	0	1	0	0	0	0	0	0	0	0	0	0	0	0	0	0	0	0	0	0	0	0	0	0	0	0	0	0	0	0	0	0	0	0	0	0	0
argE; acetylornithine deacetylase [EC:3.5.1.16]	K01438	2	1	1	2	1	1	0	2	3	1	1	0	0	0	0	0	0	0	3	0	0	0	1	4	0	0	1	0	0	0	2	0	1	0	0	0	1	1	1	1	0	0	2	1	0	0	0	0
dapE; succinyl-diaminopimelate desuccinylase [EC:3.5.1.18]	K01439	0	0	0	0	0	1	0	3	1	0	1	2	0	1	1	0	0	2	2	0	0	1	0	4	1	1	2	1	0	1	4	0	2	0	1	1	2	0	1	0	0	0	1	0	1	1	2	0
E3.5.1.24; choloylglycine hydrolase [EC:3.5.1.24]	K01442	0	0	0	0	0	0	0	0	0	0	0	0	1	1	0	0	0	0	1	0	0	0	0	0	0	0	0	1	1	0	1	0	0	0	0	0	0	0	1	0	0	2	0	0	0	0	0	0
nagA, AMDHD2; N-acetylglucosamine-6-phosphate deacetylase [EC:3.5.1.25]	K01443	0	0	2	0	4	2	0	0	2	0	1	0	1	0	0	0	1	0	0	0	0	1	2	1	2	0	2	0	0	0	0	0	0	0	0	0	6	0	0	1	0	0	0	0	1	0	3	0
AGA, aspG; N4-(beta-N-acetylglucosaminyl)-L-asparaginase [EC:3.5.1.26]	K01444	0	0	1	0	1	0	0	2	0	0	0	0	0	0	0	0	0	0	0	0	0	0	0	0	0	0	0	1	0	0	0	1	0	0	0	0	0	0	0	2	0	1	0	0	0	0	1	0
xlyAB; N-acetylmuramoyl-L-alanine amidase [EC:3.5.1.28]	K01447	1	0	0	0	0	0	0	0	0	0	0	0	0	0	0	0	0	0	0	0	0	0	0	3	0	0	0	0	0	0	0	0	0	0	0	0	0	0	0	0	0	0	0	0	0	0	0	0
amiABC; N-acetylmuramoyl-L-alanine amidase [EC:3.5.1.28]	K01448	6	1	0	0	0	1	2	0	0	1	1	0	1	2	0	1	1	1	1	0	2	0	0	0	0	0	0	2	1	1	1	1	1	0	1	0	1	1	2	2	0	1	1	1	1	0	0	0
cwlJ, sleB; N-acetylmuramoyl-L-alanine amidase [EC:3.5.1.28]	K01449	0	0	0	0	0	0	0	0	0	0	0	0	0	0	0	0	0	0	0	0	0	0	0	0	0	0	0	0	0	0	0	0	0	0	0	0	0	0	0	0	0	0	0	0	0	0	0	0
hipO; hippurate hydrolase [EC:3.5.1.32]	K01451	0	0	1	1	1	1	1	0	0	1	0	0	0	1	0	1	0	0	0	2	0	0	0	0	0	0	0	0	0	0	0	0	0	0	0	0	1	0	0	1	0	0	0	0	0	0	0	0
E3.5.1.41; chitin deacetylase [EC:3.5.1.41]	K01452	0	0	0	0	0	0	0	2	0	0	0	0	0	0	0	0	0	0	0	0	0	0	0	0	0	0	0	0	0	0	0	0	0	0	0	0	0	0	0	0	0	0	0	0	0	0	0	0
nylB; 6-aminohexanoate-oligomer exohydrolase [EC:3.5.1.46]	K01453	2	0	0	0	0	0	0	0	0	0	0	0	0	0	0	0	0	0	0	0	0	0	0	0	0	0	0	0	0	0	1	0	0	0	0	0	0	0	0	1	0	0	0	0	0	0	0	0
E3.5.1.49; formamidase [EC:3.5.1.49]	K01455	0	0	0	0	0	0	0	0	0	0	0	1	1	0	0	0	0	0	0	0	0	0	0	0	0	0	0	0	0	0	0	0	0	0	0	0	0	0	0	0	0	0	0	0	0	0	0	0
atzF; allophanate hydrolase [EC:3.5.1.54]	K01457	0	0	0	0	0	0	0	0	0	0	0	0	0	0	0	0	0	0	0	0	0	0	0	0	0	0	0	0	0	0	0	0	0	0	0	0	0	0	0	0	0	0	0	0	0	0	0	0
hutG; N-formylglutamate deformylase [EC:3.5.1.68]	K01458	0	0	0	0	0	0	0	0	0	0	0	0	0	0	0	0	0	0	0	0	0	0	0	0	0	0	0	0	0	0	0	0	0	0	0	0	0	0	0	0	0	0	0	0	0	0	0	0
E3.5.1.77; N-carbamoyl-D-amino-acid hydrolase [EC:3.5.1.77]	K01459	0	0	0	0	0	0	0	0	1	0	0	0	0	0	0	0	0	0	0	0	0	0	0	0	0	0	0	0	0	0	0	0	0	0	0	0	0	0	0	0	0	0	0	0	0	0	0	0
gsp; glutathionylspermidine amidase/synthetase [EC:3.5.1.78 6.3.1.8]	K01460	0	0	0	0	0	0	0	0	0	0	0	0	0	0	0	0	0	0	0	0	0	0	0	0	0	0	0	0	0	0	0	0	0	0	0	0	0	0	0	0	0	0	0	0	0	0	0	0
E3.5.1.82; N-acyl-D-glutamate deacylase [EC:3.5.1.82]	K01461	0	0	0	0	0	0	0	0	0	0	0	0	0	0	0	0	0	0	0	0	0	0	0	0	0	0	0	0	0	0	0	0	0	0	0	0	0	0	0	0	0	0	0	0	0	0	0	0
PDF, def; peptide deformylase [EC:3.5.1.88]	K01462	5	0	1	1	1	2	3	1	1	1	1	1	2	1	1	1	0	2	2	1	1	1	1	1	1	1	0	1	1	1	1	1	1	1	0	1	1	0	1	3	0	1	1	1	0	1	1	1
DPYS, dht, hydA; dihydropyrimidinase [EC:3.5.2.2]	K01464	0	0	0	0	0	0	0	1	0	2	0	3	0	0	0	0	0	0	2	0	0	0	0	0	0	0	0	0	1	2	1	0	1	0	1	0	3	0	1	0	0	1	0	0	1	0	0	0
URA4, pyrC; dihydroorotase [EC:3.5.2.3]	K01465	6	1	1	1	4	1	1	9	7	2	0	5	1	0	1	1	0	2	0	2	1	0	1	2	1	1	0	1	1	1	1	1	3	2	0	0	0	1	0	1	1	1	1	1	0	1	2	0
allB; allantoinase [EC:3.5.2.5]	K01466	0	0	0	0	0	0	0	0	0	1	0	4	0	0	0	0	0	0	0	0	0	0	0	0	0	0	0	0	0	0	1	0	2	0	0	0	0	0	0	0	0	0	0	0	0	0	0	0
ampC; beta-lactamase class C [EC:3.5.2.6]	K01467	0	0	0	0	1	0	0	0	0	1	0	0	0	0	0	0	0	0	0	0	0	0	0	1	0	0	0	0	0	0	0	0	0	0	0	0	0	0	0	1	0	0	0	0	0	0	0	0
hutI, AMDHD1; imidazolonepropionase [EC:3.5.2.7]	K01468	4	0	0	1	0	1	1	2	0	1	0	1	0	0	0	0	0	1	0	0	0	0	0	0	0	0	0	0	1	1	0	1	0	0	1	0	0	0	1	1	0	1	0	2	0	0	0	0
OPLAH, OXP1, oplAH; 5-oxoprolinase (ATP-hydrolysing) [EC:3.5.2.9]	K01469	0	0	0	0	2	1	0	0	1	1	0	0	1	0	0	0	0	0	0	0	0	1	2	1	0	0	0	0	0	0	0	0	0	0	0	0	0	1	0	1	0	0	0	0	0	0	0	0
E3.5.2.10; creatinine amidohydrolase [EC:3.5.2.10]	K01470	0	0	4	0	2	1	0	5	2	0	1	6	2	0	0	0	3	1	1	0	0	2	1	10	0	4	2	1	1	2	0	0	6	0	2	2	4	0	0	3	0	0	0	1	0	0	1	0
nylA; 6-aminohexanoate-cyclic-dimer hydrolase [EC:3.5.2.12]	K01471	0	0	0	0	0	0	0	0	0	0	0	0	0	0	0	0	0	0	0	0	0	0	0	0	0	0	0	0	0	0	1	0	0	0	0	0	0	0	0	0	0	0	0	0	0	0	0	0
hyuA; N-methylhydantoinase A [EC:3.5.2.14]	K01473	0	0	0	0	0	0	0	1	0	0	0	2	0	0	0	3	1	1	1	0	0	0	0	2	0	0	0	3	0	0	4	0	9	7	2	0	0	0	0	0	5	0	2	1	1	0	0	0
hyuB; N-methylhydantoinase B [EC:3.5.2.14]	K01474	0	0	0	0	0	0	0	2	0	1	0	2	0	0	0	2	2	0	2	0	0	0	0	2	0	0	0	3	0	0	5	0	6	4	1	0	0	0	0	0	5	0	1	1	2	0	0	0
E3.5.3.1, rocF, arg; arginase [EC:3.5.3.1]	K01476	0	0	0	0	0	0	0	2	0	1	0	0	0	1	0	0	0	0	0	0	0	0	0	0	0	0	0	0	0	0	0	0	0	0	1	0	0	0	0	0	0	0	0	0	0	0	0	0
alc, ALLC; allantoicase [EC:3.5.3.4]	K01477	0	0	0	0	0	0	0	0	0	1	0	0	0	0	0	0	0	0	0	0	0	0	0	0	0	0	0	0	0	0	0	0	0	0	0	0	0	0	0	0	0	0	0	0	0	0	0	0
arcA; arginine deiminase [EC:3.5.3.6]	K01478	0	0	0	0	0	0	0	0	0	0	0	0	0	0	0	0	0	0	0	0	0	0	0	0	0	0	0	0	0	0	0	0	0	0	0	0	2	0	0	1	0	1	0	0	0	0	0	0
hutG; formiminoglutamase [EC:3.5.3.8]	K01479	3	0	0	1	0	1	1	0	0	0	0	0	0	0	0	0	0	0	0	0	0	0	0	1	0	0	0	0	1	0	0	0	0	0	0	0	0	0	0	0	0	0	0	1	0	0	0	0
speB; agmatinase [EC:3.5.3.11]	K01480	2	0	1	1	0	0	0	0	1	1	0	1	2	1	0	1	0	1	2	0	0	0	0	1	0	1	0	0	0	0	2	0	0	0	1	1	1	0	1	0	0	1	1	3	1	0	1	0
E3.5.3.15; protein-arginine deiminase [EC:3.5.3.15]	K01481	0	0	0	0	0	0	0	0	0	2	0	0	0	0	0	0	0	0	0	0	0	0	0	0	0	0	0	0	0	0	0	0	0	0	0	0	0	0	0	0	0	0	0	0	0	0	0	0
DDAH, ddaH; dimethylargininase [EC:3.5.3.18]	K01482	0	0	0	0	0	0	1	0	0	1	0	0	0	0	0	0	0	0	0	0	0	0	0	0	0	0	0	0	1	1	0	1	0	0	0	0	0	0	0	0	0	1	0	0	0	0	0	0
allA; ureidoglycolate lyase [EC:4.3.2.3]	K01483	0	0	0	0	0	0	0	0	0	0	0	0	0	0	0	0	0	0	0	0	0	0	0	0	0	0	0	0	0	0	0	0	0	0	0	0	0	0	0	0	0	0	0	0	0	0	0	0
astB; succinylarginine dihydrolase [EC:3.5.3.23]	K01484	0	0	0	1	0	1	0	0	0	0	0	0	0	0	0	0	0	0	0	0	0	0	0	0	0	0	0	0	0	0	0	0	0	0	0	0	0	0	0	0	0	0	0	0	0	0	0	0
codA; cytosine/creatinine deaminase [EC:3.5.4.1 3.5.4.21]	K01485	0	0	0	0	0	0	0	0	0	1	0	0	1	1	0	0	0	1	0	0	0	0	0	0	0	0	0	0	0	1	1	0	0	0	0	0	1	0	0	0	0	0	1	1	0	0	0	0
ade; adenine deaminase [EC:3.5.4.2]	K01486	1	1	0	0	0	0	0	0	0	0	0	0	0	0	2	0	0	0	0	0	1	0	0	0	0	1	0	1	1	1	0	1	2	2	1	0	1	2	0	0	2	1	0	0	0	0	0	0
E3.5.4.3, guaD; guanine deaminase [EC:3.5.4.3]	K01487	0	0	0	0	0	0	0	0	0	1	0	0	0	0	0	0	0	1	0	0	0	0	0	0	0	0	0	0	0	0	0	0	1	0	0	0	0	0	0	0	0	1	0	0	0	0	0	0
add, ADA; adenosine deaminase [EC:3.5.4.4]	K01488	1	1	1	1	1	1	0	1	0	1	1	1	0	0	0	0	0	2	0	0	0	0	0	1	0	0	0	0	1	1	1	0	0	0	2	0	1	1	0	0	0	0	0	1	0	0	0	0
cdd, CDA; cytidine deaminase [EC:3.5.4.5]	K01489	3	1	1	1	1	2	0	1	1	1	0	1	0	0	0	0	0	0	0	0	0	0	1	0	0	0	0	0	1	1	0	1	0	0	0	0	0	0	1	1	0	1	0	0	0	0	0	0
folD; methylenetetrahydrofolate dehydrogenase (NADP+) / methenyltetrahydrofolate cyclohydrolase [EC:1.5.1.5 3.5.4.9]	K01491	2	1	1	2	1	1	1	1	1	1	0	0	1	1	0	1	0	0	0	0	1	2	0	1	0	0	0	1	1	1	1	1	0	1	0	1	1	0	1	1	0	2	0	1	1	1	1	0
purNH; phosphoribosylglycinamide/phosphoribosylaminoimidazolecarboxamide formyltransferase [EC:2.1.2.2 2.1.2.3]	K01492	0	0	0	0	0	0	0	0	0	0	0	0	0	0	0	0	0	0	0	0	0	0	0	0	0	1	0	0	0	0	0	0	0	0	0	0	0	0	0	0	0	0	0	0	0	0	0	0
comEB; dCMP deaminase [EC:3.5.4.12]	K01493	3	0	0	0	0	1	0	1	0	1	0	0	0	1	0	1	0	0	0	1	1	0	0	0	0	0	0	2	1	1	1	1	1	1	0	0	1	0	0	1	1	1	1	1	0	1	1	0
dcd; dCTP deaminase [EC:3.5.4.13]	K01494	0	0	1	1	1	0	1	1	1	0	0	0	1	0	0	0	0	1	0	0	0	2	1	0	0	0	1	0	0	0	0	0	0	0	0	0	0	0	1	0	0	1	0	0	0	0	1	0
GCH1, folE; GTP cyclohydrolase IA [EC:3.5.4.16]	K01495	5	0	1	1	1	0	1	0	1	1	0	0	1	0	0	0	0	1	0	1	0	1	0	1	1	0	1	1	1	1	0	1	0	1	1	0	1	1	1	2	0	0	0	0	0	1	1	1
hisI; phosphoribosyl-AMP cyclohydrolase [EC:3.5.4.19]	K01496	0	1	1	0	1	1	1	0	1	0	0	0	0	1	1	0	1	0	1	1	0	1	1	1	1	0	0	0	0	0	0	0	2	0	0	1	0	0	1	0	0	0	1	0	0	0	1	0
ribA, RIB1; GTP cyclohydrolase II [EC:3.5.4.25]	K01497	0	0	0	1	0	0	0	0	0	1	0	0	0	0	0	0	0	0	0	0	0	0	0	0	0	1	0	0	0	0	0	0	0	0	0	0	0	0	0	0	0	0	0	0	0	0	0	0
mch; methenyltetrahydromethanopterin cyclohydrolase [EC:3.5.4.27]	K01499	0	0	0	0	1	0	0	0	1	0	0	0	0	0	0	0	0	0	0	0	0	1	0	0	0	0	0	0	0	0	0	0	0	0	0	0	0	0	0	0	0	0	0	0	0	0	0	0
E3.5.5.1; nitrilase [EC:3.5.5.1]	K01501	0	0	0	0	0	0	0	2	0	0	0	0	1	0	0	0	0	0	0	0	0	0	0	0	0	0	1	0	0	0	0	0	2	0	0	0	0	0	0	1	0	2	0	0	0	0	0	0
E3.5.5.7; aliphatic nitrilase [EC:3.5.5.7]	K01502	0	0	0	0	0	0	0	0	0	0	0	0	0	0	1	0	0	0	1	0	0	0	0	0	0	0	0	0	0	0	1	0	0	0	0	0	0	0	0	0	0	0	0	1	0	0	0	1
E3.5.99.7; 1-aminocyclopropane-1-carboxylate deaminase [EC:3.5.99.7]	K01505	3	0	0	0	0	0	0	0	0	0	0	0	0	0	0	0	0	0	0	0	0	0	0	0	0	0	0	0	0	0	0	0	0	0	0	0	0	0	1	0	0	0	0	0	0	0	0	0
ppa; inorganic pyrophosphatase [EC:3.6.1.1]	K01507	2	0	0	0	0	1	1	1	3	0	0	0	1	0	0	0	0	1	0	0	0	2	0	0	0	0	0	0	0	0	0	0	0	0	0	0	1	0	1	1	0	0	0	1	0	0	0	0
acyP; acylphosphatase [EC:3.6.1.7]	K01512	0	1	0	0	1	1	1	1	0	0	0	1	0	1	1	1	1	1	1	1	1	0	1	1	0	0	1	1	0	1	1	1	1	0	1	0	0	1	0	1	1	2	0	1	0	2	1	1
ENPP1_3, CD203; ectonucleotide pyrophosphatase/phosphodiesterase family member 1/3 [EC:3.1.4.1 3.6.1.9]	K01513	0	0	0	0	0	1	0	0	0	0	0	0	0	0	0	0	0	0	0	0	0	0	0	0	0	0	0	0	0	0	0	0	0	0	0	0	0	0	0	0	0	0	0	0	0	0	0	0
PRUNE, PPX1; exopolyphosphatase [EC:3.6.1.11]	K01514	0	0	0	0	0	0	0	0	0	0	0	0	0	0	0	1	0	0	0	0	0	0	0	0	0	0	0	0	0	0	0	0	0	0	0	0	0	0	0	0	0	0	0	0	0	0	0	0
nudF; ADP-ribose pyrophosphatase [EC:3.6.1.13]	K01515	0	0	4	0	2	0	0	1	1	3	0	1	1	0	1	1	0	0	0	1	0	1	0	0	0	1	1	0	1	0	1	0	1	1	1	0	0	0	0	0	1	0	0	1	1	0	2	1
ADPRM; manganese-dependent ADP-ribose/CDP-alcohol diphosphatase [EC:3.6.1.13 3.6.1.16 3.6.1.53]	K01517	0	0	0	0	0	0	0	0	0	0	0	0	0	0	0	0	0	0	0	0	0	0	0	0	0	0	0	0	0	0	0	0	0	0	0	0	0	0	0	0	0	0	0	0	0	0	0	0
NUDT2; bis(5'-nucleosidyl)-tetraphosphatase [EC:3.6.1.17]	K01518	0	0	0	0	0	0	0	0	0	0	0	0	0	0	0	0	0	0	0	0	0	0	0	0	0	0	0	0	0	0	0	0	0	0	0	0	0	0	0	0	0	0	0	0	0	0	0	0
ITPA; inosine triphosphate pyrophosphatase [EC:3.6.1.-]	K01519	0	0	0	0	0	0	0	0	0	0	0	0	0	0	0	0	0	0	0	0	0	0	0	0	0	0	0	0	0	0	0	0	0	0	0	0	0	0	0	0	0	0	0	0	0	0	0	0
dut, DUT; dUTP pyrophosphatase [EC:3.6.1.23]	K01520	3	0	0	0	0	0	1	2	0	1	0	0	0	0	1	1	0	0	1	1	1	0	0	1	0	0	0	1	1	0	1	1	1	1	0	0	1	1	1	1	1	1	1	1	0	1	0	0
cdh; CDP-diacylglycerol pyrophosphatase [EC:3.6.1.26]	K01521	0	0	0	0	0	0	0	0	0	0	0	0	0	0	0	0	0	0	0	0	0	0	0	0	0	0	0	0	0	0	0	0	0	0	0	0	0	0	0	0	0	0	0	0	0	0	0	0
FHIT; bis(5'-adenosyl)-triphosphatase [EC:3.6.1.29]	K01522	0	0	0	0	0	0	0	0	0	0	0	0	0	0	0	0	0	0	0	0	0	0	0	0	0	0	0	0	0	0	0	0	0	0	0	0	0	0	0	0	0	0	0	0	0	0	0	0
hisE; phosphoribosyl-ATP pyrophosphohydrolase [EC:3.6.1.31]	K01523	0	0	0	0	1	0	0	0	0	0	0	0	0	0	0	0	0	0	0	0	0	0	0	0	0	0	0	0	0	0	0	0	0	0	0	0	0	0	1	0	0	0	0	0	0	0	0	0
ppx-gppA; exopolyphosphatase / guanosine-5'-triphosphate,3'-diphosphate pyrophosphatase [EC:3.6.1.11 3.6.1.40]	K01524	3	1	0	2	1	1	1	0	1	1	1	0	2	0	1	1	0	0	0	0	0	1	1	1	1	0	1	0	2	0	1	0	1	0	0	0	0	0	1	0	0	1	0	0	0	0	0	0
apaH; bis(5'-nucleosyl)-tetraphosphatase (symmetrical) [EC:3.6.1.41]	K01525	0	0	0	1	0	0	0	0	0	0	0	0	0	0	0	1	0	0	0	0	0	0	0	0	0	0	0	0	0	0	0	0	0	0	0	0	0	0	0	0	0	0	0	0	0	0	0	0
EGD1, BTF3; nascent polypeptide-associated complex subunit beta	K01527	0	0	0	0	0	0	0	0	0	0	0	0	0	0	0	0	0	0	0	0	0	0	0	0	0	0	0	0	0	0	0	0	0	0	0	0	0	0	0	0	0	0	0	0	0	0	0	0
DNM; dynamin GTPase [EC:3.6.5.5]	K01528	0	0	0	0	0	0	0	0	0	0	0	0	0	0	0	0	0	0	0	0	0	0	0	0	0	0	0	0	0	0	0	0	0	0	0	0	0	0	0	0	0	0	0	0	0	0	0	0
E7.6.2.1; phospholipid-translocating ATPase [EC:7.6.2.1]	K01530	0	0	0	0	0	0	0	0	0	0	0	0	0	0	0	0	0	0	0	0	0	0	0	0	0	0	0	0	0	0	0	0	0	0	0	0	0	0	0	0	0	0	0	0	0	0	0	0
zntA; Cd2+/Zn2+-exporting ATPase [EC:3.6.3.3 3.6.3.5]	K01534	1	1	1	0	1	1	0	2	1	0	2	0	0	1	0	0	1	0	1	0	0	0	0	2	0	1	0	0	0	0	0	0	1	0	1	0	0	0	0	0	0	1	0	0	1	0	1	0
PMA1, PMA2; H+-transporting ATPase [EC:7.1.2.1]	K01535	0	0	0	0	0	0	0	0	0	0	0	0	1	0	1	0	0	0	0	0	0	0	0	0	0	0	0	0	0	0	0	1	1	0	0	0	0	0	0	0	0	1	0	0	0	0	0	0
ATP1A; sodium/potassium-transporting ATPase subunit alpha [EC:3.6.3.9]	K01539	0	0	0	0	0	0	0	0	0	0	0	0	0	0	0	0	0	0	0	0	0	0	0	0	0	0	0	0	0	0	0	0	0	0	0	0	0	0	0	0	0	0	0	0	0	0	0	0
kdpF; K+-transporting ATPase ATPase F chain	K01545	0	0	0	0	0	0	0	0	0	0	0	0	0	0	0	0	0	0	0	0	0	0	0	0	0	0	0	0	0	0	0	0	0	0	0	0	0	0	0	0	0	0	0	0	0	0	0	0
kdpA; K+-transporting ATPase ATPase A chain [EC:3.6.3.12]	K01546	1	0	0	0	0	0	0	0	0	0	0	0	0	0	0	0	0	0	0	0	0	0	0	0	0	0	0	0	0	0	0	0	0	0	0	0	0	0	0	0	0	0	0	0	0	0	0	0
kdpB; K+-transporting ATPase ATPase B chain [EC:3.6.3.12]	K01547	1	0	0	0	0	0	0	0	0	0	0	0	0	0	0	0	0	0	0	0	0	0	0	0	0	0	0	0	0	0	0	0	0	0	0	0	0	0	0	0	0	0	0	0	0	0	0	0
kdpC; K+-transporting ATPase ATPase C chain [EC:3.6.3.12]	K01548	1	0	0	0	0	0	0	0	0	0	0	0	0	0	0	0	0	0	0	0	0	0	0	0	0	0	0	0	0	0	0	0	0	0	0	0	0	0	0	0	0	0	0	0	0	0	0	0
arsA, ASNA1, GET3; arsenite/tail-anchored protein-transporting ATPase [EC:3.6.3.16 3.6.3.-]	K01551	0	0	0	0	1	0	0	0	1	2	0	0	0	0	0	0	0	0	1	0	0	0	0	1	0	0	0	0	0	0	2	0	4	2	1	0	1	0	3	1	2	0	1	0	1	1	1	0
FAH, fahA; fumarylacetoacetase [EC:3.7.1.2]	K01555	4	0	0	0	0	0	0	0	0	0	0	0	0	0	0	0	0	0	0	0	0	0	0	0	0	0	0	0	0	0	0	0	0	0	0	0	0	0	0	0	0	1	0	0	0	0	0	0
KYNU, kynU; kynureninase [EC:3.7.1.3]	K01556	2	2	0	1	0	0	0	2	0	0	0	0	0	0	0	0	0	0	0	0	0	0	0	0	0	0	0	1	0	0	0	0	0	0	0	0	0	0	2	0	0	1	0	0	0	0	0	0
FAHD1; acylpyruvate hydrolase [EC:3.7.1.5]	K01557	0	0	0	0	0	0	0	0	0	0	0	0	0	0	0	0	0	0	0	0	0	0	0	0	0	0	0	0	0	0	0	0	0	0	0	0	0	0	0	0	0	0	0	0	0	0	0	0
E3.8.1.2; 2-haloacid dehalogenase [EC:3.8.1.2]	K01560	1	0	0	0	0	0	0	1	0	1	0	0	0	0	1	1	1	0	0	0	0	0	0	0	0	0	0	0	0	0	0	0	0	0	0	0	1	1	1	0	0	0	0	0	0	0	0	0
dehH; haloacetate dehalogenase [EC:3.8.1.3]	K01561	0	0	0	0	0	0	0	0	0	0	0	0	0	0	0	0	0	0	0	0	0	0	0	0	0	0	0	0	0	0	0	0	0	0	0	0	0	0	0	0	0	0	0	0	0	0	0	0
DIO1; type I thyroxine 5'-deiodinase [EC:1.21.99.4]	K01562	0	0	0	0	0	0	0	0	0	0	0	0	0	0	0	0	0	0	0	0	0	0	0	0	0	0	0	0	0	0	0	0	0	0	0	0	0	0	0	0	0	0	0	0	0	0	0	0
dhaA; haloalkane dehalogenase [EC:3.8.1.5]	K01563	0	2	1	3	1	1	1	2	1	5	0	1	0	2	1	1	0	1	1	2	1	2	0	1	1	0	1	0	0	0	8	0	0	1	0	0	0	0	0	0	1	0	0	6	5	0	0	0
SGSH; N-sulfoglucosamine sulfohydrolase [EC:3.10.1.1]	K01565	0	3	0	0	0	0	0	0	2	1	1	0	0	0	0	0	0	0	0	0	0	2	3	1	0	2	2	0	0	0	0	0	0	0	0	2	0	0	0	0	0	0	0	0	0	0	3	0
PDC, pdc; pyruvate decarboxylase [EC:4.1.1.1]	K01568	0	0	0	0	0	0	0	0	0	0	0	0	0	0	0	0	0	0	0	0	0	0	0	0	0	0	0	0	0	0	0	0	0	0	0	0	0	0	0	0	0	0	0	0	0	0	0	0
oxdD; oxalate decarboxylase [EC:4.1.1.2]	K01569	0	0	0	0	0	0	0	0	0	0	0	0	0	0	0	0	0	0	0	0	0	0	0	0	0	0	0	0	0	0	0	0	0	0	0	0	0	0	0	0	0	0	0	0	0	0	0	0
oadA; oxaloacetate decarboxylase (Na+ extruding), alpha subunit [EC:7.2.4.2]	K01571	0	0	0	0	0	0	1	0	0	0	0	0	0	1	2	2	0	0	2	0	0	0	0	1	0	0	0	1	0	0	1	0	2	1	1	0	0	0	0	0	0	1	1	2	1	1	0	0
oadB; oxaloacetate decarboxylase (Na+ extruding), beta subunit [EC:7.2.4.2]	K01572	0	0	0	0	0	0	1	0	1	0	1	0	0	0	1	2	0	0	1	0	1	0	0	0	0	0	0	0	0	0	1	0	1	1	0	0	1	1	0	0	1	1	0	1	0	0	0	1
oadG; oxaloacetate decarboxylase (Na+ extruding), gamma subunit [EC:7.2.4.2]	K01573	0	0	0	0	0	0	0	0	0	0	0	0	0	0	0	0	0	0	0	0	0	0	0	0	0	0	0	0	0	0	0	0	0	0	0	0	1	0	0	0	0	0	0	0	0	0	0	0
adc; acetoacetate decarboxylase [EC:4.1.1.4]	K01574	0	0	0	0	0	0	0	0	0	0	0	0	0	0	0	0	0	1	0	0	0	0	0	0	0	0	0	0	0	0	0	0	0	0	0	0	0	0	0	0	0	0	0	1	0	0	0	0
alsD, budA, aldC; acetolactate decarboxylase [EC:4.1.1.5]	K01575	1	0	0	0	0	0	0	0	0	0	0	0	0	0	0	0	0	0	0	0	1	0	1	0	0	0	0	0	0	0	0	0	0	2	0	0	0	0	1	1	0	0	1	1	0	0	0	0
mdlC; benzoylformate decarboxylase [EC:4.1.1.7]	K01576	0	0	0	0	0	0	0	0	0	1	0	1	0	0	0	0	0	0	0	0	0	0	1	0	0	0	1	0	0	0	1	0	2	0	0	0	0	0	0	0	0	0	0	0	0	0	0	0
oxc; oxalyl-CoA decarboxylase [EC:4.1.1.8]	K01577	0	0	0	0	0	0	0	0	0	0	0	0	0	0	0	0	0	0	0	0	0	0	0	0	0	0	0	0	0	0	0	0	0	0	0	0	0	0	0	0	0	0	0	0	0	0	0	0
MLYCD; malonyl-CoA decarboxylase [EC:4.1.1.9]	K01578	0	0	0	0	0	0	0	0	0	0	0	0	0	0	0	1	0	0	0	0	0	0	0	0	0	0	0	0	0	0	1	0	1	0	0	0	0	0	0	0	0	1	0	0	0	0	0	0
panD; aspartate 1-decarboxylase [EC:4.1.1.11]	K01579	3	0	1	1	1	1	1	0	1	0	0	0	0	0	0	1	0	0	0	1	0	1	0	1	0	0	1	1	1	0	0	1	0	1	0	1	0	0	0	1	0	0	0	0	1	1	1	1
E4.1.1.15, gadB, gadA, GAD; glutamate decarboxylase [EC:4.1.1.15]	K01580	0	0	0	0	0	0	0	0	0	0	0	0	0	2	1	0	0	0	0	0	1	1	1	0	0	0	0	0	0	0	0	0	0	0	0	0	0	0	0	0	1	1	0	0	0	0	0	0
E4.1.1.17, ODC1, speC, speF; ornithine decarboxylase [EC:4.1.1.17]	K01581	0	0	0	0	0	1	0	0	1	0	0	0	0	0	0	0	0	0	0	0	0	0	0	0	0	0	0	0	0	0	0	0	0	1	0	0	0	0	0	0	1	0	0	0	0	0	0	0
E4.1.1.18, ldcC, cadA; lysine decarboxylase [EC:4.1.1.18]	K01582	0	0	0	0	0	0	0	0	0	0	0	0	1	0	1	0	0	0	0	0	0	0	0	0	0	0	0	0	0	0	0	0	0	0	0	0	0	0	0	0	0	1	0	0	0	0	0	0
E4.1.1.19; arginine decarboxylase [EC:4.1.1.19]	K01583	0	0	0	0	0	0	0	0	0	0	0	0	0	0	0	0	0	0	0	0	0	0	0	0	0	0	0	0	0	0	0	0	0	0	0	0	0	0	0	0	0	0	0	0	0	0	0	0
adiA; arginine decarboxylase [EC:4.1.1.19]	K01584	1	0	0	0	1	0	0	2	0	0	0	0	0	0	1	0	0	0	0	0	0	0	0	0	0	0	0	0	0	0	0	0	0	0	0	0	0	0	0	0	0	1	0	0	0	0	0	0
speA; arginine decarboxylase [EC:4.1.1.19]	K01585	2	1	1	0	1	1	1	2	1	1	0	0	1	0	0	0	0	1	0	0	0	0	1	0	0	0	2	0	0	0	0	0	0	0	0	0	1	0	0	0	0	1	0	0	0	0	0	0
lysA; diaminopimelate decarboxylase [EC:4.1.1.20]	K01586	4	1	1	1	0	1	1	1	1	1	3	0	0	0	1	1	0	1	1	0	1	1	2	1	0	0	2	0	1	1	2	1	0	1	0	1	1	2	1	2	0	1	1	1	0	1	2	1
PAICS; phosphoribosylaminoimidazole carboxylase / phosphoribosylaminoimidazole-succinocarboxamide synthase [EC:4.1.1.21 6.3.2.6]	K01587	0	0	0	0	0	0	0	0	0	0	0	0	0	0	0	0	0	1	0	0	0	0	0	0	0	0	0	0	0	0	0	0	0	0	0	0	0	0	0	0	0	0	0	0	0	0	0	0
purE; 5-(carboxyamino)imidazole ribonucleotide mutase [EC:5.4.99.18]	K01588	3	0	1	1	1	1	2	1	1	0	0	0	1	0	1	0	0	1	0	0	0	1	0	1	1	1	1	1	1	1	1	1	1	1	0	1	1	0	1	1	1	1	1	0	0	1	1	1
purK; 5-(carboxyamino)imidazole ribonucleotide synthase [EC:6.3.4.18]	K01589	4	0	1	1	1	1	2	0	1	0	0	0	1	0	0	0	0	0	0	0	0	0	0	0	0	0	0	0	0	0	0	0	0	0	0	0	0	0	1	0	0	0	0	0	0	0	0	0
hdc, HDC; histidine decarboxylase [EC:4.1.1.22]	K01590	0	0	1	0	0	0	0	0	0	0	0	0	0	0	0	0	0	0	0	0	0	0	0	0	0	0	0	0	0	0	0	0	0	0	0	0	0	0	0	0	0	0	0	0	0	0	0	0
pyrF; orotidine-5'-phosphate decarboxylase [EC:4.1.1.23]	K01591	2	1	1	1	1	2	1	1	1	2	0	0	1	1	0	1	0	0	0	0	0	0	0	0	1	0	2	1	0	1	1	1	1	1	0	1	0	1	1	2	1	0	1	1	1	2	1	1
DDC, TDC; aromatic-L-amino-acid/L-tryptophan decarboxylase [EC:4.1.1.28 4.1.1.105]	K01593	0	0	0	0	0	0	0	1	0	0	0	0	0	0	0	0	0	0	0	0	0	0	0	0	0	0	0	1	0	0	0	0	1	0	1	0	0	1	1	1	0	1	0	1	0	0	0	0
CSAD; sulfinoalanine decarboxylase [EC:4.1.1.29]	K01594	0	0	0	0	0	0	0	0	0	0	0	0	1	0	0	0	0	0	0	0	0	0	0	0	0	0	0	0	0	0	0	0	0	0	0	0	0	0	0	0	0	0	0	0	0	0	0	0
ppc; phosphoenolpyruvate carboxylase [EC:4.1.1.31]	K01595	4	0	0	0	1	0	0	1	2	0	0	0	1	0	0	0	0	0	0	0	0	0	0	0	0	0	0	0	1	0	0	0	0	0	0	0	0	0	2	0	0	0	0	0	0	0	0	0
E4.1.1.32, pckA, PCK; phosphoenolpyruvate carboxykinase (GTP) [EC:4.1.1.32]	K01596	0	1	0	0	1	1	0	0	1	1	0	1	0	1	1	1	0	0	1	0	0	0	1	1	1	0	1	0	0	1	1	0	0	1	0	1	1	0	1	0	0	0	0	1	0	1	1	0
MVD, mvaD; diphosphomevalonate decarboxylase [EC:4.1.1.33]	K01597	2	0	0	1	0	0	0	0	0	1	0	0	0	0	0	0	0	0	0	0	0	0	0	0	0	0	0	0	0	0	0	1	0	0	0	0	0	0	0	2	0	1	0	0	0	0	1	0
PPCDC, coaC; phosphopantothenoylcysteine decarboxylase [EC:4.1.1.36]	K01598	0	0	1	0	0	0	0	0	0	0	0	0	0	0	0	0	0	0	0	0	0	0	0	0	0	0	0	0	0	0	0	0	0	0	0	0	0	0	0	0	0	0	0	0	0	0	0	0
hemE, UROD; uroporphyrinogen decarboxylase [EC:4.1.1.37]	K01599	4	0	1	1	0	3	1	1	1	3	8	8	1	1	4	1	11	2	3	18	0	17	17	44	8	29	28	0	3	2	17	0	9	0	3	10	30	2	0	2	3	2	1	20	4	0	18	1
rbcS; ribulose-bisphosphate carboxylase small chain [EC:4.1.1.39]	K01602	0	0	0	0	0	0	0	0	0	0	0	0	0	0	0	0	0	0	0	0	0	0	0	0	0	0	0	0	0	0	0	0	0	0	0	0	0	0	0	0	0	0	0	0	0	0	0	0
pcaC; 4-carboxymuconolactone decarboxylase [EC:4.1.1.44]	K01607	2	0	0	0	0	0	0	1	1	0	0	1	0	1	3	1	0	0	0	0	0	0	0	0	0	0	0	0	1	0	1	0	2	0	0	0	0	0	0	0	0	0	0	1	1	0	0	0
gcl; tartronate-semialdehyde synthase [EC:4.1.1.47]	K01608	0	0	0	0	0	0	0	0	0	0	0	0	0	0	0	0	0	0	0	0	0	0	0	0	0	0	0	0	0	0	0	0	0	0	0	0	0	0	0	0	0	0	0	0	0	0	0	0
trpC; indole-3-glycerol phosphate synthase [EC:4.1.1.48]	K01609	4	0	1	0	1	1	1	1	1	1	2	0	0	1	0	2	0	0	0	0	1	1	1	1	0	0	1	0	0	0	1	0	1	1	0	1	0	1	1	1	0	0	1	1	1	2	1	1
E4.1.1.49, pckA; phosphoenolpyruvate carboxykinase (ATP) [EC:4.1.1.49]	K01610	7	0	1	1	0	0	1	1	1	0	0	0	0	0	0	0	0	0	0	1	0	1	0	0	0	0	0	1	1	0	0	1	1	0	1	0	0	3	0	1	0	1	0	0	2	0	0	1
speD, AMD1; S-adenosylmethionine decarboxylase [EC:4.1.1.50]	K01611	0	0	0	0	0	0	0	0	1	0	0	0	1	0	0	0	0	0	0	0	0	0	0	0	0	0	1	1	0	0	1	0	0	2	0	0	0	0	0	0	0	0	0	2	0	0	0	1
bsdC; vanillate/4-hydroxybenzoate decarboxylase subunit C [EC:4.1.1.- 4.1.1.61]	K01612	0	0	0	0	0	0	0	0	0	0	0	0	0	0	0	0	0	0	0	0	0	0	0	0	0	0	0	0	0	0	0	0	0	0	0	0	0	0	0	0	0	0	0	0	0	0	0	0
psd, PISD; phosphatidylserine decarboxylase [EC:4.1.1.65]	K01613	3	2	1	1	0	1	1	0	1	1	1	2	0	1	1	1	0	0	1	1	1	1	0	0	1	1	0	0	1	1	2	1	2	0	1	0	0	1	0	1	0	1	1	1	2	0	1	0
gcdA; glutaconyl-CoA decarboxylase [EC:4.1.1.70]	K01615	0	0	0	0	0	0	0	0	0	0	0	0	0	1	1	1	0	1	0	0	0	0	0	0	0	0	0	0	0	0	1	1	1	1	0	0	0	0	0	0	0	0	0	0	0	0	0	0
dmpH, xylI, nahK; 2-oxo-3-hexenedioate decarboxylase [EC:4.1.1.77]	K01617	0	0	0	1	0	0	0	0	0	0	0	0	0	0	0	0	0	0	0	0	0	0	0	0	0	0	0	0	0	0	0	0	0	0	0	0	0	0	0	0	0	0	0	0	0	0	0	0
deoC, DERA; deoxyribose-phosphate aldolase [EC:4.1.2.4]	K01619	3	0	1	1	1	1	0	1	1	1	0	0	1	0	0	1	0	1	0	0	0	1	1	0	1	0	3	0	1	1	0	1	0	0	1	2	2	2	1	2	0	1	0	0	0	0	4	0
ltaE; threonine aldolase [EC:4.1.2.48]	K01620	3	1	1	1	1	2	1	1	1	1	0	1	0	1	0	0	1	1	1	1	0	1	1	1	1	1	2	1	1	1	1	0	1	0	0	1	1	1	1	1	0	1	1	1	1	0	2	0
xfp, xpk; xylulose-5-phosphate/fructose-6-phosphate phosphoketolase [EC:4.1.2.9 4.1.2.22]	K01621	0	0	0	0	1	0	1	0	2	0	0	0	1	0	0	0	0	0	0	0	0	0	0	0	0	0	0	0	0	0	0	0	0	0	0	0	0	0	0	0	0	0	0	0	0	0	0	0
K01622; fructose 1,6-bisphosphate aldolase/phosphatase [EC:4.1.2.13 3.1.3.11]	K01622	0	0	0	0	0	0	0	0	0	0	0	0	0	0	0	0	0	0	0	0	0	0	0	0	0	0	0	0	0	0	0	0	0	1	0	0	0	0	0	0	1	0	0	0	0	0	0	1
ALDO; fructose-bisphosphate aldolase, class I [EC:4.1.2.13]	K01623	0	0	0	0	0	0	0	0	1	0	0	0	1	0	0	0	0	0	0	0	0	0	0	0	0	0	0	0	0	0	0	0	0	0	0	0	0	0	0	0	0	0	0	0	0	0	0	0
FBA, fbaA; fructose-bisphosphate aldolase, class II [EC:4.1.2.13]	K01624	3	0	0	0	2	1	0	0	1	0	0	0	2	0	2	1	2	0	2	1	2	1	4	1	2	0	1	0	1	1	1	1	0	0	2	2	4	1	1	2	0	1	0	1	0	1	2	0
eda; 2-dehydro-3-deoxyphosphogluconate aldolase / (4S)-4-hydroxy-2-oxoglutarate aldolase [EC:4.1.2.14 4.1.3.42]	K01625	3	1	1	0	1	1	1	0	1	0	0	0	1	0	0	1	0	0	0	0	0	1	1	1	0	0	0	0	0	0	0	0	0	1	0	0	2	1	0	1	0	0	0	0	0	1	2	0
E2.5.1.54, aroF, aroG, aroH; 3-deoxy-7-phosphoheptulonate synthase [EC:2.5.1.54]	K01626	0	0	0	1	1	2	0	0	1	0	0	0	0	0	0	1	0	0	0	0	0	1	0	0	0	0	0	0	0	0	0	0	0	0	0	0	1	0	1	0	0	0	0	0	0	0	2	0
kdsA; 2-dehydro-3-deoxyphosphooctonate aldolase (KDO 8-P synthase) [EC:2.5.1.55]	K01627	3	0	1	0	1	1	1	1	1	0	0	0	0	2	0	2	0	2	0	0	1	2	1	0	1	1	1	1	0	1	1	1	2	0	0	1	0	0	0	1	0	0	1	1	0	0	2	0
fucA; L-fuculose-phosphate aldolase [EC:4.1.2.17]	K01628	0	1	1	0	1	0	0	0	2	3	0	0	0	0	0	0	1	0	0	0	0	1	3	1	0	1	1	0	0	0	0	1	2	1	0	0	2	0	0	0	0	0	0	0	0	1	1	0
rhaD; rhamnulose-1-phosphate aldolase [EC:4.1.2.19]	K01629	0	0	0	0	0	0	0	0	0	0	0	0	0	0	0	0	0	0	0	0	0	0	0	1	0	0	0	0	0	0	1	0	0	0	0	0	0	0	0	0	0	0	0	0	0	0	0	0
garL; 2-dehydro-3-deoxyglucarate aldolase [EC:4.1.2.20]	K01630	0	0	2	1	0	1	0	0	3	1	0	2	0	0	0	2	3	1	0	1	0	0	1	1	1	2	2	0	0	0	1	0	0	1	0	0	3	0	0	0	0	0	0	2	0	0	1	0
dgoA; 2-dehydro-3-deoxyphosphogalactonate aldolase [EC:4.1.2.21]	K01631	0	0	0	0	0	0	0	0	0	0	0	0	0	0	0	0	0	0	0	0	0	0	0	0	0	0	0	0	0	0	2	0	1	0	0	0	0	0	0	0	0	0	0	1	0	0	0	0
folB; 7,8-dihydroneopterin aldolase/epimerase/oxygenase [EC:4.1.2.25 5.1.99.8 1.13.11.81]	K01633	1	0	0	0	0	0	0	0	0	1	0	0	1	0	0	0	0	0	0	1	0	0	0	0	0	0	0	0	1	0	0	1	0	0	1	0	0	0	0	1	0	1	0	0	0	0	1	0
SGPL1, DPL1; sphinganine-1-phosphate aldolase [EC:4.1.2.27]	K01634	0	0	0	0	0	0	0	0	0	0	0	0	0	0	0	0	0	0	0	0	0	0	0	0	0	0	0	0	0	0	0	0	0	0	0	0	0	0	0	0	0	0	0	0	0	0	0	0
lacD; tagatose 1,6-diphosphate aldolase [EC:4.1.2.40]	K01635	0	0	1	0	0	0	0	0	0	0	1	0	0	0	0	0	0	0	0	0	0	0	0	0	0	0	0	0	0	0	0	0	0	2	0	0	0	0	1	0	0	0	0	0	0	0	0	0
E4.1.3.1, aceA; isocitrate lyase [EC:4.1.3.1]	K01637	2	0	0	0	0	0	0	0	0	2	0	2	0	0	0	0	0	0	0	0	0	0	0	0	0	0	0	0	0	0	0	0	0	0	0	0	0	0	0	0	0	0	0	0	0	0	0	0
aceB, glcB; malate synthase [EC:2.3.3.9]	K01638	2	0	0	0	0	0	0	0	0	1	0	1	0	0	0	0	0	0	0	0	0	0	0	0	0	0	0	0	0	0	0	0	0	0	0	0	0	0	0	0	0	0	0	0	0	0	0	0
E4.1.3.3, nanA, NPL; N-acetylneuraminate lyase [EC:4.1.3.3]	K01639	0	1	1	0	1	0	0	0	1	0	0	0	0	0	0	0	0	0	1	0	0	1	0	1	1	1	0	0	0	0	0	0	1	0	0	1	4	0	0	0	0	0	0	0	0	0	1	0
E4.1.3.4, HMGCL, hmgL; hydroxymethylglutaryl-CoA lyase [EC:4.1.3.4]	K01640	4	0	0	1	0	1	0	0	0	1	0	4	0	1	1	0	0	2	1	0	1	0	0	0	0	0	0	0	0	0	1	2	2	0	0	0	0	0	0	0	0	1	0	2	0	0	0	0
E2.3.3.10; hydroxymethylglutaryl-CoA synthase [EC:2.3.3.10]	K01641	1	0	0	0	0	0	0	0	0	0	0	0	0	0	0	0	0	0	0	0	0	0	0	0	0	0	0	1	0	0	0	0	0	0	0	0	0	1	0	0	1	0	0	0	0	0	1	0
citF; citrate lyase subunit alpha / citrate CoA-transferase [EC:2.8.3.10]	K01643	1	0	0	0	0	0	0	0	0	0	0	0	0	0	0	0	0	0	0	0	0	0	0	0	0	0	0	0	1	1	0	0	0	0	0	0	1	1	0	2	0	1	0	0	0	0	0	0
citE; citrate lyase subunit beta / citryl-CoA lyase [EC:4.1.3.34]	K01644	1	0	0	1	0	0	0	0	0	0	0	2	0	1	0	0	0	0	0	0	0	0	0	0	0	0	0	0	1	1	1	0	1	1	0	0	1	1	1	1	0	2	2	0	0	0	0	0
CS, gltA; citrate synthase [EC:2.3.3.1]	K01647	3	1	1	1	1	1	1	2	1	3	0	1	1	2	1	1	1	0	0	1	1	1	0	4	0	2	1	1	2	1	1	1	0	0	1	0	1	2	1	1	0	1	0	1	0	1	2	0
ACLY; ATP citrate (pro-S)-lyase [EC:2.3.3.8]	K01648	0	0	0	0	0	0	0	0	0	0	0	0	0	0	0	0	0	0	0	0	0	0	0	0	0	0	0	0	0	0	0	0	1	0	0	0	0	0	0	0	0	0	0	0	0	0	0	0
leuA, IMS; 2-isopropylmalate synthase [EC:2.3.3.13]	K01649	2	1	2	0	3	2	3	3	2	1	1	2	1	2	1	3	0	0	0	2	3	2	1	2	1	1	1	0	2	0	2	0	3	2	0	1	3	0	1	1	2	0	2	2	2	2	2	0
E2.2.1.6L, ilvB, ilvG, ilvI; acetolactate synthase I/II/III large subunit [EC:2.2.1.6]	K01652	5	0	1	0	3	1	2	2	2	3	1	10	1	1	2	4	1	2	8	1	2	2	2	3	0	1	5	0	0	0	7	0	8	2	3	1	2	1	2	2	2	0	4	7	8	3	3	1
E2.2.1.6S, ilvH, ilvN; acetolactate synthase I/III small subunit [EC:2.2.1.6]	K01653	1	1	1	0	1	1	1	0	1	0	0	0	1	1	0	1	0	0	2	1	1	1	0	1	1	0	0	0	1	0	1	0	1	1	0	1	1	1	1	1	1	0	1	1	1	1	2	1
E2.5.1.56, neuB; N-acetylneuraminate synthase [EC:2.5.1.56]	K01654	8	0	0	0	0	1	1	1	0	0	0	0	0	1	0	2	1	1	0	0	0	0	1	1	0	0	0	1	0	0	1	0	0	2	0	0	1	1	1	2	0	0	1	5	0	0	1	0
LYS21, LYS20; homocitrate synthase [EC:2.3.3.14]	K01655	0	0	0	0	0	0	0	0	0	0	0	0	0	0	0	0	0	0	0	0	0	0	0	0	0	0	0	0	0	0	0	0	0	0	0	0	0	0	0	0	0	0	0	0	0	0	0	0
TRP3; anthranilate synthase / indole-3-glycerol phosphate synthase [EC:4.1.3.27 4.1.1.48]	K01656	0	0	0	0	0	0	0	0	0	0	0	0	0	0	0	0	0	0	0	0	0	0	0	0	0	0	0	0	0	0	0	0	0	0	0	0	0	0	0	0	0	0	0	0	0	0	0	0
trpE; anthranilate synthase component I [EC:4.1.3.27]	K01657	5	1	1	0	1	1	2	0	1	2	0	0	1	1	1	1	0	0	1	2	1	0	2	1	0	1	1	0	0	0	0	0	1	1	0	1	1	1	1	1	1	0	1	0	1	1	1	1
trpG; anthranilate synthase component II [EC:4.1.3.27]	K01658	3	1	1	1	3	1	1	1	3	1	0	0	0	1	1	1	0	0	1	1	1	2	1	2	0	1	0	0	1	0	0	0	2	1	0	1	0	1	0	1	1	1	1	2	0	1	1	0
prpC; 2-methylcitrate synthase [EC:2.3.3.5]	K01659	0	0	0	0	2	1	0	0	1	0	0	0	0	0	0	0	0	0	0	0	0	0	0	0	0	0	0	0	0	0	0	0	0	0	0	0	0	0	0	0	0	0	0	0	0	0	0	0
menB; naphthoate synthase [EC:4.1.3.36]	K01661	2	1	0	2	0	1	0	3	0	1	0	0	1	1	0	0	0	0	1	0	0	0	0	0	0	0	0	0	1	0	1	0	1	1	0	0	0	0	2	0	0	1	0	2	1	0	1	0
dxs; 1-deoxy-D-xylulose-5-phosphate synthase [EC:2.2.1.7]	K01662	5	1	1	0	1	1	1	1	1	0	1	0	0	0	0	1	1	0	0	0	1	2	1	1	1	1	1	1	1	1	1	1	2	1	0	1	0	2	2	2	1	1	1	1	1	1	1	1
HIS7; imidazole glycerol-phosphate synthase [EC:4.3.2.10]	K01663	0	0	0	0	0	0	0	0	0	0	0	0	0	1	0	2	0	0	1	0	0	0	0	0	0	0	0	0	0	0	0	0	0	0	0	0	0	0	0	0	0	0	0	4	0	0	2	0
pabA; para-aminobenzoate synthetase component II [EC:2.6.1.85]	K01664	0	1	1	0	0	0	1	0	0	0	0	0	1	0	1	0	0	0	1	1	0	1	0	2	0	0	0	0	0	0	0	0	1	0	0	0	0	0	0	0	0	0	1	0	0	0	0	0
pabB; para-aminobenzoate synthetase component I [EC:2.6.1.85]	K01665	4	0	1	0	1	0	1	0	1	1	0	0	1	1	0	0	0	0	0	0	0	1	0	1	0	0	0	0	1	0	0	0	0	0	0	1	0	0	1	1	1	1	0	1	0	0	1	0
mhpE; 4-hydroxy 2-oxovalerate aldolase [EC:4.1.3.39]	K01666	0	0	0	0	0	0	1	0	0	0	1	0	0	0	0	1	0	0	0	0	0	1	1	0	0	0	0	0	0	0	1	0	0	1	0	1	1	0	0	1	0	0	0	0	0	1	1	0
tnaA; tryptophanase [EC:4.1.99.1]	K01667	0	0	0	0	0	1	0	1	0	2	0	0	0	0	0	0	0	0	0	0	0	0	0	0	0	0	0	0	1	1	0	1	0	0	0	0	1	1	1	0	0	1	0	0	0	0	0	0
E4.1.99.2; tyrosine phenol-lyase [EC:4.1.99.2]	K01668	0	0	0	0	0	0	0	0	0	0	0	0	0	0	0	0	0	0	0	0	0	0	0	0	0	0	0	0	1	1	0	0	0	1	0	0	1	0	0	0	0	0	0	0	0	0	0	0
phrB; deoxyribodipyrimidine photo-lyase [EC:4.1.99.3]	K01669	11	2	0	1	1	2	0	0	1	0	0	0	4	0	0	2	0	0	0	0	0	0	0	0	0	0	0	0	0	0	0	0	0	0	0	0	0	0	2	0	0	0	0	0	0	0	1	0
nmsA; naphthyl-2-methylsuccinate synthase alpha subunit [EC:4.1.99.-]	K01670	0	0	0	0	0	0	0	0	0	0	0	0	0	0	0	0	0	0	0	0	0	0	0	0	0	0	0	0	0	0	0	0	0	0	0	0	0	0	0	0	0	0	0	0	0	0	0	0
yihT; sulfofructosephosphate aldolase [EC:4.1.2.57]	K01671	0	0	0	0	0	0	0	0	0	0	0	0	0	0	0	0	0	0	0	0	0	0	0	0	0	0	0	0	0	0	0	0	0	0	0	0	0	0	1	0	0	0	0	0	0	0	0	0
cynT, can; carbonic anhydrase [EC:4.2.1.1]	K01673	4	0	2	2	0	2	1	1	1	1	0	0	1	0	0	1	0	0	0	0	0	1	0	0	0	0	1	0	0	0	0	0	0	0	0	0	0	0	2	0	0	1	0	0	0	1	0	0
cah; carbonic anhydrase [EC:4.2.1.1]	K01674	0	0	0	0	0	0	0	0	0	0	0	0	0	0	0	0	0	0	0	0	0	0	0	0	0	0	0	0	0	0	0	0	0	0	0	0	0	0	0	0	0	0	0	0	0	0	0	0
E4.2.1.2A, fumA, fumB; fumarate hydratase, class I [EC:4.2.1.2]	K01676	2	2	1	1	0	1	0	0	0	1	0	0	0	0	0	0	0	0	1	0	1	0	0	2	0	0	0	0	2	2	1	0	0	0	1	0	0	0	1	1	0	0	0	1	2	0	0	0
E4.2.1.2AA, fumA; fumarate hydratase subunit alpha [EC:4.2.1.2]	K01677	0	0	0	0	0	0	0	0	0	0	0	0	0	0	0	1	0	0	0	0	0	0	0	0	0	0	0	1	0	0	0	0	3	1	0	0	2	0	0	0	0	0	1	0	0	1	1	0
E4.2.1.2AB, fumB; fumarate hydratase subunit beta [EC:4.2.1.2]	K01678	0	0	0	0	0	0	0	0	0	0	0	0	0	0	0	1	1	0	0	0	0	0	0	0	0	0	0	1	0	0	0	0	1	1	0	1	2	0	0	0	0	0	1	0	0	2	0	0
E4.2.1.2B, fumC, FH; fumarate hydratase, class II [EC:4.2.1.2]	K01679	2	0	0	0	1	1	1	2	1	0	0	1	1	1	0	1	1	0	0	1	0	1	1	1	0	0	0	0	0	0	0	1	0	0	0	0	0	0	0	0	0	1	0	1	0	0	1	0
ACO, acnA; aconitate hydratase [EC:4.2.1.3]	K01681	4	1	1	2	2	1	1	2	1	3	2	2	0	2	1	1	0	1	0	0	1	1	1	0	0	0	2	0	2	1	1	1	0	0	0	1	1	1	2	1	0	1	1	1	1	0	1	0
acnB; aconitate hydratase 2 / 2-methylisocitrate dehydratase [EC:4.2.1.3 4.2.1.99]	K01682	1	0	0	0	0	1	0	0	0	0	0	0	1	0	0	1	0	0	0	0	0	0	0	0	0	0	0	1	0	0	0	0	0	0	0	0	0	0	0	0	0	0	0	0	0	0	0	0
araD; D-arabinonate dehydratase [EC:4.2.1.5]	K01683	0	0	0	0	0	1	0	0	0	0	0	1	0	0	0	0	0	0	0	0	0	0	1	0	0	0	0	0	0	0	0	0	0	0	0	0	0	0	0	0	0	0	1	0	0	0	0	0
dgoD; galactonate dehydratase [EC:4.2.1.6]	K01684	0	0	1	0	2	2	0	0	5	1	1	0	0	0	0	0	2	1	1	1	0	0	2	4	0	0	0	0	0	0	0	0	0	0	0	0	0	0	0	0	0	0	0	0	0	0	0	0
uxaA; altronate hydrolase [EC:4.2.1.7]	K01685	2	0	1	0	1	1	0	0	1	0	0	1	0	0	0	0	0	0	0	0	0	1	2	1	0	2	0	0	0	0	0	0	1	0	0	0	0	0	0	0	0	0	0	0	0	0	0	0
uxuA; mannonate dehydratase [EC:4.2.1.8]	K01686	4	1	0	0	1	2	0	0	2	0	0	0	0	0	0	0	0	0	0	0	0	1	0	4	0	0	1	0	0	0	0	0	0	0	0	1	0	0	0	1	0	0	0	0	0	0	1	0
ilvD; dihydroxy-acid dehydratase [EC:4.2.1.9]	K01687	2	1	1	0	2	1	1	0	2	0	0	2	1	1	2	1	1	0	5	0	1	0	0	2	1	3	1	0	0	0	5	0	7	2	1	1	3	1	1	2	1	0	1	1	2	2	2	0
ENO, eno; enolase [EC:4.2.1.11]	K01689	2	0	1	1	1	2	1	2	2	1	1	0	1	1	0	1	0	1	1	1	1	1	1	1	0	0	0	1	1	2	1	1	1	1	0	1	1	1	1	1	1	1	2	1	2	1	1	1
edd; phosphogluconate dehydratase [EC:4.2.1.12]	K01690	0	0	0	0	0	0	1	0	0	0	0	0	0	0	0	0	0	0	0	0	0	0	0	0	0	0	0	0	0	0	0	0	0	0	0	0	0	0	0	0	0	0	0	0	0	0	0	0
paaF, echA; enoyl-CoA hydratase [EC:4.2.1.17]	K01692	0	0	0	3	1	2	0	0	0	1	0	1	0	0	3	0	0	1	3	1	0	0	0	1	0	0	0	0	0	0	17	0	8	6	1	0	0	0	2	0	7	0	0	5	2	0	0	1
hisB; imidazoleglycerol-phosphate dehydratase [EC:4.2.1.19]	K01693	0	1	1	0	1	1	1	0	1	2	0	0	1	0	1	1	0	0	0	0	0	1	1	0	1	1	2	0	0	0	1	0	0	1	0	0	0	0	1	0	0	0	1	2	0	1	1	0
TRP; tryptophan synthase [EC:4.2.1.20]	K01694	0	0	0	0	0	0	0	0	0	0	0	0	0	0	0	0	0	0	0	0	0	0	0	0	0	0	0	0	0	0	0	0	0	0	0	0	0	0	0	0	0	0	0	0	0	0	0	0
trpA; tryptophan synthase alpha chain [EC:4.2.1.20]	K01695	4	2	1	0	1	1	1	1	1	1	1	1	1	1	0	0	0	0	1	0	1	0	0	1	0	0	0	0	1	0	1	0	1	1	0	0	2	1	0	1	1	1	1	0	2	1	1	0
trpB; tryptophan synthase beta chain [EC:4.2.1.20]	K01696	4	0	2	0	1	1	1	1	1	1	0	1	2	1	0	0	0	0	1	0	1	0	0	1	0	0	0	0	1	0	1	0	1	1	0	0	1	1	1	1	0	1	1	1	1	1	1	0
CBS; cystathionine beta-synthase [EC:4.2.1.22]	K01697	8	0	0	1	0	0	0	2	0	1	0	0	0	0	0	1	0	1	0	0	0	0	0	0	0	0	0	1	0	0	0	0	0	0	0	0	0	0	1	0	0	0	0	0	0	0	0	0
hemB, ALAD; porphobilinogen synthase [EC:4.2.1.24]	K01698	6	0	1	2	1	1	1	2	1	2	0	0	1	1	0	1	0	0	0	0	0	1	0	1	2	0	0	0	1	0	1	0	1	1	0	1	0	1	0	0	1	1	1	1	0	1	1	0
pduC; propanediol dehydratase large subunit [EC:4.2.1.28]	K01699	0	0	0	0	0	0	0	0	0	0	0	0	0	0	0	0	0	0	0	0	0	0	0	0	0	0	0	0	0	0	0	0	0	0	0	0	0	0	0	0	0	0	0	0	0	0	0	0
LEU1; 3-isopropylmalate dehydratase [EC:4.2.1.33]	K01702	0	0	0	0	0	0	0	0	0	0	0	0	0	0	0	0	0	0	0	0	0	0	0	0	0	0	0	0	0	0	0	0	0	0	0	0	0	0	0	0	0	0	0	0	0	0	0	0
leuC, IPMI-L; 3-isopropylmalate/(R)-2-methylmalate dehydratase large subunit [EC:4.2.1.33 4.2.1.35]	K01703	4	1	1	0	1	1	1	4	1	1	1	3	1	1	0	1	1	0	0	0	0	2	1	1	2	1	0	0	1	0	2	0	1	1	0	0	3	0	1	1	1	0	1	1	2	2	2	2
leuD, IPMI-S; 3-isopropylmalate/(R)-2-methylmalate dehydratase small subunit [EC:4.2.1.33 4.2.1.35]	K01704	4	1	1	0	1	1	1	3	1	0	1	3	1	0	0	1	0	0	0	1	0	1	1	0	1	0	1	0	1	0	2	0	0	1	0	0	2	0	1	0	1	0	1	1	1	2	2	3
LYS4; homoaconitate hydratase [EC:4.2.1.36]	K01705	0	0	0	0	0	0	0	0	0	0	0	0	0	0	0	0	0	0	0	0	0	0	0	0	0	0	0	0	1	1	0	0	0	0	0	0	0	0	0	0	0	0	0	0	0	0	0	0
gudD; glucarate dehydratase [EC:4.2.1.40]	K01706	0	1	0	0	0	0	0	0	0	0	0	0	0	0	0	0	0	0	1	0	0	0	0	0	0	0	0	0	0	0	0	0	0	0	0	0	0	0	0	0	0	0	0	0	0	0	0	0
kdgD; 5-dehydro-4-deoxyglucarate dehydratase [EC:4.2.1.41]	K01707	0	0	0	0	0	0	0	0	0	0	0	0	0	0	0	0	0	0	0	0	0	0	0	1	0	0	1	0	0	0	0	0	0	0	0	0	0	0	0	0	0	0	0	0	0	0	0	0
garD; galactarate dehydratase [EC:4.2.1.42]	K01708	0	0	0	0	1	0	0	0	0	0	0	0	0	0	0	0	0	0	0	0	0	0	0	0	0	0	0	0	0	0	0	0	0	0	0	0	0	0	0	0	0	0	0	0	0	0	0	0
rfbG; CDP-glucose 4,6-dehydratase [EC:4.2.1.45]	K01709	2	0	0	0	2	0	1	0	0	0	0	0	0	0	0	1	0	0	0	0	0	0	0	0	0	0	2	1	0	0	1	0	0	0	0	0	1	0	0	0	0	0	1	0	0	0	2	0
E4.2.1.46, rfbB, rffG; dTDP-glucose 4,6-dehydratase [EC:4.2.1.46]	K01710	7	1	1	1	1	1	4	1	2	2	1	0	1	0	0	3	1	0	0	1	0	2	3	1	1	1	2	1	1	1	3	1	2	2	1	1	1	1	1	3	0	2	2	2	4	2	2	0
gmd, GMDS; GDPmannose 4,6-dehydratase [EC:4.2.1.47]	K01711	7	1	1	2	2	2	1	2	1	0	1	1	0	1	0	3	0	0	1	2	0	1	2	0	0	0	1	0	0	0	3	0	1	0	1	1	1	0	0	4	0	1	0	2	2	1	2	1
hutU, UROC1; urocanate hydratase [EC:4.2.1.49]	K01712	5	0	0	2	0	1	1	2	0	2	0	1	0	1	0	0	0	1	2	0	0	0	0	0	0	0	0	1	1	1	0	1	0	0	1	0	0	1	1	1	0	1	0	1	0	0	0	0
pheC; cyclohexadienyl dehydratase [EC:4.2.1.51 4.2.1.91]	K01713	0	0	0	0	0	0	0	0	0	0	0	0	0	0	0	0	0	0	0	0	0	0	0	0	0	0	0	0	0	0	0	0	0	0	0	0	0	0	0	0	0	0	0	0	0	0	0	0
dapA; 4-hydroxy-tetrahydrodipicolinate synthase [EC:4.3.3.7]	K01714	3	2	5	1	8	2	1	0	4	1	3	1	1	0	1	2	2	0	2	3	1	3	2	3	0	3	2	0	0	0	3	1	2	1	0	1	6	0	2	1	0	1	1	1	2	1	4	1
crt; enoyl-CoA hydratase [EC:4.2.1.17]	K01715	5	2	0	1	0	0	0	3	1	1	0	1	0	2	5	1	0	1	2	0	0	0	0	0	0	0	0	2	1	1	15	1	11	7	0	0	0	1	0	0	6	1	2	13	0	0	0	5
fabA; 3-hydroxyacyl-[acyl-carrier protein] dehydratase / trans-2-decenoyl-[acyl-carrier protein] isomerase [EC:4.2.1.59 5.3.3.14]	K01716	0	0	0	0	0	0	0	0	0	1	0	0	0	0	0	0	0	0	0	0	0	0	0	0	0	0	0	0	0	1	0	0	0	0	0	0	0	0	0	0	0	0	0	0	0	0	0	0
hemD, UROS; uroporphyrinogen-III synthase [EC:4.2.1.75]	K01719	6	1	1	0	0	1	0	1	1	2	0	0	1	0	0	0	0	0	0	0	0	0	0	0	0	0	0	0	0	0	0	1	0	0	0	0	0	2	0	1	0	1	0	0	0	0	0	0
prpD; 2-methylcitrate dehydratase [EC:4.2.1.79]	K01720	0	0	0	0	1	1	0	0	1	0	0	1	0	0	0	0	0	0	0	0	0	0	0	0	0	0	0	0	1	1	0	0	0	0	0	0	0	0	0	0	0	0	0	0	0	0	0	0
nthA; nitrile hydratase subunit alpha [EC:4.2.1.84]	K01721	0	0	0	0	0	0	0	0	0	0	0	0	0	0	0	0	0	0	0	0	0	0	0	0	0	0	0	0	0	0	0	0	0	0	0	0	0	0	0	0	0	0	0	0	0	0	0	0
PCBD, phhB; 4a-hydroxytetrahydrobiopterin dehydratase [EC:4.2.1.96]	K01724	2	1	1	1	1	1	1	1	1	1	1	0	1	0	0	0	0	0	0	0	0	0	1	0	1	0	0	0	0	0	0	0	0	0	0	0	0	0	1	1	0	0	0	0	0	0	0	0
cynS; cyanate lyase [EC:4.2.1.104]	K01725	0	0	0	0	0	0	0	0	0	0	0	0	1	2	0	0	0	0	0	0	0	0	0	0	0	0	0	0	0	0	0	0	0	0	0	0	0	0	0	0	0	0	0	0	0	0	0	0
hysA, hylA, hylB; hyaluronate lyase [EC:4.2.2.1]	K01727	0	0	0	0	0	0	0	0	0	0	0	0	0	0	0	0	0	0	0	0	0	0	0	0	0	0	0	0	0	0	0	0	0	1	0	0	0	0	0	0	0	0	0	0	0	0	0	0
pel; pectate lyase [EC:4.2.2.2]	K01728	1	1	0	0	0	0	0	0	0	0	0	0	0	0	0	0	0	0	0	0	0	1	1	0	0	0	0	0	0	0	0	0	0	0	0	1	0	0	0	1	0	0	0	0	0	0	0	0
algL; poly(beta-D-mannuronate) lyase [EC:4.2.2.3]	K01729	0	2	0	0	0	0	0	0	0	0	0	0	0	0	0	0	0	0	0	0	0	0	0	0	0	1	0	0	0	0	0	0	0	0	0	0	0	0	0	0	0	0	0	0	0	0	0	0
ogl; oligogalacturonide lyase [EC:4.2.2.6]	K01730	0	1	0	0	0	0	0	0	0	0	0	0	0	0	0	0	0	0	0	0	0	0	0	0	0	0	0	0	0	0	0	0	0	0	0	0	0	0	0	0	0	0	0	0	0	0	0	0
thrC; threonine synthase [EC:4.2.3.1]	K01733	4	0	3	1	0	1	2	1	3	2	1	1	2	0	1	1	1	1	1	1	1	1	0	3	1	1	1	1	2	1	1	1	1	1	1	0	2	2	1	1	1	2	2	1	0	1	1	1
mgsA; methylglyoxal synthase [EC:4.2.3.3]	K01734	0	0	0	0	0	0	0	0	0	0	0	0	0	0	0	0	0	0	0	0	0	0	0	0	0	0	0	0	0	0	0	0	0	0	0	0	0	1	0	0	0	0	0	0	0	0	0	0
aroB; 3-dehydroquinate synthase [EC:4.2.3.4]	K01735	3	2	1	0	2	1	1	1	2	1	1	1	1	0	0	1	0	0	1	1	0	1	1	2	0	0	1	0	1	0	1	1	1	0	1	1	2	1	1	1	1	1	1	2	1	1	1	0
aroC; chorismate synthase [EC:4.2.3.5]	K01736	4	1	1	1	1	1	1	2	1	2	0	1	1	0	0	1	0	1	0	1	0	0	1	0	0	0	1	0	1	0	1	1	1	1	1	1	1	1	1	1	1	1	1	1	0	1	1	0
queD, ptpS, PTS; 6-pyruvoyltetrahydropterin/6-carboxytetrahydropterin synthase [EC:4.2.3.12 4.1.2.50]	K01737	7	1	1	1	2	2	2	1	2	1	0	0	2	1	0	1	0	1	1	0	1	2	1	2	0	1	2	1	1	1	1	2	1	1	0	0	0	2	0	1	1	1	0	1	1	1	0	2
cysK; cysteine synthase [EC:2.5.1.47]	K01738	1	2	2	2	1	2	1	3	1	1	0	1	3	1	1	1	2	2	1	0	0	2	1	3	1	2	3	0	0	1	1	0	1	1	1	4	2	3	1	2	2	2	2	1	1	1	2	0
metB; cystathionine gamma-synthase [EC:2.5.1.48]	K01739	0	2	0	0	1	1	0	1	1	0	0	0	0	0	0	0	0	0	0	0	0	1	0	0	0	0	1	0	0	0	0	0	0	0	0	0	0	1	2	0	0	0	0	0	1	0	0	0
metY; O-acetylhomoserine (thiol)-lyase [EC:2.5.1.49]	K01740	3	1	0	1	0	2	0	0	1	0	2	1	0	1	1	1	1	3	1	1	0	0	1	1	1	0	0	1	1	1	1	0	2	0	0	2	1	2	1	4	0	4	1	1	0	1	2	0
aspA; aspartate ammonia-lyase [EC:4.3.1.1]	K01744	0	0	0	0	0	0	0	0	0	0	0	0	0	0	0	0	0	0	0	0	0	0	0	0	0	0	0	0	0	0	0	0	0	0	0	0	0	0	1	2	0	0	0	0	1	0	1	1
hutH, HAL; histidine ammonia-lyase [EC:4.3.1.3]	K01745	5	0	0	1	0	1	1	1	0	1	1	1	0	0	0	0	0	1	1	0	0	0	0	0	0	0	0	2	1	1	0	3	0	0	1	0	0	1	2	2	0	2	0	1	0	0	0	0
E4.3.1.4; formiminotetrahydrofolate cyclodeaminase [EC:4.3.1.4]	K01746	0	0	0	0	0	0	0	0	0	0	0	1	0	0	0	0	0	0	0	0	0	0	0	0	0	0	0	0	0	0	0	0	0	0	0	0	0	0	0	0	0	0	0	0	0	0	0	0
hemC, HMBS; hydroxymethylbilane synthase [EC:2.5.1.61]	K01749	5	1	1	1	1	1	1	2	1	3	0	1	1	1	1	1	0	1	1	1	1	0	1	0	0	0	0	0	1	0	1	0	1	1	0	1	0	1	0	0	1	0	0	1	1	1	1	0
E4.3.1.12, ocd; ornithine cyclodeaminase [EC:4.3.1.12]	K01750	0	0	1	0	0	0	0	4	1	0	0	2	0	1	0	0	2	0	4	0	0	1	1	1	0	0	0	2	0	0	1	1	0	0	2	0	0	1	0	0	0	2	0	2	1	0	1	0
E4.3.1.15; diaminopropionate ammonia-lyase [EC:4.3.1.15]	K01751	0	0	0	0	0	0	0	0	0	0	0	0	0	0	0	0	0	0	1	0	0	0	0	0	0	0	0	0	0	0	0	0	0	0	0	0	0	0	0	0	0	0	1	0	0	0	0	0
E4.3.1.17, sdaA, sdaB, tdcG; L-serine dehydratase [EC:4.3.1.17]	K01752	4	1	0	0	1	0	0	0	0	0	0	1	0	0	0	0	0	0	0	0	0	0	2	0	0	0	0	0	1	0	0	0	0	0	0	0	0	1	0	0	0	2	1	0	0	0	1	0
dsdA; D-serine dehydratase [EC:4.3.1.18]	K01753	0	0	0	0	0	0	0	0	0	0	0	0	0	0	0	0	0	0	0	0	0	0	0	0	0	0	0	0	0	0	0	0	0	0	0	0	0	0	0	0	0	0	0	0	0	0	0	0
E4.3.1.19, ilvA, tdcB; threonine dehydratase [EC:4.3.1.19]	K01754	1	1	1	2	1	2	0	6	3	1	0	0	1	1	1	0	0	0	0	1	0	0	0	0	0	0	0	3	0	2	3	1	4	0	1	0	0	1	1	2	0	2	0	1	0	0	1	0
argH, ASL; argininosuccinate lyase [EC:4.3.2.1]	K01755	4	2	1	1	1	1	1	1	2	1	1	1	1	2	2	1	0	1	1	0	0	1	3	1	1	3	0	0	1	0	2	0	1	1	0	0	1	1	1	1	1	0	1	0	0	1	1	0
purB, ADSL; adenylosuccinate lyase [EC:4.3.2.2]	K01756	3	1	1	1	1	1	1	1	1	2	0	1	1	1	0	1	1	0	1	1	1	2	0	1	1	1	1	1	1	1	1	1	1	1	1	1	1	1	1	1	1	2	1	1	1	1	1	0
STR1; strictosidine synthase [EC:4.3.3.2]	K01757	0	0	0	0	0	0	0	0	0	0	0	0	0	0	0	0	0	0	0	0	0	0	0	0	0	0	0	0	0	0	0	0	0	0	0	0	0	0	0	0	0	0	0	0	0	0	0	0
CTH; cystathionine gamma-lyase [EC:4.4.1.1]	K01758	0	0	0	1	1	0	0	2	1	1	0	0	0	0	0	0	0	0	0	0	0	1	0	0	0	0	0	0	0	0	0	0	0	0	0	0	0	0	0	0	1	0	0	0	2	0	0	0
GLO1, gloA; lactoylglutathione lyase [EC:4.4.1.5]	K01759	0	3	0	0	0	0	2	0	0	1	0	0	1	0	0	1	0	0	0	0	0	0	0	1	1	0	0	0	0	0	2	0	1	1	0	0	1	0	0	1	0	1	0	3	1	0	0	1
metC; cysteine-S-conjugate beta-lyase [EC:4.4.1.13]	K01760	5	0	0	0	0	0	0	1	0	0	0	0	0	1	0	0	0	0	1	0	0	0	0	0	0	0	0	0	0	0	0	0	0	0	0	0	0	0	0	1	1	0	0	0	0	0	0	0
E4.4.1.11; methionine-gamma-lyase [EC:4.4.1.11]	K01761	2	0	0	2	1	0	0	2	0	1	0	0	0	1	0	0	0	1	1	0	0	1	0	2	0	0	0	0	1	1	0	1	1	0	0	0	1	3	0	0	0	2	0	0	2	0	0	0
ACS; 1-aminocyclopropane-1-carboxylate synthase [EC:4.4.1.14]	K01762	0	0	0	0	0	0	0	1	0	0	0	0	0	0	0	0	0	0	0	0	0	0	0	0	0	0	0	0	0	0	0	0	0	0	0	0	0	0	0	0	0	0	0	0	0	0	0	0
HCCS; cytochrome c heme-lyase [EC:4.4.1.17]	K01764	0	0	0	0	0	0	0	0	0	0	0	0	0	0	0	0	0	0	0	0	0	0	0	0	0	0	0	0	0	0	0	0	0	0	0	0	0	0	0	0	0	0	0	0	0	0	0	0
E4.6.1.1; adenylate cyclase [EC:4.6.1.1]	K01768	5	2	1	2	4	3	2	4	7	1	0	6	0	3	5	1	0	1	4	1	2	2	0	3	2	1	4	1	2	4	15	1	7	1	1	0	2	0	0	8	1	4	2	6	4	0	0	2
E4.6.1.2; guanylate cyclase, other [EC:4.6.1.2]	K01769	0	0	0	0	0	0	0	0	0	0	0	0	0	0	0	0	0	0	0	0	0	0	0	0	0	0	0	0	0	0	0	0	0	0	0	0	0	0	0	0	0	0	0	0	0	0	0	0
ispF; 2-C-methyl-D-erythritol 2,4-cyclodiphosphate synthase [EC:4.6.1.12]	K01770	0	0	1	0	1	1	1	1	1	0	0	0	1	1	0	0	0	0	0	0	0	1	0	1	0	0	1	1	1	1	1	1	1	1	0	0	1	0	1	1	0	2	0	1	1	1	0	1
plc; 1-phosphatidylinositol phosphodiesterase [EC:4.6.1.13]	K01771	0	0	0	0	0	0	0	0	0	0	0	0	0	0	0	0	0	0	0	0	0	0	0	0	0	0	0	0	0	0	0	0	0	0	0	0	0	0	0	0	0	0	0	0	0	0	0	0
hemH, FECH; protoporphyrin/coproporphyrin ferrochelatase [EC:4.99.1.1 4.99.1.9]	K01772	4	1	1	1	1	1	1	1	1	0	0	0	3	1	0	1	0	0	1	1	0	1	1	1	0	0	1	0	1	0	0	0	0	0	0	0	0	1	0	1	0	0	0	0	0	0	0	0
alr; alanine racemase [EC:5.1.1.1]	K01775	7	0	0	1	0	1	1	2	0	1	0	1	1	1	1	1	0	2	0	1	1	0	0	1	1	0	0	2	1	0	2	2	2	0	0	0	1	1	1	1	0	3	1	1	1	2	0	0
prdF; proline racemase [EC:5.1.1.4]	K01777	0	0	0	0	1	0	0	0	0	0	0	0	0	0	0	0	0	0	0	0	0	0	0	0	0	0	0	0	0	0	3	0	0	0	0	0	0	0	1	0	0	0	0	0	0	0	0	0
dapF; diaminopimelate epimerase [EC:5.1.1.7]	K01778	3	0	1	1	1	1	1	1	2	1	2	2	0	0	1	1	0	0	1	0	1	1	0	0	1	2	0	1	1	1	1	1	0	0	0	1	0	1	1	1	1	1	1	1	1	1	1	0
racD; aspartate racemase [EC:5.1.1.13]	K01779	0	0	0	0	0	0	0	0	0	0	0	1	0	0	0	1	0	0	0	0	0	0	1	1	0	1	1	2	0	1	1	0	0	0	2	0	0	1	0	2	0	0	2	1	2	0	0	0
mdlA; mandelate racemase [EC:5.1.2.2]	K01781	0	0	0	0	0	0	0	0	0	0	0	0	0	0	0	0	0	0	0	0	0	0	0	0	0	0	0	0	0	0	0	0	0	0	0	0	0	0	0	0	0	0	0	0	0	0	0	0
fadJ; 3-hydroxyacyl-CoA dehydrogenase / enoyl-CoA hydratase / 3-hydroxybutyryl-CoA epimerase [EC:1.1.1.35 4.2.1.17 5.1.2.3]	K01782	0	0	0	0	0	1	0	2	2	0	0	0	0	0	1	0	0	0	0	0	0	0	1	0	0	0	3	0	0	0	0	0	0	0	0	0	0	0	0	0	0	0	0	0	0	0	0	0
rpe, RPE; ribulose-phosphate 3-epimerase [EC:5.1.3.1]	K01783	1	0	1	1	1	1	1	2	1	1	1	1	1	1	1	1	1	0	1	2	1	2	1	1	0	1	2	1	1	1	1	1	1	1	0	1	1	0	1	0	0	1	0	1	1	1	1	0
galE, GALE; UDP-glucose 4-epimerase [EC:5.1.3.2]	K01784	8	1	2	4	6	3	4	4	2	10	1	2	1	2	1	10	3	1	1	2	1	1	3	5	0	8	8	5	1	2	6	1	2	5	1	2	3	1	1	3	2	7	1	5	7	2	6	0
galM, GALM; aldose 1-epimerase [EC:5.1.3.3]	K01785	9	0	2	0	1	1	0	0	2	0	0	1	0	0	0	0	0	0	0	0	0	2	1	1	0	1	4	0	0	0	0	1	0	0	0	2	1	1	1	3	0	1	0	0	0	0	3	0
RENBP; N-acylglucosamine 2-epimerase [EC:5.1.3.8]	K01787	0	0	0	0	0	2	0	0	0	0	0	0	0	0	0	0	1	0	0	1	0	1	1	3	0	1	1	0	0	0	0	0	0	0	0	1	2	0	0	0	0	1	0	0	0	0	1	0
nanE; N-acylglucosamine-6-phosphate 2-epimerase [EC:5.1.3.9]	K01788	0	0	0	0	0	0	0	0	0	0	0	0	1	0	0	0	0	0	0	0	0	0	0	0	0	0	0	0	0	0	0	0	0	0	0	0	0	0	0	0	0	0	0	0	0	0	0	0
rfbC, rmlC; dTDP-4-dehydrorhamnose 3,5-epimerase [EC:5.1.3.13]	K01790	7	0	1	0	2	0	4	1	2	0	0	0	1	1	0	1	1	0	0	0	2	1	1	1	0	1	1	2	1	1	2	0	1	1	0	0	1	1	0	1	0	1	3	2	1	0	5	0
wecB; UDP-N-acetylglucosamine 2-epimerase (non-hydrolysing) [EC:5.1.3.14]	K01791	9	0	0	0	0	1	1	2	1	2	1	0	2	0	1	2	1	1	1	0	0	3	3	0	0	0	2	1	2	1	2	1	0	3	0	0	2	1	0	3	0	4	0	2	0	1	1	0
E5.1.3.15; glucose-6-phosphate 1-epimerase [EC:5.1.3.15]	K01792	0	0	0	0	1	0	0	0	0	0	0	0	0	0	0	0	0	0	0	0	0	0	0	0	0	0	0	0	0	0	0	0	0	1	0	0	0	0	0	0	0	0	0	0	0	0	0	0
E5.1.99.4, AMACR, mcr; alpha-methylacyl-CoA racemase [EC:5.1.99.4]	K01796	0	0	0	0	0	0	0	0	0	0	0	0	0	0	1	0	0	0	0	0	0	0	0	0	0	0	0	0	0	0	1	0	1	0	0	0	0	0	0	0	0	0	0	1	0	0	0	0
nicE, maiA; maleate isomerase [EC:5.2.1.1]	K01799	1	0	0	0	0	0	0	0	0	0	0	0	0	0	0	0	0	0	1	0	0	0	0	0	0	0	0	0	0	0	0	0	0	0	0	0	0	0	0	0	0	0	1	0	0	0	0	0
maiA, GSTZ1; maleylacetoacetate isomerase [EC:5.2.1.2]	K01800	0	0	0	1	0	0	0	0	0	0	0	0	0	0	0	0	0	0	0	0	0	0	0	0	0	0	0	0	0	0	0	0	0	0	0	0	0	0	0	0	0	0	0	0	0	0	0	0
nagL; maleylpyruvate isomerase [EC:5.2.1.4]	K01801	0	0	0	1	0	0	0	0	0	0	0	0	0	0	0	0	0	0	0	0	0	0	0	0	0	0	0	0	0	0	0	0	0	0	0	0	0	0	0	0	0	0	0	0	0	0	0	0
E5.2.1.8; peptidylprolyl isomerase [EC:5.2.1.8]	K01802	3	2	1	0	2	3	1	4	0	2	1	1	2	2	0	2	0	0	0	0	0	1	1	1	0	0	0	0	2	1	1	1	0	1	0	0	1	0	2	0	1	0	0	0	0	2	4	0
TPI, tpiA; triosephosphate isomerase (TIM) [EC:5.3.1.1]	K01803	3	0	1	1	1	1	1	1	1	0	1	0	1	0	0	1	0	1	1	0	1	1	1	1	0	0	2	1	1	0	0	1	1	1	1	0	2	1	1	2	1	1	0	1	2	2	1	1
araA; L-arabinose isomerase [EC:5.3.1.4]	K01804	3	0	0	0	0	1	0	0	0	0	0	0	0	0	0	0	0	0	0	0	0	0	2	1	2	1	1	0	0	0	0	0	0	0	0	0	3	0	0	1	0	0	0	0	0	0	1	0
xylA; xylose isomerase [EC:5.3.1.5]	K01805	2	0	2	0	1	1	0	0	1	0	0	1	0	0	2	0	2	0	0	0	0	1	1	1	0	1	0	0	0	0	0	0	0	0	1	1	1	0	1	1	0	2	0	0	0	0	3	0
rpiA; ribose 5-phosphate isomerase A [EC:5.3.1.6]	K01807	0	0	1	0	0	0	0	1	0	0	0	0	1	0	0	0	0	0	0	0	0	0	0	1	0	0	0	0	0	0	1	0	0	0	0	0	0	0	0	0	0	0	0	0	0	0	0	0
rpiB; ribose 5-phosphate isomerase B [EC:5.3.1.6]	K01808	3	0	0	0	1	1	1	2	2	2	0	0	0	1	1	1	0	1	0	1	1	2	0	0	0	0	2	1	1	2	1	1	1	2	1	1	5	1	2	2	1	2	1	2	0	1	2	1
manA, MPI; mannose-6-phosphate isomerase [EC:5.3.1.8]	K01809	3	2	1	1	1	1	0	0	1	1	0	0	0	1	0	0	0	0	1	1	1	1	1	1	1	1	0	1	1	0	1	1	1	0	1	1	1	1	2	1	0	1	1	2	1	0	2	0
GPI, pgi; glucose-6-phosphate isomerase [EC:5.3.1.9]	K01810	3	1	1	2	2	1	1	0	1	2	2	0	0	0	0	1	0	0	0	1	1	1	1	2	1	1	0	0	1	0	0	1	1	1	0	2	1	1	1	0	0	1	0	2	0	0	1	0
xylS, yicI; alpha-D-xyloside xylohydrolase [EC:3.2.1.177]	K01811	1	0	0	0	0	0	0	0	0	0	1	0	0	0	0	0	0	0	0	0	0	0	0	0	1	0	0	0	0	0	0	0	0	0	0	0	0	2	0	2	0	3	0	0	0	0	2	0
uxaC; glucuronate isomerase [EC:5.3.1.12]	K01812	5	0	1	0	0	1	0	0	2	0	0	1	0	0	0	0	0	0	0	0	0	1	0	0	2	2	1	0	0	0	0	0	0	0	1	1	1	1	0	1	0	0	0	0	0	0	1	0
rhaA; L-rhamnose isomerase [EC:5.3.1.14]	K01813	0	0	0	0	1	0	0	0	0	0	0	0	0	0	0	0	0	0	0	0	0	1	1	2	1	0	2	0	0	0	1	0	0	0	0	1	1	0	0	1	0	0	0	1	0	0	1	0
hisA; phosphoribosylformimino-5-aminoimidazole carboxamide ribotide isomerase [EC:5.3.1.16]	K01814	4	2	2	1	1	1	1	0	2	1	0	1	1	1	1	0	0	0	0	1	1	1	2	1	1	1	1	0	1	0	1	0	1	1	0	0	1	1	0	1	1	0	1	1	1	1	1	1
kduI; 4-deoxy-L-threo-5-hexosulose-uronate ketol-isomerase [EC:5.3.1.17]	K01815	3	2	0	0	0	0	0	0	0	0	0	0	0	0	0	0	0	0	0	0	0	0	0	0	0	0	0	0	0	0	0	0	0	0	0	0	0	1	0	2	0	0	0	0	0	0	1	0
hyi, gip; hydroxypyruvate isomerase [EC:5.3.1.22]	K01816	2	2	1	0	2	0	0	1	3	0	0	0	0	0	0	0	0	0	0	1	0	3	4	1	0	1	3	1	0	0	0	0	0	0	0	3	0	0	0	1	0	0	0	0	0	0	5	0
trpF; phosphoribosylanthranilate isomerase [EC:5.3.1.24]	K01817	4	0	1	0	1	1	1	2	1	0	2	0	1	1	0	2	0	0	0	0	1	1	2	0	0	1	1	0	0	1	3	0	2	1	0	1	0	1	1	1	1	2	1	0	1	1	1	0
fucI; L-fucose/D-arabinose isomerase [EC:5.3.1.25 5.3.1.3]	K01818	0	0	0	0	0	0	0	0	0	0	0	0	0	0	0	0	0	0	0	0	0	0	0	0	1	1	0	1	0	0	1	0	0	0	0	1	2	0	0	1	0	2	0	1	1	0	1	0
rhaA; L-rhamnose isomerase / sugar isomerase [EC:5.3.1.14 5.3.1.-]	K01820	1	1	0	0	0	1	0	0	0	0	0	0	0	0	0	0	0	0	0	0	0	0	0	0	0	0	0	0	0	0	0	0	0	0	0	0	0	0	0	0	0	0	0	0	0	0	0	0
praC, xylH; 4-oxalocrotonate tautomerase [EC:5.3.2.6]	K01821	0	0	0	0	0	0	1	0	0	0	0	0	0	0	0	2	0	0	0	0	0	0	0	0	0	0	0	1	0	0	0	0	1	0	0	0	0	0	0	0	1	0	0	0	0	0	0	0
E5.3.3.1; steroid Delta-isomerase [EC:5.3.3.1]	K01822	0	0	0	0	0	0	0	0	0	0	0	0	0	0	0	0	0	0	0	0	0	0	0	0	0	0	0	0	0	0	1	0	0	1	0	0	0	0	0	0	0	0	0	0	0	0	0	0
idi, IDI; isopentenyl-diphosphate Delta-isomerase [EC:5.3.3.2]	K01823	4	0	0	1	0	0	0	0	0	0	0	0	0	0	0	0	0	0	0	0	0	0	0	0	0	0	0	0	1	0	0	1	0	0	0	0	0	0	0	1	0	1	0	0	0	0	1	0
EBP; cholestenol Delta-isomerase [EC:5.3.3.5]	K01824	0	0	0	0	0	0	0	0	0	0	0	0	0	0	0	0	0	0	0	0	0	0	0	0	0	0	0	0	0	0	0	0	0	0	0	0	0	0	0	0	0	0	0	0	0	0	0	0
fadB; 3-hydroxyacyl-CoA dehydrogenase / enoyl-CoA hydratase / 3-hydroxybutyryl-CoA epimerase / enoyl-CoA isomerase [EC:1.1.1.35 4.2.1.17 5.1.2.3 5.3.3.8]	K01825	0	0	0	0	0	0	0	0	1	0	0	0	0	0	0	0	0	0	0	0	0	0	1	0	0	0	2	0	0	0	0	0	0	0	0	0	0	0	0	0	0	0	0	0	0	0	0	0
hpaF, hpcD; 5-carboxymethyl-2-hydroxymuconate isomerase [EC:5.3.3.10]	K01826	0	0	0	0	0	0	0	0	0	0	0	0	0	0	0	0	0	2	0	0	0	0	0	0	0	0	0	0	0	0	0	0	0	0	0	0	0	0	0	0	0	0	0	0	0	0	0	0
E5.3.4.1; protein disulfide-isomerase [EC:5.3.4.1]	K01829	3	0	0	0	0	0	0	0	0	0	0	0	0	0	0	0	0	0	0	0	0	0	1	0	0	0	1	0	0	0	0	0	0	0	0	0	0	0	0	0	0	0	0	0	0	0	0	0
TBXAS1, CYP5A; thromboxane-A synthase [EC:5.3.99.5]	K01832	0	0	0	0	0	1	0	0	0	0	0	0	0	0	0	0	0	0	0	0	0	0	0	0	0	0	0	0	0	0	0	0	0	0	0	0	0	0	0	0	0	0	0	0	0	0	0	0
PGAM, gpmA; 2,3-bisphosphoglycerate-dependent phosphoglycerate mutase [EC:5.4.2.11]	K01834	0	0	0	1	1	0	1	0	0	0	0	0	0	0	0	0	0	0	1	0	0	0	0	0	0	0	0	0	0	0	1	1	2	0	0	0	0	0	1	0	0	1	0	0	0	2	0	0
pgm; phosphoglucomutase [EC:5.4.2.2]	K01835	1	1	1	0	1	2	0	0	1	1	2	0	0	1	1	0	0	0	0	0	0	1	0	1	0	0	0	1	0	0	0	1	0	0	0	0	1	1	0	1	0	1	0	0	0	0	0	0
PGM3; phosphoacetylglucosamine mutase [EC:5.4.2.3]	K01836	0	0	0	0	0	0	0	1	0	0	0	0	0	0	0	0	0	0	0	0	0	0	0	0	0	0	0	0	0	0	0	0	0	0	0	0	0	0	0	0	0	0	0	0	0	0	0	0
pgmB; beta-phosphoglucomutase [EC:5.4.2.6]	K01838	3	1	0	0	0	1	1	0	0	0	1	0	0	0	0	0	0	0	0	0	0	2	0	1	0	0	0	0	0	0	1	0	0	0	0	0	1	0	0	0	0	0	0	0	0	0	1	0
deoB; phosphopentomutase [EC:5.4.2.7]	K01839	0	0	0	1	0	0	0	0	0	0	0	0	0	0	0	1	0	0	0	0	0	0	0	0	0	0	0	0	0	0	0	0	0	0	0	0	1	0	0	0	0	0	0	0	1	0	0	0
manB; phosphomannomutase [EC:5.4.2.8]	K01840	4	0	2	0	2	2	0	1	2	2	3	0	0	0	0	2	1	0	0	0	0	2	5	1	1	0	2	0	1	1	2	1	0	0	0	2	1	1	2	1	0	1	0	0	0	0	2	0
pepM; phosphoenolpyruvate phosphomutase [EC:5.4.2.9]	K01841	0	0	0	0	0	0	1	0	0	0	0	0	0	0	0	0	1	0	0	0	0	1	0	0	0	0	0	0	0	2	0	0	0	1	0	0	0	0	0	0	0	0	0	0	0	0	0	0
kamA; lysine 2,3-aminomutase [EC:5.4.3.2]	K01843	0	1	1	2	0	1	1	0	0	0	0	0	0	1	0	1	0	2	2	0	0	0	0	1	2	1	0	0	1	0	0	0	1	0	0	0	2	0	0	1	0	3	1	2	0	0	1	0
kamD; beta-lysine 5,6-aminomutase alpha subunit [EC:5.4.3.3]	K01844	0	0	0	1	0	0	0	0	0	0	0	0	0	0	0	0	0	0	0	0	0	0	0	0	0	0	0	0	0	0	0	0	0	0	0	0	0	0	0	0	0	0	0	1	0	0	0	0
hemL; glutamate-1-semialdehyde 2,1-aminomutase [EC:5.4.3.8]	K01845	3	3	1	1	4	7	1	2	3	5	1	2	1	3	0	5	4	1	2	3	1	1	3	7	1	0	4	1	1	1	5	0	1	3	0	0	5	1	0	0	1	1	0	7	2	1	4	0
glmS, mutS, mamA; methylaspartate mutase sigma subunit [EC:5.4.99.1]	K01846	0	0	0	0	0	0	0	0	0	0	0	1	0	0	1	0	0	0	0	0	0	0	0	0	0	0	0	0	0	0	0	0	0	0	0	0	0	0	0	0	0	0	0	0	0	0	0	0
MUT; methylmalonyl-CoA mutase [EC:5.4.99.2]	K01847	9	0	0	3	0	0	0	0	0	1	0	1	0	0	0	0	0	0	1	0	1	0	0	0	0	0	0	0	0	0	0	2	0	0	0	0	2	0	0	4	0	2	0	1	0	0	0	0
E5.4.99.2A, mcmA1; methylmalonyl-CoA mutase, N-terminal domain [EC:5.4.99.2]	K01848	0	0	0	0	0	0	0	2	0	1	0	2	0	1	7	1	0	1	7	0	0	0	0	0	0	0	0	3	2	2	9	0	14	2	0	0	0	0	2	0	6	0	0	4	7	0	0	1
E5.4.99.2B, mcmA2; methylmalonyl-CoA mutase, C-terminal domain [EC:5.4.99.2]	K01849	0	0	0	0	0	0	0	1	0	1	0	1	0	1	8	1	0	1	5	0	0	0	0	0	0	0	0	2	1	1	5	0	8	1	2	0	0	0	1	0	5	0	0	0	2	0	0	2
E5.4.99.5; chorismate mutase [EC:5.4.99.5]	K01850	0	0	0	0	0	0	0	0	0	0	0	0	0	0	0	0	0	0	0	0	0	0	0	0	0	0	0	0	0	0	0	0	0	0	0	0	0	0	0	0	0	0	0	0	0	0	0	0
pchA; salicylate biosynthesis isochorismate synthase [EC:5.4.4.2]	K01851	0	0	0	0	0	0	0	0	0	0	0	0	0	0	0	0	0	0	0	0	0	0	0	0	0	0	0	0	0	0	0	0	0	0	0	0	0	0	0	0	0	0	0	0	0	0	0	0
LSS, ERG7; lanosterol synthase [EC:5.4.99.7]	K01852	0	0	0	0	0	0	0	0	0	0	0	0	0	0	0	0	0	0	0	0	0	0	0	0	0	0	0	0	0	0	0	0	0	0	0	0	0	0	0	0	0	0	0	0	0	0	0	0
glf; UDP-galactopyranose mutase [EC:5.4.99.9]	K01854	1	0	0	0	0	0	0	0	0	0	0	0	0	0	0	0	0	0	0	0	0	0	0	0	0	0	0	0	1	0	0	0	0	0	0	0	0	0	0	0	0	1	0	0	0	1	2	0
catB; muconate cycloisomerase [EC:5.5.1.1]	K01856	0	0	1	0	1	1	0	0	2	0	0	1	0	1	0	0	1	0	1	0	0	1	4	1	0	1	2	0	0	0	2	0	0	0	0	0	0	0	0	0	1	0	0	0	2	0	0	0
pcaB; 3-carboxy-cis,cis-muconate cycloisomerase [EC:5.5.1.2]	K01857	0	0	0	0	0	0	0	0	0	0	0	0	0	0	0	0	0	0	0	0	0	0	0	0	0	0	0	0	0	0	0	0	0	0	0	0	0	0	0	0	0	0	0	0	0	0	0	0
INO1, ISYNA1; myo-inositol-1-phosphate synthase [EC:5.5.1.4]	K01858	0	0	1	0	0	0	1	1	0	0	0	0	0	2	0	1	0	0	2	0	0	2	0	0	0	0	3	1	2	0	3	0	0	1	0	0	1	0	1	0	1	0	3	1	0	0	0	2
E5.5.1.7; chloromuconate cycloisomerase [EC:5.5.1.7]	K01860	0	0	0	0	0	1	0	0	0	0	0	0	0	0	0	0	0	0	0	0	0	0	0	0	0	0	0	0	0	0	0	0	0	0	0	0	0	0	0	0	0	0	0	0	0	0	0	0
hab; (hydroxyamino)benzene mutase [EC:5.4.4.1]	K01865	0	0	0	0	0	0	0	0	0	0	0	0	0	0	0	0	0	0	0	0	0	0	0	0	0	0	0	0	0	0	0	0	0	0	0	0	0	0	0	0	0	0	0	0	1	0	0	0
YARS, tyrS; tyrosyl-tRNA synthetase [EC:6.1.1.1]	K01866	3	1	1	1	1	1	1	1	1	2	0	0	1	1	1	1	0	0	1	1	1	1	1	1	0	2	0	2	1	1	2	1	1	1	0	0	1	1	1	1	1	1	1	1	0	3	1	0
WARS, trpS; tryptophanyl-tRNA synthetase [EC:6.1.1.2]	K01867	5	1	1	1	1	1	1	1	1	1	1	1	0	1	0	1	0	0	1	0	1	1	1	0	0	0	1	1	1	1	1	1	1	1	1	0	1	1	1	1	2	1	1	1	1	1	1	1
TARS, thrS; threonyl-tRNA synthetase [EC:6.1.1.3]	K01868	1	1	1	1	2	1	1	2	2	2	0	0	0	2	1	1	0	0	1	1	1	1	1	1	1	1	1	1	1	0	1	1	1	1	0	0	1	1	1	1	1	2	1	2	2	2	1	1
LARS, leuS; leucyl-tRNA synthetase [EC:6.1.1.4]	K01869	1	1	2	1	2	1	1	1	3	2	0	0	0	1	1	1	0	0	0	1	1	1	0	1	0	1	2	1	0	0	3	1	3	2	0	0	1	0	1	3	0	3	1	1	1	1	1	0
IARS, ileS; isoleucyl-tRNA synthetase [EC:6.1.1.5]	K01870	5	1	1	2	2	2	1	1	0	2	0	0	1	1	1	2	1	0	1	2	1	1	0	2	1	0	2	1	1	1	1	1	2	1	1	2	1	1	1	2	1	1	1	1	1	1	2	0
AARS, alaS; alanyl-tRNA synthetase [EC:6.1.1.7]	K01872	7	1	1	1	1	2	1	1	1	0	1	0	2	1	0	1	2	0	1	1	0	1	1	2	1	1	1	2	1	2	2	1	1	1	1	3	2	2	1	1	2	1	1	1	1	2	1	2
VARS, valS; valyl-tRNA synthetase [EC:6.1.1.9]	K01873	5	1	1	2	1	1	1	2	1	1	0	1	2	1	0	1	0	0	0	1	1	0	1	1	1	1	1	1	2	1	1	1	1	1	1	1	1	0	1	2	0	1	1	2	2	2	1	1
MARS, metG; methionyl-tRNA synthetase [EC:6.1.1.10]	K01874	6	1	1	1	0	1	1	1	2	2	2	1	1	1	1	1	2	2	1	1	1	1	1	1	2	1	1	1	1	1	1	1	1	1	0	1	1	2	1	2	1	2	1	2	0	2	1	1
SARS, serS; seryl-tRNA synthetase [EC:6.1.1.11]	K01875	3	1	2	0	1	1	1	1	2	1	0	2	1	0	0	1	0	0	1	1	1	1	1	1	0	0	1	1	1	1	1	1	1	1	0	0	1	1	1	0	1	2	1	1	3	1	1	0
aspS; aspartyl-tRNA synthetase [EC:6.1.1.12]	K01876	6	1	1	2	1	1	1	0	2	3	0	0	1	2	0	1	0	0	1	0	1	1	2	2	2	0	0	1	1	1	1	2	2	1	1	1	2	1	0	1	1	2	0	1	0	1	1	1
glyQ; glycyl-tRNA synthetase alpha chain [EC:6.1.1.14]	K01878	0	0	0	2	0	0	1	0	0	0	0	0	1	1	0	2	0	0	1	0	1	0	0	2	0	0	0	1	0	0	1	0	1	0	0	0	0	0	0	0	0	0	1	2	0	0	0	0
glyS; glycyl-tRNA synthetase beta chain [EC:6.1.1.14]	K01879	0	0	0	1	0	0	1	0	0	0	0	0	1	1	0	1	0	0	1	0	1	0	0	1	0	0	0	1	0	0	1	0	1	0	0	0	0	0	0	0	0	0	1	1	0	0	0	0
GARS, glyS1; glycyl-tRNA synthetase [EC:6.1.1.14]	K01880	3	1	2	0	2	2	0	1	2	0	0	0	0	0	0	0	0	0	0	1	0	0	1	0	0	0	0	0	1	1	0	1	0	1	0	2	1	0	1	1	0	0	0	1	1	1	1	0
PARS, proS; prolyl-tRNA synthetase [EC:6.1.1.15]	K01881	3	0	1	1	1	2	1	1	1	1	0	1	1	2	0	1	0	0	1	1	2	1	3	0	0	0	3	1	1	1	1	1	1	1	0	0	1	0	1	1	1	1	0	3	1	1	1	0
CARS, cysS; cysteinyl-tRNA synthetase [EC:6.1.1.16]	K01883	3	0	1	1	1	1	1	1	1	2	0	1	1	3	1	2	0	0	1	0	2	1	1	1	0	1	1	1	1	0	2	1	2	1	0	0	1	1	1	1	1	1	2	1	2	1	1	0
cysS1; cysteinyl-tRNA synthetase, unknown class [EC:6.1.1.16]	K01884	0	0	0	0	0	0	1	0	0	0	0	1	0	0	0	0	0	0	0	1	0	0	0	0	0	0	0	1	1	0	0	1	0	0	0	0	0	0	0	0	0	1	0	0	0	0	0	0
EARS, gltX; glutamyl-tRNA synthetase [EC:6.1.1.17]	K01885	3	0	3	2	2	2	1	1	1	1	0	0	2	1	0	1	1	0	1	1	1	0	1	1	0	0	0	2	1	1	1	1	1	1	1	1	2	0	0	1	1	0	1	1	1	1	1	0
QARS, glnS; glutaminyl-tRNA synthetase [EC:6.1.1.18]	K01886	3	1	0	0	1	1	1	1	1	1	0	0	0	2	1	1	0	1	1	2	1	0	1	2	0	0	3	1	2	1	1	2	1	1	2	2	1	0	0	1	0	1	0	2	0	1	1	0
RARS, argS; arginyl-tRNA synthetase [EC:6.1.1.19]	K01887	3	1	1	1	2	1	1	1	1	3	0	0	0	0	1	1	1	0	0	1	1	1	0	1	1	1	1	1	1	0	1	1	1	1	0	0	1	0	1	1	2	3	1	1	1	1	1	0
FARSA, pheS; phenylalanyl-tRNA synthetase alpha chain [EC:6.1.1.20]	K01889	5	0	1	1	1	1	1	1	1	1	1	0	1	1	1	1	0	0	2	1	1	2	1	1	0	1	0	1	1	1	1	1	1	1	0	1	1	1	1	1	1	0	1	1	1	1	2	0
FARSB, pheT; phenylalanyl-tRNA synthetase beta chain [EC:6.1.1.20]	K01890	3	0	2	2	1	1	1	2	1	2	0	0	1	1	1	1	1	0	1	0	1	1	1	2	1	1	1	1	1	1	1	1	1	1	0	0	1	1	1	1	1	1	2	1	2	1	1	0
HARS, hisS; histidyl-tRNA synthetase [EC:6.1.1.21]	K01892	5	2	1	1	1	1	1	0	2	1	0	0	1	1	0	1	0	1	1	0	1	1	1	0	2	0	0	1	1	1	1	1	1	2	1	1	1	0	1	2	2	2	0	1	1	1	1	1
NARS, asnS; asparaginyl-tRNA synthetase [EC:6.1.1.22]	K01893	5	0	1	2	1	1	1	2	1	1	1	0	0	1	0	1	0	0	2	1	0	1	1	0	0	2	2	1	1	1	1	1	1	1	1	1	2	0	0	1	0	1	0	1	0	0	1	0
gluQ; glutamyl-Q tRNA(Asp) synthetase [EC:6.1.1.-]	K01894	0	0	0	0	0	0	0	0	0	0	0	0	0	0	0	0	0	0	0	0	0	0	0	0	0	0	0	0	0	0	0	0	0	0	0	0	0	0	0	0	0	0	0	0	0	0	0	0
ACSS, acs; acetyl-CoA synthetase [EC:6.2.1.1]	K01895	6	1	1	1	1	2	1	2	1	1	0	2	1	1	3	1	3	2	4	1	0	1	1	3	0	2	0	0	0	1	2	1	2	1	1	1	0	0	1	1	1	2	3	2	0	0	2	0
ACSM; medium-chain acyl-CoA synthetase [EC:6.2.1.2]	K01896	0	0	0	0	0	0	0	0	0	0	0	0	0	0	0	0	0	0	0	0	0	0	0	0	0	0	0	0	0	0	0	0	0	0	0	0	0	0	0	0	0	0	2	0	0	0	0	0
ACSL, fadD; long-chain acyl-CoA synthetase [EC:6.2.1.3]	K01897	4	0	0	4	1	0	2	1	3	10	0	7	2	6	19	5	1	8	12	2	3	0	1	2	0	1	0	1	3	1	16	3	30	6	4	1	5	7	3	4	5	4	11	6	17	1	2	1
LSC2; succinyl-CoA synthetase beta subunit [EC:6.2.1.4 6.2.1.5]	K01900	0	0	0	0	0	0	0	0	0	0	0	0	0	0	0	0	0	0	0	0	0	0	0	0	0	0	0	0	0	0	0	0	0	0	0	0	0	0	0	0	0	0	0	0	0	0	0	0
sucD; succinyl-CoA synthetase alpha subunit [EC:6.2.1.5]	K01902	2	1	1	1	1	1	1	1	0	0	0	3	0	1	1	2	0	0	4	0	0	1	0	0	0	0	0	1	1	1	1	1	1	2	1	0	2	0	1	1	1	1	3	2	1	0	1	0
sucC; succinyl-CoA synthetase beta subunit [EC:6.2.1.5]	K01903	5	1	1	1	1	1	1	1	1	0	0	3	0	1	2	2	0	1	4	0	0	1	0	0	0	0	0	1	0	1	1	1	1	1	1	0	2	1	1	1	1	0	2	2	0	0	2	0
4CL; 4-coumarate--CoA ligase [EC:6.2.1.12]	K01904	0	0	0	0	0	0	0	0	0	1	0	0	0	0	0	0	0	0	0	0	0	0	0	0	0	0	0	0	0	0	0	0	0	0	0	0	0	0	2	0	0	0	0	0	0	0	0	0
acdA; acetate---CoA ligase (ADP-forming) subunit alpha [EC:6.2.1.13]	K01905	0	0	0	0	0	0	0	0	0	0	0	3	0	0	3	0	0	0	2	1	0	0	0	0	0	0	0	0	0	0	7	0	5	1	0	0	0	0	0	0	3	0	3	3	5	0	0	2
bioW; 6-carboxyhexanoate--CoA ligase [EC:6.2.1.14]	K01906	0	0	0	0	0	0	0	0	0	0	0	0	0	0	0	0	0	0	0	0	0	0	0	0	0	0	0	0	0	0	0	0	0	0	0	0	0	0	0	0	0	0	0	0	0	0	0	0
AACS, acsA; acetoacetyl-CoA synthetase [EC:6.2.1.16]	K01907	0	0	0	0	0	1	0	1	0	0	0	1	0	1	2	0	0	0	2	0	1	0	0	0	0	0	0	0	1	1	1	1	2	0	0	0	0	0	1	0	0	0	1	3	0	0	0	1
prpE; propionyl-CoA synthetase [EC:6.2.1.17]	K01908	2	0	0	0	0	0	0	0	0	0	0	0	0	0	0	1	0	0	1	0	0	0	0	0	0	0	0	0	0	0	0	0	0	0	0	0	0	0	0	0	0	0	0	0	0	0	0	0
mbtM; long-chain-fatty-acid--[acyl-carrier-protein] ligase [EC:6.2.1.20]	K01909	0	0	1	0	0	0	0	0	0	0	0	0	0	0	0	0	0	0	0	0	0	1	1	0	0	0	1	0	0	0	0	0	0	0	0	0	0	0	0	0	0	0	0	0	0	0	0	0
menE; O-succinylbenzoic acid---CoA ligase [EC:6.2.1.26]	K01911	3	1	0	1	0	1	0	1	0	1	0	0	1	1	0	0	0	0	0	0	0	0	0	0	0	0	0	0	1	0	0	0	0	0	0	0	0	0	1	0	0	1	0	0	0	0	1	0
paaK; phenylacetate-CoA ligase [EC:6.2.1.30]	K01912	4	2	1	0	1	1	0	1	1	1	1	6	0	2	3	5	0	0	3	0	1	0	5	0	0	1	7	1	0	0	3	3	9	6	1	1	0	0	0	0	4	0	4	2	1	1	4	0
asnA; aspartate--ammonia ligase [EC:6.3.1.1]	K01914	0	0	0	0	0	0	0	0	0	0	0	0	0	2	0	0	0	0	0	0	0	2	0	0	1	0	0	1	0	0	1	0	1	1	0	1	1	1	0	1	0	0	0	0	0	0	1	0
glnA, GLUL; glutamine synthetase [EC:6.3.1.2]	K01915	8	0	2	1	2	1	1	0	2	3	0	1	3	3	0	1	1	0	1	0	1	1	2	0	0	0	0	2	2	2	3	2	1	2	2	1	2	3	2	1	2	2	1	3	2	1	1	2
nadE; NAD+ synthase [EC:6.3.1.5]	K01916	2	0	0	0	0	0	0	0	0	0	0	0	0	1	1	0	0	0	0	0	1	1	1	1	0	0	1	1	0	0	2	0	0	1	0	0	0	0	0	1	0	0	0	1	0	0	1	1
panC; pantoate--beta-alanine ligase [EC:6.3.2.1]	K01918	3	1	1	1	1	2	1	0	1	1	0	1	0	1	1	1	0	0	0	1	1	1	0	0	0	0	1	1	1	0	0	1	1	1	0	1	1	1	1	1	2	1	0	0	1	1	2	1
gshA; glutamate--cysteine ligase [EC:6.3.2.2]	K01919	0	0	0	1	0	0	0	0	0	1	0	0	0	0	0	0	0	0	0	0	0	0	0	0	0	0	1	0	0	1	0	0	1	0	0	0	0	0	0	0	0	0	0	0	1	0	0	0
gshB; glutathione synthase [EC:6.3.2.3]	K01920	0	0	0	0	0	1	0	0	0	1	0	0	1	3	0	0	0	3	0	0	0	1	1	0	0	0	2	0	0	0	0	0	0	0	0	0	0	0	0	0	0	0	0	0	0	0	0	0
ddl; D-alanine-D-alanine ligase [EC:6.3.2.4]	K01921	3	1	2	3	0	2	2	2	1	2	0	0	1	0	1	1	0	1	2	1	2	1	2	2	0	1	4	1	1	0	4	1	0	0	0	1	2	4	2	1	0	1	4	3	1	0	1	0
PPCS, COAB; phosphopantothenate---cysteine ligase (ATP) [EC:6.3.2.51]	K01922	0	0	1	0	0	0	0	0	0	0	0	0	0	0	0	0	0	0	0	0	0	0	0	0	0	0	0	0	0	0	0	0	0	0	0	0	0	0	0	0	0	0	0	0	0	0	0	0
purC; phosphoribosylaminoimidazole-succinocarboxamide synthase [EC:6.3.2.6]	K01923	3	0	1	1	1	1	1	1	1	1	0	1	1	1	0	2	0	0	1	0	0	1	0	1	3	1	1	1	0	1	2	1	1	1	0	0	1	1	1	2	1	0	2	1	2	2	1	1
murC; UDP-N-acetylmuramate--alanine ligase [EC:6.3.2.8]	K01924	4	0	0	1	0	0	1	2	1	1	0	0	1	1	2	1	0	2	0	2	1	1	0	1	0	2	2	0	1	1	1	1	1	0	0	1	1	1	1	1	0	1	1	1	1	1	1	0
murD; UDP-N-acetylmuramoylalanine--D-glutamate ligase [EC:6.3.2.9]	K01925	4	0	0	1	0	1	1	1	1	1	0	0	1	1	0	1	0	1	1	0	1	1	1	1	0	1	1	0	1	1	1	2	1	0	0	1	1	1	1	2	0	2	1	2	2	1	1	0
rex; redox-sensing transcriptional repressor	K01926	0	0	0	0	0	0	0	2	0	0	0	0	0	0	1	0	0	0	0	1	0	1	1	0	1	2	0	0	0	0	2	2	3	0	0	1	2	0	1	1	0	2	0	0	0	2	3	0
murE; UDP-N-acetylmuramoyl-L-alanyl-D-glutamate--2,6-diaminopimelate ligase [EC:6.3.2.13]	K01928	5	2	0	0	1	1	1	1	1	2	0	0	1	0	1	0	0	0	0	1	1	1	1	0	0	0	1	0	0	1	1	1	2	0	0	1	1	1	1	1	0	1	1	1	1	2	1	0
murF; UDP-N-acetylmuramoyl-tripeptide--D-alanyl-D-alanine ligase [EC:6.3.2.10]	K01929	3	1	0	0	0	1	1	1	1	3	0	0	1	1	1	1	0	1	1	1	1	1	1	1	0	2	2	0	0	1	1	1	1	0	0	1	2	1	1	0	0	1	1	1	2	2	1	0
FPGS; folylpolyglutamate synthase [EC:6.3.2.17]	K01930	0	0	0	0	0	0	0	0	0	0	0	0	0	0	0	0	0	0	0	0	0	0	0	0	0	0	0	0	0	0	0	0	0	0	0	0	0	0	0	0	0	0	0	0	0	0	0	0
purM; phosphoribosylformylglycinamidine cyclo-ligase [EC:6.3.3.1]	K01933	5	1	1	1	0	1	1	1	1	1	0	0	1	1	0	1	0	0	1	0	1	2	1	1	0	0	1	1	1	1	2	1	1	1	0	1	1	0	1	1	2	1	1	1	1	1	0	0
MTHFS; 5-formyltetrahydrofolate cyclo-ligase [EC:6.3.3.2]	K01934	4	0	1	0	1	0	1	0	1	0	0	1	2	0	0	2	0	0	2	1	1	1	1	0	0	0	1	0	0	0	0	0	0	0	0	1	1	0	1	0	0	0	0	1	0	1	1	0
bioD; dethiobiotin synthetase [EC:6.3.3.3]	K01935	3	0	0	1	1	1	1	0	1	1	0	0	1	0	0	1	0	1	0	0	1	1	1	0	0	0	1	0	0	0	0	0	0	0	0	0	0	0	0	0	0	0	0	0	1	0	1	0
pyrG, CTPS; CTP synthase [EC:6.3.4.2]	K01937	3	0	2	2	1	1	1	2	1	1	0	0	1	1	0	1	0	2	1	0	1	1	1	1	0	1	1	1	1	1	2	1	0	1	0	2	1	1	0	2	1	1	0	1	1	1	2	1
fhs; formate--tetrahydrofolate ligase [EC:6.3.4.3]	K01938	0	0	0	0	0	1	1	1	1	0	0	0	0	1	0	1	1	0	1	0	1	2	1	1	0	1	1	1	0	0	1	0	2	1	0	1	1	0	1	0	1	0	0	1	0	0	1	0
purA, ADSS; adenylosuccinate synthase [EC:6.3.4.4]	K01939	4	1	1	2	1	3	1	1	1	4	0	0	1	1	0	2	0	1	0	1	1	1	1	2	0	1	1	1	1	1	1	1	1	1	1	1	1	1	1	1	1	1	1	1	0	1	1	1
argG, ASS1; argininosuccinate synthase [EC:6.3.4.5]	K01940	2	0	1	1	1	1	1	2	1	1	0	1	1	1	1	1	0	1	0	1	0	1	0	1	0	0	0	0	1	0	1	0	0	1	0	1	1	1	1	1	1	0	1	1	0	1	1	1
E6.3.4.6; urea carboxylase [EC:6.3.4.6]	K01941	0	0	0	0	0	0	0	0	0	0	0	0	0	0	0	0	0	0	0	0	0	0	0	0	0	0	0	0	0	0	0	0	0	0	0	0	0	0	0	0	0	0	0	0	0	0	0	0
HLCS; biotin---protein ligase [EC:6.3.4.9 6.3.4.10 6.3.4.11 6.3.4.15]	K01942	0	0	0	0	0	0	0	0	0	0	0	0	0	0	0	0	0	1	0	0	0	0	0	0	0	0	0	0	0	0	0	0	0	0	0	0	0	0	0	0	0	0	0	0	0	0	0	0
purD; phosphoribosylamine---glycine ligase [EC:6.3.4.13]	K01945	6	0	1	1	0	1	4	1	1	2	0	0	1	3	1	2	1	0	0	1	1	2	1	1	2	1	1	1	1	2	2	1	2	1	0	1	1	1	1	1	2	1	1	1	0	2	1	1
CPS1; carbamoyl-phosphate synthase (ammonia) [EC:6.3.4.16]	K01948	0	0	0	0	0	0	0	0	0	0	0	0	0	0	0	0	0	0	0	0	0	0	0	0	0	0	0	0	0	0	0	0	0	0	0	0	0	0	0	0	0	0	0	0	0	0	0	0
E6.3.5.1, NADSYN1, QNS1, nadE; NAD+ synthase (glutamine-hydrolysing) [EC:6.3.5.1]	K01950	0	1	2	0	1	1	1	0	1	1	0	0	0	1	0	1	0	0	0	1	1	0	1	2	1	0	1	0	1	1	0	1	1	0	1	0	1	1	1	0	0	1	0	1	0	1	1	0
guaA, GMPS; GMP synthase (glutamine-hydrolysing) [EC:6.3.5.2]	K01951	3	1	1	1	1	1	1	4	1	2	0	2	1	2	0	1	0	2	1	1	0	1	1	0	2	1	2	3	1	1	3	1	2	1	1	2	1	2	1	2	1	2	1	2	1	1	2	1
purL, PFAS; phosphoribosylformylglycinamidine synthase [EC:6.3.5.3]	K01952	5	2	2	4	3	1	3	2	2	4	0	2	3	2	3	1	0	1	3	2	2	2	1	1	1	1	2	4	3	2	2	1	3	2	0	3	2	1	3	3	2	1	3	2	0	2	2	3
asnB, ASNS; asparagine synthase (glutamine-hydrolysing) [EC:6.3.5.4]	K01953	10	0	4	1	7	1	5	5	8	5	0	1	0	4	0	2	0	2	1	3	2	2	6	5	0	5	3	2	1	0	6	0	2	2	0	0	0	1	0	1	2	1	0	4	1	1	1	0
carB, CPA2; carbamoyl-phosphate synthase large subunit [EC:6.3.5.5]	K01955	2	1	2	2	2	2	2	0	2	0	2	1	1	3	0	2	0	0	2	1	1	3	2	1	0	1	1	1	1	0	1	2	1	4	0	3	1	2	1	7	3	2	1	5	0	3	6	0
carA, CPA1; carbamoyl-phosphate synthase small subunit [EC:6.3.5.5]	K01956	4	1	1	1	1	1	1	0	1	1	0	0	1	1	0	1	0	0	1	1	0	1	0	1	0	1	0	1	1	0	0	1	1	1	0	1	1	1	1	1	1	0	0	2	1	1	1	0
PC, pyc; pyruvate carboxylase [EC:6.4.1.1]	K01958	0	1	2	0	2	1	0	0	1	1	0	0	0	0	0	1	0	0	0	0	1	0	0	0	0	0	0	0	0	0	0	0	0	0	0	0	0	0	0	0	0	0	0	0	0	0	0	1
pycA; pyruvate carboxylase subunit A [EC:6.4.1.1]	K01959	0	0	0	0	0	0	0	0	0	0	0	0	0	0	0	0	0	0	0	0	0	0	0	0	0	0	0	0	0	0	0	0	0	0	0	0	0	0	0	0	1	0	1	0	0	0	0	1
pycB; pyruvate carboxylase subunit B [EC:6.4.1.1]	K01960	0	0	0	0	0	0	0	0	1	0	1	0	0	1	1	2	0	1	2	0	0	0	0	0	0	0	0	0	1	0	1	1	1	1	0	0	1	0	0	1	1	0	0	2	1	0	0	0
accC; acetyl-CoA carboxylase, biotin carboxylase subunit [EC:6.4.1.2 6.3.4.14]	K01961	6	0	1	2	1	1	0	2	1	4	0	0	0	0	1	0	0	0	0	0	0	1	1	1	0	0	2	3	2	2	1	1	1	1	0	1	0	1	0	2	0	1	2	1	0	1	2	0
accA; acetyl-CoA carboxylase carboxyl transferase subunit alpha [EC:6.4.1.2 2.1.3.15]	K01962	1	1	1	0	1	2	1	1	1	2	0	0	1	0	0	0	0	0	0	1	0	1	1	1	1	0	2	1	1	0	0	0	0	0	0	2	0	0	0	0	0	0	0	0	0	1	1	0
accD; acetyl-CoA carboxylase carboxyl transferase subunit beta [EC:6.4.1.2 2.1.3.15]	K01963	2	1	1	0	1	1	1	1	1	1	0	0	1	0	0	1	0	1	0	1	0	1	1	1	0	1	1	1	1	1	0	0	0	1	0	0	0	0	0	0	0	0	0	0	0	1	1	0
PCCA, pccA; propionyl-CoA carboxylase alpha chain [EC:6.4.1.3]	K01965	2	0	0	0	0	0	0	0	0	0	0	0	0	0	0	0	0	1	0	0	0	0	0	0	0	0	0	1	0	0	1	0	0	0	0	0	0	1	0	0	0	1	0	0	0	0	0	0
PCCB, pccB; propionyl-CoA carboxylase beta chain [EC:6.4.1.3 2.1.3.15]	K01966	1	0	0	2	0	0	0	1	0	1	0	0	0	0	3	1	0	0	0	0	0	0	0	0	0	0	0	1	1	1	6	1	2	0	2	0	1	1	1	1	0	2	0	2	1	0	0	2
E6.4.1.4A; 3-methylcrotonyl-CoA carboxylase alpha subunit [EC:6.4.1.4]	K01968	0	0	0	1	0	0	0	0	0	0	0	0	0	0	0	0	0	0	0	0	0	0	0	0	0	0	0	0	0	0	0	0	0	0	0	0	0	2	0	1	0	2	0	0	0	0	0	0
E6.4.1.4B; 3-methylcrotonyl-CoA carboxylase beta subunit [EC:6.4.1.4]	K01969	0	0	0	0	1	0	0	0	0	0	0	0	0	1	0	0	0	0	0	0	1	0	0	0	0	0	0	1	0	0	0	1	0	0	0	0	0	1	0	2	0	1	1	0	0	0	0	0
ligD; bifunctional non-homologous end joining protein LigD [EC:6.5.1.1]	K01971	3	0	0	0	0	0	0	1	0	0	0	0	0	0	0	0	0	0	0	0	0	0	0	0	0	0	0	0	0	0	1	0	1	0	0	0	0	0	0	0	0	0	0	0	0	0	0	0
E6.5.1.2, ligA, ligB; DNA ligase (NAD+) [EC:6.5.1.2]	K01972	4	0	1	1	1	1	1	1	1	1	0	1	1	1	1	1	1	1	1	1	1	1	0	1	1	0	1	1	1	1	1	1	2	1	1	1	1	0	2	1	1	1	1	1	0	1	0	0
RTCA, rtcA; RNA 3'-terminal phosphate cyclase (ATP) [EC:6.5.1.4]	K01974	0	0	0	0	0	0	0	0	0	0	0	0	0	0	0	0	0	0	1	0	0	0	0	1	0	0	2	0	0	0	0	0	0	0	0	1	0	0	0	0	0	0	0	0	0	0	0	0
thpR; RNA 2',3'-cyclic 3'-phosphodiesterase [EC:3.1.4.58]	K01975	0	0	0	0	0	0	1	1	0	0	0	0	0	1	1	1	0	0	1	1	0	1	1	1	0	0	0	1	1	1	1	1	0	1	0	1	0	0	0	0	1	1	1	0	1	0	1	1
ABC.X4.S; putative ABC transport system substrate-binding protein	K01989	0	0	0	0	1	0	0	0	0	0	0	0	0	0	0	2	0	0	0	0	0	0	0	2	0	0	0	1	0	0	3	0	0	1	0	0	1	0	0	0	0	0	0	0	0	1	0	0
ABC-2.A; ABC-2 type transport system ATP-binding protein	K01990	16	6	17	5	18	4	4	12	19	12	3	1	2	2	3	2	0	9	5	6	0	10	17	14	3	9	16	8	9	8	11	6	3	9	12	9	12	3	6	7	2	11	2	6	3	3	26	3
wza, gfcE; polysaccharide biosynthesis/export protein	K01991	14	0	0	1	1	3	1	1	3	0	0	1	0	1	0	1	1	1	2	0	0	4	2	0	0	0	4	0	0	0	3	1	0	0	0	0	0	0	0	2	0	0	0	1	1	1	0	0
ABC-2.P; ABC-2 type transport system permease protein	K01992	10	5	6	1	8	6	4	8	7	12	1	1	3	1	3	3	0	3	3	1	0	5	3	2	0	2	4	5	6	5	9	7	4	6	10	1	8	6	3	5	0	8	4	4	5	3	3	2
ABC-2.TX; HlyD family secretion protein	K01993	1	0	0	0	0	1	1	1	1	0	0	0	0	0	0	1	0	0	0	0	0	0	1	0	0	0	1	0	0	0	1	1	0	0	0	0	0	1	0	1	0	1	0	0	0	0	0	0
livG; branched-chain amino acid transport system ATP-binding protein	K01995	0	0	0	1	1	1	0	0	0	3	0	6	0	7	12	2	0	0	13	0	1	0	1	0	0	1	0	1	0	0	16	1	29	6	2	0	2	0	2	1	3	2	10	9	0	0	0	0
livF; branched-chain amino acid transport system ATP-binding protein	K01996	0	0	0	2	1	1	0	0	0	2	0	5	0	9	12	2	0	0	16	0	1	0	1	0	0	0	0	1	0	0	18	0	30	6	1	0	2	0	2	1	3	2	9	8	0	0	0	0
livH; branched-chain amino acid transport system permease protein	K01997	0	1	0	1	0	0	0	0	0	0	0	9	0	6	10	2	0	0	14	0	1	0	0	0	0	1	0	1	0	0	13	1	25	5	1	0	2	0	4	1	3	1	10	10	0	0	0	0
livM; branched-chain amino acid transport system permease protein	K01998	0	1	0	1	0	1	0	0	0	2	0	6	0	8	12	2	0	0	17	0	2	0	0	0	0	1	0	1	0	0	19	1	24	6	1	0	2	0	1	1	4	1	11	9	0	0	1	0
livK; branched-chain amino acid transport system substrate-binding protein	K01999	0	3	0	2	0	1	0	0	0	3	0	8	0	7	10	4	0	0	16	0	3	0	1	1	0	1	1	1	0	0	12	0	27	3	1	1	2	1	2	2	2	0	7	9	0	0	1	0
proV; glycine betaine/proline transport system ATP-binding protein [EC:3.6.3.32]	K02000	0	0	0	0	0	0	0	0	0	0	0	0	0	0	0	0	0	0	0	0	0	0	0	0	0	0	0	0	0	0	1	0	0	0	0	0	1	0	1	0	0	0	0	0	0	0	0	0
proW; glycine betaine/proline transport system permease protein	K02001	0	0	0	0	0	0	0	0	0	0	0	0	0	0	0	0	0	0	0	0	0	0	0	0	0	0	0	0	0	0	2	0	0	0	0	0	1	0	1	0	0	0	0	0	0	0	0	0
proX; glycine betaine/proline transport system substrate-binding protein	K02002	0	0	0	0	0	0	0	0	0	0	0	0	0	0	0	0	0	0	0	0	0	0	0	0	0	0	0	0	0	0	1	0	0	0	0	0	1	0	1	0	0	1	0	0	0	0	0	0
ABC.CD.A; putative ABC transport system ATP-binding protein	K02003	7	6	6	1	9	7	5	8	10	1	2	4	2	6	4	9	3	4	4	2	1	5	4	8	4	2	7	4	3	3	8	5	4	6	1	3	2	4	0	9	1	8	1	7	1	0	11	1
ABC.CD.P; putative ABC transport system permease protein	K02004	11	6	4	2	9	8	6	52	8	0	0	3	2	5	5	9	2	4	4	3	1	8	8	8	3	6	11	15	5	10	7	9	4	5	1	3	3	16	0	30	1	56	2	6	1	0	34	1
ABC.CD.TX; HlyD family secretion protein	K02005	6	6	1	1	4	3	2	2	2	1	0	0	2	1	1	2	3	0	1	1	0	2	5	4	1	1	4	5	2	5	3	3	1	0	1	1	0	2	0	5	0	3	1	2	1	0	3	0
cbiO; cobalt/nickel transport system ATP-binding protein	K02006	0	0	1	0	0	0	0	0	2	0	0	0	1	1	0	1	0	0	1	0	1	1	0	1	0	0	0	0	0	0	2	0	1	1	0	1	0	0	0	0	0	0	0	1	1	0	1	0
cbiM; cobalt/nickel transport system permease protein	K02007	0	0	0	0	0	0	0	0	1	0	0	0	1	0	0	1	0	0	1	0	1	1	1	2	0	0	1	0	0	0	1	0	1	1	0	1	0	0	0	0	0	0	0	1	1	0	1	0
cbiQ; cobalt/nickel transport system permease protein	K02008	0	0	0	0	0	0	0	0	2	0	0	0	1	1	0	1	0	0	1	0	1	1	0	1	0	0	1	0	0	0	1	0	1	1	0	1	0	0	0	0	0	0	0	1	1	0	1	0
cbiN; cobalt/nickel transport protein	K02009	0	0	0	0	0	0	0	0	0	0	0	0	1	0	0	1	0	0	0	0	2	0	1	2	0	0	1	0	0	0	1	0	0	0	0	0	0	0	0	0	0	0	0	1	0	0	0	0
afuC, fbpC; iron(III) transport system ATP-binding protein [EC:3.6.3.30]	K02010	0	2	0	1	0	1	0	0	0	0	1	4	0	0	0	0	0	0	1	0	0	0	0	1	0	0	0	0	0	0	1	0	1	0	0	0	1	0	0	0	0	2	0	0	0	0	0	0
afuB, fbpB; iron(III) transport system permease protein	K02011	0	1	0	0	0	1	0	0	0	0	2	3	1	0	0	0	0	0	2	0	0	1	0	2	0	0	0	0	0	0	1	0	2	0	0	0	2	0	0	0	0	0	0	1	0	0	0	0
afuA, fbpA; iron(III) transport system substrate-binding protein	K02012	0	0	0	0	2	0	0	1	1	1	0	2	1	0	0	0	1	0	3	0	0	1	2	0	0	0	1	0	0	0	0	0	1	0	0	0	2	0	0	0	0	1	0	0	0	0	0	0
ABC.FEV.A; iron complex transport system ATP-binding protein [EC:3.6.3.34]	K02013	2	1	0	1	2	2	2	2	0	0	1	1	1	1	0	1	0	1	1	1	0	0	0	1	0	0	1	1	0	0	1	0	1	1	0	0	2	0	1	1	1	2	1	2	1	1	2	0
TC.FEV.OM; iron complex outermembrane recepter protein	K02014	26	15	0	0	0	0	1	6	0	2	0	0	0	0	0	1	0	1	0	0	1	1	4	4	0	0	0	2	2	1	1	8	0	0	0	2	0	4	0	11	0	14	0	4	2	1	1	0
ABC.FEV.P; iron complex transport system permease protein	K02015	3	0	0	1	1	1	1	1	0	0	0	1	0	1	0	1	0	1	1	1	0	1	0	1	0	0	0	1	0	0	1	0	1	1	0	0	2	1	1	1	1	2	0	2	1	1	1	0
ABC.FEV.S; iron complex transport system substrate-binding protein	K02016	3	0	0	1	1	1	1	2	1	1	1	1	0	0	0	1	0	0	1	1	0	1	1	2	0	0	0	1	0	0	1	0	1	2	0	0	2	1	1	1	1	3	1	2	1	1	1	1
modC; molybdate transport system ATP-binding protein [EC:3.6.3.29]	K02017	0	0	0	0	1	0	1	2	1	1	0	0	0	0	0	0	1	0	0	0	0	2	1	2	0	1	0	0	0	0	0	0	0	0	0	0	0	0	1	1	0	1	0	0	0	0	4	0
modB; molybdate transport system permease protein	K02018	0	0	0	1	2	1	1	0	1	1	0	0	0	0	0	0	1	0	0	0	0	2	2	1	0	1	0	0	0	0	0	0	0	0	0	0	0	0	1	1	0	0	1	0	0	0	2	0
modE; molybdate transport system regulatory protein	K02019	1	0	0	0	0	0	1	0	1	0	0	0	0	1	0	0	0	0	1	0	0	1	0	0	1	0	0	0	0	0	1	1	1	0	0	1	1	0	0	0	0	0	0	0	0	0	1	0
modA; molybdate transport system substrate-binding protein	K02020	0	0	0	1	0	2	1	0	0	0	0	1	0	0	0	1	0	0	0	0	0	3	1	2	0	2	0	0	0	0	0	0	0	0	0	1	0	0	1	1	0	0	1	0	0	0	2	0
ABC.MR; putative ABC transport system ATP-binding protein	K02021	0	0	0	0	1	0	0	0	0	0	0	0	0	0	0	0	0	0	0	0	0	0	0	0	0	0	0	0	0	0	0	0	0	0	0	0	0	0	0	0	0	0	0	0	0	0	0	0
ABC.MR.TX; HlyD family secretion protein	K02022	1	0	0	0	0	0	0	1	0	0	0	0	0	0	0	0	0	0	0	0	0	0	0	0	0	0	0	0	0	0	0	1	0	0	0	0	0	2	0	1	0	1	0	0	0	0	0	0
lamB; maltoporin	K02024	0	0	0	1	0	0	0	0	0	0	0	0	0	0	0	0	0	1	0	0	0	0	0	0	0	0	0	0	0	0	0	0	0	0	0	0	0	0	0	0	0	0	0	0	0	0	0	0
ABC.MS.P; multiple sugar transport system permease protein	K02025	0	1	0	0	0	1	0	0	0	0	3	2	1	0	1	2	1	0	0	2	0	0	0	1	1	3	0	0	2	2	4	1	4	0	1	1	33	1	0	0	0	0	1	2	0	0	0	1
ABC.MS.P1; multiple sugar transport system permease protein	K02026	0	1	0	0	0	4	0	0	0	0	0	2	1	0	1	1	2	0	0	3	0	0	0	1	2	3	0	0	2	2	4	1	2	0	1	1	32	1	0	0	0	1	0	1	0	1	0	2
ABC.MS.S; multiple sugar transport system substrate-binding protein	K02027	0	1	0	0	0	2	0	0	0	1	2	2	1	0	3	2	0	1	0	1	0	2	0	1	0	3	0	0	2	2	5	1	2	0	2	1	26	0	0	0	0	1	0	2	0	1	0	1
ABC.PA.A; polar amino acid transport system ATP-binding protein [EC:7.4.2.1]	K02028	0	0	1	0	0	0	0	0	0	1	0	1	1	2	0	0	0	0	4	0	0	0	0	1	0	0	0	0	0	0	1	0	0	0	1	0	2	0	2	0	0	0	2	1	0	0	0	0
ABC.PA.P; polar amino acid transport system permease protein	K02029	0	0	0	0	0	0	1	0	0	0	0	0	0	1	0	0	0	0	7	0	0	0	0	1	0	0	0	0	0	0	1	0	0	0	0	0	2	0	3	0	0	0	3	1	0	0	0	0
ABC.PA.S; polar amino acid transport system substrate-binding protein	K02030	0	0	0	1	0	0	4	0	0	0	0	3	1	4	4	1	0	0	8	0	0	0	1	0	0	1	0	0	0	1	2	0	10	1	1	1	2	1	2	1	0	2	1	6	1	0	1	0
ABC.PE.A; peptide/nickel transport system ATP-binding protein	K02031	0	0	0	1	0	2	2	2	0	0	1	4	0	2	0	0	0	1	6	0	1	0	0	0	0	1	0	0	0	1	13	0	3	1	2	0	5	0	0	0	1	0	0	1	0	1	0	0
ABC.PE.A1; peptide/nickel transport system ATP-binding protein	K02032	2	0	0	3	0	1	2	0	0	4	1	2	0	6	0	0	0	1	4	1	1	0	0	1	1	0	0	0	1	1	11	1	2	1	1	0	6	0	0	0	2	0	0	2	0	1	0	2
ABC.PE.P; peptide/nickel transport system permease protein	K02033	1	0	0	2	0	0	1	2	0	0	1	6	1	3	1	0	0	0	8	1	0	0	0	0	0	0	0	0	1	1	23	1	4	1	10	0	8	0	0	0	3	0	1	2	0	1	0	1
ABC.PE.P1; peptide/nickel transport system permease protein	K02034	1	0	0	2	0	0	1	3	0	2	1	4	1	4	1	0	0	1	5	2	0	0	0	1	0	0	0	0	3	1	23	0	3	1	10	0	8	1	0	0	3	0	1	2	1	1	0	2
ABC.PE.S; peptide/nickel transport system substrate-binding protein	K02035	0	0	0	3	0	0	0	2	0	1	1	5	1	2	0	0	0	3	14	1	0	0	0	0	0	0	0	0	2	1	31	1	3	1	8	0	10	0	0	0	1	0	3	3	1	1	0	2
pstB; phosphate transport system ATP-binding protein [EC:7.3.2.1]	K02036	1	1	1	1	1	1	2	3	2	2	0	0	1	0	0	1	0	0	0	0	0	0	0	0	0	0	0	0	0	0	1	0	0	0	0	0	0	1	2	0	0	1	0	0	0	0	0	0
pstC; phosphate transport system permease protein	K02037	1	1	0	1	2	1	2	2	2	2	0	0	1	0	0	1	0	0	0	0	0	0	0	0	0	0	0	0	0	0	1	0	0	0	0	0	0	1	2	0	0	1	0	0	0	0	1	0
pstA; phosphate transport system permease protein	K02038	1	1	1	1	1	1	3	2	2	2	0	0	1	0	0	1	0	0	0	0	0	0	0	0	0	0	0	0	0	0	1	0	0	0	0	0	0	1	2	0	0	1	0	0	0	0	1	0
phoU; phosphate transport system protein	K02039	1	1	1	1	1	1	1	1	1	0	0	0	0	0	0	1	0	0	0	0	0	0	0	0	0	0	0	0	0	0	0	0	0	0	0	0	0	0	1	0	0	0	0	1	0	0	0	0
pstS; phosphate transport system substrate-binding protein	K02040	4	1	1	1	2	1	2	2	2	2	0	1	1	0	0	2	0	0	1	0	0	0	0	0	0	0	0	0	1	0	2	0	0	0	0	0	0	2	1	0	0	2	0	1	0	0	2	0
phnC; phosphonate transport system ATP-binding protein [EC:7.3.2.2]	K02041	0	1	0	0	0	0	1	1	0	0	0	0	1	0	0	1	0	0	1	0	0	0	0	0	0	0	0	0	0	0	0	0	0	0	1	0	0	0	0	0	0	0	0	1	0	0	0	0
phnE; phosphonate transport system permease protein	K02042	0	2	0	0	0	0	1	2	0	0	0	0	1	0	0	2	0	0	0	0	0	0	0	0	0	0	0	0	0	0	0	0	0	0	0	0	0	0	0	0	0	0	0	1	0	0	0	0
phnF; GntR family transcriptional regulator, phosphonate transport system regulatory protein	K02043	0	0	0	0	0	0	0	0	0	0	0	0	0	0	0	0	0	0	0	0	0	0	0	0	0	0	0	0	0	0	0	0	0	0	0	0	0	0	0	0	0	0	0	0	0	0	0	0
phnD; phosphonate transport system substrate-binding protein	K02044	0	4	0	0	0	0	1	1	0	1	1	0	1	1	0	4	0	0	2	0	0	1	0	1	0	1	0	0	1	0	0	0	1	0	0	0	0	0	0	0	0	0	0	2	0	0	1	0
cysA; sulfate transport system ATP-binding protein [EC:3.6.3.25]	K02045	0	0	1	0	0	0	0	0	0	0	0	0	0	0	0	0	0	0	0	0	0	0	0	0	1	0	1	0	0	0	0	0	0	0	0	0	0	0	0	0	0	0	0	0	0	0	0	0
cysU; sulfate transport system permease protein	K02046	0	0	1	0	0	0	0	0	0	0	0	0	0	0	0	0	0	0	0	0	0	0	0	0	1	0	1	0	0	0	0	0	0	0	0	0	0	0	0	0	0	0	0	0	0	0	0	0
cysW; sulfate transport system permease protein	K02047	0	0	1	0	0	0	0	0	0	0	0	0	0	0	0	0	0	0	0	0	0	0	0	0	1	0	1	0	0	0	0	0	0	0	0	0	0	0	0	0	0	0	0	0	0	0	0	0
cysP, sbp; sulfate transport system substrate-binding protein	K02048	0	0	1	0	0	0	0	0	0	0	0	0	0	0	0	0	0	0	0	0	0	0	0	0	1	0	1	0	0	0	0	0	0	0	0	0	0	0	0	0	0	0	0	0	0	0	0	0
ABC.SN.A; NitT/TauT family transport system ATP-binding protein	K02049	0	1	0	0	2	1	0	0	1	0	0	0	1	0	3	0	0	0	2	2	0	0	1	1	0	3	0	0	0	0	0	0	3	0	0	0	2	0	1	0	0	0	3	0	1	1	0	0
ABC.SN.P; NitT/TauT family transport system permease protein	K02050	0	2	0	0	2	1	0	0	1	0	0	0	1	0	1	0	0	0	1	0	0	0	1	1	0	3	0	0	0	0	0	0	3	0	0	0	2	0	2	0	0	0	1	0	0	1	0	0
ABC.SN.S; NitT/TauT family transport system substrate-binding protein	K02051	0	2	0	0	2	2	1	0	1	0	1	2	1	0	2	2	0	1	0	0	0	0	2	3	0	3	0	0	0	0	0	1	3	2	0	0	2	0	1	0	1	1	3	3	0	2	0	0
ABC.SP.A; putative spermidine/putrescine transport system ATP-binding protein	K02052	0	0	0	0	0	1	0	0	0	0	0	0	0	0	0	0	0	0	3	0	0	0	1	0	0	0	0	0	0	0	3	0	0	0	0	0	1	0	1	0	0	0	1	0	0	0	0	0
ABC.SP.P; putative spermidine/putrescine transport system permease protein	K02053	0	0	0	0	0	0	0	0	0	0	0	0	0	0	0	0	0	0	2	0	0	0	0	0	0	0	0	0	0	0	1	0	0	0	0	0	1	0	0	0	0	0	0	0	0	0	0	0
ABC.SP.P1; putative spermidine/putrescine transport system permease protein	K02054	0	0	0	0	0	0	0	0	0	0	0	0	0	0	0	0	0	0	2	0	0	0	0	0	0	0	0	0	0	0	0	0	0	0	0	0	1	0	0	0	0	0	0	0	0	0	0	0
ABC.SP.S; putative spermidine/putrescine transport system substrate-binding protein	K02055	0	0	0	0	0	0	0	0	0	0	0	0	0	0	0	0	0	1	1	0	0	0	0	0	0	0	0	0	0	0	1	0	0	0	0	0	1	0	0	0	0	0	0	0	0	0	0	0
ABC.SS.A; simple sugar transport system ATP-binding protein [EC:3.6.3.17]	K02056	0	0	0	0	0	0	0	1	0	0	0	1	0	0	0	0	0	0	2	0	0	1	0	1	2	0	0	0	0	0	2	0	0	0	1	0	8	0	2	0	0	0	1	1	0	0	0	0
ABC.SS.P; simple sugar transport system permease protein	K02057	0	1	0	0	0	0	0	2	0	0	0	2	0	0	1	0	0	1	2	0	0	0	0	0	1	0	0	0	0	0	2	0	1	0	0	0	15	0	3	0	0	0	0	3	0	0	0	0
ABC.SS.S; simple sugar transport system substrate-binding protein	K02058	0	0	0	0	0	0	0	1	0	1	0	0	0	0	0	0	0	0	1	0	0	0	0	0	1	0	0	0	0	0	0	0	0	0	0	0	1	0	1	0	0	0	0	0	0	0	0	0
thiQ; thiamine transport system ATP-binding protein	K02062	0	0	0	0	0	0	0	0	0	0	0	0	0	0	0	0	0	0	0	0	0	0	0	0	0	0	0	0	0	0	0	0	0	0	1	0	1	0	0	0	0	0	0	0	0	0	0	0
thiP; thiamine transport system permease protein	K02063	0	0	0	0	0	0	0	0	0	0	0	0	0	0	0	0	0	0	0	0	0	0	0	0	0	0	0	0	0	0	0	0	0	0	2	0	1	0	1	0	0	0	0	0	0	0	0	0
thiB, tbpA; thiamine transport system substrate-binding protein	K02064	0	0	0	0	0	0	0	0	0	0	0	0	0	0	0	0	0	0	0	0	0	0	0	0	0	0	0	0	0	0	0	0	0	0	1	0	1	0	1	0	0	0	0	0	0	0	0	0
mlaF, linL, mkl; phospholipid/cholesterol/gamma-HCH transport system ATP-binding protein	K02065	8	1	0	2	1	2	1	2	1	3	0	2	1	2	2	2	0	2	1	0	1	1	2	2	0	0	0	1	1	0	1	1	3	0	0	1	0	1	0	1	0	1	0	1	1	1	2	0
mlaE, linK; phospholipid/cholesterol/gamma-HCH transport system permease protein	K02066	8	1	1	4	1	2	1	2	1	4	0	2	1	4	2	2	1	3	1	1	1	1	1	2	0	1	0	1	1	0	1	1	4	0	0	1	0	1	0	1	0	1	0	2	1	1	2	0
mlaD, linM; phospholipid/cholesterol/gamma-HCH transport system substrate-binding protein	K02067	7	0	0	2	1	1	0	1	1	1	0	1	1	3	2	2	0	1	0	1	1	1	1	1	0	0	1	0	0	0	1	1	2	0	0	0	0	1	0	1	0	1	1	2	1	0	1	0
ABC.X2.A; putative ABC transport system ATP-binding protein	K02068	0	0	0	0	0	0	1	0	0	0	0	0	1	0	0	0	0	0	0	0	0	0	0	0	0	0	0	0	1	1	0	0	0	0	0	1	0	0	0	0	0	0	0	0	0	0	1	0
ABC.X2.P; putative ABC transport system permease protein	K02069	0	0	0	0	0	0	1	0	0	0	0	0	1	0	0	1	0	0	0	0	0	0	0	0	0	0	0	0	1	1	0	0	0	0	0	1	0	0	0	0	0	0	0	0	0	0	1	0
metN; D-methionine transport system ATP-binding protein	K02071	0	0	0	0	0	0	0	0	0	0	0	0	0	0	0	0	0	0	0	0	0	0	0	0	0	0	0	0	0	0	0	0	0	0	0	0	0	0	0	0	0	0	0	0	0	0	0	0
metI; D-methionine transport system permease protein	K02072	0	0	0	0	0	0	0	0	0	0	0	0	0	0	0	0	0	0	0	0	0	0	0	0	0	0	0	0	0	0	0	0	0	0	0	0	0	0	0	0	0	0	0	0	0	0	0	0
ABC.ZM.A; zinc/manganese transport system ATP-binding protein	K02074	0	0	0	0	0	0	0	0	0	0	0	0	2	0	0	0	0	0	0	0	0	0	0	0	0	0	0	0	0	0	0	0	0	0	0	0	0	0	1	0	0	0	0	0	0	0	0	0
ABC.ZM.P; zinc/manganese transport system permease protein	K02075	0	0	0	0	0	0	1	1	0	1	0	0	2	0	0	0	0	0	0	0	0	0	0	0	0	0	0	0	1	0	0	0	0	0	0	0	0	0	0	2	0	0	0	0	0	0	2	0
zurR, zur; Fur family transcriptional regulator, zinc uptake regulator	K02076	0	0	0	0	0	0	0	0	0	0	0	0	0	0	0	0	0	0	0	0	0	0	0	0	0	0	0	0	0	0	0	0	0	0	0	0	0	0	0	0	0	0	0	0	0	0	0	0
ABC.ZM.S; zinc/manganese transport system substrate-binding protein	K02077	0	0	0	1	0	0	1	2	0	2	0	0	2	0	0	0	1	0	0	0	0	0	0	1	0	0	0	0	1	0	0	0	1	0	0	0	0	0	1	1	0	0	0	0	0	0	1	0
acpP; acyl carrier protein	K02078	10	0	1	0	1	1	2	1	1	2	3	0	0	1	2	1	1	1	1	0	0	4	4	2	1	0	4	1	2	2	2	3	3	2	1	1	1	1	1	4	0	2	1	1	1	1	2	1
agaI; galactosamine-6-phosphate isomerase [EC:5.3.1.-]	K02080	0	0	0	0	0	0	0	0	0	0	0	0	0	0	0	0	0	0	0	0	0	0	0	0	0	0	0	0	0	0	0	0	0	0	0	0	0	1	0	0	0	0	0	0	0	0	0	0
agaR; DeoR family transcriptional regulator, aga operon transcriptional repressor	K02081	0	0	0	0	0	0	0	0	0	0	0	0	0	0	0	0	0	0	0	0	0	1	1	0	0	0	0	0	0	0	2	0	0	0	1	0	2	0	0	0	0	0	0	0	0	0	0	0
agaS; tagatose-6-phosphate ketose/aldose isomerase [EC:5.-.-.-]	K02082	0	0	0	0	0	0	0	0	0	0	0	0	0	0	0	0	0	0	0	0	0	0	0	0	0	0	0	0	0	0	0	0	0	0	0	0	0	0	0	0	0	0	0	0	0	0	0	0
allC; allantoate deiminase [EC:3.5.3.9]	K02083	0	0	0	0	0	0	0	0	0	0	0	0	0	0	0	0	0	0	0	0	0	0	0	0	0	0	0	0	0	0	0	0	0	0	0	0	0	0	0	0	0	0	0	0	0	0	0	0
CDK1, CDC2; cyclin-dependent kinase 1 [EC:2.7.11.22 2.7.11.23]	K02087	0	0	0	0	0	0	0	0	0	0	0	0	0	0	0	0	0	0	0	0	0	0	0	0	0	0	0	0	0	0	0	0	0	0	0	0	0	0	0	0	0	0	0	0	0	0	0	0
apcA; allophycocyanin alpha subunit	K02092	0	0	0	0	0	0	0	0	0	0	0	0	1	0	0	0	0	0	0	0	0	0	0	0	0	0	0	0	0	0	0	0	0	0	0	0	0	0	0	0	0	0	0	0	0	0	0	0
apcB; allophycocyanin beta subunit	K02093	0	0	0	0	0	0	0	0	0	0	0	0	1	0	0	0	0	0	0	0	0	0	0	0	0	0	0	0	0	0	0	0	0	0	0	0	0	0	0	0	0	0	0	0	0	0	0	0
apcC; phycobilisome core linker protein	K02094	0	0	0	0	0	0	0	0	0	0	0	0	1	0	0	0	0	0	0	0	0	0	0	0	0	0	0	0	0	0	0	0	0	0	0	0	0	0	0	0	0	0	0	0	0	0	0	0
apcD; allophycocyanin-B	K02095	0	0	0	0	0	0	0	0	0	0	0	0	2	0	0	0	0	0	0	0	0	0	0	0	0	0	0	0	0	0	0	0	0	0	0	0	0	0	0	0	0	0	0	0	0	0	0	0
apcE; phycobilisome core-membrane linker protein	K02096	0	0	0	0	0	0	0	0	0	0	0	0	1	0	0	0	0	0	0	0	0	0	0	0	0	0	0	0	0	0	0	0	0	0	0	0	0	0	0	0	0	0	0	0	0	0	0	0
apcF; phycobilisome core component	K02097	0	0	0	0	0	0	0	0	0	0	0	0	1	0	0	0	0	0	0	0	0	0	0	0	0	0	0	0	0	0	0	0	0	0	0	0	0	0	0	0	0	0	0	0	0	0	0	0
araC; AraC family transcriptional regulator, arabinose operon regulatory protein	K02099	0	1	0	0	0	3	0	0	0	0	0	0	0	0	0	0	0	0	0	0	0	0	0	0	0	1	0	0	0	0	0	0	0	0	0	0	1	0	0	0	0	0	0	0	0	0	0	0
araE; MFS transporter, SP family, arabinose:H+ symporter	K02100	1	0	0	0	0	0	0	0	0	0	0	0	0	0	0	0	0	0	0	0	0	4	2	0	0	0	0	0	0	0	0	0	0	0	0	0	0	0	0	1	0	0	0	0	0	0	0	0
araR; GntR family transcriptional regulator, arabinose operon transcriptional repressor	K02103	0	0	0	0	0	0	0	0	0	0	0	0	0	0	0	0	0	0	0	0	0	0	0	0	0	0	0	0	0	0	0	0	0	0	0	0	0	0	0	0	0	0	0	1	0	0	0	0
atoE; short-chain fatty acids transporter	K02106	0	0	0	0	0	0	0	0	0	0	0	0	0	0	0	0	0	0	0	0	0	0	0	0	0	0	0	0	0	0	0	0	0	0	0	0	0	0	0	0	0	0	0	0	0	0	0	0
ATPVG, ahaH, atpH; V/A-type H+/Na+-transporting ATPase subunit G/H	K02107	0	0	0	0	0	0	0	0	0	0	0	0	0	0	0	0	0	0	0	0	0	0	0	0	0	0	0	0	0	0	0	0	0	0	0	0	0	0	0	0	0	0	0	0	0	0	0	0
ATPF0A, atpB; F-type H+-transporting ATPase subunit a	K02108	4	0	1	1	1	1	1	2	2	1	0	1	1	3	0	2	0	1	1	0	1	1	1	1	0	1	1	1	1	1	2	1	2	0	0	0	0	0	1	2	1	1	0	1	1	0	0	0
ATPF0B, atpF; F-type H+-transporting ATPase subunit b	K02109	3	0	1	0	1	1	1	1	2	2	0	3	0	4	0	3	0	0	1	1	2	1	0	1	0	0	1	1	1	1	4	1	2	1	0	0	0	0	0	2	1	0	2	2	1	0	0	0
ATPF0C, atpE; F-type H+-transporting ATPase subunit c	K02110	3	0	1	1	1	1	1	1	2	1	0	2	1	2	0	2	0	1	1	1	1	0	0	1	0	2	1	1	1	1	2	1	2	1	0	0	0	0	1	2	1	0	0	1	1	1	0	0
ATPF1A, atpA; F-type H+/Na+-transporting ATPase subunit alpha [EC:7.1.2.2 7.2.2.1]	K02111	2	0	1	1	2	1	1	2	3	1	1	1	0	1	1	2	0	0	0	2	1	1	0	1	0	1	2	1	1	1	1	1	1	1	1	0	0	1	1	2	0	1	1	2	1	1	0	1
ATPF1B, atpD; F-type H+/Na+-transporting ATPase subunit beta [EC:7.1.2.2 7.2.2.1]	K02112	1	0	1	1	2	2	1	1	3	0	1	0	0	1	1	3	0	2	1	1	1	1	0	1	0	1	1	1	1	1	1	1	1	1	1	0	0	1	1	1	1	2	1	1	0	2	0	1
ATPF1D, atpH; F-type H+-transporting ATPase subunit delta	K02113	3	0	1	1	1	1	1	1	1	1	0	1	0	1	0	1	0	0	0	1	1	1	0	1	0	0	1	0	0	1	1	1	1	1	0	0	0	0	0	2	1	0	1	1	1	0	0	0
ATPF1E, atpC; F-type H+-transporting ATPase subunit epsilon	K02114	1	0	1	1	1	2	1	0	2	1	0	0	0	1	0	4	0	2	1	0	1	0	0	1	0	1	0	1	1	1	1	1	1	1	1	0	0	1	1	1	1	1	0	1	0	0	0	0
ATPF1G, atpG; F-type H+-transporting ATPase subunit gamma	K02115	3	0	1	0	1	1	1	1	3	0	1	0	0	1	1	2	0	0	0	1	1	1	0	1	0	1	1	1	1	1	1	1	1	1	0	0	0	1	1	1	0	1	1	1	0	0	0	1
atpI; ATP synthase protein I	K02116	0	0	0	0	0	0	1	0	1	0	0	1	1	2	1	2	0	0	0	0	1	0	0	1	0	0	0	1	0	0	1	0	1	0	0	0	0	0	1	0	0	0	0	1	0	0	0	0
ATPVA, ntpA, atpA; V/A-type H+/Na+-transporting ATPase subunit A [EC:7.1.2.2 7.2.2.1]	K02117	0	0	0	0	0	0	0	0	0	0	3	0	0	0	0	0	0	1	0	2	0	0	0	0	1	0	1	1	0	0	0	2	0	1	0	2	1	0	0	1	0	1	0	0	1	1	2	0
ATPVB, ntpB, atpB; V/A-type H+/Na+-transporting ATPase subunit B	K02118	0	0	0	0	0	0	0	0	0	0	2	0	0	0	0	0	0	1	0	1	0	0	0	0	1	1	1	1	0	0	0	1	0	2	0	2	1	0	0	1	0	0	0	0	1	1	2	0
ATPVC, ntpC, atpC; V/A-type H+/Na+-transporting ATPase subunit C	K02119	0	0	0	0	0	0	0	0	0	0	0	0	0	0	0	0	1	0	0	0	0	0	0	0	0	0	0	1	0	0	0	0	0	0	0	1	0	0	0	0	0	0	0	0	0	0	1	0
ATPVD, ntpD, atpD; V/A-type H+/Na+-transporting ATPase subunit D	K02120	0	0	0	0	0	0	0	0	0	0	2	0	0	0	0	0	0	0	0	1	0	0	0	0	0	1	1	1	0	0	0	1	0	1	0	3	1	0	0	1	0	0	0	0	0	1	3	0
ATPVE, ntpE, atpE; V/A-type H+/Na+-transporting ATPase subunit E	K02121	0	0	0	0	0	0	0	0	0	0	1	0	0	0	0	0	0	0	0	0	0	0	0	0	0	0	1	0	0	0	0	1	0	0	0	0	1	0	0	1	0	1	0	0	0	1	0	0
ATPVF, ntpF, atpF; V/A-type H+/Na+-transporting ATPase subunit F	K02122	0	0	0	0	0	0	0	0	0	0	0	0	0	0	0	0	0	0	0	0	0	0	0	0	0	0	0	0	0	0	0	0	0	0	0	0	0	0	0	0	0	0	0	0	1	0	1	0
ATPVI, ntpI, atpI; V/A-type H+/Na+-transporting ATPase subunit I	K02123	0	0	0	0	0	0	0	0	0	0	1	0	0	0	0	0	0	0	0	1	0	0	0	0	1	1	2	1	0	0	0	2	0	1	0	2	1	0	0	1	0	1	0	1	0	1	3	0
ATPVK, ntpK, atpK; V/A-type H+/Na+-transporting ATPase subunit K	K02124	0	0	0	0	0	0	0	0	0	0	1	0	0	0	0	0	0	0	0	0	0	0	0	0	0	0	1	1	0	0	0	1	0	1	0	2	1	0	0	2	0	1	0	0	0	1	2	0
ATPeF0A, MTATP6, ATP6; F-type H+-transporting ATPase subunit a	K02126	0	0	0	0	0	0	0	0	0	0	0	0	0	0	0	0	0	0	0	0	0	0	0	0	0	0	0	0	0	0	0	0	0	0	0	0	0	0	0	0	0	0	0	0	0	0	0	0
ATPeF0C, ATP5G, ATP9; F-type H+-transporting ATPase subunit c	K02128	0	0	0	0	0	0	0	0	0	0	0	0	0	0	0	0	0	0	0	0	0	0	0	0	0	0	0	0	0	0	0	0	0	0	0	0	0	0	0	0	0	0	0	0	0	0	0	0
ATPeF1D, ATP5D, ATP16; F-type H+-transporting ATPase subunit delta	K02134	0	0	0	0	0	0	0	0	0	0	0	0	0	0	0	0	0	0	0	0	0	0	0	0	0	0	0	0	0	0	0	0	0	0	0	0	0	0	0	0	0	0	0	0	0	0	0	0
ATPeF1G, ATP5C1, ATP3; F-type H+-transporting ATPase subunit gamma	K02136	0	0	0	0	0	0	0	0	0	0	0	0	0	0	0	0	0	0	0	0	0	0	0	0	0	0	0	0	0	0	0	0	0	0	0	0	0	0	0	0	0	0	0	0	0	0	0	0
ATPeF0O, ATP5O, ATP5; F-type H+-transporting ATPase subunit O	K02137	0	0	0	0	0	0	0	0	0	0	0	0	0	0	0	0	0	0	0	0	0	0	0	0	0	0	0	0	0	0	0	0	0	0	0	0	0	0	0	0	0	0	0	0	0	0	0	0
ATPeV0D, ATP6D; V-type H+-transporting ATPase subunit d	K02146	0	0	0	0	0	0	0	0	0	0	0	0	0	0	0	0	0	0	0	0	0	0	0	0	0	0	0	0	0	0	0	0	0	0	0	0	0	0	0	0	0	0	0	0	0	0	0	0
ATPeV1C, ATP6C; V-type H+-transporting ATPase subunit C	K02148	0	0	0	0	0	0	0	0	0	0	0	0	0	0	0	0	0	0	0	0	0	0	0	0	0	0	0	0	0	0	0	0	0	0	0	0	0	0	0	0	0	0	0	0	0	0	0	0
ATPeV1D, ATP6M; V-type H+-transporting ATPase subunit D	K02149	0	0	0	0	0	0	0	0	0	0	0	0	0	0	0	0	0	0	0	0	0	0	0	0	0	0	0	0	0	0	0	0	0	0	0	0	0	0	0	0	0	0	0	0	0	0	0	0
ATPeV1E, ATP6E; V-type H+-transporting ATPase subunit E	K02150	0	0	0	0	0	0	0	0	0	0	0	0	0	0	0	0	0	0	0	0	0	0	0	0	0	0	0	0	0	0	0	0	0	0	0	0	0	0	0	0	0	0	0	0	0	0	0	0
ATPeV1F, ATP6S14; V-type H+-transporting ATPase subunit F	K02151	0	0	0	0	0	0	0	0	0	0	0	0	0	0	0	0	0	0	0	0	0	0	0	0	0	0	0	0	0	0	0	0	0	0	0	0	0	0	0	0	0	0	0	0	0	0	0	0
ATPeV0A, ATP6N; V-type H+-transporting ATPase subunit a	K02154	0	0	0	0	0	0	0	0	0	0	0	0	0	0	0	0	0	0	0	0	0	0	0	0	0	0	0	0	0	0	0	0	0	0	0	0	0	0	0	0	0	0	0	0	0	0	0	0
ATPeV0C, ATP6L; V-type H+-transporting ATPase 16kDa proteolipid subunit	K02155	0	0	0	0	0	0	0	0	0	0	0	0	0	0	0	0	0	0	0	0	0	0	0	0	0	0	0	0	0	0	0	0	0	0	0	0	0	0	0	0	0	0	0	0	0	0	0	0
accB, bccP; acetyl-CoA carboxylase biotin carboxyl carrier protein	K02160	3	0	1	0	1	1	0	0	1	2	0	0	1	0	2	0	0	0	0	0	0	0	1	0	0	0	1	1	0	1	3	0	2	1	0	1	0	0	0	0	0	0	2	2	0	1	2	0
norE; nitric oxide reductase NorE protein	K02164	0	0	0	0	0	0	0	0	0	0	0	0	0	0	0	0	0	0	0	0	0	0	0	0	0	0	0	0	0	0	0	0	0	0	0	0	0	0	0	0	0	0	0	0	0	0	0	0
betI; TetR/AcrR family transcriptional regulator, transcriptional repressor of bet genes	K02167	0	0	0	0	0	0	0	0	0	0	0	0	0	0	0	0	0	0	0	0	0	0	0	0	0	0	0	0	0	0	0	0	0	0	0	0	0	0	0	0	0	0	0	0	0	0	0	0
betT, betS; choline/glycine/proline betaine transport protein	K02168	0	0	0	0	0	0	0	0	0	0	0	0	0	0	0	0	0	0	0	0	0	0	0	0	0	0	0	0	0	0	0	0	0	0	0	0	0	0	0	0	0	0	0	0	0	0	1	0
bioC; malonyl-CoA O-methyltransferase [EC:2.1.1.197]	K02169	0	0	1	0	0	0	1	0	0	0	0	0	1	0	0	2	1	0	0	0	1	0	0	0	0	0	0	0	0	0	0	0	0	0	0	0	0	0	0	0	0	0	0	0	0	0	1	0
bioH; pimeloyl-[acyl-carrier protein] methyl ester esterase [EC:3.1.1.85]	K02170	0	0	0	0	0	0	0	0	0	0	0	0	0	0	0	0	1	0	0	0	0	0	0	0	0	0	0	0	0	0	0	0	0	0	0	0	0	0	0	0	0	0	0	0	0	0	0	0
blaI; BlaI family transcriptional regulator, penicillinase repressor	K02171	0	0	0	0	0	0	0	1	1	0	0	0	0	0	0	0	0	0	0	1	0	1	3	0	0	0	1	0	0	0	0	0	0	0	0	2	0	0	0	0	0	0	0	0	0	0	11	0
blaR1; bla regulator protein blaR1	K02172	0	0	0	0	0	0	0	0	0	0	0	0	0	0	0	0	0	0	0	0	0	0	0	0	0	0	0	0	0	0	0	0	0	0	0	0	0	0	0	0	0	0	0	0	0	0	1	0
yggC; putative kinase	K02173	0	0	0	0	0	0	0	0	0	0	0	0	0	0	0	0	0	0	0	0	0	0	0	0	0	0	0	0	0	0	0	0	0	0	0	0	2	0	0	0	0	0	0	0	0	0	0	0
caiC; carnitine-CoA ligase [EC:6.2.1.48]	K02182	0	0	0	0	0	0	0	0	0	0	0	0	0	0	0	0	0	0	1	0	0	0	0	0	0	0	0	0	0	0	0	0	4	0	0	0	0	0	0	0	0	0	0	4	1	0	0	3
CALM; calmodulin	K02183	0	0	0	0	0	0	0	0	0	0	0	0	0	0	0	0	0	0	0	0	0	0	0	0	0	0	0	0	0	0	0	0	0	0	0	0	0	0	0	0	0	0	0	0	0	0	0	0
cbiD; cobalt-precorrin-5B (C1)-methyltransferase [EC:2.1.1.195]	K02188	0	0	0	0	0	0	0	0	0	1	0	0	1	0	0	0	0	0	0	0	0	0	0	1	0	0	0	0	0	0	0	0	1	0	0	0	0	0	0	0	0	0	0	0	0	0	0	0
cbiG; cobalt-precorrin 5A hydrolase [EC:3.7.1.12]	K02189	0	0	0	0	0	0	0	0	0	0	0	0	0	0	0	0	0	0	0	0	0	0	0	1	0	0	0	0	0	0	0	0	1	0	0	0	0	0	0	0	0	0	0	0	0	0	0	0
cbiK; sirohydrochlorin cobaltochelatase [EC:4.99.1.3]	K02190	0	0	0	0	0	0	0	0	0	0	0	1	0	2	0	0	0	0	1	0	0	0	0	0	0	0	0	0	0	0	0	0	1	0	0	0	0	0	0	0	0	0	0	0	0	0	0	0
cbiT; cobalt-precorrin-6B (C15)-methyltransferase [EC:2.1.1.196]	K02191	0	0	0	0	0	0	0	0	0	0	0	0	1	0	0	0	0	0	0	0	0	0	0	0	0	0	0	0	0	0	0	0	0	0	0	0	0	0	0	0	0	0	0	0	0	0	0	0
bfd; bacterioferritin-associated ferredoxin	K02192	0	0	0	0	0	0	0	0	0	0	0	0	0	0	0	0	0	0	0	0	0	0	0	0	0	0	0	0	0	0	0	0	0	0	0	0	0	0	0	0	0	0	0	0	0	0	0	0
ccmA; heme exporter protein A [EC:3.6.3.41]	K02193	0	0	0	0	0	0	1	1	0	1	0	0	0	0	0	0	0	0	1	0	0	1	0	0	0	0	0	0	1	1	0	0	0	1	0	1	0	0	0	0	0	0	0	0	0	0	0	0
ccmB; heme exporter protein B	K02194	0	0	0	1	0	0	1	1	0	1	0	0	0	0	0	0	0	0	1	0	0	1	0	0	0	0	0	0	1	1	0	0	0	1	1	1	0	0	0	0	0	0	0	0	0	0	0	0
ccmC; heme exporter protein C	K02195	0	0	0	1	0	0	1	1	0	2	0	0	0	0	0	0	0	0	1	0	0	1	0	0	0	0	0	0	1	1	0	0	0	1	1	1	0	0	0	0	0	0	0	0	0	0	0	0
ccmD; heme exporter protein D	K02196	0	0	0	0	0	0	0	0	0	0	0	0	0	0	0	0	0	0	0	0	0	0	0	0	0	0	0	0	0	0	0	0	0	0	0	0	0	0	0	0	0	0	0	0	0	0	0	0
ccmE; cytochrome c-type biogenesis protein CcmE	K02197	0	0	0	1	0	0	1	1	0	1	0	0	0	0	0	0	0	0	1	0	0	1	0	0	0	0	0	0	1	1	0	0	0	1	0	1	0	0	0	0	0	0	0	0	0	0	0	0
ccmF; cytochrome c-type biogenesis protein CcmF	K02198	0	0	0	1	0	0	1	1	0	1	0	1	0	0	0	0	0	0	0	0	0	1	0	0	0	0	0	0	1	1	0	0	0	1	1	0	0	0	0	0	0	0	0	1	0	0	0	0
ccmG, dsbE; cytochrome c biogenesis protein CcmG, thiol:disulfide interchange protein DsbE	K02199	0	1	0	0	0	0	1	0	0	1	0	0	0	0	0	0	0	0	1	0	0	0	0	0	0	0	0	1	1	1	0	0	1	0	1	0	0	0	0	0	0	0	0	0	0	0	0	0
ccmH; cytochrome c-type biogenesis protein CcmH	K02200	0	0	0	0	0	0	2	0	0	2	0	0	0	0	0	0	0	0	1	0	0	0	0	0	0	0	0	0	0	1	0	0	0	0	1	0	0	0	0	0	0	0	0	0	0	0	0	0
E2.7.7.3B; pantetheine-phosphate adenylyltransferase [EC:2.7.7.3]	K02201	0	0	0	0	0	0	0	0	0	0	0	0	0	0	0	0	0	0	0	0	0	0	0	0	0	0	0	0	0	0	0	0	0	0	0	0	0	0	0	0	0	0	0	0	0	0	0	0
thrH; phosphoserine / homoserine phosphotransferase [EC:3.1.3.3 2.7.1.39]	K02203	0	0	0	0	0	0	1	0	0	0	0	1	0	1	0	0	0	0	1	0	1	0	0	0	0	0	0	0	0	0	0	1	0	0	0	0	1	0	0	0	0	1	0	1	0	0	0	0
thrB2; homoserine kinase type II [EC:2.7.1.39]	K02204	0	0	0	0	0	0	0	0	1	0	0	0	0	1	0	0	0	1	2	0	0	0	0	0	0	0	1	0	0	0	0	0	0	0	1	1	0	0	0	0	0	0	0	0	0	0	0	0
CDK2; cyclin-dependent kinase 2 [EC:2.7.11.22]	K02206	0	0	0	0	0	0	0	0	0	0	0	0	0	0	0	0	0	0	0	0	0	0	0	0	0	0	0	0	0	0	0	0	0	0	0	0	0	0	0	0	0	0	0	0	0	0	0	0
MCM7, CDC47; DNA replication licensing factor MCM7 [EC:3.6.4.12]	K02210	0	0	0	0	0	0	0	0	0	0	0	0	0	0	0	0	0	0	0	0	0	0	0	0	0	0	0	0	0	0	0	0	0	0	0	0	0	0	0	0	0	0	0	0	0	0	0	0
ftnA, ftn; ferritin [EC:1.16.3.2]	K02217	4	0	0	0	0	0	0	1	1	1	0	0	2	0	0	1	0	0	0	0	0	1	0	1	0	0	1	0	0	0	0	1	0	2	0	1	1	0	0	0	0	1	0	0	0	1	1	0
CSNK1, CKI; casein kinase 1 [EC:2.7.11.1]	K02218	0	0	0	0	0	0	0	0	0	0	0	0	0	0	0	0	0	0	0	0	0	0	0	0	0	0	0	0	0	0	0	0	0	0	0	0	0	0	0	0	0	0	0	0	0	0	0	0
yggT; YggT family protein	K02221	0	0	0	0	0	0	1	0	0	1	0	0	1	1	0	1	0	0	0	1	1	0	0	0	0	0	0	1	0	0	1	0	1	1	0	0	1	0	1	0	1	0	1	1	0	0	0	1
cobB-cbiA; cobyrinic acid a,c-diamide synthase [EC:6.3.5.9 6.3.5.11]	K02224	0	0	0	0	0	0	1	0	0	1	0	1	1	1	1	1	0	0	2	1	1	1	1	1	0	0	3	0	0	0	1	0	2	2	0	0	0	0	0	0	0	0	1	1	2	0	0	0
cobC1, cobC; cobalamin biosynthetic protein CobC	K02225	0	0	0	0	0	0	0	0	0	0	0	0	0	0	0	0	0	0	0	0	0	0	0	0	0	0	0	0	0	0	0	0	0	0	0	0	0	0	0	0	0	0	0	0	0	0	0	0
cobC, phpB; alpha-ribazole phosphatase [EC:3.1.3.73]	K02226	0	0	0	0	2	0	1	0	0	0	0	0	0	1	0	0	0	0	0	0	0	1	0	0	0	0	0	0	0	0	0	0	0	1	0	0	1	1	0	0	1	0	1	0	1	0	0	0
cbiB, cobD; adenosylcobinamide-phosphate synthase [EC:6.3.1.10]	K02227	0	0	0	0	1	0	1	0	0	0	0	0	1	1	0	1	0	0	0	0	0	0	0	1	0	0	0	0	0	0	0	0	1	1	0	0	1	0	0	0	1	0	0	0	0	0	0	0
cobF; precorrin-6A synthase [EC:2.1.1.152]	K02228	0	0	0	0	0	0	0	0	0	0	0	0	0	0	0	0	0	0	0	0	0	0	0	0	0	0	0	0	0	0	0	0	0	0	0	0	0	0	0	0	0	0	0	0	0	0	0	0
cobG; precorrin-3B synthase [EC:1.14.13.83]	K02229	0	0	0	0	0	0	0	0	0	0	0	0	0	0	0	0	0	0	0	0	0	0	0	0	0	0	0	0	0	0	0	0	0	0	0	0	0	0	0	0	0	0	0	0	0	0	0	0
cobN; cobaltochelatase CobN [EC:6.6.1.2]	K02230	0	0	0	0	2	0	0	0	0	0	0	0	0	0	0	0	0	0	0	0	0	0	1	1	0	0	0	0	0	0	0	0	0	0	0	0	0	0	0	0	0	0	0	0	0	0	0	0
cobP, cobU; adenosylcobinamide kinase / adenosylcobinamide-phosphate guanylyltransferase [EC:2.7.1.156 2.7.7.62]	K02231	0	0	0	0	1	0	0	0	0	0	0	0	1	1	1	1	0	0	1	0	1	0	0	1	0	0	0	0	0	0	0	0	1	1	0	0	1	1	0	0	1	0	0	0	0	0	0	0
cobQ, cbiP; adenosylcobyric acid synthase [EC:6.3.5.10]	K02232	0	0	0	0	1	0	1	0	0	0	0	0	1	1	0	0	0	0	0	0	0	0	0	0	0	1	0	0	0	0	0	0	1	1	0	0	0	0	0	0	1	0	0	0	1	0	0	0
E2.7.8.26, cobS, cobV; adenosylcobinamide-GDP ribazoletransferase [EC:2.7.8.26]	K02233	0	0	0	0	1	0	1	0	0	0	0	0	1	1	0	1	0	0	1	0	1	0	0	0	0	1	0	0	0	0	0	0	1	1	0	0	1	1	0	0	1	0	1	0	0	0	0	0
cobW; cobalamin biosynthesis protein CobW	K02234	0	0	0	0	0	0	0	0	0	0	0	0	1	0	0	0	0	0	0	0	0	0	0	0	0	0	0	0	0	0	0	0	0	0	0	0	0	0	0	0	0	0	0	0	0	0	0	0
comC; leader peptidase (prepilin peptidase) / N-methyltransferase [EC:3.4.23.43 2.1.1.-]	K02236	0	0	0	0	0	0	0	0	0	0	0	0	0	0	0	0	0	0	0	0	0	0	0	0	0	0	0	0	0	0	0	0	0	0	0	0	0	0	0	0	0	0	0	0	0	0	0	0
comEA; competence protein ComEA	K02237	0	0	0	0	0	0	0	0	1	0	0	0	0	1	0	1	0	0	0	1	1	1	0	0	0	0	0	1	0	0	2	0	1	0	0	0	0	0	1	0	1	0	1	1	0	1	0	0
comEC; competence protein ComEC	K02238	4	2	1	1	1	1	1	1	1	1	0	1	1	1	1	1	2	2	1	2	1	2	1	2	0	1	0	1	2	1	3	1	1	3	1	1	0	1	2	1	0	1	0	1	1	2	0	0
comER; competence protein ComER	K02239	0	0	0	0	0	0	0	0	0	0	0	0	0	0	0	0	0	0	0	0	0	0	0	0	0	0	0	0	0	0	0	0	0	0	0	0	0	0	0	0	0	0	0	0	0	0	0	0
comFB; competence protein ComFB	K02241	0	0	0	0	0	0	0	0	0	0	0	0	0	0	0	0	0	0	0	0	0	0	0	0	0	0	0	0	0	0	0	0	0	0	0	0	0	0	0	0	0	0	0	0	0	1	0	0
comFC; competence protein ComFC	K02242	0	0	0	0	1	0	0	0	0	0	0	0	0	0	0	0	0	0	0	0	0	0	0	0	0	0	0	0	0	0	0	0	0	0	0	0	0	0	0	0	0	0	0	0	0	0	0	0
comGC; competence protein ComGC	K02245	0	0	0	0	0	0	0	0	0	0	0	0	0	0	0	0	0	0	0	0	0	0	0	0	0	0	0	0	0	0	0	0	0	0	0	0	0	0	0	0	0	0	0	0	0	0	0	0
COX1; cytochrome c oxidase subunit 1 [EC:1.9.3.1]	K02256	0	0	0	0	0	0	0	0	0	0	0	0	0	0	0	0	0	0	0	0	0	0	0	0	0	0	0	0	0	0	0	0	0	0	0	0	0	0	0	0	0	0	0	0	0	0	0	0
COX10, ctaB, cyoE; heme o synthase [EC:2.5.1.141]	K02257	0	0	0	0	0	0	0	0	0	0	0	0	0	0	0	0	0	0	0	0	0	0	0	0	0	0	0	0	0	0	0	0	0	0	0	0	0	0	0	0	0	0	0	0	0	0	0	0
COX11, ctaG; cytochrome c oxidase assembly protein subunit 11	K02258	0	0	0	0	0	0	0	0	0	0	0	0	0	0	0	0	0	0	0	0	0	0	0	0	0	0	0	0	0	0	0	0	0	0	0	0	0	0	0	0	0	0	0	0	0	0	0	0
COX15, ctaA; cytochrome c oxidase assembly protein subunit 15	K02259	4	0	0	1	1	1	0	1	1	0	0	0	1	0	0	0	0	1	0	0	0	1	1	0	0	0	1	0	0	0	0	0	0	0	0	0	0	0	1	0	0	0	0	0	0	0	0	0
COX2; cytochrome c oxidase subunit 2	K02261	0	0	0	0	0	0	0	0	0	0	0	0	0	0	0	0	0	0	0	0	0	0	0	0	0	0	0	0	0	0	0	0	0	0	0	0	0	0	0	0	0	0	0	0	0	0	0	0
COX3; cytochrome c oxidase subunit 3	K02262	0	0	0	0	0	0	0	0	0	0	0	0	0	0	0	0	0	0	0	0	0	0	0	0	0	0	0	0	0	0	0	0	0	0	0	0	0	0	0	0	0	0	0	0	0	0	0	0
COX5B; cytochrome c oxidase subunit 5b	K02265	0	0	0	0	0	0	0	0	0	0	0	0	0	0	0	0	0	0	0	0	0	0	0	0	0	0	0	0	0	0	0	0	0	0	0	0	0	0	0	0	0	0	0	0	0	0	0	0
coxA, ctaD; cytochrome c oxidase subunit I [EC:1.9.3.1]	K02274	3	0	2	1	1	1	0	2	2	2	0	0	2	1	0	0	0	0	0	0	0	1	0	0	0	0	0	0	1	0	0	1	0	0	0	0	0	0	2	1	0	2	0	0	0	0	0	0
coxB, ctaC; cytochrome c oxidase subunit II [EC:1.9.3.1]	K02275	2	0	2	1	1	1	0	3	1	2	0	0	2	1	0	0	0	0	0	0	0	1	0	0	0	0	0	0	1	0	0	1	0	0	1	0	0	0	3	0	0	2	0	0	0	0	0	0
coxC, ctaE; cytochrome c oxidase subunit III [EC:1.9.3.1]	K02276	4	0	2	1	2	0	0	2	1	3	0	0	2	1	0	0	0	0	0	0	0	1	1	0	0	0	0	0	1	0	0	0	0	0	0	0	0	0	1	0	0	1	0	0	0	0	0	0
coxD, ctaF; cytochrome c oxidase subunit IV [EC:1.9.3.1]	K02277	0	1	1	0	1	1	0	0	1	1	0	0	0	1	0	0	0	0	0	0	0	1	1	0	0	0	0	0	1	0	0	0	0	0	0	0	0	0	0	0	0	1	0	0	0	0	0	0
cpaA, tadV; prepilin peptidase CpaA [EC:3.4.23.43]	K02278	0	0	0	0	2	1	0	0	3	1	0	0	0	0	0	0	1	1	0	0	0	2	2	0	0	0	2	0	0	0	0	0	0	0	0	0	0	0	0	0	0	0	0	0	0	0	0	0
cpaB, rcpC; pilus assembly protein CpaB	K02279	0	0	0	0	1	1	0	0	3	2	0	0	0	0	0	0	1	1	0	0	0	1	1	0	0	0	1	0	0	0	0	0	0	0	0	0	0	0	0	0	0	0	0	0	0	0	0	0
cpaC, rcpA; pilus assembly protein CpaC	K02280	0	0	0	0	3	1	0	0	4	0	0	0	0	0	0	0	0	0	0	0	0	1	1	0	1	0	2	0	0	0	0	0	0	0	0	0	0	0	0	0	0	0	0	0	0	0	0	0
cpaD; pilus assembly protein CpaD	K02281	0	0	0	0	0	0	0	0	0	0	0	0	0	0	0	0	0	0	0	0	0	0	0	0	0	0	0	0	0	0	0	0	0	0	0	0	0	0	0	0	0	0	0	0	0	0	0	0
cpaE, tadZ; pilus assembly protein CpaE	K02282	0	0	0	0	2	0	0	0	2	0	0	0	0	0	0	0	0	0	0	0	0	1	1	0	0	0	2	0	0	0	0	0	0	0	3	0	0	0	0	0	0	0	0	0	0	0	0	0
cpaF, tadA; pilus assembly protein CpaF	K02283	0	0	0	0	2	1	0	0	5	2	0	0	0	0	0	0	1	2	0	0	0	4	2	3	0	0	2	0	0	0	0	0	0	0	2	0	0	0	2	0	0	0	1	0	0	0	0	0
cpcA; phycocyanin alpha chain	K02284	0	0	0	0	0	0	0	0	0	0	0	0	1	0	0	0	0	0	0	0	0	0	0	0	0	0	0	0	0	0	0	0	0	0	0	0	0	0	0	0	0	0	0	0	0	0	0	0
cpcB; phycocyanin beta chain	K02285	0	0	0	0	0	0	0	0	0	0	0	0	3	0	0	0	0	0	0	0	0	0	0	0	0	0	0	0	0	0	0	0	0	0	0	0	0	0	0	0	0	0	0	0	0	0	0	0
cpcE; phycocyanobilin lyase subunit alpha [EC:4.4.1.32]	K02288	0	0	0	0	0	0	0	0	0	0	0	0	1	0	0	0	0	0	0	0	0	0	0	0	0	0	0	0	0	0	0	0	0	0	0	0	0	0	0	0	0	0	0	0	0	0	0	0
cpcF; phycocyanobilin lyase subunit beta [EC:4.4.1.32]	K02289	0	0	0	0	0	0	0	0	0	0	0	0	1	0	0	0	0	0	0	0	0	0	0	0	0	0	0	0	0	0	0	0	0	0	0	0	0	0	0	0	0	0	0	0	0	0	0	0
cpcG; phycobilisome rod-core linker protein	K02290	0	0	0	0	0	0	0	0	0	0	0	0	0	0	0	0	0	0	0	0	0	0	0	0	0	0	0	0	0	0	0	0	0	0	0	0	0	0	0	0	0	0	0	0	0	0	0	0
crtB; 15-cis-phytoene synthase [EC:2.5.1.32]	K02291	0	0	1	2	1	1	0	0	1	0	0	0	1	0	0	0	0	0	0	0	0	0	0	1	0	0	0	0	0	0	0	0	0	0	0	0	0	0	1	0	0	1	0	0	0	0	0	0
crtO; beta-carotene ketolase (CrtO type)	K02292	0	0	0	0	0	0	0	0	0	0	0	0	0	0	0	0	0	0	0	0	0	0	0	0	0	0	0	0	0	0	0	0	0	2	0	0	0	0	0	0	0	0	0	0	0	0	0	0
PDS, crtP; 15-cis-phytoene desaturase [EC:1.3.5.5]	K02293	0	0	0	0	0	0	0	0	0	0	0	0	1	0	0	0	0	0	0	0	0	0	0	0	0	0	0	0	0	0	0	0	0	0	0	0	0	0	0	0	0	0	0	0	0	0	0	0
crtR; beta-carotene hydroxylase [EC:1.14.13.-]	K02294	0	0	0	0	0	0	0	0	0	0	0	0	1	0	0	0	0	0	0	0	0	0	0	0	0	0	0	0	0	0	0	0	0	0	0	0	0	0	0	0	0	0	0	0	0	0	0	0
CRY; cryptochrome	K02295	0	0	0	0	0	0	0	0	0	0	0	0	0	0	0	0	0	0	0	0	0	0	0	0	0	0	0	0	0	0	0	0	0	0	0	0	0	0	0	0	0	0	0	0	0	0	0	0
cyoA; cytochrome o ubiquinol oxidase subunit II [EC:7.1.1.3]	K02297	0	0	0	0	0	0	0	0	0	0	0	0	0	0	0	0	0	0	0	0	0	0	0	0	0	0	0	0	0	0	0	0	0	0	0	0	0	0	0	0	0	0	0	0	0	0	0	0
cyoB; cytochrome o ubiquinol oxidase subunit I [EC:7.1.1.3]	K02298	0	0	0	0	0	0	0	0	0	0	0	0	0	0	0	0	0	0	0	0	0	0	0	0	0	0	0	0	0	0	0	0	0	0	0	0	0	0	0	0	0	0	0	0	0	0	0	0
cyoC; cytochrome o ubiquinol oxidase subunit III	K02299	0	0	0	0	0	1	0	0	0	1	0	0	0	0	0	0	0	0	0	0	0	0	0	0	0	0	0	0	0	0	0	0	0	0	0	0	0	0	0	0	0	0	0	0	0	0	0	0
cyoD; cytochrome o ubiquinol oxidase subunit IV	K02300	0	0	0	0	0	0	0	0	0	0	0	0	0	0	0	0	0	0	0	0	0	0	0	0	0	0	0	0	0	0	0	0	0	0	0	0	0	0	0	0	0	0	0	0	0	0	0	0
cyoE; protoheme IX farnesyltransferase [EC:2.5.1.-]	K02301	2	0	1	2	1	1	0	1	1	1	0	0	1	1	0	1	0	1	0	0	0	0	1	0	0	0	0	0	2	0	0	0	0	1	1	0	0	0	2	0	1	1	0	0	0	0	0	0
cysG; uroporphyrin-III C-methyltransferase / precorrin-2 dehydrogenase / sirohydrochlorin ferrochelatase [EC:2.1.1.107 1.3.1.76 4.99.1.4]	K02302	0	0	0	0	0	0	0	0	0	0	0	0	0	0	0	0	0	0	0	0	0	0	1	0	0	0	2	0	0	0	0	0	0	0	0	0	0	0	0	0	0	0	0	0	0	0	0	0
cobA; uroporphyrin-III C-methyltransferase [EC:2.1.1.107]	K02303	3	0	0	0	0	1	0	0	0	0	0	0	1	0	0	0	0	0	0	0	0	0	0	0	0	0	0	0	0	0	0	0	0	0	0	0	0	0	0	0	0	0	0	0	0	1	0	0
MET8; precorrin-2 dehydrogenase / sirohydrochlorin ferrochelatase [EC:1.3.1.76 4.99.1.4]	K02304	1	0	0	0	0	0	1	0	0	0	1	1	0	1	0	1	0	0	0	1	0	0	0	0	0	0	0	0	0	0	1	0	0	1	0	0	0	1	0	0	0	0	1	1	1	1	2	0
norC; nitric oxide reductase subunit C	K02305	0	0	0	0	0	0	0	0	0	0	0	0	0	0	0	0	0	0	0	0	0	0	0	0	0	0	0	0	0	0	0	0	0	0	0	0	0	0	0	0	0	0	0	0	0	0	0	0
dnaA; chromosomal replication initiator protein	K02313	4	0	0	1	3	2	2	1	2	2	0	1	0	1	0	1	0	2	0	1	1	3	2	1	2	1	3	2	0	1	2	1	2	1	0	2	1	1	0	1	1	1	0	2	2	1	2	1
dnaB; replicative DNA helicase [EC:3.6.4.12]	K02314	2	0	1	1	1	1	1	0	2	2	0	0	1	1	0	1	0	0	1	1	1	2	2	1	1	3	4	1	2	2	2	1	1	1	3	1	1	1	1	2	1	1	1	2	1	3	1	0
dnaC; DNA replication protein DnaC	K02315	0	0	0	1	0	0	1	0	0	1	0	0	0	0	0	0	0	1	0	0	0	0	0	0	0	0	0	1	0	0	0	0	0	1	1	0	0	0	0	0	1	0	0	0	0	0	0	0
dnaG; DNA primase [EC:2.7.7.101]	K02316	3	1	1	1	1	1	1	1	1	1	1	1	1	2	1	2	0	0	0	1	1	0	1	2	0	0	2	1	1	0	1	3	2	1	1	1	1	1	1	2	1	1	1	1	1	2	1	1
COASY; phosphopantetheine adenylyltransferase / dephospho-CoA kinase [EC:2.7.7.3 2.7.1.24]	K02318	0	0	0	0	0	0	0	0	0	0	0	0	0	0	0	0	0	0	0	0	0	0	0	0	0	0	0	0	0	0	1	0	0	0	0	0	0	0	0	0	0	0	0	0	0	0	0	0
pol; DNA polymerase, archaea type [EC:2.7.7.7]	K02319	0	0	0	0	0	0	0	0	0	0	0	0	0	0	0	0	0	0	0	0	0	0	0	0	0	0	0	0	0	0	0	0	0	0	0	0	0	0	0	0	0	0	0	0	0	0	0	0
POLA1; DNA polymerase alpha subunit A [EC:2.7.7.7]	K02320	0	0	0	0	0	0	0	0	0	0	0	0	0	0	0	0	0	0	0	0	0	0	0	0	0	0	0	0	0	0	0	0	0	0	0	0	0	0	0	0	0	0	0	0	0	0	0	0
polC; DNA polymerase II large subunit [EC:2.7.7.7]	K02322	0	0	0	0	0	0	0	0	0	0	0	0	0	0	0	0	0	0	0	0	0	0	0	0	0	0	0	0	0	0	0	0	0	0	0	0	0	0	0	0	0	0	0	0	0	0	0	0
polB; DNA polymerase II small subunit [EC:2.7.7.7]	K02323	0	0	0	0	0	0	0	0	0	0	0	0	0	0	0	0	0	0	0	0	0	0	0	0	0	0	0	0	0	0	0	0	0	0	0	0	0	0	0	0	0	0	0	0	0	0	0	0
POLE; DNA polymerase epsilon subunit 1 [EC:2.7.7.7]	K02324	0	0	0	0	0	0	0	0	0	0	0	0	0	0	0	0	0	0	0	0	0	0	0	0	0	0	0	0	0	0	0	0	0	0	0	0	0	0	0	0	0	0	0	0	0	0	0	0
POLE2; DNA polymerase epsilon subunit 2 [EC:2.7.7.7]	K02325	0	0	0	0	0	0	0	0	0	0	0	0	0	0	0	0	0	0	0	0	0	0	0	0	0	0	0	0	0	0	0	0	0	0	0	0	0	0	0	0	0	0	0	0	0	0	0	0
POLD1; DNA polymerase delta subunit 1 [EC:2.7.7.7]	K02327	0	0	0	0	0	0	0	0	0	0	0	0	0	0	0	0	0	0	0	0	0	0	0	0	0	0	0	0	0	0	0	0	0	0	0	0	0	0	0	0	0	0	0	0	0	0	0	0
POLB; DNA polymerase beta [EC:2.7.7.7 4.2.99.-]	K02330	0	0	0	0	0	0	0	0	0	0	0	0	0	0	0	0	0	0	0	0	0	0	0	0	0	0	0	0	0	0	0	0	0	0	0	0	0	0	0	0	0	0	0	0	0	0	0	0
dpo; DNA polymerase bacteriophage-type [EC:2.7.7.7]	K02334	0	0	1	1	1	1	2	0	1	1	1	0	0	1	1	1	0	0	0	0	1	0	1	0	0	0	1	1	1	1	1	1	1	1	1	1	0	0	0	0	1	0	1	1	1	1	1	1
polA; DNA polymerase I [EC:2.7.7.7]	K02335	5	1	1	1	1	2	1	2	1	3	0	1	2	1	1	1	0	0	0	1	1	1	1	1	1	2	3	1	1	1	1	1	2	1	1	0	1	2	1	1	1	2	1	1	1	1	1	0
polB; DNA polymerase II [EC:2.7.7.7]	K02336	0	0	0	0	0	0	0	0	0	2	1	0	0	0	0	0	0	0	0	0	0	0	0	0	0	1	0	0	0	0	1	0	0	0	0	0	1	0	0	0	0	0	0	1	1	0	0	0
dnaE; DNA polymerase III subunit alpha [EC:2.7.7.7]	K02337	9	2	2	1	1	2	1	0	1	3	1	1	2	2	1	3	0	1	2	1	1	1	0	2	0	2	2	2	2	2	1	2	1	1	0	2	2	1	2	2	0	2	2	3	2	1	3	1
dnaN; DNA polymerase III subunit beta [EC:2.7.7.7]	K02338	3	0	1	0	1	1	1	1	1	1	0	0	1	1	0	0	1	1	1	0	1	2	0	1	1	1	1	2	1	1	1	1	1	1	1	1	1	3	0	1	0	1	0	1	1	1	1	0
holC; DNA polymerase III subunit chi [EC:2.7.7.7]	K02339	0	0	0	0	0	0	0	0	0	0	0	0	0	0	0	0	0	0	0	0	0	0	0	0	0	0	0	0	0	0	0	0	0	0	0	0	0	0	0	0	0	0	0	0	0	0	0	0
holA; DNA polymerase III subunit delta [EC:2.7.7.7]	K02340	3	2	1	1	1	1	1	1	1	1	0	0	1	0	0	1	0	1	0	1	0	1	1	1	0	0	0	0	0	0	1	1	1	1	1	0	1	1	1	1	0	2	1	1	0	0	1	0
holB; DNA polymerase III subunit delta' [EC:2.7.7.7]	K02341	5	1	1	1	1	1	1	1	1	1	0	1	1	1	0	1	0	0	1	0	1	1	1	1	1	0	1	1	1	1	1	1	1	1	1	1	0	0	1	1	0	1	1	1	1	1	1	1
dnaQ; DNA polymerase III subunit epsilon [EC:2.7.7.7]	K02342	15	1	0	2	1	1	1	2	0	2	0	0	1	0	0	2	0	0	0	0	0	1	0	2	1	1	1	0	2	2	0	2	0	2	1	0	1	1	2	3	1	1	0	0	0	0	0	2
dnaX; DNA polymerase III subunit gamma/tau [EC:2.7.7.7]	K02343	5	0	1	1	1	1	1	1	0	0	0	0	0	1	0	1	0	0	1	0	1	1	1	1	0	0	2	1	1	1	1	1	1	1	1	2	2	2	1	2	1	1	0	1	0	1	1	1
dinB; DNA polymerase IV [EC:2.7.7.7]	K02346	4	3	1	0	0	3	1	1	1	1	0	1	0	1	1	2	0	0	0	1	0	1	2	3	0	0	1	1	2	1	1	1	2	1	1	0	2	1	2	3	0	1	2	2	0	1	1	2
polX, dpx; DNA polymerase (family X)	K02347	1	1	1	1	3	2	0	1	1	1	0	0	0	0	0	0	1	0	0	0	0	1	1	1	0	0	0	0	0	0	0	0	0	0	0	2	0	0	0	0	0	0	0	0	0	0	0	0
elaA; ElaA protein	K02348	4	0	0	0	0	0	0	0	0	0	0	0	0	0	0	0	0	0	0	0	0	0	0	0	0	0	0	0	0	0	0	0	0	0	0	0	0	0	0	0	0	0	0	0	0	0	0	0
POLQ; DNA polymerase theta [EC:2.7.7.7]	K02349	0	0	0	0	0	0	0	0	0	0	0	0	0	0	0	0	0	0	0	0	0	0	0	0	0	0	0	0	0	0	0	0	0	0	0	0	0	0	0	0	0	0	0	0	0	0	0	0
REV3L, POLZ; DNA polymerase zeta [EC:2.7.7.7]	K02350	0	0	0	0	0	0	0	0	0	0	0	0	0	0	0	0	0	0	0	0	0	0	0	0	0	0	0	0	0	0	0	0	0	0	0	0	0	0	0	0	0	0	0	0	0	0	0	0
K02351; putative membrane protein	K02351	0	0	0	0	0	0	0	0	0	0	0	0	0	0	0	0	0	0	0	0	0	0	0	0	0	0	0	0	0	0	0	0	0	0	0	0	0	0	0	0	0	0	0	0	0	0	0	0
drp35; lactonase [EC:3.1.1.-]	K02352	0	0	0	0	0	0	0	0	0	0	0	0	0	0	0	0	0	0	0	0	0	0	0	0	0	0	0	0	0	0	0	0	0	0	0	0	0	0	0	0	0	0	0	0	0	0	0	0
fusA, GFM, EFG; elongation factor G	K02355	0	0	2	2	3	3	2	1	4	4	1	1	1	3	2	4	1	1	2	2	3	4	3	3	2	1	7	2	1	2	3	3	3	2	2	3	3	2	0	3	3	3	3	3	2	5	3	1
efp; elongation factor P	K02356	2	0	1	2	1	1	1	0	1	1	0	0	1	0	0	1	0	0	0	1	1	2	0	0	1	0	2	1	1	1	1	1	1	1	0	0	1	1	1	1	1	1	0	1	0	1	1	1
tsf, TSFM; elongation factor Ts	K02357	2	1	1	1	1	1	1	1	1	1	0	0	1	1	1	1	1	0	0	1	1	1	0	1	0	1	2	1	1	1	0	1	1	1	1	0	1	2	1	2	1	1	1	1	0	1	1	1
tuf, TUFM; elongation factor Tu	K02358	0	0	1	1	0	3	1	0	0	2	0	0	1	2	1	1	0	0	1	1	2	1	1	0	0	0	0	1	0	3	0	1	2	1	0	0	1	1	0	0	1	2	1	2	0	2	1	0
entC; isochorismate synthase [EC:5.4.4.2]	K02361	3	0	0	0	0	0	0	0	0	0	0	0	0	0	0	0	0	0	0	0	0	0	0	0	0	0	0	0	0	0	0	0	0	0	0	0	0	0	0	0	0	1	0	0	0	0	0	0
entD; enterobactin synthetase component D [EC:6.3.2.14 2.7.8.-]	K02362	0	0	0	0	0	0	0	0	0	0	0	0	0	0	0	0	0	0	0	0	0	0	0	0	0	0	0	0	0	0	0	0	0	0	0	0	0	0	0	0	0	0	0	0	0	0	0	0
entE, dhbE, vibE, mxcE; 2,3-dihydroxybenzoate-AMP ligase [EC:6.3.2.14 2.7.7.58]	K02363	0	0	0	0	0	0	0	0	0	0	0	0	0	0	1	0	0	0	0	0	0	0	0	0	0	0	0	0	0	0	1	0	0	0	0	0	0	0	0	0	0	0	0	0	0	0	0	0
entF; enterobactin synthetase component F [EC:6.3.2.14]	K02364	0	0	0	0	0	0	0	0	0	0	0	0	0	0	0	0	0	0	0	0	0	0	0	0	0	0	0	0	0	0	0	0	0	0	0	0	0	0	0	0	0	0	0	0	0	0	0	0
ESP1; separase [EC:3.4.22.49]	K02365	0	0	0	0	0	0	0	0	0	0	0	0	0	0	0	0	0	0	0	0	0	0	0	0	0	0	0	0	0	0	0	0	0	0	0	0	0	0	0	0	0	0	0	0	0	0	0	0
fabK; enoyl-[acyl-carrier protein] reductase II [EC:1.3.1.9]	K02371	4	0	0	0	0	0	0	0	0	0	0	0	0	0	1	0	0	0	3	0	0	0	0	0	0	0	0	0	0	0	13	1	4	0	0	0	1	0	0	0	1	2	1	9	3	0	1	2
fabZ; 3-hydroxyacyl-[acyl-carrier-protein] dehydratase [EC:4.2.1.59]	K02372	4	2	3	1	4	3	2	0	4	2	1	0	1	2	1	2	0	1	3	0	1	3	4	2	0	1	4	1	0	0	1	1	1	0	0	2	1	0	0	0	0	0	1	1	0	0	3	0
TSTA3, fcl; GDP-L-fucose synthase [EC:1.1.1.271]	K02377	4	1	0	1	1	1	0	2	0	0	0	0	1	0	0	2	1	0	0	0	0	0	0	0	1	1	0	0	0	0	0	0	0	1	0	1	1	0	0	2	0	0	0	3	1	0	1	0
fdhD; FdhD protein	K02379	0	0	1	1	0	1	0	1	0	1	0	0	0	1	0	1	0	0	0	0	1	0	0	0	0	1	0	1	0	0	2	0	2	2	1	0	0	0	1	0	1	0	2	1	0	0	0	0
fdhE; FdhE protein	K02380	0	0	0	0	0	0	0	0	0	0	0	0	0	1	0	0	0	0	1	0	1	0	1	0	0	0	0	0	0	0	1	0	0	0	0	0	0	0	0	0	0	0	1	0	0	0	0	1
fdrA; FdrA protein	K02381	0	0	0	0	0	0	0	0	0	0	0	0	0	0	0	0	0	0	0	0	0	0	0	0	0	0	0	0	0	0	0	0	1	0	0	0	0	0	0	0	0	0	0	0	0	0	0	0
flbD; flagellar protein FlbD	K02385	0	0	0	0	0	0	0	0	1	0	0	0	0	0	0	0	0	0	0	1	0	1	0	0	0	0	0	0	0	0	0	0	0	0	0	0	0	0	0	0	0	0	0	0	1	0	0	0
flgA; flagella basal body P-ring formation protein FlgA	K02386	0	1	0	0	0	0	1	0	0	0	0	0	0	0	0	0	0	0	0	0	0	0	0	0	0	0	0	0	0	0	0	0	0	0	0	0	0	0	0	0	0	0	0	0	0	0	0	0
flgB; flagellar basal-body rod protein FlgB	K02387	0	0	0	0	0	0	1	0	1	1	0	0	0	1	0	1	1	0	0	1	0	1	0	1	0	0	1	0	0	0	0	0	0	0	0	0	0	0	0	0	0	0	0	0	1	0	1	0
flgC; flagellar basal-body rod protein FlgC	K02388	0	0	0	0	1	0	1	0	1	1	0	0	0	2	0	3	1	1	0	1	0	1	0	1	0	0	2	0	0	0	0	0	0	0	0	0	0	0	0	0	0	0	0	0	1	0	1	0
flgD; flagellar basal-body rod modification protein FlgD	K02389	0	0	0	0	1	0	1	0	0	1	0	0	0	1	0	1	1	1	0	2	0	0	0	1	0	0	0	0	0	0	0	0	0	0	0	0	0	0	0	0	0	0	0	0	1	0	1	0
flgE; flagellar hook protein FlgE	K02390	0	0	0	0	0	0	1	0	1	2	0	0	0	2	0	1	1	0	0	1	0	1	0	1	0	0	0	0	0	0	0	0	0	0	0	0	0	0	0	0	0	0	0	0	1	0	1	0
flgF; flagellar basal-body rod protein FlgF	K02391	0	2	0	0	0	0	0	0	1	0	0	0	0	0	0	0	0	0	0	0	0	1	0	0	0	0	2	0	0	0	0	0	0	0	0	0	0	0	0	0	0	0	0	0	0	0	0	0
flgG; flagellar basal-body rod protein FlgG	K02392	0	2	0	0	0	1	3	0	2	2	0	0	0	0	0	0	0	2	0	2	0	3	0	1	0	0	4	0	0	0	0	0	0	0	0	2	0	0	0	0	0	0	0	2	2	0	2	0
flgH; flagellar L-ring protein precursor FlgH	K02393	0	1	0	0	0	0	1	0	0	1	0	0	0	1	0	1	0	0	0	1	0	1	0	1	0	0	2	0	0	0	0	0	0	0	0	1	0	0	0	0	0	0	0	0	1	0	1	0
flgI; flagellar P-ring protein precursor FlgI	K02394	0	0	0	0	0	0	1	0	1	1	0	0	0	1	0	1	0	0	0	1	0	1	0	1	0	0	2	0	0	0	0	0	0	0	0	1	0	0	0	0	0	0	0	0	1	0	1	0
flgJ; flagellar protein FlgJ	K02395	0	0	0	0	0	0	0	0	0	0	0	0	0	1	0	1	0	0	0	0	0	0	0	0	0	0	0	0	0	0	0	0	0	0	0	0	0	0	0	0	0	0	0	0	1	0	0	0
flgK; flagellar hook-associated protein 1 FlgK	K02396	0	1	0	0	1	0	1	0	1	2	0	1	0	1	0	1	0	1	0	0	0	2	0	1	0	0	2	0	0	0	0	0	0	0	0	1	0	0	0	0	0	0	0	0	0	0	1	0
flgL; flagellar hook-associated protein 3 FlgL	K02397	0	0	0	0	0	0	0	0	2	2	0	1	0	0	0	0	0	0	0	1	0	1	0	1	0	0	0	0	0	0	0	0	0	0	0	0	0	0	0	0	0	0	0	0	0	0	0	0
flgM; negative regulator of flagellin synthesis FlgM	K02398	0	0	0	0	1	0	0	0	1	0	0	0	0	0	0	1	0	0	0	0	0	1	0	0	0	0	1	0	0	0	0	0	0	0	0	0	0	0	0	0	0	0	0	0	0	0	0	0
flgN; flagella synthesis protein FlgN	K02399	0	0	0	0	0	0	0	0	0	0	0	0	0	0	0	0	0	0	0	0	0	0	0	0	0	0	0	0	0	0	0	0	0	0	0	0	0	0	0	0	0	0	0	0	0	0	0	0
flhA; flagellar biosynthesis protein FlhA	K02400	0	0	0	0	1	0	1	0	1	2	0	2	0	1	0	1	0	1	0	1	0	1	3	1	0	0	1	0	0	0	0	0	0	0	0	1	0	0	0	0	0	0	0	0	2	0	1	0
flhB; flagellar biosynthetic protein FlhB	K02401	0	0	0	0	1	0	1	0	1	1	0	1	0	1	0	1	0	1	0	2	0	1	0	1	0	0	0	0	0	0	0	0	0	0	0	1	0	0	0	0	0	0	0	0	1	0	1	0
flhC; flagellar transcriptional activator FlhC	K02402	0	0	0	0	0	0	0	0	0	0	0	0	0	0	0	0	0	0	0	0	0	0	0	0	0	0	0	0	0	0	0	0	0	0	0	0	0	0	0	0	0	0	0	0	0	0	0	0
flhD; flagellar transcriptional activator FlhD	K02403	0	0	0	0	0	0	0	0	0	0	0	0	0	0	0	0	0	0	0	0	0	0	0	0	0	0	0	0	0	0	0	0	0	0	0	0	0	0	0	0	0	0	0	0	0	0	0	0
flhF; flagellar biosynthesis protein FlhF	K02404	0	0	0	0	0	0	1	0	1	0	1	1	0	1	0	2	0	0	0	0	0	1	1	0	0	0	1	0	0	0	0	0	0	0	0	0	1	0	0	0	0	0	0	0	1	0	0	0
fliA; RNA polymerase sigma factor for flagellar operon FliA	K02405	0	0	1	1	1	0	1	0	2	1	0	0	0	3	0	2	1	1	0	1	0	2	1	2	0	0	1	0	0	0	0	0	0	0	0	1	0	0	0	0	0	0	0	0	1	0	2	0
fliC; flagellin	K02406	0	0	0	0	0	0	4	0	1	1	0	1	0	0	0	1	1	2	0	3	0	3	0	2	0	0	1	0	0	0	0	0	0	0	0	1	0	0	0	0	0	0	0	0	0	0	1	0
fliD; flagellar hook-associated protein 2	K02407	0	0	0	0	0	0	1	0	1	1	0	1	0	0	0	2	0	0	0	1	0	1	0	0	0	0	1	0	0	0	0	0	0	0	0	0	0	0	0	0	0	0	0	0	0	0	0	0
fliE; flagellar hook-basal body complex protein FliE	K02408	0	0	0	0	1	0	1	0	0	1	0	0	0	1	0	1	1	1	0	0	0	1	1	1	0	0	1	0	0	0	0	0	0	0	0	0	0	0	0	0	0	0	0	0	1	0	1	0
fliF; flagellar M-ring protein FliF	K02409	0	0	0	0	1	0	1	0	0	1	0	0	0	1	0	1	0	1	0	1	0	2	2	1	0	0	2	0	0	0	0	0	0	0	0	1	0	0	0	0	0	0	0	0	2	0	1	0
fliG; flagellar motor switch protein FliG	K02410	0	0	0	0	1	0	1	0	1	0	0	0	0	1	0	1	0	0	0	1	0	2	1	1	0	0	3	0	0	0	0	0	0	0	0	0	0	0	0	0	0	0	0	0	1	0	0	0
fliH; flagellar assembly protein FliH	K02411	0	0	0	0	0	0	0	0	1	0	0	0	0	1	0	1	0	0	0	1	0	0	1	1	0	0	2	0	0	0	0	0	0	0	0	0	0	0	0	0	0	0	0	0	0	0	0	0
fliI; flagellum-specific ATP synthase [EC:3.6.3.50]	K02412	0	0	0	1	0	0	1	0	1	1	0	0	0	1	0	1	0	0	0	1	0	0	1	1	0	0	2	0	0	0	0	0	0	0	0	0	0	0	0	0	0	0	0	0	1	0	1	0
fliJ; flagellar FliJ protein	K02413	0	0	0	0	0	0	0	0	0	0	0	0	0	1	0	0	0	0	0	0	0	0	0	0	0	0	0	0	0	0	0	0	0	0	0	0	0	0	0	0	0	0	0	0	0	0	0	0
fliK; flagellar hook-length control protein FliK	K02414	0	0	0	0	0	0	0	0	0	0	0	0	0	0	0	1	1	0	0	0	0	0	0	0	0	0	0	0	0	0	0	0	0	0	0	0	0	0	0	0	0	0	0	0	0	0	0	0
fliL; flagellar FliL protein	K02415	0	0	0	0	0	0	1	0	0	1	0	0	0	1	0	1	0	1	0	0	0	1	0	0	0	0	2	0	0	0	0	0	0	0	0	0	0	0	0	0	0	0	0	0	1	0	0	0
fliM; flagellar motor switch protein FliM	K02416	0	0	0	0	1	0	1	0	1	0	0	0	0	1	0	1	1	0	0	1	0	1	1	0	0	0	2	0	0	0	0	0	0	0	0	0	0	0	0	0	0	0	0	0	0	0	0	0
fliNY, fliN; flagellar motor switch protein FliN/FliY	K02417	0	0	0	0	2	0	1	0	2	2	0	0	0	1	0	1	0	1	0	2	0	1	1	0	0	0	2	0	0	0	0	0	0	0	0	1	0	0	0	0	0	0	0	0	1	0	1	0
fliOZ, fliO; flagellar protein FliO/FliZ	K02418	0	0	0	0	0	0	0	0	0	0	0	0	0	0	0	0	0	0	0	0	0	0	0	0	0	0	0	0	0	0	0	0	0	0	0	0	0	0	0	0	0	0	0	0	0	0	0	0
fliP; flagellar biosynthetic protein FliP	K02419	0	0	0	0	1	0	1	0	1	0	0	0	0	2	0	1	0	1	0	1	0	1	0	1	0	0	1	0	0	0	0	0	0	0	0	1	0	0	0	0	0	0	0	0	1	0	1	0
fliQ; flagellar biosynthetic protein FliQ	K02420	0	0	0	0	1	0	1	0	1	1	0	0	0	1	0	1	0	1	0	1	0	1	0	1	0	0	1	0	0	0	0	0	0	0	0	0	0	0	0	0	0	0	0	0	1	0	1	0
fliR; flagellar biosynthetic protein FliR	K02421	0	0	0	0	1	0	1	0	1	1	0	0	0	1	0	1	0	1	0	1	0	1	0	1	0	0	0	0	0	0	0	0	0	0	0	0	0	0	0	0	0	0	0	0	1	0	1	0
fliS; flagellar protein FliS	K02422	0	0	0	0	0	0	1	0	1	1	0	1	0	0	0	1	0	0	0	1	0	0	0	0	0	0	0	0	0	0	0	0	0	0	0	0	0	0	0	0	0	0	0	0	1	0	1	0
fliT; flagellar protein FliT	K02423	0	0	0	0	0	0	0	0	0	0	0	0	0	0	0	0	0	0	0	0	0	0	0	0	0	0	0	0	0	0	0	0	0	0	0	0	0	0	0	0	0	0	0	0	0	0	0	0
sufE; cysteine desulfuration protein SufE	K02426	3	0	0	1	0	1	0	0	1	0	0	0	1	0	0	0	0	0	0	0	0	0	0	0	0	0	0	0	0	0	0	1	0	0	0	0	0	1	0	1	0	1	0	0	0	0	0	0
rlmE, rrmJ, ftsJ; 23S rRNA (uridine2552-2'-O)-methyltransferase [EC:2.1.1.166]	K02427	0	0	0	1	0	0	0	0	0	1	0	0	0	0	1	1	0	0	0	0	1	0	0	0	0	0	0	0	0	0	1	0	1	0	0	0	1	0	0	0	0	0	0	1	0	0	0	0
rdgB; XTP/dITP diphosphohydrolase [EC:3.6.1.66]	K02428	7	1	1	1	1	2	1	1	2	1	0	0	2	1	0	1	0	0	1	2	1	1	1	1	1	1	3	2	0	1	1	3	1	1	1	1	1	1	2	2	1	1	0	2	0	1	1	0
fucP; MFS transporter, FHS family, L-fucose permease	K02429	3	0	0	0	0	0	0	0	0	0	0	0	0	0	0	0	0	0	0	0	0	0	0	0	0	0	0	0	0	0	0	1	0	0	0	0	0	1	0	4	0	1	0	0	0	0	0	0
fucU, FUOM; L-fucose mutarotase [EC:5.1.3.29]	K02431	0	1	1	0	1	0	0	0	1	0	0	0	0	0	0	0	0	0	0	1	0	0	0	0	0	0	0	0	0	0	0	0	0	0	0	0	2	0	0	0	0	0	0	0	0	0	1	0
gatA, QRSL1; aspartyl-tRNA(Asn)/glutamyl-tRNA(Gln) amidotransferase subunit A [EC:6.3.5.6 6.3.5.7]	K02433	1	1	2	2	1	2	1	3	4	2	0	2	1	0	0	2	0	0	1	1	1	2	3	3	1	1	2	0	0	0	2	0	1	1	0	1	1	0	1	0	0	0	3	2	3	1	1	1
gatB, PET112; aspartyl-tRNA(Asn)/glutamyl-tRNA(Gln) amidotransferase subunit B [EC:6.3.5.6 6.3.5.7]	K02434	0	0	1	0	1	1	1	1	1	2	0	1	1	0	0	1	0	0	0	0	0	1	1	2	0	1	1	0	0	0	0	0	0	1	2	1	1	0	1	0	1	0	3	1	0	1	1	0
gatC, GATC; aspartyl-tRNA(Asn)/glutamyl-tRNA(Gln) amidotransferase subunit C [EC:6.3.5.6 6.3.5.7]	K02435	0	0	1	1	1	2	1	1	1	1	0	1	1	0	0	1	0	0	0	0	1	1	1	0	1	1	0	0	0	0	0	0	0	1	0	0	1	0	1	0	0	0	0	1	1	1	0	0
gatR; DeoR family transcriptional regulator, galactitol utilization operon repressor	K02436	0	0	0	0	0	0	0	0	0	0	0	0	0	0	0	0	0	0	0	0	0	0	0	0	0	0	0	0	0	0	0	0	0	0	0	0	1	0	0	0	0	0	0	0	0	0	1	0
gcvH, GCSH; glycine cleavage system H protein	K02437	3	1	2	1	2	1	1	1	2	0	1	1	1	0	3	1	0	1	1	1	0	1	1	2	1	1	2	1	3	1	1	1	5	0	0	0	1	0	1	3	0	2	1	3	0	1	1	0
glgX; glycogen debranching enzyme [EC:3.2.1.196]	K02438	0	0	1	0	1	0	1	0	2	2	0	0	1	0	0	1	0	0	0	0	0	1	0	0	0	0	1	0	1	0	0	0	0	0	1	0	1	0	1	0	0	0	0	0	0	0	0	0
glpE; thiosulfate sulfurtransferase [EC:2.8.1.1]	K02439	0	0	0	0	0	0	1	0	0	0	0	0	0	0	0	0	0	0	0	0	0	0	0	0	0	0	0	0	0	0	0	0	0	0	0	0	0	0	0	0	0	0	0	0	0	0	0	0
GLPF; glycerol uptake facilitator protein	K02440	0	0	1	0	2	0	0	0	0	0	1	0	0	0	1	0	0	0	0	0	0	1	0	1	0	0	1	0	0	0	0	0	0	0	0	0	0	1	0	1	0	0	0	1	0	0	1	0
glpG; GlpG protein	K02441	0	0	0	0	1	0	0	0	0	0	0	0	0	0	0	0	0	0	0	0	0	0	0	0	0	0	0	0	0	0	0	0	0	0	0	0	0	0	0	0	0	0	0	0	0	0	1	0
glpP; glycerol uptake operon antiterminator	K02443	0	0	0	0	0	0	0	0	0	0	0	0	0	0	0	0	0	0	0	0	0	0	0	0	0	0	0	0	0	0	0	0	0	0	0	0	0	0	0	0	0	0	0	0	0	0	0	0
glpR; DeoR family transcriptional regulator, glycerol-3-phosphate regulon repressor	K02444	0	0	0	0	0	1	0	0	0	0	0	1	0	0	0	0	0	0	1	0	0	0	0	0	0	0	0	0	0	0	0	0	1	0	0	0	0	0	0	0	0	0	0	0	0	0	0	0
glpT; MFS transporter, OPA family, glycerol-3-phosphate transporter	K02445	0	2	0	0	0	0	0	0	0	1	0	0	0	0	0	0	0	1	0	2	0	0	1	0	0	0	1	0	0	1	0	0	0	1	0	0	0	0	0	0	0	0	0	0	0	0	0	0
glpX; fructose-1,6-bisphosphatase II [EC:3.1.3.11]	K02446	0	0	0	1	0	0	0	0	0	0	0	0	0	0	0	1	0	0	0	0	0	0	0	0	0	0	0	0	0	0	0	0	0	0	0	0	0	0	1	0	0	0	0	0	0	0	0	0
norD; nitric oxide reductase NorD protein	K02448	0	0	0	0	0	0	0	0	0	0	0	0	0	0	0	1	0	0	0	0	0	0	0	0	0	0	0	0	0	0	0	0	0	0	0	0	0	0	0	0	0	0	0	0	0	0	0	0
gspA; general secretion pathway protein A	K02450	0	2	0	0	1	1	2	0	1	0	0	0	0	3	0	4	1	0	0	2	0	2	2	1	0	1	1	1	1	0	2	0	3	0	2	0	0	0	0	0	0	0	0	2	1	7	0	0
gspB; general secretion pathway protein B	K02451	0	0	0	0	0	0	0	0	0	0	0	0	0	0	0	0	0	0	0	0	0	0	0	0	0	0	0	0	0	0	0	0	1	0	0	0	0	0	0	0	0	0	0	0	0	0	0	0
gspC; general secretion pathway protein C	K02452	0	0	0	1	0	0	0	0	0	0	0	0	0	1	0	0	0	0	1	0	0	0	0	0	0	0	0	0	0	0	1	0	1	0	0	0	0	0	0	0	0	0	0	1	0	0	0	0
gspD; general secretion pathway protein D	K02453	0	2	0	1	1	3	2	0	0	2	0	0	0	1	0	2	3	1	0	1	0	4	1	1	2	0	3	1	0	0	1	0	1	0	0	0	0	0	0	0	0	0	0	1	1	0	3	0
gspE; general secretion pathway protein E	K02454	0	3	2	3	2	3	1	1	3	8	0	1	0	3	0	2	2	0	2	1	0	1	6	6	4	3	3	0	0	1	2	0	0	2	1	3	0	0	0	0	2	0	0	0	2	3	7	0
gspF; general secretion pathway protein F	K02455	0	1	2	1	3	2	1	0	3	1	1	1	0	1	0	1	0	0	0	0	0	0	6	1	0	0	2	0	0	0	1	0	1	0	0	2	0	0	0	0	0	0	0	1	1	2	3	0
gspG; general secretion pathway protein G	K02456	0	1	1	1	3	2	1	0	2	1	1	0	0	2	0	2	3	0	1	0	0	4	2	0	2	3	2	4	0	0	2	0	1	0	0	6	0	0	0	0	0	0	0	2	1	15	6	0
gspH; general secretion pathway protein H	K02457	0	0	0	0	0	0	0	0	0	0	0	0	0	0	0	0	1	0	0	0	0	0	0	0	0	0	0	0	0	0	1	0	1	0	0	0	0	0	0	0	0	0	0	0	0	0	0	0
gspI; general secretion pathway protein I	K02458	0	0	0	1	0	1	0	0	0	0	0	0	0	0	0	0	0	0	0	0	0	0	0	0	0	0	0	0	0	0	1	0	1	0	0	0	0	0	0	0	0	0	0	2	0	0	0	0
gspJ; general secretion pathway protein J	K02459	0	0	0	1	0	0	0	0	0	0	0	0	0	0	0	0	0	0	0	0	0	0	0	0	0	0	0	0	0	0	1	0	1	0	0	0	0	0	0	0	0	0	0	2	0	0	0	0
gspK; general secretion pathway protein K	K02460	0	0	0	0	0	1	1	0	0	1	0	0	0	1	0	0	1	0	0	1	0	0	0	0	1	0	0	0	0	0	2	0	1	0	0	1	0	0	0	0	0	0	0	2	1	1	0	0
gspL; general secretion pathway protein L	K02461	0	0	0	0	0	0	0	0	0	1	0	0	0	1	0	0	0	0	0	0	0	0	0	0	0	0	0	0	0	0	1	0	0	0	0	0	0	0	0	0	0	0	0	0	0	0	0	0
gspM; general secretion pathway protein M	K02462	0	0	0	0	0	0	0	0	0	0	0	0	0	2	0	0	0	0	0	0	0	0	0	0	0	0	0	0	0	0	1	0	1	0	0	0	0	0	0	0	0	0	0	3	0	0	0	0
gspN; general secretion pathway protein N	K02463	0	0	0	0	0	0	0	0	0	0	0	0	0	0	0	0	0	0	0	0	0	0	0	0	0	0	0	0	0	0	0	0	0	0	0	0	0	0	0	0	0	0	0	0	0	0	0	0
gyrA; DNA gyrase subunit A [EC:5.99.1.3]	K02469	3	0	2	2	4	1	2	3	3	2	0	1	1	1	0	1	0	1	1	1	3	2	1	2	1	1	0	2	1	1	1	1	2	1	1	1	1	2	1	2	1	1	0	1	1	2	2	2
gyrB; DNA gyrase subunit B [EC:5.99.1.3]	K02470	4	1	2	2	2	1	2	1	2	5	0	0	1	1	0	0	0	1	0	2	1	1	1	1	1	0	2	2	1	1	1	1	1	1	1	2	1	2	1	1	1	1	0	1	1	1	2	1
bacA; vitamin B12/bleomycin/antimicrobial peptide transport system ATP-binding/permease protein	K02471	0	0	0	0	0	0	0	0	0	0	0	0	1	0	0	0	0	0	0	0	0	0	0	0	0	0	0	0	0	0	0	0	0	0	0	0	0	0	0	0	0	0	0	0	0	0	0	0
wecC; UDP-N-acetyl-D-mannosaminuronic acid dehydrogenase [EC:1.1.1.336]	K02472	1	0	0	0	0	1	0	0	0	0	0	0	0	0	0	0	0	0	0	0	0	0	0	0	0	0	0	0	0	0	1	0	0	0	0	0	0	0	0	0	0	0	1	0	1	0	0	0
wbpP; UDP-N-acetylglucosamine 4-epimerase [EC:5.1.3.7]	K02473	3	0	0	0	0	0	1	1	0	0	0	0	0	0	0	1	0	0	0	0	0	0	0	0	0	0	0	0	0	0	0	1	0	0	0	0	0	1	0	0	0	0	0	0	0	0	0	0
wbpO; UDP-N-acetyl-D-galactosamine dehydrogenase [EC:1.1.1.-]	K02474	7	0	0	1	0	0	0	0	0	0	0	0	0	0	0	1	0	0	0	0	1	0	0	1	1	0	0	0	0	0	0	1	0	0	0	0	0	2	0	0	0	1	0	0	0	0	0	0
K02476; two-component system, CitB family, sensor kinase [EC:2.7.13.3]	K02476	0	0	0	0	0	0	0	0	0	0	0	0	0	0	0	0	0	0	0	0	0	0	0	0	0	0	0	0	0	0	0	0	0	0	0	0	0	0	0	0	0	0	0	0	0	0	0	0
K02477; two-component system, LytTR family, response regulator	K02477	3	1	0	0	0	1	0	1	0	0	0	0	0	0	0	0	0	1	0	0	0	0	0	0	0	0	0	0	1	0	0	3	0	0	0	0	0	1	0	7	0	23	0	0	0	0	0	0
K02478; two-component system, LytTR family, sensor kinase [EC:2.7.13.3]	K02478	0	0	0	0	0	0	0	0	0	0	0	0	0	0	0	0	0	0	0	0	0	0	0	0	0	0	0	0	0	0	0	0	0	0	0	0	0	0	0	0	0	0	0	0	0	0	0	0
K02479; two-component system, NarL family, response regulator	K02479	0	1	0	0	0	1	0	2	0	0	0	0	1	0	0	1	0	0	0	0	0	0	0	0	0	0	0	0	0	0	0	0	0	5	0	0	0	0	0	0	0	0	0	0	0	0	0	0
K02480; two-component system, NarL family, sensor kinase [EC:2.7.13.3]	K02480	0	0	0	0	0	0	0	0	0	0	0	0	0	0	0	0	0	0	0	0	0	0	0	0	0	0	0	0	0	0	0	0	0	0	0	0	0	0	0	0	0	1	0	0	0	0	0	0
K02481; two-component system, NtrC family, response regulator	K02481	0	0	0	0	3	0	0	4	6	6	0	2	0	1	3	5	0	3	2	1	2	3	2	5	3	1	3	3	4	2	4	0	2	1	0	0	0	0	0	0	0	0	0	4	4	1	2	0
K02482; two-component system, NtrC family, sensor kinase [EC:2.7.13.3]	K02482	0	0	0	0	0	0	0	2	0	3	0	2	0	6	4	3	0	0	2	0	1	0	3	4	0	3	0	3	1	1	5	0	1	2	2	3	0	0	0	1	0	1	4	7	5	0	1	0
K02483; two-component system, OmpR family, response regulator	K02483	0	1	2	0	3	0	0	0	2	5	0	0	0	1	1	0	0	1	2	0	0	2	1	2	1	0	1	0	0	0	0	0	1	3	0	0	0	0	1	0	0	0	0	1	0	0	2	0
K02484; two-component system, OmpR family, sensor kinase [EC:2.7.13.3]	K02484	0	0	0	0	0	0	0	0	0	0	0	0	0	0	0	0	0	0	0	0	0	0	0	0	1	0	0	0	0	0	0	0	0	0	2	0	0	0	0	0	0	0	0	0	0	0	1	0
rssB, hnr; two-component system, response regulator	K02485	1	0	0	0	0	0	1	2	0	1	0	0	0	0	1	0	0	1	0	0	1	2	1	0	0	0	0	0	1	0	0	0	0	0	3	0	0	0	0	1	0	1	0	1	0	1	2	0
K02486; two-component system, sensor kinase [EC:2.7.13.3]	K02486	1	0	0	0	2	0	0	0	0	0	0	0	0	0	0	0	0	0	0	0	0	1	0	0	0	1	1	0	1	0	0	0	0	0	1	0	0	0	0	0	0	0	0	0	0	0	1	0
pilL; type IV pili sensor histidine kinase and response regulator	K02487	0	0	0	0	0	0	0	0	0	0	0	0	0	0	0	0	0	0	0	0	0	0	0	0	0	0	0	0	0	0	0	0	0	0	0	0	0	0	0	0	0	0	0	0	0	0	0	0
pleD; two-component system, cell cycle response regulator [EC:2.7.7.65]	K02488	0	1	0	0	0	0	0	0	1	1	0	2	0	1	0	0	0	0	2	4	0	0	0	0	0	0	0	0	4	0	0	0	0	1	0	3	1	0	0	0	0	0	0	1	1	0	3	0
spo0F; two-component system, response regulator, stage 0 sporulation protein F	K02490	0	0	0	0	0	0	0	1	0	0	0	0	0	0	0	1	0	0	0	0	0	0	0	1	0	0	0	2	1	0	3	0	0	1	0	0	0	0	0	0	0	0	0	0	1	0	0	0
kinA; two-component system, sporulation sensor kinase A [EC:2.7.13.3]	K02491	0	0	0	0	0	0	0	0	0	0	0	0	0	0	0	0	0	0	0	0	0	0	0	1	0	0	0	0	0	0	0	0	0	0	0	0	0	0	0	0	0	0	0	0	0	0	0	0
hemA; glutamyl-tRNA reductase [EC:1.2.1.70]	K02492	5	1	1	1	1	1	1	1	1	1	0	1	1	1	0	1	0	1	0	1	1	0	1	1	0	0	0	0	1	0	2	0	1	1	0	1	0	1	0	0	1	0	1	1	1	0	1	0
hemK, prmC, HEMK; release factor glutamine methyltransferase [EC:2.1.1.297]	K02493	4	1	0	1	1	2	1	1	1	2	1	0	1	1	0	1	1	0	0	1	1	1	1	1	1	0	1	1	1	1	1	1	1	1	0	1	1	1	1	2	0	1	0	0	1	2	1	0
lolB; outer membrane lipoprotein LolB	K02494	0	0	0	0	0	0	0	0	0	0	0	0	0	0	0	0	0	0	0	0	0	0	0	0	0	0	0	0	0	0	0	0	0	0	0	0	0	0	0	0	0	0	0	0	0	0	0	0
hemN, hemZ; oxygen-independent coproporphyrinogen III oxidase [EC:1.3.98.3]	K02495	7	2	1	1	2	1	1	2	2	2	0	0	2	2	1	1	1	0	2	0	0	0	0	2	1	1	2	0	3	2	1	1	1	1	1	0	2	1	1	1	1	1	1	2	0	1	1	1
hemX; uroporphyrin-III C-methyltransferase [EC:2.1.1.107]	K02496	0	0	0	0	0	0	0	0	0	0	0	0	0	0	0	0	0	0	0	0	0	0	0	0	0	0	0	0	0	0	0	0	0	0	0	0	0	0	0	0	0	0	0	0	0	0	0	0
hemY; HemY protein	K02498	0	0	0	0	0	0	0	0	0	0	0	0	0	0	0	0	0	0	0	0	0	0	0	0	0	0	0	0	0	0	0	0	0	0	0	0	0	0	0	0	0	0	0	0	0	0	0	0
yabN; tetrapyrrole methylase family protein / MazG family protein	K02499	0	0	0	0	0	1	1	3	1	1	0	0	0	0	0	1	0	0	0	1	0	0	0	1	0	0	0	1	0	1	1	0	1	1	2	0	1	0	0	0	2	0	0	1	0	1	1	1
hisF; imidazole glycerol-phosphate synthase subunit HisF [EC:4.3.2.10]	K02500	4	1	1	2	1	2	1	4	1	1	0	0	1	0	2	0	0	0	0	1	1	1	5	2	2	2	3	0	1	0	2	1	2	2	0	1	0	2	1	3	2	0	4	2	2	2	1	0
hisH; imidazole glycerol-phosphate synthase subunit HisH [EC:4.3.2.10]	K02501	4	1	1	1	1	2	1	3	1	1	0	0	1	0	1	0	0	0	0	1	0	1	1	1	2	1	1	0	1	0	1	0	1	1	0	0	1	1	1	2	1	0	1	1	0	2	0	0
hisZ; ATP phosphoribosyltransferase regulatory subunit	K02502	0	0	0	0	0	0	0	0	0	2	0	0	0	0	0	0	0	0	0	0	0	0	0	0	0	0	0	0	0	0	0	0	0	0	0	0	0	0	0	0	0	0	0	0	0	0	0	0
HINT1, hinT, hit; histidine triad (HIT) family protein	K02503	3	2	1	1	1	2	1	2	1	0	1	0	1	1	0	1	0	0	0	1	1	1	1	1	0	0	0	1	1	0	1	1	1	1	0	0	1	1	1	1	0	2	1	0	0	0	1	0
hofB; protein transport protein HofB	K02504	0	0	0	0	0	0	0	0	0	0	0	0	0	0	0	0	1	0	0	0	0	0	0	0	0	0	0	0	0	0	0	0	0	0	0	0	0	0	0	0	0	0	0	0	0	0	0	0
hofC; protein transport protein HofC	K02505	0	0	0	0	0	0	0	0	1	0	0	0	0	0	0	0	0	0	0	0	0	0	1	0	0	0	0	0	0	0	0	0	0	0	0	0	0	0	0	0	0	0	0	0	0	0	0	0
hofQ; protein transport protein HofQ	K02507	0	0	0	0	0	0	0	0	0	0	0	0	0	0	0	0	0	0	0	0	0	0	0	0	0	0	0	0	0	1	0	0	0	0	0	1	0	0	0	0	0	0	0	0	0	0	0	0
hpaH; 2-oxo-hept-3-ene-1,7-dioate hydratase [EC:4.2.1.-]	K02509	0	0	0	0	0	0	0	0	0	0	0	0	0	0	0	0	0	0	0	0	0	0	0	0	0	0	0	0	0	0	0	0	1	0	0	0	0	0	0	0	0	0	0	0	0	0	0	0
hpaI, hpcH; 4-hydroxy-2-oxoheptanedioate aldolase [EC:4.1.2.52]	K02510	0	1	3	1	5	2	0	1	5	0	2	2	0	0	0	1	6	1	1	2	0	2	3	2	2	3	4	0	0	0	2	0	3	0	2	2	4	0	0	0	0	0	0	2	0	0	0	0
lpxL, htrB; Kdo2-lipid IVA lauroyltransferase [EC:2.3.1.241]	K02517	2	0	0	0	1	0	1	1	2	0	0	1	0	1	1	0	0	2	0	1	0	1	1	2	1	2	2	1	1	1	0	2	2	1	1	0	0	1	1	1	1	2	1	1	1	2	1	0
infA; translation initiation factor IF-1	K02518	0	1	1	1	1	1	1	0	1	0	0	0	1	0	0	1	0	1	1	2	1	1	0	1	1	0	1	1	0	1	0	1	2	1	0	0	1	1	1	2	1	1	1	1	1	1	1	1
infB, MTIF2; translation initiation factor IF-2	K02519	3	1	2	2	1	2	1	1	1	2	1	0	1	1	2	2	0	0	0	1	1	1	1	1	0	0	2	1	1	1	1	2	1	1	1	1	0	2	1	2	1	1	1	2	1	1	1	1
infC, MTIF3; translation initiation factor IF-3	K02520	1	1	1	1	1	1	1	1	1	1	0	0	1	1	1	1	0	0	2	1	1	1	0	1	0	0	1	1	0	0	1	1	1	1	1	0	1	1	1	1	1	1	2	1	2	1	1	1
ilvY; LysR family transcriptional regulator, positive regulator for ilvC	K02521	0	0	0	0	0	0	0	0	0	0	0	0	0	0	0	1	0	0	0	0	0	0	0	0	0	0	0	0	0	0	0	0	0	0	0	0	1	0	0	0	0	0	0	0	0	0	0	0
ispB; octaprenyl-diphosphate synthase [EC:2.5.1.90]	K02523	1	1	1	1	1	1	1	2	0	2	0	0	0	1	1	1	0	1	0	0	1	1	2	2	0	0	1	1	1	0	2	1	1	1	1	0	1	2	0	1	2	1	1	1	1	0	1	0
kdgR; LacI family transcriptional regulator, kdg operon repressor	K02525	0	0	0	0	0	0	0	0	0	0	0	0	0	0	0	0	0	0	0	0	0	0	0	0	0	0	0	0	0	0	0	0	0	0	0	0	0	0	0	0	0	0	0	0	0	0	0	0
kdgT; 2-keto-3-deoxygluconate permease	K02526	1	0	0	0	0	0	0	0	0	0	0	0	0	0	0	0	0	0	0	0	0	0	0	0	0	0	0	0	0	0	0	0	0	0	0	0	0	0	0	0	0	0	0	0	0	0	0	0
kdtA, waaA; 3-deoxy-D-manno-octulosonic-acid transferase [EC:2.4.99.12 2.4.99.13 2.4.99.14 2.4.99.15]	K02527	3	1	1	0	1	1	2	1	2	1	0	0	0	1	2	3	0	0	2	2	3	3	0	3	1	1	2	1	1	0	2	1	4	0	0	2	0	1	0	1	0	1	0	2	2	1	2	0
ksgA; 16S rRNA (adenine1518-N6/adenine1519-N6)-dimethyltransferase [EC:2.1.1.182]	K02528	2	0	1	1	0	1	1	1	2	1	0	0	1	2	1	1	0	1	0	1	0	1	1	1	0	0	2	1	1	1	1	1	1	1	1	0	1	1	1	1	0	0	1	1	1	1	1	0
lacI, galR; LacI family transcriptional regulator	K02529	16	10	0	0	2	5	0	0	2	1	1	1	0	0	0	0	2	0	1	0	0	6	5	1	4	2	3	0	1	2	3	0	0	0	1	1	27	1	1	5	0	1	0	0	0	1	5	0
lacR; DeoR family transcriptional regulator, lactose phosphotransferase system repressor	K02530	0	0	0	0	0	0	0	0	0	0	0	0	0	0	0	0	0	0	0	0	0	0	0	0	0	0	0	0	0	0	0	0	0	0	0	0	1	0	0	0	0	0	0	0	0	0	0	0
lasT; tRNA/rRNA methyltransferase [EC:2.1.1.-]	K02533	0	0	1	1	0	0	0	0	0	0	0	0	1	1	0	3	0	0	1	0	0	0	0	0	0	0	0	1	0	1	0	0	1	0	0	0	1	0	0	1	0	0	0	1	0	0	0	0
lpxC; UDP-3-O-[3-hydroxymyristoyl] N-acetylglucosamine deacetylase [EC:3.5.1.108]	K02535	0	0	0	0	2	0	0	0	1	1	0	2	1	2	0	1	0	1	1	0	0	1	1	0	0	1	0	1	0	1	1	0	0	0	0	0	0	0	0	0	0	0	1	1	0	0	0	0
lpxD; UDP-3-O-[3-hydroxymyristoyl] glucosamine N-acyltransferase [EC:2.3.1.191]	K02536	9	0	1	1	1	2	1	1	1	2	0	0	1	1	1	2	0	0	1	0	2	1	0	1	1	1	1	1	0	1	1	2	1	0	0	1	0	1	0	1	0	3	2	1	2	1	1	0
MCM2; DNA replication licensing factor MCM2 [EC:3.6.4.12]	K02540	0	0	0	0	0	0	0	0	0	0	0	0	0	0	0	0	0	0	0	0	0	0	0	0	0	0	0	0	0	0	0	0	0	0	0	0	0	0	0	0	0	0	0	0	0	0	0	0
MCM3; DNA replication licensing factor MCM3 [EC:3.6.4.12]	K02541	0	0	0	0	0	0	0	0	0	0	0	0	0	0	0	0	0	0	0	0	0	0	0	0	0	0	0	0	0	0	0	0	0	0	0	0	0	0	0	0	0	0	0	0	0	0	0	0
MCM6; DNA replication licensing factor MCM6 [EC:3.6.4.12]	K02542	0	0	0	0	0	0	0	0	0	0	0	0	0	0	0	0	0	0	0	0	0	0	0	0	0	0	0	0	0	0	0	0	0	0	0	0	0	0	0	0	0	0	0	0	0	0	0	0
menA; 1,4-dihydroxy-2-naphthoate polyprenyltransferase [EC:2.5.1.74]	K02548	3	1	0	3	0	1	0	1	0	1	0	0	1	1	1	0	0	0	2	0	0	0	0	0	0	0	0	1	1	1	2	1	0	1	0	1	1	0	1	2	1	1	1	1	0	0	1	1
menC; O-succinylbenzoate synthase [EC:4.2.1.113]	K02549	0	0	0	0	0	1	0	1	1	0	1	0	1	1	0	0	0	0	0	0	0	0	1	1	0	0	1	1	1	0	0	0	0	0	0	0	0	0	2	0	0	0	0	0	0	0	1	0
glcA; glycolate permease	K02550	0	0	0	0	0	0	0	0	0	0	0	0	0	0	0	0	0	0	0	0	0	0	0	0	0	0	0	0	0	0	0	0	0	0	0	0	0	0	0	0	0	0	0	0	0	0	0	0
menD; 2-succinyl-5-enolpyruvyl-6-hydroxy-3-cyclohexene-1-carboxylate synthase [EC:2.2.1.9]	K02551	4	1	0	0	0	1	0	1	0	2	0	0	1	0	0	0	0	0	0	0	0	0	0	0	0	0	0	0	1	0	0	0	0	0	0	0	0	0	1	2	0	1	0	0	0	0	1	0
menF; menaquinone-specific isochorismate synthase [EC:5.4.4.2]	K02552	0	2	0	0	0	1	0	1	0	1	0	0	1	0	0	0	0	0	0	0	0	0	0	0	0	0	0	0	1	0	0	0	0	0	0	0	0	0	1	0	0	0	0	0	0	0	1	0
rraA, menG; regulator of ribonuclease activity A	K02553	0	0	0	0	0	0	0	0	0	0	0	0	0	0	0	0	0	0	0	0	0	0	0	0	0	0	0	0	0	0	0	0	0	0	0	0	0	0	0	0	0	0	0	0	0	0	0	0
mhpD; 2-keto-4-pentenoate hydratase [EC:4.2.1.80]	K02554	0	0	0	1	0	0	0	0	0	0	0	0	0	0	0	0	0	0	0	0	0	0	1	0	0	0	0	0	0	0	0	0	2	0	0	0	0	0	0	0	0	0	0	0	0	0	0	0
motA; chemotaxis protein MotA	K02556	0	0	0	0	1	0	3	0	1	1	0	1	0	2	0	2	0	1	0	2	0	1	0	0	0	0	0	0	2	2	0	0	0	0	0	1	0	0	0	0	0	0	0	0	1	0	1	0
motB; chemotaxis protein MotB	K02557	6	1	0	0	1	0	1	0	3	5	0	1	0	4	0	2	1	4	0	1	0	2	1	1	1	0	3	0	3	2	2	0	0	0	0	2	0	1	0	1	0	0	0	0	1	1	2	0
mpl; UDP-N-acetylmuramate: L-alanyl-gamma-D-glutamyl-meso-diaminopimelate ligase [EC:6.3.2.45]	K02558	4	1	0	1	0	1	1	0	0	1	0	0	0	0	0	1	0	0	2	1	1	0	0	0	0	0	0	0	0	0	1	1	1	0	0	0	0	0	0	1	0	1	0	1	0	0	0	0
murG; UDP-N-acetylglucosamine--N-acetylmuramyl-(pentapeptide) pyrophosphoryl-undecaprenol N-acetylglucosamine transferase [EC:2.4.1.227]	K02563	4	1	0	1	0	1	1	2	1	1	0	0	1	1	1	1	0	1	0	0	1	1	1	1	0	1	0	0	1	1	1	1	2	0	0	1	1	1	1	1	0	1	1	2	1	1	1	0
nagB, GNPDA; glucosamine-6-phosphate deaminase [EC:3.5.99.6]	K02564	1	2	2	0	4	2	0	0	0	0	0	0	1	0	1	0	2	0	1	2	0	3	6	5	2	3	5	0	2	2	1	1	0	0	0	2	9	0	0	3	0	1	1	0	0	0	4	0
nagC; N-acetylglucosamine repressor	K02565	0	0	0	0	0	0	0	0	1	0	0	0	0	0	0	0	0	0	0	0	0	0	0	0	0	0	0	0	0	0	0	0	0	0	0	0	0	0	0	0	0	0	0	0	0	0	0	0
nagD; NagD protein	K02566	0	0	0	0	0	1	0	0	1	0	0	0	0	0	1	0	0	0	0	0	0	0	2	0	0	1	0	0	0	0	0	0	0	0	2	0	1	0	0	0	0	0	0	0	0	0	0	0
NRT, narK, nrtP, nasA; MFS transporter, NNP family, nitrate/nitrite transporter	K02575	1	1	1	0	0	0	1	2	1	1	0	0	1	0	1	0	0	0	0	0	1	0	0	0	0	0	0	0	0	0	0	0	1	0	0	0	0	0	3	0	0	0	1	0	0	0	0	0
NDST2; heparan sulfate N-deacetylase/N-sulfotransferase NDST2 [EC:3.1.1.- 2.8.2.-]	K02577	0	0	0	0	0	0	0	0	0	0	0	0	0	0	0	0	0	0	0	0	0	0	0	0	0	0	0	0	0	0	0	0	0	0	0	0	0	0	0	0	0	0	0	0	0	0	0	0
nifV; homocitrate synthase NifV [EC:2.3.3.14]	K02594	0	0	0	0	0	0	0	0	0	0	1	0	0	0	0	0	0	0	0	0	0	0	0	0	0	0	0	0	0	0	0	0	0	1	0	0	0	0	0	0	1	0	0	0	0	0	1	1
nirC; nitrite transporter	K02598	0	0	0	0	0	0	1	0	0	0	0	0	0	0	0	0	0	0	0	0	0	0	0	0	0	0	0	0	0	0	0	0	0	0	0	0	0	0	0	0	0	0	0	0	0	0	0	0
NOTCH1; Notch 1	K02599	0	0	0	0	0	0	0	0	0	0	0	0	0	0	0	0	0	0	0	0	0	0	0	0	0	0	0	0	0	0	0	0	0	0	0	0	0	0	0	0	0	0	0	0	0	0	0	0
nusA; N utilization substance protein A	K02600	2	1	1	1	0	2	1	0	1	0	0	0	1	1	1	1	0	0	0	1	1	1	0	1	1	0	1	1	1	1	1	1	1	1	1	1	0	2	1	1	1	1	0	1	1	2	1	0
nusG; transcriptional antiterminator NusG	K02601	0	0	1	0	1	1	1	0	1	0	0	0	1	1	0	2	0	0	1	0	1	1	1	1	0	0	1	2	0	1	1	1	2	1	1	0	1	1	1	1	1	1	1	0	0	1	1	0
paaA; ring-1,2-phenylacetyl-CoA epoxidase subunit PaaA [EC:1.14.13.149]	K02609	0	0	0	0	0	0	0	0	0	0	0	0	0	0	0	0	0	0	0	0	0	0	0	0	0	0	0	0	0	0	0	0	0	0	0	0	0	0	0	0	0	0	0	0	0	0	0	0
paaB; ring-1,2-phenylacetyl-CoA epoxidase subunit PaaB	K02610	0	0	0	0	0	0	0	0	0	0	0	0	0	0	0	0	0	0	0	0	0	0	0	0	0	0	0	0	0	0	0	0	0	0	0	0	0	0	0	0	0	0	0	0	0	0	0	0
paaC; ring-1,2-phenylacetyl-CoA epoxidase subunit PaaC [EC:1.14.13.149]	K02611	0	0	0	0	0	0	0	0	0	0	0	0	0	0	0	0	0	0	0	0	0	0	0	0	0	0	0	0	0	0	0	0	0	0	0	0	0	0	0	0	0	0	0	0	0	0	0	0
paaD; ring-1,2-phenylacetyl-CoA epoxidase subunit PaaD	K02612	0	0	0	0	0	0	0	0	0	0	0	0	0	0	0	0	0	0	0	0	0	0	0	0	0	0	0	0	0	0	0	0	0	0	0	0	0	0	0	0	0	0	0	0	0	0	0	0
paaE; ring-1,2-phenylacetyl-CoA epoxidase subunit PaaE	K02613	8	0	0	0	0	0	0	0	0	0	0	0	0	0	0	0	0	0	0	0	0	0	0	0	0	0	0	0	0	0	0	0	0	0	0	0	0	0	0	0	0	0	0	0	0	0	0	0
paaI; acyl-CoA thioesterase [EC:3.1.2.-]	K02614	0	0	0	0	0	0	0	0	1	0	0	1	0	0	1	1	0	0	1	0	0	0	0	0	0	1	0	0	0	0	1	0	0	3	0	0	0	0	0	0	2	0	0	2	0	0	0	0
paaJ; 3-oxo-5,6-didehydrosuberyl-CoA/3-oxoadipyl-CoA thiolase [EC:2.3.1.223 2.3.1.174]	K02615	0	0	0	0	0	0	0	0	0	0	0	0	0	0	0	0	0	0	0	0	0	0	0	0	0	0	0	0	0	0	1	0	0	0	0	0	0	0	0	0	0	0	0	2	0	0	0	0
paaX; phenylacetic acid degradation operon negative regulatory protein	K02616	0	0	0	0	0	0	0	1	0	0	0	0	1	0	0	0	0	0	0	0	0	0	0	0	1	0	0	0	0	0	0	0	0	0	0	0	0	0	1	0	0	0	0	0	0	0	0	0
paaY; phenylacetic acid degradation protein	K02617	1	0	0	0	0	0	0	0	0	0	0	0	0	0	0	0	0	0	0	0	0	0	0	0	0	0	0	0	0	0	0	0	0	0	0	0	0	0	0	0	0	0	0	0	0	0	0	0
paaZ; oxepin-CoA hydrolase / 3-oxo-5,6-dehydrosuberyl-CoA semialdehyde dehydrogenase [EC:3.3.2.12 1.2.1.91]	K02618	1	0	0	0	0	0	0	0	0	0	0	0	0	0	0	0	0	0	0	0	0	0	0	0	0	0	0	0	0	0	0	0	0	0	0	0	0	0	0	0	0	0	0	0	0	0	0	0
pabC; 4-amino-4-deoxychorismate lyase [EC:4.1.3.38]	K02619	0	0	0	1	0	0	0	0	0	0	0	0	0	0	0	0	0	0	0	0	0	0	0	0	0	0	0	0	0	0	0	0	0	0	0	0	0	1	0	1	0	1	0	0	0	0	0	0
parC; topoisomerase IV subunit A [EC:5.99.1.-]	K02621	6	1	0	0	0	1	0	0	0	0	0	0	0	1	0	1	0	0	0	0	0	0	0	0	0	0	0	0	0	0	1	1	1	0	0	1	1	1	0	2	0	2	0	1	0	0	1	0
parE; topoisomerase IV subunit B [EC:5.99.1.-]	K02622	3	1	0	1	1	1	1	0	1	2	0	0	0	1	0	1	0	1	0	0	0	0	0	0	0	0	0	0	0	0	1	1	1	0	0	1	1	1	0	1	0	1	0	1	0	0	1	0
pcaQ; LysR family transcriptional regulator, pca operon transcriptional activator	K02623	0	0	0	0	0	0	0	0	0	0	0	0	0	0	0	0	0	0	0	0	0	0	0	0	0	0	0	0	0	0	0	0	0	0	0	0	0	0	0	0	0	0	0	0	0	0	0	0
pcaR; IclR family transcriptional regulator, pca regulon regulatory protein	K02624	0	0	0	0	0	0	0	0	0	0	0	1	0	0	0	0	0	0	1	0	0	0	0	0	0	0	0	0	0	0	0	0	1	0	0	0	0	0	0	0	0	0	1	0	0	0	0	0
pdaD; arginine decarboxylase [EC:4.1.1.19]	K02626	0	0	0	0	0	0	0	0	0	1	0	0	0	1	0	0	0	0	0	0	0	0	0	0	0	0	0	1	0	0	1	0	0	0	0	1	0	0	0	0	0	0	1	1	0	0	0	0
petA; apocytochrome f	K02634	0	0	0	0	0	0	0	0	0	0	0	0	1	0	0	0	0	0	0	0	0	0	0	0	0	0	0	0	0	0	0	0	0	0	0	0	0	0	0	0	0	0	0	0	0	0	0	0
petB; cytochrome b6	K02635	0	0	0	0	0	0	0	1	1	0	0	0	1	0	0	0	0	1	0	0	0	3	2	1	0	0	1	1	1	0	0	0	0	0	0	0	0	0	0	0	0	0	0	0	0	0	1	0
petC; cytochrome b6-f complex iron-sulfur subunit [EC:7.1.1.6]	K02636	0	0	0	0	0	0	1	1	2	1	1	0	1	1	0	1	0	2	1	0	0	2	3	1	0	0	2	1	1	0	0	1	1	0	0	0	0	0	0	0	0	0	0	0	1	0	2	0
petD; cytochrome b6-f complex subunit 4	K02637	0	0	0	0	0	0	0	0	0	0	0	0	2	0	0	0	0	0	0	0	0	0	0	0	0	0	0	0	0	0	0	0	0	0	0	0	0	0	0	0	0	0	0	0	0	0	0	0
petE; plastocyanin	K02638	0	0	0	0	0	0	0	1	0	0	0	0	1	0	0	0	0	0	0	0	0	0	0	0	0	0	0	0	0	0	0	0	0	0	0	0	0	0	0	0	0	0	0	0	0	0	0	0
petF; ferredoxin	K02639	0	0	0	0	0	0	0	0	0	0	0	0	2	0	0	0	0	0	0	0	0	0	0	0	0	0	0	0	0	0	0	0	0	0	0	0	0	0	0	0	0	0	0	0	0	0	0	0
petG; cytochrome b6-f complex subunit 5	K02640	0	0	0	0	0	0	0	0	0	0	0	0	0	0	0	0	0	0	0	0	0	0	0	0	0	0	0	0	0	0	0	0	0	0	0	0	0	0	0	0	0	0	0	0	0	0	0	0
petH; ferredoxin--NADP+ reductase [EC:1.18.1.2]	K02641	0	0	0	0	0	0	0	0	0	0	0	0	1	0	0	0	0	0	0	0	0	0	0	0	0	0	0	0	0	0	0	0	0	0	0	0	0	0	0	0	0	0	0	0	0	0	0	0
petM; cytochrome b6-f complex subunit 7	K02643	0	0	0	0	0	0	0	0	0	0	0	0	1	0	0	0	0	0	0	0	0	0	0	0	0	0	0	0	0	0	0	0	0	0	0	0	0	0	0	0	0	0	0	0	0	0	0	0
cdaR; carbohydrate diacid regulator	K02647	0	0	0	0	0	0	0	0	0	0	0	0	0	0	0	0	0	0	0	0	0	0	0	0	0	0	0	0	0	0	0	0	0	0	0	0	0	0	0	0	0	0	0	0	0	0	0	0
pilA; type IV pilus assembly protein PilA	K02650	0	0	0	6	0	1	1	0	0	1	0	0	1	2	0	0	0	0	0	0	1	1	1	1	1	0	0	0	0	0	0	0	0	1	0	1	0	0	0	0	0	0	0	1	0	0	0	0
flp, pilA; pilus assembly protein Flp/PilA	K02651	0	0	0	0	2	0	0	0	2	0	0	0	0	0	0	0	0	0	0	0	0	1	1	0	0	0	1	0	0	0	0	0	0	0	2	0	0	0	0	0	0	0	0	0	0	0	0	0
pilB; type IV pilus assembly protein PilB	K02652	0	5	4	2	3	6	0	4	7	5	0	4	1	3	0	3	3	4	1	6	1	5	10	9	6	7	7	2	2	2	1	0	1	0	1	6	0	0	0	0	0	0	1	4	6	14	6	0
pilC; type IV pilus assembly protein PilC	K02653	0	2	2	2	5	4	1	0	4	3	3	0	1	2	1	1	2	1	1	6	1	4	4	2	3	6	5	2	3	3	1	0	1	2	1	7	0	0	0	0	2	0	2	3	3	8	7	0
pilD, pppA; leader peptidase (prepilin peptidase) / N-methyltransferase [EC:3.4.23.43 2.1.1.-]	K02654	0	1	1	1	1	1	1	1	2	2	0	0	1	2	1	1	0	0	0	0	1	1	1	0	1	0	1	1	1	1	1	0	1	1	1	1	0	0	1	0	1	0	1	0	1	1	1	1
pilE; type IV pilus assembly protein PilE	K02655	0	0	0	1	0	0	1	1	0	0	0	0	0	0	0	0	0	0	0	0	0	0	0	0	0	0	0	0	1	1	0	0	0	0	0	1	0	0	0	0	0	0	0	0	0	2	0	0
pilF; type IV pilus assembly protein PilF	K02656	0	0	0	0	0	0	0	0	0	0	0	0	0	0	0	0	0	0	0	0	0	0	0	0	0	0	0	0	0	0	0	0	0	0	0	0	0	0	0	0	0	0	0	0	0	0	0	0
pilG; twitching motility two-component system response regulator PilG	K02657	0	0	0	0	0	0	0	0	0	0	0	0	0	1	0	0	0	0	2	0	0	0	0	1	0	0	0	0	0	0	0	0	0	0	0	0	0	0	0	0	0	0	0	1	0	0	0	0
pilH; twitching motility two-component system response regulator PilH	K02658	0	0	0	0	0	0	0	0	0	0	0	0	0	0	1	0	0	0	2	0	0	0	0	0	0	1	0	0	0	0	1	0	0	0	0	0	0	0	0	0	0	0	0	0	0	1	2	0
pilI; twitching motility protein PilI	K02659	0	0	0	0	0	0	0	0	0	0	0	0	0	0	0	0	0	0	0	0	0	0	0	0	0	0	0	0	0	0	0	0	0	0	0	0	0	0	0	0	0	0	0	0	0	0	0	0
pilJ; twitching motility protein PilJ	K02660	0	0	0	0	0	0	0	0	0	0	0	0	0	0	0	0	0	0	0	0	0	0	0	1	0	0	1	0	0	0	0	0	0	0	0	0	0	0	0	0	0	0	0	0	0	0	0	0
pilM; type IV pilus assembly protein PilM	K02662	0	1	0	1	1	1	1	2	1	1	0	0	1	1	1	1	0	0	1	0	1	3	1	0	0	1	4	1	0	1	1	0	1	0	0	0	0	0	0	0	0	0	1	1	0	0	1	0
pilN; type IV pilus assembly protein PilN	K02663	0	0	0	0	0	0	0	0	0	1	0	0	1	1	1	1	0	0	1	0	1	0	0	0	0	0	0	1	0	0	1	0	1	0	0	0	0	0	0	0	0	0	1	1	0	0	0	0
pilO; type IV pilus assembly protein PilO	K02664	0	0	0	0	0	0	0	0	0	1	0	0	1	1	1	1	0	0	0	0	1	0	0	0	0	0	0	0	0	0	1	0	1	0	0	0	0	0	0	0	0	0	1	1	0	0	0	0
pilP; type IV pilus assembly protein PilP	K02665	0	0	0	0	0	0	0	0	0	1	0	0	0	1	0	0	0	1	0	0	1	0	0	0	0	0	0	0	0	0	0	0	0	0	0	0	0	0	0	0	0	0	0	1	0	0	0	0
pilQ; type IV pilus assembly protein PilQ	K02666	0	1	0	1	0	1	1	2	0	1	0	1	1	2	0	1	0	1	2	0	1	1	1	0	2	0	1	1	0	2	1	0	0	0	0	2	0	0	0	0	0	0	0	3	0	2	1	0
pilR, pehR; two-component system, NtrC family, response regulator PilR	K02667	0	0	0	1	0	1	1	1	0	5	2	0	0	1	2	4	0	1	0	1	1	0	1	1	0	1	1	2	2	1	1	0	2	0	0	1	1	0	0	2	0	1	1	1	0	0	2	0
pilS, pehS; two-component system, NtrC family, sensor histidine kinase PilS [EC:2.7.13.3]	K02668	0	0	0	1	0	0	1	2	0	1	0	0	0	2	1	1	0	0	0	1	1	0	0	0	0	0	0	1	0	0	1	0	1	0	0	0	0	0	0	0	0	0	1	1	0	0	0	0
pilT; twitching motility protein PilT	K02669	0	5	2	7	4	5	2	2	3	7	1	1	1	2	1	3	2	4	0	4	2	3	1	9	1	5	3	2	1	2	2	0	4	3	1	3	0	0	0	0	0	0	2	3	6	4	5	0
pilU; twitching motility protein PilU	K02670	0	0	0	0	0	0	0	0	0	0	0	0	0	0	0	0	0	0	0	0	0	0	0	0	0	0	0	0	1	0	0	0	0	0	0	0	0	0	0	0	0	0	0	0	0	0	0	0
pilV; type IV pilus assembly protein PilV	K02671	0	0	0	0	0	0	1	0	0	0	0	0	0	1	0	1	0	0	0	0	1	0	0	0	0	0	0	0	0	0	0	0	0	0	0	0	0	0	0	0	0	0	1	1	0	0	0	0
pilW; type IV pilus assembly protein PilW	K02672	0	0	0	0	0	0	0	0	0	0	0	1	0	1	0	2	0	0	1	0	1	0	0	0	0	0	0	0	0	0	0	0	0	0	0	0	0	0	0	0	0	0	0	1	0	0	0	0
pilX; type IV pilus assembly protein PilX	K02673	0	0	0	0	0	0	0	0	0	0	0	0	0	0	0	0	0	0	0	0	0	0	0	0	0	0	0	0	0	0	0	0	0	0	0	0	0	0	0	0	0	0	0	0	0	0	0	0
pilY1; type IV pilus assembly protein PilY1	K02674	0	0	0	0	0	0	0	0	0	1	0	0	0	0	0	1	0	1	0	0	0	0	0	0	0	0	0	0	0	0	0	0	0	0	0	0	0	0	0	0	0	0	0	0	0	0	0	0
pilZ; type IV pilus assembly protein PilZ	K02676	0	0	0	0	0	0	0	0	0	2	0	0	0	0	0	0	0	0	0	0	0	0	0	0	0	0	0	0	0	0	0	0	0	0	0	0	0	0	0	0	0	0	0	0	0	0	0	0
ppdD; prepilin peptidase dependent protein D	K02682	0	0	0	0	0	0	0	0	0	0	0	0	0	0	0	0	0	0	0	0	0	0	0	0	0	0	0	0	0	0	0	0	0	0	0	0	0	0	0	0	0	0	0	0	0	0	0	0
priS, pri1, priA; DNA primase small subunit [EC:2.7.7.102]	K02683	0	0	0	0	0	0	0	0	0	0	0	0	0	0	0	0	0	0	0	0	0	0	0	0	0	0	0	0	0	0	0	0	0	0	0	0	0	0	0	0	0	0	0	0	0	0	0	0
priB; primosomal replication protein N	K02686	0	0	0	0	0	0	0	0	0	0	0	0	0	0	0	0	0	0	0	0	0	0	0	0	0	0	0	0	0	0	0	0	0	0	0	0	0	0	0	0	0	0	0	0	0	0	0	0
prmA; ribosomal protein L11 methyltransferase [EC:2.1.1.-]	K02687	2	1	0	1	0	1	0	1	0	1	0	0	1	2	1	1	0	0	0	0	1	0	0	0	1	0	0	0	1	1	1	1	1	0	0	0	0	0	0	1	0	0	0	1	0	0	0	0
prpR; transcriptional regulator, propionate catabolism operon regulatory protein	K02688	0	0	0	0	0	0	0	0	0	0	0	0	0	0	0	0	0	0	1	0	0	0	0	0	0	0	0	0	0	0	0	0	0	0	0	0	0	0	0	0	0	0	1	0	0	0	0	0
psaA; photosystem I P700 chlorophyll a apoprotein A1	K02689	0	0	0	0	0	0	0	0	0	0	0	0	0	0	0	0	0	0	0	0	0	0	0	0	0	0	0	0	0	0	0	0	0	0	0	0	0	0	0	0	0	0	0	0	0	0	0	0
psaB; photosystem I P700 chlorophyll a apoprotein A2	K02690	0	0	0	0	0	0	0	0	0	0	0	0	0	0	0	0	0	0	0	0	0	0	0	0	0	0	0	0	0	0	0	0	0	0	0	0	0	0	0	0	0	0	0	0	0	0	0	0
psaC; photosystem I subunit VII	K02691	0	0	0	0	0	0	0	0	0	0	0	0	1	0	0	0	0	0	0	0	0	0	0	0	0	0	0	0	0	0	0	0	0	0	0	0	0	0	0	0	0	0	0	0	0	0	0	0
psaD; photosystem I subunit II	K02692	0	0	0	0	0	0	0	0	0	0	0	0	1	0	0	0	0	0	0	0	0	0	0	0	0	0	0	0	0	0	0	0	0	0	0	0	0	0	0	0	0	0	0	0	0	0	0	0
psaE; photosystem I subunit IV	K02693	0	0	0	0	0	0	0	0	0	0	0	0	0	0	0	0	0	0	0	0	0	0	0	0	0	0	0	0	0	0	0	0	0	0	0	0	0	0	0	0	0	0	0	0	0	0	0	0
psaF; photosystem I subunit III	K02694	0	0	0	0	0	0	0	0	0	0	0	0	1	0	0	0	0	0	0	0	0	0	0	0	0	0	0	0	0	0	0	0	0	0	0	0	0	0	0	0	0	0	0	0	0	0	0	0
psaI; photosystem I subunit VIII	K02696	0	0	0	0	0	0	0	0	0	0	0	0	0	0	0	0	0	0	0	0	0	0	0	0	0	0	0	0	0	0	0	0	0	0	0	0	0	0	0	0	0	0	0	0	0	0	0	0
psaJ; photosystem I subunit IX	K02697	0	0	0	0	0	0	0	0	0	0	0	0	1	0	0	0	0	0	0	0	0	0	0	0	0	0	0	0	0	0	0	0	0	0	0	0	0	0	0	0	0	0	0	0	0	0	0	0
psaK; photosystem I subunit X	K02698	0	0	0	0	0	0	0	0	0	0	0	0	0	0	0	0	0	0	0	0	0	0	0	0	0	0	0	0	0	0	0	0	0	0	0	0	0	0	0	0	0	0	0	0	0	0	0	0
psaL; photosystem I subunit XI	K02699	0	0	0	0	0	0	0	0	0	0	0	0	0	0	0	0	0	0	0	0	0	0	0	0	0	0	0	0	0	0	0	0	0	0	0	0	0	0	0	0	0	0	0	0	0	0	0	0
psaM; photosystem I subunit XII	K02700	0	0	0	0	0	0	0	0	0	0	0	0	1	0	0	0	0	0	0	0	0	0	0	0	0	0	0	0	0	0	0	0	0	0	0	0	0	0	0	0	0	0	0	0	0	0	0	0
psbA; photosystem II P680 reaction center D1 protein [EC:1.10.3.9]	K02703	0	0	0	0	0	0	0	0	0	0	0	0	6	0	0	0	0	0	0	0	0	0	0	0	0	0	0	0	0	0	0	0	0	0	0	0	0	0	0	0	0	0	0	0	0	0	0	0
psbB; photosystem II CP47 chlorophyll apoprotein	K02704	0	0	0	0	0	0	0	0	0	0	0	0	1	0	0	0	0	0	0	0	0	0	0	0	0	0	0	0	0	0	0	0	0	0	0	0	0	0	0	0	0	0	0	0	0	0	0	0
psbC; photosystem II CP43 chlorophyll apoprotein	K02705	0	0	0	0	0	0	0	0	0	0	0	0	1	0	0	0	0	0	0	0	0	0	0	0	0	0	0	0	0	0	0	0	0	0	0	0	0	0	0	0	0	0	0	0	0	0	0	0
psbD; photosystem II P680 reaction center D2 protein [EC:1.10.3.9]	K02706	0	0	0	0	0	0	0	0	0	0	0	0	2	0	0	0	0	0	0	0	0	0	0	0	0	0	0	0	0	0	0	0	0	0	0	0	0	0	0	0	0	0	0	0	0	0	0	0
psbE; photosystem II cytochrome b559 subunit alpha	K02707	0	0	0	0	0	0	0	0	0	0	0	0	1	0	0	0	0	0	0	0	0	0	0	0	0	0	0	0	0	0	0	0	0	0	0	0	0	0	0	0	0	0	0	0	0	0	0	0
psbF; photosystem II cytochrome b559 subunit beta	K02708	0	0	0	0	0	0	0	0	0	0	0	0	1	0	0	0	0	0	0	0	0	0	0	0	0	0	0	0	0	0	0	0	0	0	0	0	0	0	0	0	0	0	0	0	0	0	0	0
psbH; photosystem II PsbH protein	K02709	0	0	0	0	0	0	0	0	0	0	0	0	1	0	0	0	0	0	0	0	0	0	0	0	0	0	0	0	0	0	0	0	0	0	0	0	0	0	0	0	0	0	0	0	0	0	0	0
psbI; photosystem II PsbI protein	K02710	0	0	0	0	0	0	0	0	0	0	0	0	1	0	0	0	0	0	0	0	0	0	0	0	0	0	0	0	0	0	0	0	0	0	0	0	0	0	0	0	0	0	0	0	0	0	0	0
psbJ; photosystem II PsbJ protein	K02711	0	0	0	0	0	0	0	0	0	0	0	0	1	0	0	0	0	0	0	0	0	0	0	0	0	0	0	0	0	0	0	0	0	0	0	0	0	0	0	0	0	0	0	0	0	0	0	0
psbK; photosystem II PsbK protein	K02712	0	0	0	0	0	0	0	0	0	0	0	0	1	0	0	0	0	0	0	0	0	0	0	0	0	0	0	0	0	0	0	0	0	0	0	0	0	0	0	0	0	0	0	0	0	0	0	0
psbL; photosystem II PsbL protein	K02713	0	0	0	0	0	0	0	0	0	0	0	0	1	0	0	0	0	0	0	0	0	0	0	0	0	0	0	0	0	0	0	0	0	0	0	0	0	0	0	0	0	0	0	0	0	0	0	0
psbM; photosystem II PsbM protein	K02714	0	0	0	0	0	0	0	0	0	0	0	0	1	0	0	0	0	0	0	0	0	0	0	0	0	0	0	0	0	0	0	0	0	0	0	0	0	0	0	0	0	0	0	0	0	0	0	0
psbN; PsbN protein	K02715	0	0	0	0	0	0	0	0	0	0	0	0	1	0	0	0	0	0	0	0	0	0	0	0	0	0	0	0	0	0	0	0	0	0	0	0	0	0	0	0	0	0	0	0	0	0	0	0
psbO; photosystem II oxygen-evolving enhancer protein 1	K02716	0	0	0	0	0	0	0	0	0	0	0	0	1	0	0	0	0	0	0	0	0	0	0	0	0	0	0	0	0	0	0	0	0	0	0	0	0	0	0	0	0	0	0	0	0	0	0	0
psbP; photosystem II oxygen-evolving enhancer protein 2	K02717	0	0	0	0	0	0	0	0	0	0	0	0	1	0	0	0	0	0	0	0	0	0	0	0	0	0	0	0	0	0	0	0	0	0	0	0	0	0	0	0	0	0	0	0	0	0	0	0
psbT; photosystem II PsbT protein	K02718	0	0	0	0	0	0	0	0	0	0	0	0	1	0	0	0	0	0	0	0	0	0	0	0	0	0	0	0	0	0	0	0	0	0	0	0	0	0	0	0	0	0	0	0	0	0	0	0
psbU; photosystem II PsbU protein	K02719	0	0	0	0	0	0	0	0	0	0	0	0	1	0	0	0	0	0	0	0	0	0	0	0	0	0	0	0	0	0	0	0	0	0	0	0	0	0	0	0	0	0	0	0	0	0	0	0
psbV; photosystem II cytochrome c550	K02720	0	0	0	0	0	0	0	0	0	0	0	0	1	0	0	0	0	0	0	0	0	0	0	0	0	0	0	0	0	0	0	0	0	0	0	0	0	0	0	0	0	0	0	0	0	0	0	0
psbX; photosystem II PsbX protein	K02722	0	0	0	0	0	0	0	0	0	0	0	0	0	0	0	0	0	0	0	0	0	0	0	0	0	0	0	0	0	0	0	0	0	0	0	0	0	0	0	0	0	0	0	0	0	0	0	0
psbY; photosystem II PsbY protein	K02723	0	0	0	0	0	0	0	0	0	0	0	0	1	0	0	0	0	0	0	0	0	0	0	0	0	0	0	0	0	0	0	0	0	0	0	0	0	0	0	0	0	0	0	0	0	0	0	0
psbZ; photosystem II PsbZ protein	K02724	0	0	0	0	0	0	0	0	0	0	0	0	0	0	0	0	0	0	0	0	0	0	0	0	0	0	0	0	0	0	0	0	0	0	0	0	0	0	0	0	0	0	0	0	0	0	0	0
PSMA1; 20S proteasome subunit alpha 6 [EC:3.4.25.1]	K02725	0	0	0	0	0	0	0	0	0	0	0	0	0	0	0	0	0	0	0	0	0	0	0	0	0	0	0	0	0	0	0	0	0	0	0	0	0	0	0	0	0	0	0	0	0	0	0	0
PSMA2; 20S proteasome subunit alpha 2 [EC:3.4.25.1]	K02726	0	0	0	0	0	0	0	0	0	0	0	0	0	0	0	0	0	0	0	0	0	0	0	0	0	0	0	0	0	0	0	0	0	0	0	0	0	0	0	0	0	0	0	0	0	0	0	0
PSMA4; 20S proteasome subunit alpha 3 [EC:3.4.25.1]	K02728	0	0	0	0	0	0	0	0	0	0	0	0	0	0	0	0	0	0	0	0	0	0	0	0	0	0	0	0	0	0	0	0	0	0	0	0	0	0	0	0	0	0	0	0	0	0	0	0
PSMA6; 20S proteasome subunit alpha 1 [EC:3.4.25.1]	K02730	0	0	0	0	0	0	0	0	0	0	0	0	0	0	0	0	0	0	0	0	0	0	0	0	0	0	0	0	0	0	0	0	0	0	0	0	0	0	0	0	0	0	0	0	0	0	0	0
PSMA7; 20S proteasome subunit alpha 4 [EC:3.4.25.1]	K02731	0	0	0	0	0	0	0	0	0	0	0	0	0	0	0	0	0	0	0	0	0	0	0	0	0	0	0	0	0	0	0	0	0	0	0	0	0	0	0	0	0	0	0	0	0	0	0	0
PSMB1; 20S proteasome subunit beta 6 [EC:3.4.25.1]	K02732	0	0	0	0	0	0	0	0	0	0	0	0	0	0	0	0	0	0	0	0	0	0	0	0	0	0	0	0	0	0	0	0	0	0	0	0	0	0	0	0	0	0	0	0	0	0	0	0
PSMB2; 20S proteasome subunit beta 4 [EC:3.4.25.1]	K02734	0	0	0	0	0	0	0	0	0	0	0	0	0	0	0	0	0	0	0	0	0	0	0	0	0	0	0	0	0	0	0	0	0	0	0	0	0	0	0	0	0	0	0	0	0	0	0	0
PSMB3; 20S proteasome subunit beta 3 [EC:3.4.25.1]	K02735	0	0	0	0	0	0	0	0	0	0	0	0	0	0	0	0	0	0	0	0	0	0	0	0	0	0	0	0	0	0	0	0	0	0	0	0	0	0	0	0	0	0	0	0	0	0	0	0
PSMB4; 20S proteasome subunit beta 7 [EC:3.4.25.1]	K02736	0	0	0	0	0	0	0	0	0	0	0	0	0	0	0	0	0	0	0	0	0	0	0	0	0	0	0	0	0	0	0	0	0	0	0	0	0	0	0	0	0	0	0	0	0	0	0	0
PSMB5; 20S proteasome subunit beta 5 [EC:3.4.25.1]	K02737	0	0	0	0	0	0	0	0	0	0	0	0	0	0	0	0	0	0	0	0	0	0	0	0	0	0	0	0	0	0	0	0	0	0	0	0	0	0	0	0	0	0	0	0	0	0	0	0
PSMB6; 20S proteasome subunit beta 1 [EC:3.4.25.1]	K02738	0	0	0	0	0	0	0	0	0	0	0	0	0	0	0	0	0	0	0	0	0	0	0	0	0	0	0	0	0	0	0	0	0	0	0	0	0	0	0	0	0	0	0	0	0	0	0	0
PSMB7; 20S proteasome subunit beta 2 [EC:3.4.25.1]	K02739	0	0	0	0	0	0	0	0	0	0	0	0	0	0	0	0	0	0	0	0	0	0	0	0	0	0	0	0	0	0	0	0	0	0	0	0	0	0	0	0	0	0	0	0	0	0	0	0
sprT; SprT protein	K02742	0	0	0	0	0	0	0	0	0	0	0	0	0	0	0	0	0	0	0	0	0	0	0	0	0	0	0	0	0	0	0	0	0	0	0	0	0	0	0	0	0	0	0	0	0	0	0	0
PTS-Aga-EIIA, agaF; PTS system, N-acetylgalactosamine-specific IIA component [EC:2.7.1.-]	K02744	0	0	0	0	0	0	0	0	0	0	0	0	0	0	0	0	0	0	0	0	0	0	0	0	0	0	0	0	0	0	0	0	0	0	0	0	0	0	0	0	0	0	0	0	0	0	0	0
PTS-Aga-EIID, agaE; PTS system, N-acetylgalactosamine-specific IID component	K02747	0	0	0	0	0	0	0	0	0	0	0	0	0	0	0	0	0	0	0	0	0	0	0	0	0	0	0	0	0	0	0	0	0	0	0	0	0	0	0	0	0	0	0	0	0	0	0	0
PTS-Bgl-EIIC, bglF, bglP; PTS system, beta-glucoside-specific IIC component	K02757	0	0	0	0	0	0	0	0	0	0	0	0	0	0	0	0	0	0	0	0	0	0	0	0	0	0	0	0	0	0	0	0	0	0	0	0	0	0	0	0	0	0	0	0	0	0	0	0
PTS-Cel-EIIA, celC, chbA; PTS system, cellobiose-specific IIA component [EC:2.7.1.196 2.7.1.205]	K02759	0	0	0	0	0	0	0	0	0	0	0	0	0	0	0	0	0	0	0	0	0	0	0	0	0	0	0	0	0	0	0	0	0	0	0	0	0	0	0	0	0	0	0	0	0	0	0	0
PTS-Cel-EIIC, celB, chbC; PTS system, cellobiose-specific IIC component	K02761	0	1	0	0	0	0	0	0	0	0	0	0	0	0	0	0	0	0	0	0	0	0	0	0	0	0	0	0	0	0	0	0	0	0	0	0	0	0	0	0	0	0	0	0	0	0	0	0
PTS-Fru-EIIA, fruB; PTS system, fructose-specific IIA component [EC:2.7.1.202]	K02768	0	0	1	0	1	0	0	0	1	0	1	0	0	0	0	0	0	0	0	0	0	1	1	1	0	0	1	1	0	0	0	0	0	0	0	0	0	0	0	0	0	0	0	0	0	0	2	0
PTS-Fru-EIIB, fruA; PTS system, fructose-specific IIB component [EC:2.7.1.202]	K02769	0	0	0	0	0	0	0	0	0	0	0	0	0	0	0	0	0	0	0	0	0	0	0	0	0	0	0	0	0	0	0	0	0	0	0	0	0	0	0	0	0	0	0	0	0	0	0	0
PTS-Fru-EIIC, fruA; PTS system, fructose-specific IIC component	K02770	0	0	0	0	0	0	0	0	0	0	1	0	0	0	0	0	0	0	0	0	0	0	0	0	0	0	0	0	0	0	0	0	0	0	0	1	0	0	0	0	0	0	0	0	0	1	1	0
PTS-Gat-EIIA, gatA, sgcA; PTS system, galactitol-specific IIA component [EC:2.7.1.200]	K02773	0	0	0	0	0	0	0	0	0	0	0	0	0	0	0	0	0	0	0	0	0	0	0	0	0	0	0	0	0	0	0	0	0	0	0	0	0	0	0	0	0	0	0	0	0	0	0	0
PTS-Gat-EIIB, gatB, sgcB; PTS system, galactitol-specific IIB component [EC:2.7.1.200]	K02774	0	0	0	0	0	0	0	0	0	0	0	0	0	0	0	0	0	0	0	0	0	0	0	0	0	0	0	0	0	0	0	0	0	0	0	0	0	0	0	0	0	0	0	0	0	0	0	0
PTS-Gat-EIIC, gatC, sgcC; PTS system, galactitol-specific IIC component	K02775	0	0	0	0	0	0	0	0	0	0	0	0	0	0	0	0	0	0	0	0	0	0	0	0	0	0	0	0	0	0	0	0	0	0	0	0	0	0	0	0	0	0	0	0	0	0	0	0
PTS-Glc-EIIA, crr; PTS system, sugar-specific IIA component [EC:2.7.1.-]	K02777	0	0	0	0	0	0	0	0	0	0	0	0	0	0	0	0	0	0	0	0	0	0	0	0	0	0	0	0	0	0	0	0	0	0	0	0	0	0	0	0	0	0	0	0	0	0	0	0
PTS-HPR.PTSH, ptsH; phosphocarrier protein HPr	K02784	0	0	0	0	0	0	0	0	1	0	0	0	0	0	0	0	0	0	0	0	0	0	0	0	0	0	0	0	0	0	0	0	0	0	0	0	0	0	0	0	0	0	0	0	0	0	0	0
PTS-Man-EIIA, manX; PTS system, mannose-specific IIA component [EC:2.7.1.191]	K02793	0	0	0	0	0	0	0	0	0	0	0	0	0	1	1	0	0	0	1	0	1	0	0	0	0	0	0	1	0	0	1	0	1	0	0	0	0	0	0	0	0	0	1	1	0	0	0	0
PTS-Man-EIIB, manX; PTS system, mannose-specific IIB component [EC:2.7.1.191]	K02794	0	0	0	0	0	0	0	2	0	0	0	0	0	0	0	0	0	0	0	0	0	0	0	0	0	0	0	0	0	0	0	0	0	0	0	0	0	0	0	0	0	0	1	0	0	0	0	0
PTS-Man-EIIC, manY; PTS system, mannose-specific IIC component	K02795	0	0	0	0	0	0	0	0	0	0	0	0	0	0	0	0	0	0	0	0	0	0	0	0	0	0	0	0	0	0	0	0	0	0	0	0	0	0	0	0	0	0	1	0	0	0	0	0
PTS-Man-EIID, manZ; PTS system, mannose-specific IID component	K02796	0	0	0	0	0	0	0	1	0	0	0	0	0	0	0	0	0	0	0	0	0	0	0	0	0	0	0	0	0	0	0	0	0	0	0	0	0	0	0	0	0	0	0	0	0	0	0	0
PTS-Mtl-EIIA, mtlA, cmtB; PTS system, mannitol-specific IIA component [EC:2.7.1.197]	K02798	0	0	0	0	0	0	0	0	0	0	0	0	0	0	0	0	0	0	0	0	0	0	0	0	0	0	0	0	0	0	0	0	0	0	0	0	0	0	0	0	0	0	0	0	0	0	0	0
PTS-Mtl-EIIB, mtlA, cmtA; PTS system, mannitol-specific IIB component [EC:2.7.1.197]	K02799	0	0	0	0	0	0	0	0	0	0	0	0	0	0	0	0	0	0	0	0	0	0	0	0	0	0	0	0	0	0	0	0	0	0	0	0	0	0	0	0	0	0	0	0	0	0	0	0
PTS-Mtl-EIIC, mtlA, cmtA; PTS system, mannitol-specific IIC component	K02800	0	0	0	0	0	0	0	0	0	0	0	0	0	0	0	0	0	0	0	0	0	0	0	0	0	0	0	0	0	0	0	0	0	0	0	0	0	0	0	0	0	0	0	0	0	0	0	0
PTS-Nag-EIIC, nagE; PTS system, N-acetylglucosamine-specific IIC component	K02804	0	0	0	0	0	0	0	0	0	0	0	0	0	0	0	0	0	0	0	0	0	0	0	0	0	0	0	0	0	0	0	0	0	0	0	0	0	0	0	0	0	0	0	0	0	0	0	0
wecE, rffA; dTDP-4-amino-4,6-dideoxygalactose transaminase [EC:2.6.1.59]	K02805	0	0	0	1	0	0	0	0	0	0	1	0	0	0	0	0	0	0	0	0	0	0	0	0	0	0	1	0	0	0	0	2	0	0	0	0	0	0	0	0	0	1	0	1	0	0	0	0
PTS-Ntr-EIIA, ptsN; PTS system, nitrogen regulatory IIA component [EC:2.7.1.-]	K02806	0	1	2	0	2	1	1	1	3	0	1	0	0	3	2	0	0	0	0	2	1	2	2	1	0	0	2	2	0	0	2	0	3	0	1	3	5	0	0	0	0	1	0	1	0	1	8	0
PTS-Ula-EIIA, ulaC, sgaA; PTS system, ascorbate-specific IIA component [EC:2.7.1.194]	K02821	0	0	0	0	0	0	0	0	0	0	0	0	0	0	0	0	0	0	0	0	0	0	0	0	0	0	0	0	0	0	0	0	0	0	0	0	0	0	0	0	0	0	0	0	0	0	0	0
PTS-Ula-EIIB, ulaB, sgaB; PTS system, ascorbate-specific IIB component [EC:2.7.1.194]	K02822	0	0	0	0	0	0	0	0	0	0	0	0	0	0	0	0	0	0	0	0	0	0	0	0	0	0	0	0	0	0	0	0	0	0	0	0	0	0	0	0	0	0	0	0	0	0	0	0
pyrDII; dihydroorotate dehydrogenase electron transfer subunit	K02823	0	0	1	0	1	0	0	0	1	1	0	0	0	1	0	1	1	1	0	0	1	1	1	0	1	1	1	1	1	1	1	1	1	1	0	0	0	0	1	1	2	0	1	1	1	1	1	0
pyrP, uraA; uracil permease	K02824	0	0	0	0	0	0	0	0	0	0	0	0	0	0	0	0	0	0	0	0	0	0	0	0	0	0	0	0	0	0	1	0	1	0	1	0	0	0	0	0	0	0	0	0	0	0	0	0
pyrR; pyrimidine operon attenuation protein / uracil phosphoribosyltransferase [EC:2.4.2.9]	K02825	3	0	0	0	0	0	1	0	0	1	0	0	1	1	0	1	0	1	0	1	1	0	0	0	0	0	0	1	0	1	0	0	1	1	0	1	0	0	1	0	1	0	1	1	0	1	1	1
rbfA; ribosome-binding factor A	K02834	4	0	1	1	1	1	1	0	1	2	1	0	1	1	1	1	0	0	0	1	1	1	1	1	0	0	1	1	1	1	1	1	0	1	1	1	0	2	1	1	1	1	1	1	2	2	1	1
prfA, MTRF1, MRF1; peptide chain release factor 1	K02835	2	1	0	1	1	1	1	1	1	1	0	1	1	1	0	1	0	0	1	0	1	1	1	1	1	1	1	1	1	1	1	1	2	1	0	0	1	1	1	1	0	1	0	0	0	2	1	0
prfB; peptide chain release factor 2	K02836	3	2	1	1	1	1	1	2	1	1	0	0	1	0	0	1	0	0	0	1	1	1	1	2	0	1	0	1	1	1	1	1	1	1	0	1	1	1	1	0	1	1	1	1	1	1	1	0
prfC; peptide chain release factor 3	K02837	4	1	0	1	1	1	0	1	0	2	0	0	2	2	1	1	0	0	0	0	0	0	0	1	0	0	0	0	0	0	0	0	0	0	0	0	0	0	0	1	0	0	0	0	0	0	0	0
frr, MRRF, RRF; ribosome recycling factor	K02838	4	0	1	2	1	1	1	1	1	1	1	0	1	1	0	1	0	0	0	0	1	0	0	1	0	1	1	1	1	1	0	1	1	1	1	0	1	0	1	1	1	1	1	1	1	1	1	1
prfH; peptide chain release factor	K02839	0	0	0	0	0	0	0	0	0	0	0	0	0	0	0	0	0	0	0	0	0	0	0	0	0	0	0	0	0	0	0	0	0	0	0	0	0	0	0	0	0	0	0	0	0	0	0	0
waaC, rfaC; heptosyltransferase I [EC:2.4.-.-]	K02841	0	0	1	0	1	0	1	0	2	0	0	0	0	0	0	1	0	0	1	1	1	1	1	1	2	0	1	2	0	0	1	0	1	0	0	0	0	0	0	0	0	0	0	0	1	1	1	0
waaF, rfaF; heptosyltransferase II [EC:2.4.-.-]	K02843	2	1	2	0	1	3	2	0	0	1	0	1	0	0	1	2	2	0	1	0	1	1	2	0	1	2	3	1	0	0	2	2	2	0	1	2	0	0	0	0	0	2	0	0	2	2	2	0
waaG, rfaG; UDP-glucose:(heptosyl)LPS alpha-1,3-glucosyltransferase [EC:2.4.1.-]	K02844	0	0	1	0	0	0	1	0	0	1	0	0	0	0	1	1	2	0	0	0	0	1	1	1	0	1	1	0	0	0	2	0	1	0	0	0	0	0	0	0	0	0	0	0	0	0	0	0
solA; N-methyl-L-tryptophan oxidase [EC:1.5.3.-]	K02846	0	0	0	0	1	0	0	0	0	0	0	0	0	0	0	0	0	0	0	0	0	0	0	0	0	0	0	0	0	0	0	0	0	0	0	0	0	0	0	0	0	0	0	0	0	0	0	0
waaL, rfaL; O-antigen ligase [EC:2.4.1.-]	K02847	0	0	0	0	0	0	0	0	0	0	0	0	0	0	0	0	0	0	0	0	0	0	0	0	0	0	0	0	0	0	0	0	0	0	0	0	0	0	0	0	0	0	0	0	0	0	0	0
waaP, rfaP; heptose I phosphotransferase [EC:2.7.1.-]	K02848	0	0	0	0	0	0	0	0	0	0	0	0	0	0	0	0	0	0	0	0	0	0	1	0	0	0	0	0	0	0	0	0	0	0	0	0	0	0	0	0	0	0	0	0	0	0	0	0
waaQ, rfaQ; heptosyltransferase III [EC:2.4.-.-]	K02849	0	1	0	0	0	1	2	0	0	0	0	0	0	0	1	0	0	0	0	0	1	0	0	0	0	0	0	0	0	0	2	0	0	0	1	0	0	0	0	0	0	0	1	0	0	1	0	0
wecA, tagO, rfe; UDP-GlcNAc:undecaprenyl-phosphate/decaprenyl-phosphate GlcNAc-1-phosphate transferase [EC:2.7.8.33 2.7.8.35]	K02851	0	0	1	0	3	0	1	2	3	2	0	0	0	1	0	0	0	0	1	2	0	2	5	0	1	2	0	2	0	0	2	0	4	0	1	0	0	0	1	0	0	0	0	1	1	2	3	0
wecG, rffM; UDP-N-acetyl-D-mannosaminouronate:lipid I N-acetyl-D-mannosaminouronosyltransferase [EC:2.4.1.180]	K02852	0	0	0	0	0	0	0	0	0	0	0	0	0	0	0	0	0	0	0	0	0	0	0	0	0	0	0	0	0	0	0	0	0	0	0	0	0	0	0	0	0	0	0	0	0	0	0	0
rhaR; AraC family transcriptional regulator, L-rhamnose operon transcriptional activator RhaR	K02854	0	0	0	0	0	2	0	0	0	0	0	0	0	0	0	0	0	0	0	0	0	0	0	0	0	1	0	0	0	0	0	0	0	0	0	0	2	0	0	0	0	0	0	0	0	0	0	0
rhaS; AraC family transcriptional regulator, L-rhamnose operon regulatory protein RhaS	K02855	0	0	0	0	0	2	0	0	0	0	0	0	0	0	0	0	0	0	0	0	0	0	0	0	0	0	0	0	0	0	0	0	0	0	0	0	2	0	0	0	0	0	0	0	0	0	1	0
rhaT; L-rhamnose-H+ transport protein	K02856	1	0	0	0	0	0	0	0	0	0	0	0	0	0	0	0	0	0	0	1	0	2	1	0	0	0	1	0	0	0	0	0	0	0	0	1	0	0	0	1	0	0	0	0	0	0	2	0
ribB, RIB3; 3,4-dihydroxy 2-butanone 4-phosphate synthase [EC:4.1.99.12]	K02858	0	0	0	0	0	0	0	0	0	0	0	0	0	0	0	0	0	0	0	0	0	0	0	0	0	0	0	0	0	0	0	0	0	0	0	0	0	0	0	0	0	0	0	0	0	0	0	0
rimM; 16S rRNA processing protein RimM	K02860	1	0	0	1	0	0	1	0	0	1	0	0	1	2	0	1	0	1	0	0	1	0	0	0	0	0	0	1	0	1	1	1	1	1	1	0	1	1	1	1	0	1	1	1	1	0	0	0
ctaG; putative membrane protein	K02862	0	1	0	0	0	1	0	0	0	0	0	0	0	0	0	0	0	0	0	0	0	0	0	0	0	0	0	0	0	0	0	0	0	0	0	0	0	0	0	0	0	0	0	0	0	0	0	0
RP-L1, MRPL1, rplA; large subunit ribosomal protein L1	K02863	0	0	1	0	1	1	1	0	1	0	0	0	1	1	1	2	0	0	2	0	1	1	1	1	0	0	1	1	0	1	1	1	2	1	1	1	0	1	1	1	1	1	1	0	0	1	1	0
RP-L10, MRPL10, rplJ; large subunit ribosomal protein L10	K02864	0	0	0	0	1	1	1	0	1	0	0	0	1	1	1	2	0	0	1	1	1	1	0	1	0	0	0	1	0	1	1	1	2	1	1	1	0	1	0	1	1	1	1	0	1	1	1	0
RP-L10Ae, RPL10A; large subunit ribosomal protein L10Ae	K02865	0	0	0	0	0	0	0	0	0	0	0	0	0	0	0	0	0	0	0	0	0	0	0	0	0	0	0	0	0	0	0	0	0	0	0	0	0	0	0	0	0	0	0	0	0	0	0	0
RP-L10e, RPL10; large subunit ribosomal protein L10e	K02866	0	0	0	0	0	0	0	0	0	0	0	0	0	0	0	0	0	0	0	0	0	0	0	0	0	0	0	0	0	0	0	0	0	0	0	0	0	0	0	0	0	0	0	0	0	0	0	0
RP-L11, MRPL11, rplK; large subunit ribosomal protein L11	K02867	0	0	1	0	1	1	1	0	1	0	0	0	1	0	1	2	0	0	1	0	1	1	1	1	1	0	1	1	0	1	1	1	2	1	1	0	0	1	1	1	1	1	1	0	0	1	2	0
RP-L11e, RPL11; large subunit ribosomal protein L11e	K02868	0	0	0	0	0	0	0	0	0	0	0	0	0	0	0	0	0	0	0	0	0	0	0	0	0	0	0	0	0	0	0	0	0	0	0	0	0	0	0	0	0	0	0	0	0	0	0	0
RP-L12, rpl12; large subunit ribosomal protein L12	K02869	0	0	0	0	0	0	0	0	0	0	0	0	0	0	0	0	0	0	0	0	0	0	0	0	0	0	0	0	0	0	0	0	0	0	0	0	0	0	0	0	0	0	0	0	0	0	0	0
RP-L13, MRPL13, rplM; large subunit ribosomal protein L13	K02871	0	0	1	1	1	1	1	1	1	2	1	0	1	1	0	2	0	1	1	0	1	1	1	0	0	0	1	1	0	1	1	1	1	1	1	0	2	1	1	1	1	1	1	1	0	1	1	0
RP-L13Ae, RPL13A; large subunit ribosomal protein L13Ae	K02872	0	0	0	0	0	0	0	0	0	0	0	0	0	0	0	0	0	0	0	0	0	0	0	0	0	0	0	0	0	0	0	0	0	0	0	0	0	0	0	0	0	0	0	0	0	0	0	0
RP-L13e, RPL13; large subunit ribosomal protein L13e	K02873	0	0	0	0	0	0	0	0	0	0	0	0	0	0	0	0	0	0	0	0	0	0	0	0	0	0	0	0	0	0	0	0	0	0	0	0	0	0	0	0	0	0	0	0	0	0	0	0
RP-L14, MRPL14, rplN; large subunit ribosomal protein L14	K02874	0	0	1	0	1	1	1	1	1	0	0	0	0	1	1	1	1	0	1	1	1	1	1	1	0	1	1	1	0	1	1	1	1	1	1	0	0	1	0	1	1	1	1	1	0	1	1	0
RP-L14e, RPL14; large subunit ribosomal protein L14e	K02875	0	0	0	0	0	0	0	0	0	0	0	0	0	0	0	0	0	0	0	0	0	0	0	0	0	0	0	0	0	0	0	0	0	0	0	0	0	0	0	0	0	0	0	0	0	0	0	0
RP-L15, MRPL15, rplO; large subunit ribosomal protein L15	K02876	0	0	1	0	1	1	1	1	1	0	0	0	1	1	0	1	1	0	1	1	1	1	0	0	1	0	1	1	0	1	1	1	1	1	1	0	1	1	1	1	1	1	0	0	1	1	1	0
RP-L15e, RPL15; large subunit ribosomal protein L15e	K02877	0	0	0	0	0	0	0	0	0	0	0	0	0	0	0	0	0	0	0	0	0	0	0	0	0	0	0	0	0	0	0	0	0	0	0	0	0	0	0	0	0	0	0	0	0	0	0	0
RP-L16, MRPL16, rplP; large subunit ribosomal protein L16	K02878	0	0	1	0	1	2	1	1	1	0	0	0	0	1	1	1	0	0	1	1	1	1	1	1	0	1	0	1	0	1	1	1	1	1	1	0	0	1	0	1	1	1	1	1	0	1	1	0
RP-L17, MRPL17, rplQ; large subunit ribosomal protein L17	K02879	2	0	1	0	1	1	1	0	1	2	0	0	1	0	0	1	0	0	1	0	1	1	0	1	1	1	3	1	1	1	1	1	1	1	1	0	1	1	1	1	1	1	1	1	1	1	1	1
RP-L18, MRPL18, rplR; large subunit ribosomal protein L18	K02881	0	0	1	0	1	1	1	0	1	0	0	0	1	1	0	1	0	0	0	1	0	1	0	1	1	0	1	1	0	1	1	1	1	1	1	0	1	1	0	1	1	1	0	0	1	1	1	0
RP-L18e, RPL18; large subunit ribosomal protein L18e	K02883	0	0	0	0	0	0	0	0	0	0	0	0	0	0	0	0	0	0	0	0	0	0	0	0	0	0	0	0	0	0	0	0	0	0	0	0	0	0	0	0	0	0	0	0	0	0	0	0
RP-L19, MRPL19, rplS; large subunit ribosomal protein L19	K02884	4	1	1	1	1	1	1	1	1	1	0	0	1	1	0	1	1	0	0	0	1	0	0	1	1	0	2	1	0	1	2	1	1	1	0	1	1	0	1	1	0	1	1	1	1	1	1	1
RP-L19e, RPL19; large subunit ribosomal protein L19e	K02885	0	0	0	1	0	0	0	0	0	0	0	0	0	0	0	0	0	0	0	0	0	0	0	0	0	0	0	0	0	0	0	0	0	0	0	0	0	0	0	0	0	0	0	0	0	0	0	0
RP-L2, MRPL2, rplB; large subunit ribosomal protein L2	K02886	0	0	1	0	1	1	1	0	1	1	0	1	0	1	1	1	0	0	1	1	1	2	1	1	0	0	0	1	0	1	1	1	1	1	0	0	1	1	0	1	1	1	1	2	0	1	1	0
RP-L20, MRPL20, rplT; large subunit ribosomal protein L20	K02887	1	0	1	1	1	1	1	1	1	1	0	0	0	1	1	1	1	0	1	1	1	1	1	1	0	0	1	1	1	1	1	1	1	1	1	1	1	0	1	1	1	1	1	1	1	1	1	0
RP-L21, MRPL21, rplU; large subunit ribosomal protein L21	K02888	1	1	1	1	1	1	1	0	1	1	0	0	1	1	0	1	1	1	0	0	0	1	0	1	0	0	0	1	0	1	1	1	1	1	1	0	1	1	1	1	1	1	1	1	0	1	1	0
RP-L21e, RPL21; large subunit ribosomal protein L21e	K02889	0	0	0	0	0	0	0	0	0	0	0	0	0	0	0	0	0	0	0	0	0	0	0	0	0	0	0	0	0	0	0	0	0	0	0	0	0	0	0	0	0	0	0	0	0	0	0	0
RP-L22, MRPL22, rplV; large subunit ribosomal protein L22	K02890	0	0	1	0	1	2	1	0	1	1	0	1	0	1	1	1	0	0	1	1	0	1	1	1	0	0	0	1	0	1	1	1	1	1	1	0	0	1	0	1	1	1	1	2	0	1	0	0
RP-L22e, RPL22; large subunit ribosomal protein L22e	K02891	0	0	0	0	0	0	0	0	0	0	0	0	0	0	0	0	0	0	0	0	0	0	0	0	0	0	0	0	0	0	0	0	0	0	0	0	0	0	0	0	0	0	0	0	0	0	0	0
RP-L23, MRPL23, rplW; large subunit ribosomal protein L23	K02892	0	0	1	0	1	1	1	0	1	1	0	1	0	1	2	1	0	0	1	0	1	1	1	1	0	0	0	1	0	1	1	1	1	1	0	0	1	1	0	1	1	1	1	2	0	1	1	0
RP-L23Ae, RPL23A; large subunit ribosomal protein L23Ae	K02893	0	0	0	0	0	0	0	0	0	0	0	0	0	0	0	0	0	0	0	0	0	0	0	0	0	0	0	0	0	0	0	0	0	0	0	0	0	0	0	0	0	0	0	0	0	0	0	0
RP-L23e, RPL23; large subunit ribosomal protein L23e	K02894	0	0	0	0	0	0	0	0	0	0	0	0	0	0	0	0	0	0	0	0	0	0	0	0	0	0	0	0	0	0	0	0	0	0	0	0	0	0	0	0	0	0	0	0	0	0	0	0
RP-L24, MRPL24, rplX; large subunit ribosomal protein L24	K02895	0	0	1	0	1	1	1	1	1	1	0	0	0	1	2	1	1	0	1	1	1	1	1	0	0	1	1	1	0	1	1	1	1	1	1	0	0	1	0	1	1	1	1	1	0	1	1	0
RP-L24e, RPL24; large subunit ribosomal protein L24e	K02896	0	0	0	0	0	0	0	0	0	0	0	0	0	0	0	0	0	0	0	0	0	0	0	0	0	0	0	0	0	0	0	0	0	0	0	0	0	0	0	0	0	0	0	0	0	0	0	0
RP-L25, rplY; large subunit ribosomal protein L25	K02897	2	1	1	1	1	0	1	1	1	2	0	1	0	1	0	1	1	0	1	2	1	1	1	1	0	0	2	1	0	1	1	2	1	1	0	0	1	1	1	1	1	1	1	1	0	1	1	2
RP-L27, MRPL27, rpmA; large subunit ribosomal protein L27	K02899	0	1	1	1	1	1	1	1	0	2	1	0	1	1	0	1	0	1	0	1	1	1	0	1	0	0	1	1	0	1	1	1	1	1	1	1	1	1	1	1	1	1	1	1	0	0	1	0
RP-L27e, RPL27; large subunit ribosomal protein L27e	K02901	0	0	0	0	0	0	0	0	0	0	0	0	0	0	0	0	0	0	0	0	0	0	0	0	0	0	0	0	0	0	0	0	0	0	0	0	0	0	0	0	0	0	0	0	0	0	0	0
RP-L28, MRPL28, rpmB; large subunit ribosomal protein L28	K02902	2	0	1	1	1	1	1	1	0	1	0	0	0	1	0	1	0	1	0	0	1	1	1	1	0	1	0	1	1	1	0	1	1	0	0	0	1	1	0	1	0	1	0	1	1	2	1	0
RP-L29, rpmC; large subunit ribosomal protein L29	K02904	0	0	0	0	1	1	1	1	0	0	0	0	0	1	1	1	0	0	1	0	1	1	1	1	0	1	0	1	0	1	1	1	1	1	1	0	0	1	0	1	1	1	1	1	0	1	1	0
RP-L3, MRPL3, rplC; large subunit ribosomal protein L3	K02906	0	0	1	1	1	1	1	0	1	1	0	0	0	1	1	1	0	0	0	0	1	1	1	1	0	0	1	0	0	1	1	1	1	1	0	1	1	1	0	1	2	1	1	1	0	1	1	0
RP-L30, MRPL30, rpmD; large subunit ribosomal protein L30	K02907	0	0	0	0	0	0	0	0	0	0	0	0	0	1	0	1	0	0	0	0	1	0	0	0	0	0	0	1	0	1	1	1	1	1	1	0	1	1	1	1	1	1	0	0	0	0	0	0
RP-L30e, RPL30; large subunit ribosomal protein L30e	K02908	0	0	0	0	0	0	0	0	0	0	0	0	0	0	0	0	0	0	0	0	0	0	0	0	0	0	0	0	0	0	0	0	0	0	0	0	0	0	0	0	0	0	0	0	0	0	0	0
RP-L31, rpmE; large subunit ribosomal protein L31	K02909	1	0	1	1	1	1	1	0	1	1	0	1	1	1	0	1	0	0	1	0	2	1	1	1	1	1	1	1	1	1	1	1	1	1	1	0	1	1	1	1	1	1	1	0	0	0	1	0
RP-L31e, RPL31; large subunit ribosomal protein L31e	K02910	0	0	0	0	0	0	0	0	0	0	0	0	0	0	0	0	0	0	0	0	0	0	0	0	0	0	0	0	0	0	0	0	0	0	0	0	0	0	0	0	0	0	0	0	0	0	0	0
RP-L32, MRPL32, rpmF; large subunit ribosomal protein L32	K02911	4	0	0	1	0	1	1	0	0	1	0	0	1	1	0	1	0	1	0	1	1	0	0	1	0	0	1	0	0	1	1	1	0	0	1	0	0	1	0	1	0	1	0	0	0	2	1	0
RP-L32e, RPL32; large subunit ribosomal protein L32e	K02912	0	0	0	0	0	0	0	0	0	0	0	0	0	0	0	0	0	0	0	0	0	0	0	0	0	0	0	0	0	0	0	0	0	0	0	0	0	0	0	0	0	0	0	0	0	0	0	0
RP-L33, MRPL33, rpmG; large subunit ribosomal protein L33	K02913	2	1	0	1	1	1	0	0	0	1	0	0	1	0	0	0	0	0	0	0	0	1	0	0	0	0	0	0	0	0	0	0	0	0	0	0	1	1	0	1	1	1	0	0	0	0	1	0
RP-L34, MRPL34, rpmH; large subunit ribosomal protein L34	K02914	0	0	0	1	0	0	0	0	0	1	0	0	1	0	0	1	0	1	0	0	0	0	0	1	0	0	0	1	0	0	0	0	0	1	0	0	0	0	0	0	0	0	0	0	0	1	0	0
RP-L34e, RPL34; large subunit ribosomal protein L34e	K02915	0	0	0	0	0	0	0	0	0	0	0	0	0	0	0	0	0	0	0	0	0	0	0	0	0	0	0	0	0	0	0	0	0	0	0	0	0	0	0	0	0	0	0	0	0	0	0	0
RP-L35, MRPL35, rpmI; large subunit ribosomal protein L35	K02916	0	0	0	1	1	0	1	1	0	1	0	0	0	0	1	1	1	0	0	1	0	1	1	1	0	0	1	0	1	0	1	1	1	1	1	0	1	1	1	1	0	1	1	0	1	1	1	0
RP-L35Ae, RPL35A; large subunit ribosomal protein L35Ae	K02917	0	0	0	0	0	0	0	0	0	0	0	0	0	0	0	0	0	0	0	0	0	0	0	0	0	0	0	0	0	0	0	0	0	0	0	0	0	0	0	0	0	0	0	0	0	0	0	0
RP-L35e, RPL35; large subunit ribosomal protein L35e	K02918	0	0	0	0	0	0	0	0	0	0	0	0	0	0	0	0	0	0	0	0	0	0	0	0	0	0	0	0	0	0	0	0	0	0	0	0	0	0	0	0	0	0	0	0	0	0	0	0
RP-L36, MRPL36, rpmJ; large subunit ribosomal protein L36	K02919	0	0	1	0	0	1	0	0	1	0	0	0	1	0	0	0	0	0	0	0	1	0	0	0	0	0	0	0	0	0	0	0	0	0	0	0	1	0	0	2	0	0	0	0	0	1	0	1
RP-L37Ae, RPL37A; large subunit ribosomal protein L37Ae	K02921	0	0	0	0	0	0	0	0	0	0	0	0	0	0	0	0	0	0	0	0	0	0	0	0	0	0	0	0	0	0	0	0	0	0	0	0	0	0	0	0	0	0	0	0	0	0	0	0
RP-L37e, RPL37; large subunit ribosomal protein L37e	K02922	0	0	0	0	0	0	0	0	0	0	0	0	0	0	0	0	0	0	0	0	0	0	0	0	0	0	0	0	0	0	0	0	0	0	0	0	0	0	0	0	0	0	0	0	0	0	0	0
RP-L38e, RPL38; large subunit ribosomal protein L38e	K02923	0	0	0	0	0	0	0	0	0	0	0	0	0	0	0	0	0	0	0	0	0	0	0	0	0	0	0	0	0	0	0	0	0	0	0	0	0	0	0	0	0	0	0	0	0	0	0	0
RP-L39e, RPL39; large subunit ribosomal protein L39e	K02924	0	0	0	0	0	0	0	0	0	0	0	0	0	0	0	0	0	0	0	0	0	0	0	0	0	0	0	0	0	0	0	0	0	0	0	0	0	0	0	0	0	0	0	0	0	0	0	0
RP-L4, MRPL4, rplD; large subunit ribosomal protein L4	K02926	0	0	1	0	1	1	1	0	1	1	0	0	0	1	1	1	0	0	1	0	1	1	1	1	0	0	0	1	0	1	1	1	1	1	0	0	1	1	0	1	1	1	1	1	0	1	1	0
RP-L40e, RPL40; large subunit ribosomal protein L40e	K02927	0	0	0	0	0	0	0	0	0	0	0	0	0	0	0	0	0	0	0	0	0	0	0	0	0	0	0	0	0	0	0	0	0	0	0	0	0	0	0	0	0	0	0	0	0	0	0	0
RP-L41e, RPL41; large subunit ribosomal protein L41e	K02928	0	0	0	0	0	0	0	0	0	0	0	0	0	0	0	0	0	0	0	0	0	0	0	0	0	0	0	0	0	0	0	0	0	0	0	0	0	0	0	0	0	0	0	0	0	0	0	0
RP-L44e, RPL44; large subunit ribosomal protein L44e	K02929	0	0	0	0	0	0	0	0	0	0	0	0	0	0	0	0	0	0	0	0	0	0	0	0	0	0	0	0	0	0	0	0	0	0	0	0	0	0	0	0	0	0	0	0	0	0	0	0
RP-L4e, RPL4; large subunit ribosomal protein L4e	K02930	0	0	0	0	0	0	0	0	0	0	0	0	0	0	0	0	0	0	0	0	0	0	0	0	0	0	0	0	0	0	0	0	0	0	0	0	0	0	0	0	0	0	0	0	0	0	0	0
RP-L5, MRPL5, rplE; large subunit ribosomal protein L5	K02931	0	0	1	0	1	1	1	1	1	1	0	0	0	1	1	2	1	0	1	1	1	1	1	1	0	1	1	1	0	1	1	1	1	1	1	0	0	1	0	1	1	1	1	1	1	1	1	0
RP-L6, MRPL6, rplF; large subunit ribosomal protein L6	K02933	0	0	1	0	1	1	1	1	1	0	0	0	1	1	1	1	0	0	0	1	1	1	0	1	1	1	1	1	0	1	1	1	1	1	1	0	1	1	0	1	1	1	0	0	1	1	1	0
RP-L6e, RPL6; large subunit ribosomal protein L6e	K02934	0	0	0	0	0	0	0	0	0	0	0	0	0	0	0	0	0	0	0	0	0	0	0	0	0	0	0	0	0	0	0	0	0	0	0	0	0	0	0	0	0	0	0	0	0	0	0	0
RP-L7, MRPL12, rplL; large subunit ribosomal protein L7/L12	K02935	0	0	1	0	1	1	1	0	1	0	0	0	1	1	1	1	0	0	1	1	1	1	1	1	0	0	0	1	0	1	1	1	2	0	0	1	0	1	0	1	1	1	1	0	1	1	1	0
RP-L7Ae, RPL7A; large subunit ribosomal protein L7Ae	K02936	0	0	0	0	0	0	0	0	0	0	0	0	0	0	0	0	0	0	0	0	0	0	0	0	0	0	0	0	0	0	0	0	0	0	0	0	0	0	0	0	0	0	0	0	0	0	0	0
RP-L9, MRPL9, rplI; large subunit ribosomal protein L9	K02939	1	0	1	1	1	0	1	0	1	1	0	0	1	1	0	1	0	0	1	1	1	1	1	0	0	0	1	0	1	1	1	1	1	1	1	1	1	1	1	1	0	0	1	1	1	1	1	0
RP-LP0, RPLP0; large subunit ribosomal protein LP0	K02941	0	0	0	0	0	0	0	0	0	0	0	0	0	0	0	0	0	0	0	0	0	0	0	0	0	0	0	0	0	0	0	0	0	0	0	0	0	0	0	0	0	0	0	0	0	0	0	0
RP-LX, rplX; large subunit ribosomal protein LX	K02944	0	0	0	0	0	0	0	0	0	0	0	0	0	0	0	0	0	0	0	0	0	0	0	0	0	0	0	0	0	0	0	0	0	0	0	0	0	0	0	0	0	0	0	0	0	0	0	0
RP-S1, rpsA; small subunit ribosomal protein S1	K02945	4	1	1	4	2	1	1	1	3	2	1	1	2	2	0	2	1	1	1	0	1	3	0	1	2	0	0	1	1	1	5	0	3	0	1	1	4	1	1	1	0	1	2	1	0	2	1	0
RP-S10, MRPS10, rpsJ; small subunit ribosomal protein S10	K02946	0	0	1	0	1	1	1	0	1	1	0	0	1	1	1	1	0	0	0	0	1	1	1	1	0	0	2	1	0	1	1	1	1	1	0	1	1	1	0	1	1	1	1	1	0	1	1	0
RP-S11, MRPS11, rpsK; small subunit ribosomal protein S11	K02948	0	0	1	0	1	1	1	1	1	0	0	0	1	0	1	1	0	0	1	1	1	1	1	1	1	1	1	1	0	1	1	1	1	1	0	0	1	1	1	2	1	1	1	2	1	1	1	1
RP-S11e, RPS11; small subunit ribosomal protein S11e	K02949	0	0	0	0	0	0	0	0	0	0	0	0	0	0	0	0	0	0	0	0	0	0	0	0	0	0	0	0	0	0	0	0	0	0	0	0	0	0	0	0	0	0	0	0	0	0	0	0
[truncated: 5,231 more rows]
[truncated: 41 more columns]
